# Supplementary material
Source: MDPI journal article supplement (https://www.mdpi.com/2304-6740/1/1/46)
Supplement: s1 [file s1]

 
data_1a 

_nottingham_internal_coll_name         GMSTLH
_nottingham_internal_coll_number       10955
_nottingham_internal_coll_client       GM/STL
_nottingham_internal_coll_type         sphere
_nottingham_internal_coll_frame_time   '75'
_nottingham_internal_coll_frame_width  '0.3'
_nottingham_internal_coll_frame_method '\w'
_nottingham_internal_coll_user         DPM
_nottingham_internal_coll_date         05/12/2011
_nottingham_internal_process_user      DPM
_nottingham_internal_process_date      07/12/2011
_nottingham_internal_solution_user     DPM
_nottingham_internal_solution_date     06/12/2011
_nottingham_internal_refinement_user   DPM
_nottingham_internal_refinement_date   07/12/2011
_nottingham_internal_validation_user   ?
_nottingham_internal_validation_date   ?
_nottingham_internal_archive_date      ?
 
_audit_creation_method             'enCIFer editing of SHELXL97 CIF output' 
_chemical_name_systematic 
; 
 ? 
; 
_chemical_name_common             ? 
_chemical_melting_point           ? 
_chemical_formula_moiety          'C35 H47 I2 N2 Nd O P2 Si2, C7 H8' 
_chemical_formula_sum             'C42 H55 I2 N2 Nd O P2 Si2' 
_chemical_formula_weight          1120.04 
 
loop_ 
 _atom_type_symbol 
 _atom_type_description 
 _atom_type_scat_dispersion_real 
 _atom_type_scat_dispersion_imag 
 _atom_type_scat_source 
 'C'  'C'   0.0033   0.0016 
 'International Tables Vol C Tables 4.2.6.8 and 6.1.1.4' 
 'H'  'H'   0.0000   0.0000 
 'International Tables Vol C Tables 4.2.6.8 and 6.1.1.4' 
 'I'  'I'  -0.4742   1.8119 
 'International Tables Vol C Tables 4.2.6.8 and 6.1.1.4' 
 'N'  'N'   0.0061   0.0033 
 'International Tables Vol C Tables 4.2.6.8 and 6.1.1.4' 
 'Nd'  'Nd'  -0.1943   3.0179 
 'International Tables Vol C Tables 4.2.6.8 and 6.1.1.4' 
 'O'  'O'   0.0106   0.0060 
 'International Tables Vol C Tables 4.2.6.8 and 6.1.1.4' 
 'P'  'P'   0.1023   0.0942 
 'International Tables Vol C Tables 4.2.6.8 and 6.1.1.4' 
 'Si'  'Si'   0.0817   0.0704 
 'International Tables Vol C Tables 4.2.6.8 and 6.1.1.4' 
 
_symmetry_cell_setting            'Triclinic'
_symmetry_space_group_name_H-M    'P -1' 
_symmetry_space_group_name_Hall   '-P 1' 

loop_ 
 _symmetry_equiv_pos_as_xyz 
 'x, y, z' 
 '-x, -y, -z' 
 
_cell_length_a                    9.839(2) 
_cell_length_b                    12.426(3) 
_cell_length_c                    19.947(5) 
_cell_angle_alpha                 106.347(5) 
_cell_angle_beta                  96.476(4) 
_cell_angle_gamma                 98.785(4) 
_cell_volume                      2281.3(9) 
_cell_formula_units_Z             2 
_cell_measurement_temperature     90(2) 
_cell_measurement_reflns_used     10939
_cell_measurement_theta_min       2.22
_cell_measurement_theta_max       27.5

_exptl_crystal_description        'lath'
_exptl_crystal_colour             'blue' 
_exptl_crystal_size_max           0.06 
_exptl_crystal_size_mid           0.04 
_exptl_crystal_size_min           0.02 
_exptl_crystal_density_meas       ? 
_exptl_crystal_density_diffrn     1.631 
_exptl_crystal_density_method     'not measured' 
_exptl_crystal_F_000              1106 
_exptl_absorpt_coefficient_mu     2.647 
_exptl_absorpt_correction_type    multi-scan
_exptl_absorpt_correction_T_min   0.327
_exptl_absorpt_correction_T_max   0.43
_exptl_absorpt_process_details    'SADABS 2007/2' 
 
_exptl_special_details 
; 
 ? 
; 

_diffrn_ambient_temperature       90(2) 
_diffrn_radiation_wavelength      0.71073 
_diffrn_radiation_type            MoK\a 
_diffrn_radiation_source          'normal-focus sealed tube' 
_diffrn_radiation_monochromator   graphite
_diffrn_measurement_device_type   'Bruker SMART APEX CCD diffractometer'
_diffrn_measurement_method        '\w rotation with narrow frames'
_diffrn_detector_area_resol_mean  ?
_diffrn_standards_number          0
_diffrn_standards_interval_count  .
_diffrn_standards_interval_time   ?
_diffrn_standards_decay_%         0 
_diffrn_reflns_number             20251 
_diffrn_reflns_av_R_equivalents   0.0267 
_diffrn_reflns_av_sigmaI/netI     0.0448 
_diffrn_reflns_limit_h_min        -12 
_diffrn_reflns_limit_h_max        12 
_diffrn_reflns_limit_k_min        -16 
_diffrn_reflns_limit_k_max        16 
_diffrn_reflns_limit_l_min        -25 
_diffrn_reflns_limit_l_max        25 
_diffrn_reflns_theta_min          2.12 
_diffrn_reflns_theta_max          27.55 
_reflns_number_total              10266 
_reflns_number_gt                 9590 
_reflns_threshold_expression      I>2\s(I)

_computing_data_collection        'Bruker SMART version 5.625 (Bruker, 2001)' 
_computing_cell_refinement        'Bruker SAINT version 6.36A (Bruker, 2000)' 
_computing_data_reduction         'Bruker SAINT; SHELXTL (Sheldrick, 2008)' 
_computing_structure_solution     'SHELXTL (Sheldrick, 2008)' 
_computing_structure_refinement   'SHELXL97 (Sheldrick, 2008)' 
_computing_molecular_graphics     'SHELXTL (Sheldrick, 2008)' 
_computing_publication_material   'enCIFer(Allen et al., 2004); PLATON (Spek, 2009)' 
 
_refine_special_details 
; 
 Refinement of F^2^ against ALL reflections.  The weighted R-factor wR and 
 goodness of fit S are based on F^2^, conventional R-factors R are based 
 on F, with F set to zero for negative F^2^. The threshold expression of 
 F^2^ > 2sigma(F^2^) is used only for calculating R-factors(gt) etc. and is 
 not relevant to the choice of reflections for refinement.  R-factors based 
 on F^2^ are statistically about twice as large as those based on F, and R- 
 factors based on ALL data will be even larger. 
; 
 
_refine_ls_structure_factor_coef  Fsqd  
_refine_ls_matrix_type            full 
_refine_ls_weighting_scheme       calc  
_refine_ls_weighting_details 
 'calc w=1/[\s^2^(Fo^2^)+(0.0155P)^2^+6.5922P] where P=(Fo^2^+2Fc^2^)/3' 
_atom_sites_solution_primary      direct 
_atom_sites_solution_secondary    difmap 
_atom_sites_solution_hydrogens    'geom, Me from difmap' 
_refine_ls_hydrogen_treatment     constr 
_refine_ls_extinction_method      none 
_refine_ls_extinction_coef        ? 
_refine_ls_number_reflns          10266 
_refine_ls_number_parameters      476 
_refine_ls_number_restraints      0 
_refine_ls_R_factor_all           0.0505 
_refine_ls_R_factor_gt            0.0461 
_refine_ls_wR_factor_ref          0.0915 
_refine_ls_wR_factor_gt           0.0898 
_refine_ls_goodness_of_fit_ref    1.305 
_refine_ls_restrained_S_all       1.305 
_refine_ls_shift/su_max           0.001 
_refine_ls_shift/su_mean          0.000 
 
loop_ 
 _atom_site_label 
 _atom_site_type_symbol 
 _atom_site_fract_x 
 _atom_site_fract_y 
 _atom_site_fract_z 
 _atom_site_U_iso_or_equiv 
 _atom_site_adp_type 
 _atom_site_occupancy 
 _atom_site_symmetry_multiplicity 
 _atom_site_calc_flag 
 _atom_site_refinement_flags 
 _atom_site_disorder_assembly 
 _atom_site_disorder_group 
Nd1 Nd 0.01958(3) 0.14785(2) 0.315310(13) 0.01329(6) Uani 1 1 d . . . 
I1 I -0.23755(3) 0.02275(3) 0.197569(18) 0.02216(8) Uani 1 1 d . . . 
I2 I 0.18402(3) 0.24979(3) 0.470590(17) 0.01998(8) Uani 1 1 d . . . 
P1 P 0.27147(12) 0.22726(10) 0.24262(6) 0.0130(2) Uani 1 1 d . . . 
P2 P 0.22913(12) -0.01441(10) 0.27047(6) 0.0128(2) Uani 1 1 d . . . 
Si1 Si 0.06461(15) 0.38014(12) 0.23125(8) 0.0194(3) Uani 1 1 d . . . 
Si2 Si 0.00266(14) -0.12092(12) 0.34226(8) 0.0167(3) Uani 1 1 d . . . 
O1 O -0.1515(3) 0.2579(3) 0.37173(19) 0.0189(7) Uani 1 1 d . . . 
N1 N 0.1196(4) 0.2616(3) 0.2476(2) 0.0163(8) Uani 1 1 d . . . 
N2 N 0.0837(4) -0.0316(3) 0.2996(2) 0.0156(8) Uani 1 1 d . . . 
C1 C 0.2889(5) 0.1307(4) 0.2890(3) 0.0144(9) Uani 1 1 d . . . 
H1 H 0.3604 0.1633 0.3329 0.017 Uiso 1 1 calc R . . 
C2 C 0.2975(5) 0.1718(4) 0.1519(3) 0.0146(9) Uani 1 1 d . . . 
C3 C 0.1854(6) 0.1378(4) 0.0961(3) 0.0198(10) Uani 1 1 d . . . 
H3 H 0.0934 0.1424 0.1053 0.024 Uiso 1 1 calc R . . 
C4 C 0.2093(6) 0.0974(5) 0.0274(3) 0.0249(11) Uani 1 1 d . . . 
H4 H 0.1329 0.0731 -0.0106 0.030 Uiso 1 1 calc R . . 
C5 C 0.3423(6) 0.0919(5) 0.0131(3) 0.0254(12) Uani 1 1 d . . . 
H5 H 0.3573 0.0660 -0.0345 0.030 Uiso 1 1 calc R . . 
C6 C 0.4545(6) 0.1241(4) 0.0682(3) 0.0222(11) Uani 1 1 d . . . 
H6 H 0.5463 0.1207 0.0583 0.027 Uiso 1 1 calc R . . 
C7 C 0.4321(5) 0.1613(4) 0.1377(3) 0.0176(10) Uani 1 1 d . . . 
H7 H 0.5078 0.1796 0.1756 0.021 Uiso 1 1 calc R . . 
C8 C 0.4110(5) 0.3518(4) 0.2842(3) 0.0157(9) Uani 1 1 d . . . 
C9 C 0.4905(5) 0.4043(4) 0.2441(3) 0.0168(10) Uani 1 1 d . . . 
H9 H 0.4728 0.3749 0.1939 0.020 Uiso 1 1 calc R . . 
C10 C 0.5960(5) 0.4999(4) 0.2776(3) 0.0204(10) Uani 1 1 d . . . 
H10 H 0.6495 0.5356 0.2502 0.025 Uiso 1 1 calc R . . 
C11 C 0.6223(5) 0.5423(4) 0.3508(3) 0.0189(10) Uani 1 1 d . . . 
H11 H 0.6961 0.6054 0.3738 0.023 Uiso 1 1 calc R . . 
C12 C 0.5398(5) 0.4919(4) 0.3904(3) 0.0205(10) Uani 1 1 d . . . 
H12 H 0.5556 0.5230 0.4406 0.025 Uiso 1 1 calc R . . 
C13 C 0.4358(5) 0.3976(4) 0.3579(3) 0.0184(10) Uani 1 1 d . . . 
H13 H 0.3809 0.3638 0.3855 0.022 Uiso 1 1 calc R . . 
C14 C 0.3538(5) -0.0789(4) 0.3119(3) 0.0147(9) Uani 1 1 d . . . 
C15 C 0.3563(6) -0.1935(4) 0.2825(3) 0.0221(11) Uani 1 1 d . . . 
H15 H 0.3008 -0.2355 0.2380 0.027 Uiso 1 1 calc R . . 
C16 C 0.4400(6) -0.2470(5) 0.3182(3) 0.0249(11) Uani 1 1 d . . . 
H16 H 0.4418 -0.3255 0.2977 0.030 Uiso 1 1 calc R . . 
C17 C 0.5204(5) -0.1874(5) 0.3830(3) 0.0235(11) Uani 1 1 d . . . 
H17 H 0.5759 -0.2250 0.4075 0.028 Uiso 1 1 calc R . . 
C18 C 0.5198(5) -0.0721(5) 0.4121(3) 0.0209(11) Uani 1 1 d . . . 
H18 H 0.5768 -0.0302 0.4563 0.025 Uiso 1 1 calc R . . 
C19 C 0.4375(5) -0.0181(4) 0.3776(3) 0.0177(10) Uani 1 1 d . . . 
H19 H 0.4370 0.0607 0.3981 0.021 Uiso 1 1 calc R . . 
C20 C 0.2086(5) -0.0880(4) 0.1772(3) 0.0159(9) Uani 1 1 d . . . 
C21 C 0.0756(5) -0.1382(4) 0.1379(3) 0.0203(10) Uani 1 1 d . . . 
H21 H -0.0046 -0.1329 0.1602 0.024 Uiso 1 1 calc R . . 
C22 C 0.0618(6) -0.1960(5) 0.0661(3) 0.0246(11) Uani 1 1 d . . . 
H22 H -0.0281 -0.2309 0.0393 0.030 Uiso 1 1 calc R . . 
C23 C 0.1785(6) -0.2030(5) 0.0333(3) 0.0254(12) Uani 1 1 d . . . 
H23 H 0.1683 -0.2414 -0.0160 0.031 Uiso 1 1 calc R . . 
C24 C 0.3105(6) -0.1538(4) 0.0726(3) 0.0239(11) Uani 1 1 d . . . 
H24 H 0.3903 -0.1598 0.0501 0.029 Uiso 1 1 calc R . . 
C25 C 0.3267(5) -0.0963(4) 0.1442(3) 0.0194(10) Uani 1 1 d . . . 
H25 H 0.4172 -0.0626 0.1707 0.023 Uiso 1 1 calc R . . 
C26 C 0.1229(7) 0.5055(5) 0.3124(3) 0.0328(14) Uani 1 1 d . . . 
H26A H 0.0886 0.4867 0.3527 0.049 Uiso 1 1 calc R . . 
H26B H 0.0857 0.5710 0.3052 0.049 Uiso 1 1 calc R . . 
H26C H 0.2250 0.5248 0.3219 0.049 Uiso 1 1 calc R . . 
C27 C -0.1294(5) 0.3488(5) 0.2096(3) 0.0296(13) Uani 1 1 d . . . 
H27A H -0.1599 0.2819 0.1676 0.044 Uiso 1 1 calc R . . 
H27B H -0.1616 0.4149 0.2003 0.044 Uiso 1 1 calc R . . 
H27C H -0.1688 0.3333 0.2497 0.044 Uiso 1 1 calc R . . 
C28 C 0.1368(6) 0.4190(5) 0.1569(3) 0.0296(13) Uani 1 1 d . . . 
H28A H 0.2386 0.4286 0.1655 0.044 Uiso 1 1 calc R . . 
H28B H 0.1109 0.4906 0.1537 0.044 Uiso 1 1 calc R . . 
H28C H 0.0988 0.3581 0.1124 0.044 Uiso 1 1 calc R . . 
C29 C -0.1279(5) -0.0433(5) 0.3856(3) 0.0252(12) Uani 1 1 d . . . 
H29A H -0.0809 0.0330 0.4160 0.038 Uiso 1 1 calc R . . 
H29B H -0.1727 -0.0860 0.4143 0.038 Uiso 1 1 calc R . . 
H29C H -0.1986 -0.0362 0.3492 0.038 Uiso 1 1 calc R . . 
C30 C -0.0895(6) -0.2604(5) 0.2792(3) 0.0292(13) Uani 1 1 d . . . 
H30A H -0.1668 -0.2484 0.2484 0.044 Uiso 1 1 calc R . . 
H30B H -0.1259 -0.3109 0.3056 0.044 Uiso 1 1 calc R . . 
H30C H -0.0243 -0.2955 0.2503 0.044 Uiso 1 1 calc R . . 
C31 C 0.1244(5) -0.1447(5) 0.4133(3) 0.0228(11) Uani 1 1 d . . . 
H31A H 0.1907 -0.1896 0.3918 0.034 Uiso 1 1 calc R . . 
H31B H 0.0710 -0.1862 0.4400 0.034 Uiso 1 1 calc R . . 
H31C H 0.1754 -0.0708 0.4453 0.034 Uiso 1 1 calc R . . 
C32 C -0.2992(5) 0.2163(5) 0.3710(3) 0.0237(11) Uani 1 1 d . . . 
H32A H -0.3224 0.1318 0.3536 0.028 Uiso 1 1 calc R . . 
H32B H -0.3589 0.2470 0.3404 0.028 Uiso 1 1 calc R . . 
C33 C -0.3185(6) 0.2606(5) 0.4482(3) 0.0260(12) Uani 1 1 d . . . 
H33A H -0.3090 0.2024 0.4727 0.031 Uiso 1 1 calc R . . 
H33B H -0.4110 0.2817 0.4516 0.031 Uiso 1 1 calc R . . 
C34 C -0.2007(6) 0.3666(5) 0.4801(3) 0.0270(12) Uani 1 1 d . . . 
H34A H -0.2396 0.4362 0.4980 0.032 Uiso 1 1 calc R . . 
H34B H -0.1380 0.3571 0.5196 0.032 Uiso 1 1 calc R . . 
C35 C -0.1225(6) 0.3745(4) 0.4193(3) 0.0235(11) Uani 1 1 d . . . 
H35A H -0.1574 0.4271 0.3954 0.028 Uiso 1 1 calc R . . 
H35B H -0.0212 0.4017 0.4366 0.028 Uiso 1 1 calc R . . 
C36 C -0.1539(7) 0.5238(6) 0.0554(4) 0.0469(18) Uani 1 1 d . . . 
H36A H -0.1346 0.4532 0.0639 0.070 Uiso 1 1 calc R . . 
H36B H -0.0792 0.5880 0.0829 0.070 Uiso 1 1 calc R . . 
H36C H -0.1587 0.5160 0.0049 0.070 Uiso 1 1 calc R . . 
C37 C -0.2905(6) 0.5455(5) 0.0777(3) 0.0310(13) Uani 1 1 d . . . 
C38 C -0.4021(6) 0.4541(5) 0.0675(3) 0.0289(12) Uani 1 1 d . . . 
H38 H -0.3889 0.3780 0.0486 0.035 Uiso 1 1 calc R . . 
C39 C -0.5319(7) 0.4729(5) 0.0844(3) 0.0304(13) Uani 1 1 d . . . 
H39 H -0.6068 0.4103 0.0762 0.037 Uiso 1 1 calc R . . 
C40 C -0.5506(7) 0.5839(5) 0.1133(3) 0.0328(13) Uani 1 1 d . . . 
H40 H -0.6384 0.5979 0.1254 0.039 Uiso 1 1 calc R . . 
C41 C -0.4407(6) 0.6743(5) 0.1245(3) 0.0327(13) Uani 1 1 d . . . 
H41 H -0.4531 0.7502 0.1451 0.039 Uiso 1 1 calc R . . 
C42 C -0.3121(6) 0.6556(5) 0.1060(3) 0.0299(13) Uani 1 1 d . . . 
H42 H -0.2387 0.7189 0.1129 0.036 Uiso 1 1 calc R . . 
 
loop_ 
 _atom_site_aniso_label 
 _atom_site_aniso_U_11 
 _atom_site_aniso_U_22 
 _atom_site_aniso_U_33 
 _atom_site_aniso_U_23 
 _atom_site_aniso_U_13 
 _atom_site_aniso_U_12 
Nd1 0.01186(12) 0.01388(12) 0.01393(13) 0.00383(10) 0.00209(9) 0.00268(9) 
I1 0.01670(16) 0.02356(17) 0.02090(17) 0.00090(14) -0.00317(13) 0.00364(13) 
I2 0.01911(16) 0.02456(17) 0.01386(16) 0.00460(13) 0.00072(12) 0.00081(13) 
P1 0.0127(5) 0.0130(6) 0.0136(6) 0.0045(5) 0.0021(4) 0.0024(4) 
P2 0.0128(5) 0.0133(6) 0.0126(6) 0.0043(5) 0.0019(4) 0.0026(4) 
Si1 0.0183(7) 0.0190(7) 0.0259(8) 0.0118(6) 0.0062(6) 0.0073(6) 
Si2 0.0147(6) 0.0165(6) 0.0195(7) 0.0074(6) 0.0029(5) 0.0009(5) 
O1 0.0151(17) 0.0182(17) 0.0207(19) -0.0004(15) 0.0044(14) 0.0056(14) 
N1 0.0149(19) 0.017(2) 0.018(2) 0.0064(17) 0.0036(16) 0.0040(16) 
N2 0.0154(19) 0.016(2) 0.016(2) 0.0065(17) 0.0029(16) 0.0030(16) 
C1 0.014(2) 0.016(2) 0.014(2) 0.0063(19) 0.0003(18) 0.0031(18) 
C2 0.022(2) 0.010(2) 0.014(2) 0.0053(18) 0.0045(19) 0.0048(18) 
C3 0.026(3) 0.018(2) 0.018(3) 0.007(2) 0.003(2) 0.008(2) 
C4 0.035(3) 0.023(3) 0.014(2) 0.002(2) -0.002(2) 0.007(2) 
C5 0.039(3) 0.021(3) 0.018(3) 0.005(2) 0.009(2) 0.010(2) 
C6 0.025(3) 0.022(3) 0.022(3) 0.008(2) 0.010(2) 0.007(2) 
C7 0.019(2) 0.018(2) 0.015(2) 0.0037(19) 0.0025(19) 0.0045(19) 
C8 0.014(2) 0.016(2) 0.019(2) 0.0078(19) 0.0029(19) 0.0042(18) 
C9 0.016(2) 0.016(2) 0.018(2) 0.005(2) 0.0022(19) 0.0034(19) 
C10 0.018(2) 0.019(2) 0.026(3) 0.008(2) 0.005(2) 0.005(2) 
C11 0.016(2) 0.013(2) 0.026(3) 0.005(2) 0.000(2) 0.0035(19) 
C12 0.025(3) 0.013(2) 0.020(3) 0.002(2) -0.001(2) 0.004(2) 
C13 0.022(2) 0.016(2) 0.019(3) 0.007(2) 0.002(2) 0.005(2) 
C14 0.011(2) 0.016(2) 0.018(2) 0.0058(19) 0.0037(18) 0.0033(18) 
C15 0.029(3) 0.017(2) 0.018(3) 0.002(2) 0.000(2) 0.005(2) 
C16 0.025(3) 0.021(3) 0.032(3) 0.011(2) 0.005(2) 0.009(2) 
C17 0.018(2) 0.029(3) 0.029(3) 0.016(2) 0.001(2) 0.010(2) 
C18 0.014(2) 0.029(3) 0.020(3) 0.010(2) -0.0009(19) 0.004(2) 
C19 0.016(2) 0.019(2) 0.017(2) 0.006(2) -0.0009(19) 0.0012(19) 
C20 0.020(2) 0.012(2) 0.015(2) 0.0038(18) 0.0016(19) 0.0031(19) 
C21 0.020(2) 0.021(3) 0.018(3) 0.005(2) 0.001(2) 0.003(2) 
C22 0.025(3) 0.023(3) 0.022(3) 0.005(2) -0.005(2) 0.002(2) 
C23 0.035(3) 0.020(3) 0.018(3) 0.002(2) 0.004(2) 0.004(2) 
C24 0.031(3) 0.019(3) 0.024(3) 0.007(2) 0.014(2) 0.004(2) 
C25 0.019(2) 0.018(2) 0.023(3) 0.010(2) 0.003(2) 0.002(2) 
C26 0.039(3) 0.021(3) 0.040(4) 0.009(3) 0.007(3) 0.011(3) 
C27 0.020(3) 0.031(3) 0.047(4) 0.020(3) 0.010(3) 0.013(2) 
C28 0.023(3) 0.037(3) 0.041(4) 0.026(3) 0.011(3) 0.012(2) 
C29 0.020(3) 0.034(3) 0.026(3) 0.015(2) 0.008(2) 0.006(2) 
C30 0.025(3) 0.023(3) 0.037(3) 0.012(3) -0.004(2) -0.004(2) 
C31 0.019(2) 0.027(3) 0.028(3) 0.016(2) 0.006(2) 0.007(2) 
C32 0.014(2) 0.032(3) 0.024(3) 0.005(2) 0.007(2) 0.005(2) 
C33 0.028(3) 0.033(3) 0.019(3) 0.009(2) 0.007(2) 0.009(2) 
C34 0.028(3) 0.028(3) 0.023(3) 0.003(2) 0.003(2) 0.008(2) 
C35 0.024(3) 0.017(2) 0.029(3) 0.004(2) 0.006(2) 0.008(2) 
C36 0.036(4) 0.037(4) 0.069(5) 0.014(4) 0.012(4) 0.013(3) 
C37 0.029(3) 0.032(3) 0.032(3) 0.011(3) 0.000(3) 0.005(2) 
C38 0.036(3) 0.021(3) 0.030(3) 0.009(2) 0.003(3) 0.006(2) 
C39 0.039(3) 0.031(3) 0.019(3) 0.010(2) 0.003(2) -0.002(3) 
C40 0.034(3) 0.039(3) 0.027(3) 0.013(3) 0.008(3) 0.005(3) 
C41 0.036(3) 0.030(3) 0.031(3) 0.006(3) 0.008(3) 0.008(3) 
C42 0.028(3) 0.024(3) 0.030(3) 0.002(2) -0.003(2) -0.003(2) 
 
_geom_special_details 
; 
 All esds (except the esd in the dihedral angle between two l.s. planes) 
 are estimated using the full covariance matrix.  The cell esds are taken 
 into account individually in the estimation of esds in distances, angles 
 and torsion angles; correlations between esds in cell parameters are only 
 used when they are defined by crystal symmetry.  An approximate (isotropic) 
 treatment of cell esds is used for estimating esds involving l.s. planes. 
; 
 
loop_ 
 _geom_bond_atom_site_label_1 
 _geom_bond_atom_site_label_2 
 _geom_bond_distance 
 _geom_bond_site_symmetry_2 
 _geom_bond_publ_flag 
Nd1 N2 2.356(4) . ? 
Nd1 N1 2.396(4) . ? 
Nd1 O1 2.497(3) . ? 
Nd1 C1 2.786(5) . ? 
Nd1 I1 3.1203(6) . ? 
Nd1 I2 3.1387(7) . ? 
P1 N1 1.621(4) . ? 
P1 C1 1.725(5) . ? 
P1 C2 1.808(5) . ? 
P1 C8 1.827(5) . ? 
P2 N2 1.610(4) . ? 
P2 C1 1.728(5) . ? 
P2 C20 1.801(5) . ? 
P2 C14 1.810(5) . ? 
Si1 N1 1.745(4) . ? 
Si1 C28 1.863(6) . ? 
Si1 C26 1.864(6) . ? 
Si1 C27 1.864(6) . ? 
Si2 N2 1.734(4) . ? 
Si2 C30 1.855(6) . ? 
Si2 C29 1.867(5) . ? 
Si2 C31 1.868(5) . ? 
O1 C35 1.456(6) . ? 
O1 C32 1.463(6) . ? 
C1 H1 1.0000 . ? 
C2 C3 1.397(7) . ? 
C2 C7 1.403(7) . ? 
C3 C4 1.381(7) . ? 
C3 H3 0.9500 . ? 
C4 C5 1.378(8) . ? 
C4 H4 0.9500 . ? 
C5 C6 1.390(8) . ? 
C5 H5 0.9500 . ? 
C6 C7 1.387(7) . ? 
C6 H6 0.9500 . ? 
C7 H7 0.9500 . ? 
C8 C13 1.397(7) . ? 
C8 C9 1.398(7) . ? 
C9 C10 1.398(7) . ? 
C9 H9 0.9500 . ? 
C10 C11 1.384(7) . ? 
C10 H10 0.9500 . ? 
C11 C12 1.395(7) . ? 
C11 H11 0.9500 . ? 
C12 C13 1.377(7) . ? 
C12 H12 0.9500 . ? 
C13 H13 0.9500 . ? 
C14 C15 1.384(7) . ? 
C14 C19 1.405(7) . ? 
C15 C16 1.388(7) . ? 
C15 H15 0.9500 . ? 
C16 C17 1.377(8) . ? 
C16 H16 0.9500 . ? 
C17 C18 1.388(8) . ? 
C17 H17 0.9500 . ? 
C18 C19 1.372(7) . ? 
C18 H18 0.9500 . ? 
C19 H19 0.9500 . ? 
C20 C21 1.399(7) . ? 
C20 C25 1.402(7) . ? 
C21 C22 1.391(7) . ? 
C21 H21 0.9500 . ? 
C22 C23 1.386(8) . ? 
C22 H22 0.9500 . ? 
C23 C24 1.390(8) . ? 
C23 H23 0.9500 . ? 
C24 C25 1.384(7) . ? 
C24 H24 0.9500 . ? 
C25 H25 0.9500 . ? 
C26 H26A 0.9800 . ? 
C26 H26B 0.9800 . ? 
C26 H26C 0.9800 . ? 
C27 H27A 0.9800 . ? 
C27 H27B 0.9800 . ? 
C27 H27C 0.9800 . ? 
C28 H28A 0.9800 . ? 
C28 H28B 0.9800 . ? 
C28 H28C 0.9800 . ? 
C29 H29A 0.9800 . ? 
C29 H29B 0.9800 . ? 
C29 H29C 0.9800 . ? 
C30 H30A 0.9800 . ? 
C30 H30B 0.9800 . ? 
C30 H30C 0.9800 . ? 
C31 H31A 0.9800 . ? 
C31 H31B 0.9800 . ? 
C31 H31C 0.9800 . ? 
C32 C33 1.527(7) . ? 
C32 H32A 0.9900 . ? 
C32 H32B 0.9900 . ? 
C33 C34 1.542(8) . ? 
C33 H33A 0.9900 . ? 
C33 H33B 0.9900 . ? 
C34 C35 1.525(7) . ? 
C34 H34A 0.9900 . ? 
C34 H34B 0.9900 . ? 
C35 H35A 0.9900 . ? 
C35 H35B 0.9900 . ? 
C36 C37 1.502(9) . ? 
C36 H36A 0.9800 . ? 
C36 H36B 0.9800 . ? 
C36 H36C 0.9800 . ? 
C37 C42 1.385(8) . ? 
C37 C38 1.405(8) . ? 
C38 C39 1.394(8) . ? 
C38 H38 0.9500 . ? 
C39 C40 1.387(9) . ? 
C39 H39 0.9500 . ? 
C40 C41 1.384(8) . ? 
C40 H40 0.9500 . ? 
C41 C42 1.391(8) . ? 
C41 H41 0.9500 . ? 
C42 H42 0.9500 . ? 
 
loop_ 
 _geom_angle_atom_site_label_1 
 _geom_angle_atom_site_label_2 
 _geom_angle_atom_site_label_3 
 _geom_angle 
 _geom_angle_site_symmetry_1 
 _geom_angle_site_symmetry_3 
 _geom_angle_publ_flag 
N2 Nd1 N1 116.28(14) . . ? 
N2 Nd1 O1 139.64(13) . . ? 
N1 Nd1 O1 103.50(13) . . ? 
N2 Nd1 C1 62.64(14) . . ? 
N1 Nd1 C1 62.66(14) . . ? 
O1 Nd1 C1 151.54(13) . . ? 
N2 Nd1 I1 87.19(10) . . ? 
N1 Nd1 I1 93.96(10) . . ? 
O1 Nd1 I1 83.43(8) . . ? 
C1 Nd1 I1 120.50(10) . . ? 
N2 Nd1 I2 93.52(10) . . ? 
N1 Nd1 I2 106.92(10) . . ? 
O1 Nd1 I2 80.67(8) . . ? 
C1 Nd1 I2 80.28(10) . . ? 
I1 Nd1 I2 156.167(13) . . ? 
N1 P1 C1 108.4(2) . . ? 
N1 P1 C2 112.1(2) . . ? 
C1 P1 C2 111.9(2) . . ? 
N1 P1 C8 111.0(2) . . ? 
C1 P1 C8 107.1(2) . . ? 
C2 P1 C8 106.2(2) . . ? 
N2 P2 C1 107.8(2) . . ? 
N2 P2 C20 111.3(2) . . ? 
C1 P2 C20 111.6(2) . . ? 
N2 P2 C14 110.2(2) . . ? 
C1 P2 C14 111.1(2) . . ? 
C20 P2 C14 104.9(2) . . ? 
N1 Si1 C28 113.3(2) . . ? 
N1 Si1 C26 108.8(2) . . ? 
C28 Si1 C26 107.7(3) . . ? 
N1 Si1 C27 108.7(2) . . ? 
C28 Si1 C27 108.6(3) . . ? 
C26 Si1 C27 109.6(3) . . ? 
N2 Si2 C30 112.0(2) . . ? 
N2 Si2 C29 104.9(2) . . ? 
C30 Si2 C29 109.1(3) . . ? 
N2 Si2 C31 113.1(2) . . ? 
C30 Si2 C31 109.9(3) . . ? 
C29 Si2 C31 107.7(2) . . ? 
C35 O1 C32 104.5(4) . . ? 
C35 O1 Nd1 127.3(3) . . ? 
C32 O1 Nd1 127.9(3) . . ? 
P1 N1 Si1 127.6(3) . . ? 
P1 N1 Nd1 102.78(19) . . ? 
Si1 N1 Nd1 127.2(2) . . ? 
P2 N2 Si2 136.5(3) . . ? 
P2 N2 Nd1 102.49(19) . . ? 
Si2 N2 Nd1 117.5(2) . . ? 
P1 C1 P2 134.0(3) . . ? 
P1 C1 Nd1 86.11(18) . . ? 
P2 C1 Nd1 84.26(18) . . ? 
P1 C1 H1 112.6 . . ? 
P2 C1 H1 112.6 . . ? 
Nd1 C1 H1 112.6 . . ? 
C3 C2 C7 119.7(4) . . ? 
C3 C2 P1 120.9(4) . . ? 
C7 C2 P1 119.4(4) . . ? 
C4 C3 C2 119.4(5) . . ? 
C4 C3 H3 120.3 . . ? 
C2 C3 H3 120.3 . . ? 
C5 C4 C3 120.9(5) . . ? 
C5 C4 H4 119.5 . . ? 
C3 C4 H4 119.5 . . ? 
C4 C5 C6 120.2(5) . . ? 
C4 C5 H5 119.9 . . ? 
C6 C5 H5 119.9 . . ? 
C7 C6 C5 119.7(5) . . ? 
C7 C6 H6 120.1 . . ? 
C5 C6 H6 120.1 . . ? 
C6 C7 C2 119.9(5) . . ? 
C6 C7 H7 120.0 . . ? 
C2 C7 H7 120.0 . . ? 
C13 C8 C9 119.2(5) . . ? 
C13 C8 P1 118.9(4) . . ? 
C9 C8 P1 121.8(4) . . ? 
C10 C9 C8 120.4(5) . . ? 
C10 C9 H9 119.8 . . ? 
C8 C9 H9 119.8 . . ? 
C11 C10 C9 119.8(5) . . ? 
C11 C10 H10 120.1 . . ? 
C9 C10 H10 120.1 . . ? 
C10 C11 C12 119.7(5) . . ? 
C10 C11 H11 120.2 . . ? 
C12 C11 H11 120.2 . . ? 
C13 C12 C11 120.8(5) . . ? 
C13 C12 H12 119.6 . . ? 
C11 C12 H12 119.6 . . ? 
C12 C13 C8 120.0(5) . . ? 
C12 C13 H13 120.0 . . ? 
C8 C13 H13 120.0 . . ? 
C15 C14 C19 119.2(5) . . ? 
C15 C14 P2 119.5(4) . . ? 
C19 C14 P2 120.9(4) . . ? 
C14 C15 C16 119.9(5) . . ? 
C14 C15 H15 120.0 . . ? 
C16 C15 H15 120.0 . . ? 
C17 C16 C15 120.7(5) . . ? 
C17 C16 H16 119.6 . . ? 
C15 C16 H16 119.6 . . ? 
C16 C17 C18 119.5(5) . . ? 
C16 C17 H17 120.2 . . ? 
C18 C17 H17 120.2 . . ? 
C19 C18 C17 120.4(5) . . ? 
C19 C18 H18 119.8 . . ? 
C17 C18 H18 119.8 . . ? 
C18 C19 C14 120.2(5) . . ? 
C18 C19 H19 119.9 . . ? 
C14 C19 H19 119.9 . . ? 
C21 C20 C25 120.1(5) . . ? 
C21 C20 P2 120.2(4) . . ? 
C25 C20 P2 119.7(4) . . ? 
C22 C21 C20 119.5(5) . . ? 
C22 C21 H21 120.3 . . ? 
C20 C21 H21 120.3 . . ? 
C23 C22 C21 120.4(5) . . ? 
C23 C22 H22 119.8 . . ? 
C21 C22 H22 119.8 . . ? 
C22 C23 C24 119.9(5) . . ? 
C22 C23 H23 120.0 . . ? 
C24 C23 H23 120.0 . . ? 
C25 C24 C23 120.6(5) . . ? 
C25 C24 H24 119.7 . . ? 
C23 C24 H24 119.7 . . ? 
C24 C25 C20 119.4(5) . . ? 
C24 C25 H25 120.3 . . ? 
C20 C25 H25 120.3 . . ? 
Si1 C26 H26A 109.5 . . ? 
Si1 C26 H26B 109.5 . . ? 
H26A C26 H26B 109.5 . . ? 
Si1 C26 H26C 109.5 . . ? 
H26A C26 H26C 109.5 . . ? 
H26B C26 H26C 109.5 . . ? 
Si1 C27 H27A 109.5 . . ? 
Si1 C27 H27B 109.5 . . ? 
H27A C27 H27B 109.5 . . ? 
Si1 C27 H27C 109.5 . . ? 
H27A C27 H27C 109.5 . . ? 
H27B C27 H27C 109.5 . . ? 
Si1 C28 H28A 109.5 . . ? 
Si1 C28 H28B 109.5 . . ? 
H28A C28 H28B 109.5 . . ? 
Si1 C28 H28C 109.5 . . ? 
H28A C28 H28C 109.5 . . ? 
H28B C28 H28C 109.5 . . ? 
Si2 C29 H29A 109.5 . . ? 
Si2 C29 H29B 109.5 . . ? 
H29A C29 H29B 109.5 . . ? 
Si2 C29 H29C 109.5 . . ? 
H29A C29 H29C 109.5 . . ? 
H29B C29 H29C 109.5 . . ? 
Si2 C30 H30A 109.5 . . ? 
Si2 C30 H30B 109.5 . . ? 
H30A C30 H30B 109.5 . . ? 
Si2 C30 H30C 109.5 . . ? 
H30A C30 H30C 109.5 . . ? 
H30B C30 H30C 109.5 . . ? 
Si2 C31 H31A 109.5 . . ? 
Si2 C31 H31B 109.5 . . ? 
H31A C31 H31B 109.5 . . ? 
Si2 C31 H31C 109.5 . . ? 
H31A C31 H31C 109.5 . . ? 
H31B C31 H31C 109.5 . . ? 
O1 C32 C33 104.3(4) . . ? 
O1 C32 H32A 110.9 . . ? 
C33 C32 H32A 110.9 . . ? 
O1 C32 H32B 110.9 . . ? 
C33 C32 H32B 110.9 . . ? 
H32A C32 H32B 108.9 . . ? 
C32 C33 C34 104.0(4) . . ? 
C32 C33 H33A 111.0 . . ? 
C34 C33 H33A 111.0 . . ? 
C32 C33 H33B 111.0 . . ? 
C34 C33 H33B 111.0 . . ? 
H33A C33 H33B 109.0 . . ? 
C35 C34 C33 105.1(4) . . ? 
C35 C34 H34A 110.7 . . ? 
C33 C34 H34A 110.7 . . ? 
C35 C34 H34B 110.7 . . ? 
C33 C34 H34B 110.7 . . ? 
H34A C34 H34B 108.8 . . ? 
O1 C35 C34 104.0(4) . . ? 
O1 C35 H35A 111.0 . . ? 
C34 C35 H35A 111.0 . . ? 
O1 C35 H35B 111.0 . . ? 
C34 C35 H35B 111.0 . . ? 
H35A C35 H35B 109.0 . . ? 
C37 C36 H36A 109.5 . . ? 
C37 C36 H36B 109.5 . . ? 
H36A C36 H36B 109.5 . . ? 
C37 C36 H36C 109.5 . . ? 
H36A C36 H36C 109.5 . . ? 
H36B C36 H36C 109.5 . . ? 
C42 C37 C38 118.1(6) . . ? 
C42 C37 C36 121.2(6) . . ? 
C38 C37 C36 120.6(6) . . ? 
C39 C38 C37 121.4(5) . . ? 
C39 C38 H38 119.3 . . ? 
C37 C38 H38 119.3 . . ? 
C40 C39 C38 119.4(6) . . ? 
C40 C39 H39 120.3 . . ? 
C38 C39 H39 120.3 . . ? 
C41 C40 C39 119.6(6) . . ? 
C41 C40 H40 120.2 . . ? 
C39 C40 H40 120.2 . . ? 
C40 C41 C42 121.0(6) . . ? 
C40 C41 H41 119.5 . . ? 
C42 C41 H41 119.5 . . ? 
C37 C42 C41 120.5(5) . . ? 
C37 C42 H42 119.8 . . ? 
C41 C42 H42 119.8 . . ? 
 
loop_ 
 _geom_torsion_atom_site_label_1 
 _geom_torsion_atom_site_label_2 
 _geom_torsion_atom_site_label_3 
 _geom_torsion_atom_site_label_4 
 _geom_torsion 
 _geom_torsion_site_symmetry_1 
 _geom_torsion_site_symmetry_2 
 _geom_torsion_site_symmetry_3 
 _geom_torsion_site_symmetry_4 
 _geom_torsion_publ_flag 
N2 Nd1 O1 C35 130.2(4) . . . . ? 
N1 Nd1 O1 C35 -59.5(4) . . . . ? 
C1 Nd1 O1 C35 -2.7(5) . . . . ? 
I1 Nd1 O1 C35 -152.0(4) . . . . ? 
I2 Nd1 O1 C35 45.8(4) . . . . ? 
N2 Nd1 O1 C32 -42.3(5) . . . . ? 
N1 Nd1 O1 C32 128.0(4) . . . . ? 
C1 Nd1 O1 C32 -175.2(4) . . . . ? 
I1 Nd1 O1 C32 35.5(4) . . . . ? 
I2 Nd1 O1 C32 -126.7(4) . . . . ? 
C1 P1 N1 Si1 161.8(3) . . . . ? 
C2 P1 N1 Si1 -74.2(4) . . . . ? 
C8 P1 N1 Si1 44.4(4) . . . . ? 
C1 P1 N1 Nd1 -1.4(3) . . . . ? 
C2 P1 N1 Nd1 122.6(2) . . . . ? 
C8 P1 N1 Nd1 -118.8(2) . . . . ? 
C28 Si1 N1 P1 36.8(4) . . . . ? 
C26 Si1 N1 P1 -82.9(4) . . . . ? 
C27 Si1 N1 P1 157.7(3) . . . . ? 
C28 Si1 N1 Nd1 -163.9(3) . . . . ? 
C26 Si1 N1 Nd1 76.4(3) . . . . ? 
C27 Si1 N1 Nd1 -43.0(4) . . . . ? 
N2 Nd1 N1 P1 -32.7(2) . . . . ? 
O1 Nd1 N1 P1 154.27(18) . . . . ? 
C1 Nd1 N1 P1 0.93(17) . . . . ? 
I1 Nd1 N1 P1 -121.54(17) . . . . ? 
I2 Nd1 N1 P1 70.09(19) . . . . ? 
N2 Nd1 N1 Si1 164.0(2) . . . . ? 
O1 Nd1 N1 Si1 -9.0(3) . . . . ? 
C1 Nd1 N1 Si1 -162.4(3) . . . . ? 
I1 Nd1 N1 Si1 75.1(3) . . . . ? 
I2 Nd1 N1 Si1 -93.2(3) . . . . ? 
C1 P2 N2 Si2 -140.3(4) . . . . ? 
C20 P2 N2 Si2 96.9(4) . . . . ? 
C14 P2 N2 Si2 -18.9(4) . . . . ? 
C1 P2 N2 Nd1 16.8(2) . . . . ? 
C20 P2 N2 Nd1 -105.9(2) . . . . ? 
C14 P2 N2 Nd1 138.2(2) . . . . ? 
C30 Si2 N2 P2 -83.4(4) . . . . ? 
C29 Si2 N2 P2 158.5(4) . . . . ? 
C31 Si2 N2 P2 41.5(5) . . . . ? 
C30 Si2 N2 Nd1 122.0(3) . . . . ? 
C29 Si2 N2 Nd1 3.8(3) . . . . ? 
C31 Si2 N2 Nd1 -113.2(3) . . . . ? 
N1 Nd1 N2 P2 22.6(2) . . . . ? 
O1 Nd1 N2 P2 -167.95(15) . . . . ? 
C1 Nd1 N2 P2 -11.08(17) . . . . ? 
I1 Nd1 N2 P2 115.62(18) . . . . ? 
I2 Nd1 N2 P2 -88.24(18) . . . . ? 
N1 Nd1 N2 Si2 -174.96(19) . . . . ? 
O1 Nd1 N2 Si2 -5.5(3) . . . . ? 
C1 Nd1 N2 Si2 151.4(3) . . . . ? 
I1 Nd1 N2 Si2 -81.9(2) . . . . ? 
I2 Nd1 N2 Si2 74.2(2) . . . . ? 
N1 P1 C1 P2 79.4(4) . . . . ? 
C2 P1 C1 P2 -44.7(4) . . . . ? 
C8 P1 C1 P2 -160.8(4) . . . . ? 
N1 P1 C1 Nd1 1.2(2) . . . . ? 
C2 P1 C1 Nd1 -122.91(19) . . . . ? 
C8 P1 C1 Nd1 121.07(18) . . . . ? 
N2 P2 C1 P1 -92.8(4) . . . . ? 
C20 P2 C1 P1 29.7(5) . . . . ? 
C14 P2 C1 P1 146.4(4) . . . . ? 
N2 P2 C1 Nd1 -13.9(2) . . . . ? 
C20 P2 C1 Nd1 108.6(2) . . . . ? 
C14 P2 C1 Nd1 -134.68(18) . . . . ? 
N2 Nd1 C1 P1 145.1(2) . . . . ? 
N1 Nd1 C1 P1 -0.86(16) . . . . ? 
O1 Nd1 C1 P1 -67.1(3) . . . . ? 
I1 Nd1 C1 P1 76.77(18) . . . . ? 
I2 Nd1 C1 P1 -115.75(17) . . . . ? 
N2 Nd1 C1 P2 10.12(15) . . . . ? 
N1 Nd1 C1 P2 -135.9(2) . . . . ? 
O1 Nd1 C1 P2 157.87(19) . . . . ? 
I1 Nd1 C1 P2 -58.23(19) . . . . ? 
I2 Nd1 C1 P2 109.25(16) . . . . ? 
N1 P1 C2 C3 -14.7(5) . . . . ? 
C1 P1 C2 C3 107.3(4) . . . . ? 
C8 P1 C2 C3 -136.2(4) . . . . ? 
N1 P1 C2 C7 166.3(4) . . . . ? 
C1 P1 C2 C7 -71.7(4) . . . . ? 
C8 P1 C2 C7 44.9(4) . . . . ? 
C7 C2 C3 C4 -2.0(7) . . . . ? 
P1 C2 C3 C4 179.1(4) . . . . ? 
C2 C3 C4 C5 -1.0(8) . . . . ? 
C3 C4 C5 C6 1.9(8) . . . . ? 
C4 C5 C6 C7 0.3(8) . . . . ? 
C5 C6 C7 C2 -3.3(7) . . . . ? 
C3 C2 C7 C6 4.1(7) . . . . ? 
P1 C2 C7 C6 -176.9(4) . . . . ? 
N1 P1 C8 C13 71.6(4) . . . . ? 
C1 P1 C8 C13 -46.6(4) . . . . ? 
C2 P1 C8 C13 -166.3(4) . . . . ? 
N1 P1 C8 C9 -106.4(4) . . . . ? 
C1 P1 C8 C9 135.4(4) . . . . ? 
C2 P1 C8 C9 15.7(5) . . . . ? 
C13 C8 C9 C10 1.6(7) . . . . ? 
P1 C8 C9 C10 179.6(4) . . . . ? 
C8 C9 C10 C11 0.4(7) . . . . ? 
C9 C10 C11 C12 -2.4(7) . . . . ? 
C10 C11 C12 C13 2.5(7) . . . . ? 
C11 C12 C13 C8 -0.5(7) . . . . ? 
C9 C8 C13 C12 -1.5(7) . . . . ? 
P1 C8 C13 C12 -179.6(4) . . . . ? 
N2 P2 C14 C15 86.9(4) . . . . ? 
C1 P2 C14 C15 -153.7(4) . . . . ? 
C20 P2 C14 C15 -33.0(5) . . . . ? 
N2 P2 C14 C19 -86.0(4) . . . . ? 
C1 P2 C14 C19 33.4(5) . . . . ? 
C20 P2 C14 C19 154.2(4) . . . . ? 
C19 C14 C15 C16 0.5(8) . . . . ? 
P2 C14 C15 C16 -172.5(4) . . . . ? 
C14 C15 C16 C17 0.4(8) . . . . ? 
C15 C16 C17 C18 -1.3(8) . . . . ? 
C16 C17 C18 C19 1.5(8) . . . . ? 
C17 C18 C19 C14 -0.6(8) . . . . ? 
C15 C14 C19 C18 -0.4(7) . . . . ? 
P2 C14 C19 C18 172.5(4) . . . . ? 
N2 P2 C20 C21 7.8(5) . . . . ? 
C1 P2 C20 C21 -112.7(4) . . . . ? 
C14 P2 C20 C21 126.9(4) . . . . ? 
N2 P2 C20 C25 -171.3(4) . . . . ? 
C1 P2 C20 C25 68.2(4) . . . . ? 
C14 P2 C20 C25 -52.2(4) . . . . ? 
C25 C20 C21 C22 -0.1(7) . . . . ? 
P2 C20 C21 C22 -179.2(4) . . . . ? 
C20 C21 C22 C23 -0.6(8) . . . . ? 
C21 C22 C23 C24 1.1(8) . . . . ? 
C22 C23 C24 C25 -0.9(8) . . . . ? 
C23 C24 C25 C20 0.2(8) . . . . ? 
C21 C20 C25 C24 0.4(7) . . . . ? 
P2 C20 C25 C24 179.4(4) . . . . ? 
C35 O1 C32 C33 -41.7(5) . . . . ? 
Nd1 O1 C32 C33 132.1(4) . . . . ? 
O1 C32 C33 C34 25.1(5) . . . . ? 
C32 C33 C34 C35 -0.4(6) . . . . ? 
C32 O1 C35 C34 41.2(5) . . . . ? 
Nd1 O1 C35 C34 -132.7(4) . . . . ? 
C33 C34 C35 O1 -24.5(5) . . . . ? 
C42 C37 C38 C39 0.7(9) . . . . ? 
C36 C37 C38 C39 -176.6(6) . . . . ? 
C37 C38 C39 C40 -1.3(9) . . . . ? 
C38 C39 C40 C41 0.4(9) . . . . ? 
C39 C40 C41 C42 1.2(9) . . . . ? 
C38 C37 C42 C41 0.8(9) . . . . ? 
C36 C37 C42 C41 178.1(6) . . . . ? 
C40 C41 C42 C37 -1.8(10) . . . . ? 
 
_diffrn_measured_fraction_theta_max    0.976 
_diffrn_reflns_theta_full              27.50 
_diffrn_measured_fraction_theta_full   0.981 
_refine_diff_density_max    1.497 
_refine_diff_density_min   -0.814 
_refine_diff_density_rms    0.136 

#=== END
 
data_1b
 
_nottingham_internal_coll_name         GMSTLI
_nottingham_internal_coll_number       11004
_nottingham_internal_coll_client       GM/STL
_nottingham_internal_coll_type         custom
_nottingham_internal_coll_frame_time   '20 and 80'
_nottingham_internal_coll_frame_width  '1'
_nottingham_internal_coll_frame_method '\w scans'
_nottingham_internal_coll_user         DPM
_nottingham_internal_coll_date         16/01/2012
_nottingham_internal_coll_location     NOTTS
_nottingham_internal_NCS_number        ?
_nottingham_internal_process_user      DPM
_nottingham_internal_process_date      17/01/2012
_nottingham_internal_solution_user     WL/DPM
_nottingham_internal_solution_date     16/01/2012
_nottingham_internal_refinement_user   WL/DPM
_nottingham_internal_refinement_date   24/01/2012
_nottingham_internal_validation_user   wl
_nottingham_internal_validation_date   26/1/2012
_nottingham_internal_archive_date      26/1/2012

_audit_creation_method            
;
CrysAlisPro, Oxford Diffraction Ltd.,
Version 1.171.35.19 (release 27-10-2011 CrysAlis171 .NET)
(compiled Oct 27 2011,15:02:11)
; 
_chemical_name_systematic 
; 
 ? 
; 
_chemical_name_common             ? 
_chemical_melting_point           ? 
_chemical_formula_moiety          'C35 H47 Gd I2 N2 O1 P2 Si2, C4 H8 O' 
_chemical_formula_sum 
 'C39 H55 Gd I2 N2 O2 P2 Si2' 
_chemical_formula_weight          1113.02 
 
loop_ 
 _atom_type_symbol 
 _atom_type_description 
 _atom_type_scat_dispersion_real 
 _atom_type_scat_dispersion_imag 
 _atom_type_scat_source 
 'C'  'C'   0.0181   0.0091 
 'International Tables Vol C Tables 4.2.6.8 and 6.1.1.4' 
 'H'  'H'   0.0000   0.0000 
 'International Tables Vol C Tables 4.2.6.8 and 6.1.1.4' 
 'Gd'  'Gd'  -8.8380  11.9157 
 'International Tables Vol C Tables 4.2.6.8 and 6.1.1.4' 
 'I'  'I'  -0.3257   6.8362 
 'International Tables Vol C Tables 4.2.6.8 and 6.1.1.4' 
 'N'  'N'   0.0311   0.0180 
 'International Tables Vol C Tables 4.2.6.8 and 6.1.1.4' 
 'O'  'O'   0.0492   0.0322 
 'International Tables Vol C Tables 4.2.6.8 and 6.1.1.4' 
 'P'  'P'   0.2955   0.4335 
 'International Tables Vol C Tables 4.2.6.8 and 6.1.1.4' 
 'Si'  'Si'   0.2541   0.3302 
 'International Tables Vol C Tables 4.2.6.8 and 6.1.1.4' 
 
_symmetry_cell_setting            monoclinic
_symmetry_space_group_name_H-M    'P 21/c' 
_symmetry_space_group_name_Hall   '-P 2ybc'
 
loop_ 
 _symmetry_equiv_pos_as_xyz 
 'x, y, z' 
 '-x, y+1/2, -z+1/2' 
 '-x, -y, -z' 
 'x, -y-1/2, z-1/2' 
 
_cell_length_a                    16.1695(8) 
_cell_length_b                    19.5199(12) 
_cell_length_c                    14.1982(8) 
_cell_angle_alpha                 90.00 
_cell_angle_beta                  99.491(5) 
_cell_angle_gamma                 90.00 
_cell_volume                      4420.0(4) 
_cell_formula_units_Z             4 
_cell_measurement_temperature     90(2) 
_cell_measurement_reflns_used     5773
_cell_measurement_theta_min       3.58
_cell_measurement_theta_max       74.72
 
_exptl_crystal_description        block
_exptl_crystal_colour             colourless
_exptl_crystal_size_min           0.0547
_exptl_crystal_size_mid           0.1124
_exptl_crystal_size_max           0.1357
_exptl_crystal_density_meas       ? 
_exptl_crystal_density_diffrn     1.673 
_exptl_crystal_density_method     'not measured' 
_exptl_crystal_F_000              2188 
_exptl_absorpt_coefficient_mu     22.135 
_exptl_absorpt_correction_type    'gaussian'
_exptl_absorpt_correction_T_min   0.327
_exptl_absorpt_correction_T_max   0.650
_exptl_absorpt_process_details    
;
CrysAlisPro, Agilent Technologies,
Version 1.171.35.19 (release 27-10-2011 CrysAlis171 .NET)
(compiled Oct 27 2011,15:02:11)
Numerical absorption correction based on gaussian integration over
			a multifaceted crystal model
; 
 
_exptl_special_details 
; 
 ? 
; 
 
_diffrn_ambient_temperature       90(2)
_diffrn_radiation_wavelength      1.5418
_diffrn_radiation_type            'Cu K\a'
_diffrn_radiation_source          'SuperNova (Cu) X-ray Source'
_diffrn_radiation_monochromator   'mirror'
_diffrn_measurement_device_type   'SuperNova, Single source at offset), Atlas'
_diffrn_measurement_method        '\w scans'
_diffrn_detector_area_resol_mean  10.3613
_diffrn_standards_number          0
_diffrn_standards_interval_count  .
_diffrn_standards_decay_%         0 
_diffrn_reflns_number             28684 
_diffrn_reflns_av_R_equivalents   0.1240 
_diffrn_reflns_av_sigmaI/netI     0.1231 
_diffrn_reflns_limit_h_min        -20 
_diffrn_reflns_limit_h_max        16 
_diffrn_reflns_limit_k_min        -23 
_diffrn_reflns_limit_k_max        23 
_diffrn_reflns_limit_l_min        -17 
_diffrn_reflns_limit_l_max        17 
_diffrn_reflns_theta_min          3.58 
_diffrn_reflns_theta_max          74.98 
_reflns_number_total              8830 
_reflns_number_gt                 6154 
_reflns_threshold_expression      I>2\s(I)

_computing_data_collection       
;
CrysAlisPro, Agilent Technologies,
Version 1.171.35.19 (release 27-10-2011 CrysAlis171 .NET)
(compiled Oct 27 2011,15:02:11)
;
_computing_cell_refinement       
;
CrysAlisPro, Agilent Technologies,
Version 1.171.35.19 (release 27-10-2011 CrysAlis171 .NET)
(compiled Oct 27 2011,15:02:11)
;
_computing_data_reduction        
;
CrysAlisPro, Agilent Technologies,
Version 1.171.35.19 (release 27-10-2011 CrysAlis171 .NET)
(compiled Oct 27 2011,15:02:11)
;
_computing_structure_solution    'SHELXS97 (Sheldrick, 2008)'
_computing_structure_refinement  'SHELXL97 (Sheldrick, 2008)'
_computing_molecular_graphics    ' ? '
_computing_publication_material  'enCIFer(Allen et al.,2004);PLATON(Spek,2003)'
 
_refine_special_details 
; 
Both THF molecules show disorder in the position of one carbon atom; 
occupanicies of the disorder components were refined competitively. 
Chemically equivalent C-C and C-O bond distances related to the 
disordered atoms were restrained to be approximately equal. Global 
rigid bond restraints were applied and additional similarity restraints 
were applied to the atomic displacement parameters of the coordinated 
THF molecule. The minor component atom of the non-coordinated THF could 
not be sensibly modelled anisotropically and so was refined isotropically.
; 
 
_refine_ls_structure_factor_coef  Fsqd  
_refine_ls_matrix_type            full 
_refine_ls_weighting_scheme       calc  
_refine_ls_weighting_details 
 'calc w=1/[\s^2^(Fo^2^)+(0.0465P)^2^] where P=(Fo^2^+2Fc^2^)/3' 
_atom_sites_solution_primary      direct 
_atom_sites_solution_secondary    difmap 
_atom_sites_solution_hydrogens    'geom, Me from difmap' 
_refine_ls_hydrogen_treatment     constr 
_refine_ls_extinction_method      none 
_refine_ls_extinction_coef        ? 
_refine_ls_number_reflns          8830 
_refine_ls_number_parameters      472 
_refine_ls_number_restraints      212 
_refine_ls_R_factor_all           0.0951 
_refine_ls_R_factor_gt            0.0589 
_refine_ls_wR_factor_ref          0.1518 
_refine_ls_wR_factor_gt           0.1300 
_refine_ls_goodness_of_fit_ref    1.033 
_refine_ls_restrained_S_all       1.023 
_refine_ls_shift/su_max           0.001 
_refine_ls_shift/su_mean          0.000 
 
loop_ 
 _atom_site_label 
 _atom_site_type_symbol 
 _atom_site_fract_x 
 _atom_site_fract_y 
 _atom_site_fract_z 
 _atom_site_U_iso_or_equiv 
 _atom_site_adp_type 
 _atom_site_occupancy 
 _atom_site_symmetry_multiplicity 
 _atom_site_calc_flag 
 _atom_site_refinement_flags 
 _atom_site_disorder_assembly 
 _atom_site_disorder_group 
Gd1 Gd 0.30180(3) 0.60332(3) 0.80743(4) 0.01317(13) Uani 1 1 d U . . 
I1 I 0.49070(3) 0.60894(3) 0.81310(4) 0.02209(15) Uani 1 1 d U . . 
I2 I 0.26662(3) 0.75327(3) 0.76494(4) 0.01996(14) Uani 1 1 d U . . 
P1 P 0.18217(13) 0.49313(11) 0.86632(15) 0.0129(4) Uani 1 1 d U . . 
P2 P 0.27128(13) 0.46837(11) 0.69327(15) 0.0123(4) Uani 1 1 d U . . 
Si1 Si 0.08039(14) 0.62473(12) 0.85930(17) 0.0152(5) Uani 1 1 d U . . 
Si2 Si 0.27866(15) 0.58542(13) 0.54785(17) 0.0169(5) Uani 1 1 d U . . 
O1 O 0.3454(4) 0.5988(3) 0.9752(4) 0.0186(12) Uani 1 1 d U A . 
N1 N 0.1669(4) 0.5734(4) 0.8469(5) 0.0136(13) Uani 1 1 d U . . 
N2 N 0.2759(4) 0.5462(4) 0.6571(5) 0.0134(13) Uani 1 1 d U . . 
C1 C 0.2707(5) 0.4701(5) 0.8170(6) 0.0135(14) Uani 1 1 d U . . 
H1 H 0.3141 0.4418 0.8579 0.016 Uiso 1 1 calc R . . 
C2 C 0.0879(5) 0.4438(5) 0.8226(6) 0.0173(16) Uani 1 1 d U . . 
C3 C 0.0360(6) 0.4673(5) 0.7414(6) 0.0192(17) Uani 1 1 d U . . 
H3 H 0.0503 0.5077 0.7106 0.023 Uiso 1 1 calc R . . 
C4 C -0.0373(6) 0.4318(5) 0.7047(8) 0.027(2) Uani 1 1 d U . . 
H4 H -0.0726 0.4484 0.6493 0.033 Uiso 1 1 calc R . . 
C5 C -0.0587(6) 0.3727(6) 0.7485(7) 0.025(2) Uani 1 1 d U . . 
H5 H -0.1086 0.3486 0.7233 0.030 Uiso 1 1 calc R . . 
C6 C -0.0065(6) 0.3483(5) 0.8304(7) 0.026(2) Uani 1 1 d U . . 
H6 H -0.0206 0.3077 0.8610 0.031 Uiso 1 1 calc R . . 
C7 C 0.0666(6) 0.3846(5) 0.8668(6) 0.0176(17) Uani 1 1 d U . . 
H7 H 0.1021 0.3684 0.9223 0.021 Uiso 1 1 calc R . . 
C8 C 0.2089(5) 0.4717(5) 0.9921(6) 0.0166(16) Uani 1 1 d U . . 
C9 C 0.1955(6) 0.5203(5) 1.0589(6) 0.0187(18) Uani 1 1 d U . . 
H9 H 0.1706 0.5631 1.0389 0.022 Uiso 1 1 calc R . . 
C10 C 0.2193(6) 0.5058(6) 1.1572(7) 0.025(2) Uani 1 1 d U . . 
H10 H 0.2095 0.5387 1.2034 0.030 Uiso 1 1 calc R . . 
C11 C 0.2561(7) 0.4452(6) 1.1859(7) 0.030(2) Uani 1 1 d U . . 
H11 H 0.2728 0.4365 1.2521 0.036 Uiso 1 1 calc R . . 
C12 C 0.2699(6) 0.3949(5) 1.1190(7) 0.0231(19) Uani 1 1 d U . . 
H12 H 0.2950 0.3522 1.1392 0.028 Uiso 1 1 calc R . . 
C13 C 0.2456(6) 0.4097(5) 1.0217(7) 0.0224(19) Uani 1 1 d U . . 
H13 H 0.2545 0.3765 0.9754 0.027 Uiso 1 1 calc R . . 
C14 C 0.3634(6) 0.4185(5) 0.6760(6) 0.0167(17) Uani 1 1 d U . . 
C15 C 0.4300(5) 0.4535(5) 0.6459(7) 0.021(2) Uani 1 1 d U . . 
H15 H 0.4262 0.5015 0.6354 0.025 Uiso 1 1 calc R . . 
C16 C 0.5010(6) 0.4188(6) 0.6315(8) 0.027(2) Uani 1 1 d U . . 
H16 H 0.5462 0.4427 0.6114 0.032 Uiso 1 1 calc R . . 
C17 C 0.5062(6) 0.3474(6) 0.6466(7) 0.028(2) Uani 1 1 d U . . 
H17 H 0.5548 0.3233 0.6360 0.033 Uiso 1 1 calc R . . 
C18 C 0.4416(6) 0.3127(5) 0.6766(7) 0.027(2) Uani 1 1 d U . . 
H18 H 0.4455 0.2646 0.6868 0.033 Uiso 1 1 calc R . . 
C19 C 0.3698(6) 0.3482(5) 0.6924(7) 0.0209(19) Uani 1 1 d U . . 
H19 H 0.3254 0.3243 0.7143 0.025 Uiso 1 1 calc R . . 
C20 C 0.1823(5) 0.4212(4) 0.6283(6) 0.0116(15) Uani 1 1 d U . . 
C21 C 0.1317(5) 0.4501(5) 0.5509(6) 0.0148(16) Uani 1 1 d U . . 
H21 H 0.1415 0.4958 0.5326 0.018 Uiso 1 1 calc R . . 
C22 C 0.0665(6) 0.4127(5) 0.4997(6) 0.0190(18) Uani 1 1 d U . . 
H22 H 0.0321 0.4329 0.4462 0.023 Uiso 1 1 calc R . . 
C23 C 0.0512(6) 0.3470(5) 0.5257(7) 0.0193(18) Uani 1 1 d U . . 
H23 H 0.0080 0.3210 0.4886 0.023 Uiso 1 1 calc R . . 
C24 C 0.0989(5) 0.3187(5) 0.6061(7) 0.0188(18) Uani 1 1 d U . . 
H24 H 0.0874 0.2736 0.6255 0.023 Uiso 1 1 calc R . . 
C25 C 0.1631(6) 0.3560(4) 0.6579(7) 0.0191(18) Uani 1 1 d U . . 
H25 H 0.1946 0.3370 0.7142 0.023 Uiso 1 1 calc R . . 
C26 C 0.0365(6) 0.6638(5) 0.7417(7) 0.0210(18) Uani 1 1 d U . . 
H26A H 0.0816 0.6865 0.7151 0.032 Uiso 1 1 calc R . . 
H26B H -0.0065 0.6974 0.7505 0.032 Uiso 1 1 calc R . . 
H26C H 0.0116 0.6278 0.6978 0.032 Uiso 1 1 calc R . . 
C27 C 0.1149(6) 0.6954(5) 0.9445(7) 0.0217(18) Uani 1 1 d U . . 
H27A H 0.1303 0.6766 1.0090 0.033 Uiso 1 1 calc R . . 
H27B H 0.0690 0.7283 0.9437 0.033 Uiso 1 1 calc R . . 
H27C H 0.1635 0.7185 0.9258 0.033 Uiso 1 1 calc R . . 
C28 C -0.0067(6) 0.5791(5) 0.9058(8) 0.025(2) Uani 1 1 d U . . 
H28A H -0.0304 0.5439 0.8600 0.037 Uiso 1 1 calc R . . 
H28B H -0.0504 0.6121 0.9146 0.037 Uiso 1 1 calc R . . 
H28C H 0.0154 0.5575 0.9671 0.037 Uiso 1 1 calc R . . 
C29 C 0.1811(6) 0.6382(5) 0.5148(8) 0.027(2) Uani 1 1 d U . . 
H29A H 0.1317 0.6088 0.5131 0.041 Uiso 1 1 calc R . . 
H29B H 0.1806 0.6588 0.4517 0.041 Uiso 1 1 calc R . . 
H29C H 0.1800 0.6745 0.5623 0.041 Uiso 1 1 calc R . . 
C30 C 0.3692(6) 0.6458(5) 0.5579(8) 0.026(2) Uani 1 1 d U . . 
H30A H 0.3677 0.6771 0.6117 0.040 Uiso 1 1 calc R . . 
H30B H 0.3657 0.6723 0.4988 0.040 Uiso 1 1 calc R . . 
H30C H 0.4218 0.6198 0.5687 0.040 Uiso 1 1 calc R . . 
C31 C 0.2880(6) 0.5248(5) 0.4473(7) 0.024(2) Uani 1 1 d U . . 
H31A H 0.3414 0.5002 0.4614 0.035 Uiso 1 1 calc R . . 
H31B H 0.2859 0.5508 0.3879 0.035 Uiso 1 1 calc R . . 
H31C H 0.2416 0.4920 0.4403 0.035 Uiso 1 1 calc R . . 
C32 C 0.4070(5) 0.5516(5) 1.0301(7) 0.0194(16) Uani 1 1 d DU A . 
H32A H 0.4334 0.5223 0.9865 0.023 Uiso 1 1 calc R . . 
H32B H 0.3795 0.5219 1.0723 0.023 Uiso 1 1 calc R . . 
C33 C 0.4717(6) 0.5972(5) 1.0884(8) 0.0294(19) Uani 1 1 d DU . . 
H33A H 0.5256 0.5951 1.0641 0.035 Uiso 0.69(3) 1 calc PR A 1 
H33B H 0.4813 0.5831 1.1563 0.035 Uiso 0.69(3) 1 calc PR A 1 
H33C H 0.5127 0.6149 1.0498 0.035 Uiso 0.31(3) 1 calc PR A 2 
H33D H 0.5017 0.5731 1.1453 0.035 Uiso 0.31(3) 1 calc PR A 2 
C34 C 0.4331(8) 0.6728(7) 1.0768(14) 0.029(3) Uani 0.69(3) 1 d PDU A 1 
H34A H 0.4362 0.6956 1.1396 0.035 Uiso 0.69(3) 1 calc PR A 1 
H34B H 0.4626 0.7013 1.0352 0.035 Uiso 0.69(3) 1 calc PR A 1 
C34A C 0.4134(19) 0.6568(19) 1.117(2) 0.030(3) Uani 0.31(3) 1 d PDU A 2 
H34C H 0.3907 0.6449 1.1760 0.036 Uiso 0.31(3) 1 calc PR A 2 
H34D H 0.4442 0.7007 1.1274 0.036 Uiso 0.31(3) 1 calc PR A 2 
C35 C 0.3451(6) 0.6601(6) 1.0322(7) 0.0290(19) Uani 1 1 d DU . . 
H35A H 0.3095 0.6536 1.0819 0.035 Uiso 0.69(3) 1 calc PR A 1 
H35B H 0.3231 0.6994 0.9916 0.035 Uiso 0.69(3) 1 calc PR A 1 
H35C H 0.2902 0.6649 1.0536 0.035 Uiso 0.31(3) 1 calc PR A 2 
H35D H 0.3537 0.7007 0.9931 0.035 Uiso 0.31(3) 1 calc PR A 2 
O2 O 0.2734(5) 0.2813(4) 0.8654(6) 0.0354(17) Uani 1 1 d DU . . 
C36 C 0.3529(6) 0.2547(6) 0.9122(8) 0.035(2) Uani 1 1 d DU B . 
H36A H 0.3654 0.2710 0.9790 0.042 Uiso 1 1 calc R . . 
H36B H 0.3987 0.2696 0.8783 0.042 Uiso 1 1 calc R . . 
C37 C 0.3448(7) 0.1785(6) 0.9094(9) 0.037(3) Uani 1 1 d DU . . 
H37A H 0.3816 0.1569 0.9640 0.044 Uiso 1 1 calc R B . 
H37B H 0.3582 0.1596 0.8490 0.044 Uiso 1 1 calc R . . 
C38 C 0.2532(8) 0.1686(6) 0.9162(10) 0.042(3) Uani 1 1 d DU B . 
H38A H 0.2323 0.1237 0.8898 0.050 Uiso 0.62(6) 1 calc PR B 1 
H38B H 0.2434 0.1723 0.9830 0.050 Uiso 0.62(6) 1 calc PR B 1 
H38C H 0.2272 0.1350 0.8680 0.050 Uiso 0.38(6) 1 calc PR B 2 
H38D H 0.2471 0.1517 0.9805 0.050 Uiso 0.38(6) 1 calc PR B 2 
C39 C 0.2137(9) 0.2260(8) 0.8570(17) 0.029(5) Uani 0.62(6) 1 d PDU B 1 
H39A H 0.1989 0.2115 0.7895 0.035 Uiso 0.62(6) 1 calc PR B 1 
H39B H 0.1619 0.2408 0.8798 0.035 Uiso 0.62(6) 1 calc PR B 1 
C39A C 0.2127(15) 0.2371(11) 0.898(3) 0.030(9) Uiso 0.38(6) 1 d PDU B 2 
H39C H 0.1617 0.2335 0.8490 0.037 Uiso 0.38(6) 1 calc PR B 2 
H39D H 0.1964 0.2555 0.9574 0.037 Uiso 0.38(6) 1 calc PR B 2 
 
loop_ 
 _atom_site_aniso_label 
 _atom_site_aniso_U_11 
 _atom_site_aniso_U_22 
 _atom_site_aniso_U_33 
 _atom_site_aniso_U_23 
 _atom_site_aniso_U_13 
 _atom_site_aniso_U_12 
Gd1 0.0077(2) 0.0151(2) 0.0169(2) -0.0007(2) 0.0028(2) -0.00085(18) 
I1 0.0079(3) 0.0289(3) 0.0295(3) 0.0008(2) 0.0034(2) -0.0020(2) 
I2 0.0164(3) 0.0165(3) 0.0283(3) 0.0013(2) 0.0076(2) 0.0012(2) 
P1 0.0090(10) 0.0152(10) 0.0154(9) 0.0006(8) 0.0045(8) 0.0004(8) 
P2 0.0072(9) 0.0137(9) 0.0167(10) -0.0010(8) 0.0039(8) -0.0004(7) 
Si1 0.0089(11) 0.0188(11) 0.0186(11) -0.0029(9) 0.0044(9) 0.0029(9) 
Si2 0.0166(12) 0.0200(12) 0.0150(11) 0.0019(9) 0.0049(10) -0.0014(9) 
O1 0.011(3) 0.029(3) 0.013(3) -0.003(2) -0.007(2) 0.002(2) 
N1 0.007(3) 0.021(3) 0.013(3) 0.004(3) 0.002(3) 0.000(2) 
N2 0.008(3) 0.016(3) 0.016(3) -0.003(2) 0.004(3) -0.002(2) 
C1 0.006(4) 0.019(3) 0.014(3) 0.001(3) -0.001(3) 0.001(3) 
C2 0.012(4) 0.026(4) 0.017(4) -0.009(3) 0.010(3) -0.001(3) 
C3 0.014(4) 0.025(5) 0.019(4) -0.001(4) 0.006(3) -0.001(3) 
C4 0.018(4) 0.029(5) 0.035(5) -0.006(4) 0.004(4) 0.003(4) 
C5 0.015(4) 0.035(5) 0.026(5) -0.011(4) 0.009(4) -0.007(4) 
C6 0.029(5) 0.028(5) 0.024(5) -0.008(4) 0.015(4) -0.012(4) 
C7 0.018(4) 0.025(4) 0.012(4) -0.002(3) 0.009(3) 0.002(3) 
C8 0.013(4) 0.022(4) 0.015(3) 0.002(3) 0.002(3) -0.003(3) 
C9 0.011(4) 0.032(5) 0.013(4) -0.001(3) 0.001(3) 0.000(4) 
C10 0.017(5) 0.040(5) 0.015(4) -0.006(4) -0.003(4) 0.000(4) 
C11 0.022(5) 0.055(6) 0.014(4) 0.014(4) 0.005(4) 0.009(5) 
C12 0.015(5) 0.031(5) 0.022(4) 0.011(4) -0.003(4) 0.002(4) 
C13 0.012(4) 0.034(5) 0.022(4) 0.005(4) 0.004(4) -0.003(4) 
C14 0.015(4) 0.018(4) 0.020(4) -0.009(3) 0.011(4) -0.002(3) 
C15 0.007(4) 0.022(4) 0.036(5) -0.005(4) 0.007(4) 0.000(3) 
C16 0.012(4) 0.041(5) 0.028(5) 0.002(5) 0.005(4) 0.008(4) 
C17 0.022(5) 0.041(5) 0.021(5) -0.001(4) 0.005(4) 0.020(4) 
C18 0.028(5) 0.021(5) 0.028(5) 0.000(4) -0.006(4) 0.012(4) 
C19 0.018(5) 0.016(4) 0.030(5) -0.002(4) 0.007(4) 0.007(3) 
C20 0.004(3) 0.013(3) 0.018(4) -0.005(3) 0.003(3) 0.003(3) 
C21 0.007(4) 0.026(4) 0.011(4) 0.001(3) 0.001(3) 0.000(3) 
C22 0.012(4) 0.031(5) 0.013(4) 0.001(3) 0.000(3) -0.011(4) 
C23 0.014(4) 0.024(4) 0.019(4) -0.005(4) 0.000(3) 0.000(3) 
C24 0.012(4) 0.017(4) 0.027(4) -0.005(3) 0.002(4) -0.006(3) 
C25 0.016(4) 0.011(4) 0.030(5) -0.002(3) 0.004(4) -0.001(3) 
C26 0.016(4) 0.016(4) 0.028(4) -0.007(3) -0.005(4) 0.001(3) 
C27 0.015(4) 0.023(4) 0.027(5) 0.000(4) 0.002(4) 0.003(3) 
C28 0.018(5) 0.024(5) 0.034(5) -0.009(4) 0.012(4) -0.003(4) 
C29 0.024(5) 0.027(5) 0.027(5) -0.003(4) -0.008(4) -0.001(4) 
C30 0.018(4) 0.026(5) 0.037(6) 0.005(4) 0.008(4) -0.008(4) 
C31 0.020(5) 0.035(5) 0.017(4) -0.004(4) 0.007(4) -0.006(4) 
C32 0.012(4) 0.022(4) 0.022(4) 0.005(3) -0.002(3) 0.008(3) 
C33 0.024(4) 0.034(4) 0.027(4) -0.002(4) -0.007(3) 0.010(3) 
C34 0.024(5) 0.030(5) 0.028(6) -0.010(5) -0.010(5) 0.006(4) 
C34A 0.026(6) 0.034(6) 0.024(6) -0.010(5) -0.012(5) 0.009(6) 
C35 0.028(4) 0.031(4) 0.023(4) -0.015(4) -0.009(4) 0.009(3) 
O2 0.035(4) 0.029(4) 0.042(5) 0.007(3) 0.004(4) -0.003(3) 
C36 0.029(5) 0.040(6) 0.033(6) 0.002(5) -0.001(5) 0.000(4) 
C37 0.036(6) 0.037(5) 0.039(6) 0.004(5) 0.010(5) 0.008(5) 
C38 0.048(6) 0.026(5) 0.060(8) 0.007(5) 0.033(7) 0.004(5) 
C39 0.022(6) 0.026(8) 0.045(13) 0.000(7) 0.024(7) -0.006(5) 
 
_geom_special_details 
; 
 All esds (except the esd in the dihedral angle between two l.s. planes) 
 are estimated using the full covariance matrix.  The cell esds are taken 
 into account individually in the estimation of esds in distances, angles 
 and torsion angles; correlations between esds in cell parameters are only 
 used when they are defined by crystal symmetry.  An approximate (isotropic) 
 treatment of cell esds is used for estimating esds involving l.s. planes. 
; 
 
loop_ 
 _geom_bond_atom_site_label_1 
 _geom_bond_atom_site_label_2 
 _geom_bond_distance 
 _geom_bond_site_symmetry_2 
 _geom_bond_publ_flag 
Gd1 O1 2.372(6) . ? 
Gd1 N2 2.383(7) . ? 
Gd1 N1 2.412(7) . ? 
Gd1 C1 2.657(9) . ? 
Gd1 I2 3.0234(8) . ? 
Gd1 I1 3.0442(7) . ? 
P1 N1 1.603(8) . ? 
P1 C1 1.752(8) . ? 
P1 C8 1.816(9) . ? 
P1 C2 1.823(9) . ? 
P2 N2 1.608(8) . ? 
P2 C1 1.759(9) . ? 
P2 C20 1.824(9) . ? 
P2 C14 1.830(9) . ? 
Si1 N1 1.753(7) . ? 
Si1 C27 1.859(10) . ? 
Si1 C26 1.865(10) . ? 
Si1 C28 1.875(9) . ? 
Si2 N2 1.738(8) . ? 
Si2 C30 1.867(10) . ? 
Si2 C29 1.878(11) . ? 
Si2 C31 1.879(10) . ? 
O1 C35 1.446(12) . ? 
O1 C32 1.481(11) . ? 
C1 H1 1.0000 . ? 
C2 C7 1.384(13) . ? 
C2 C3 1.387(14) . ? 
C3 C4 1.398(14) . ? 
C3 H3 0.9500 . ? 
C4 C5 1.381(16) . ? 
C4 H4 0.9500 . ? 
C5 C6 1.403(15) . ? 
C5 H5 0.9500 . ? 
C6 C7 1.402(14) . ? 
C6 H6 0.9500 . ? 
C7 H7 0.9500 . ? 
C8 C13 1.382(14) . ? 
C8 C9 1.384(13) . ? 
C9 C10 1.414(13) . ? 
C9 H9 0.9500 . ? 
C10 C11 1.357(16) . ? 
C10 H10 0.9500 . ? 
C11 C12 1.409(16) . ? 
C11 H11 0.9500 . ? 
C12 C13 1.402(13) . ? 
C12 H12 0.9500 . ? 
C13 H13 0.9500 . ? 
C14 C19 1.392(13) . ? 
C14 C15 1.400(12) . ? 
C15 C16 1.377(13) . ? 
C15 H15 0.9500 . ? 
C16 C17 1.409(16) . ? 
C16 H16 0.9500 . ? 
C17 C18 1.370(16) . ? 
C17 H17 0.9500 . ? 
C18 C19 1.402(13) . ? 
C18 H18 0.9500 . ? 
C19 H19 0.9500 . ? 
C20 C21 1.377(12) . ? 
C20 C25 1.393(12) . ? 
C21 C22 1.385(13) . ? 
C21 H21 0.9500 . ? 
C22 C23 1.367(14) . ? 
C22 H22 0.9500 . ? 
C23 C24 1.384(14) . ? 
C23 H23 0.9500 . ? 
C24 C25 1.377(13) . ? 
C24 H24 0.9500 . ? 
C25 H25 0.9500 . ? 
C26 H26A 0.9800 . ? 
C26 H26B 0.9800 . ? 
C26 H26C 0.9800 . ? 
C27 H27A 0.9800 . ? 
C27 H27B 0.9800 . ? 
C27 H27C 0.9800 . ? 
C28 H28A 0.9800 . ? 
C28 H28B 0.9800 . ? 
C28 H28C 0.9800 . ? 
C29 H29A 0.9800 . ? 
C29 H29B 0.9800 . ? 
C29 H29C 0.9800 . ? 
C30 H30A 0.9800 . ? 
C30 H30B 0.9800 . ? 
C30 H30C 0.9800 . ? 
C31 H31A 0.9800 . ? 
C31 H31B 0.9800 . ? 
C31 H31C 0.9800 . ? 
C32 C33 1.512(13) . ? 
C32 H32A 0.9900 . ? 
C32 H32B 0.9900 . ? 
C33 C34A 1.59(2) . ? 
C33 C34 1.599(17) . ? 
C33 H33A 0.9900 . ? 
C33 H33B 0.9900 . ? 
C33 H33C 0.9900 . ? 
C33 H33D 0.9900 . ? 
C34 C35 1.480(15) . ? 
C34 H34A 0.9900 . ? 
C34 H34B 0.9900 . ? 
C34A C35 1.498(18) . ? 
C34A H34C 0.9900 . ? 
C34A H34D 0.9900 . ? 
C35 H35A 0.9900 . ? 
C35 H35B 0.9900 . ? 
C35 H35C 0.9900 . ? 
C35 H35D 0.9900 . ? 
O2 C39A 1.441(17) . ? 
O2 C39 1.441(13) . ? 
O2 C36 1.443(12) . ? 
C36 C37 1.492(14) . ? 
C36 H36A 0.9900 . ? 
C36 H36B 0.9900 . ? 
C37 C38 1.512(17) . ? 
C37 H37A 0.9900 . ? 
C37 H37B 0.9900 . ? 
C38 C39 1.481(16) . ? 
C38 C39A 1.494(19) . ? 
C38 H38A 0.9900 . ? 
C38 H38B 0.9900 . ? 
C38 H38C 0.9900 . ? 
C38 H38D 0.9900 . ? 
C39 H39A 0.9900 . ? 
C39 H39B 0.9900 . ? 
C39A H39C 0.9900 . ? 
C39A H39D 0.9900 . ? 
 
loop_ 
 _geom_angle_atom_site_label_1 
 _geom_angle_atom_site_label_2 
 _geom_angle_atom_site_label_3 
 _geom_angle 
 _geom_angle_site_symmetry_1 
 _geom_angle_site_symmetry_3 
 _geom_angle_publ_flag 
O1 Gd1 N2 149.4(2) . . ? 
O1 Gd1 N1 83.6(2) . . ? 
N2 Gd1 N1 93.6(2) . . ? 
O1 Gd1 C1 86.5(2) . . ? 
N2 Gd1 C1 65.2(3) . . ? 
N1 Gd1 C1 64.2(3) . . ? 
O1 Gd1 I2 104.56(16) . . ? 
N2 Gd1 I2 105.97(18) . . ? 
N1 Gd1 I2 97.67(18) . . ? 
C1 Gd1 I2 157.97(18) . . ? 
O1 Gd1 I1 81.04(15) . . ? 
N2 Gd1 I1 93.89(16) . . ? 
N1 Gd1 I1 160.84(18) . . ? 
C1 Gd1 I1 103.39(17) . . ? 
I2 Gd1 I1 97.20(2) . . ? 
N1 P1 C1 107.2(4) . . ? 
N1 P1 C8 113.6(4) . . ? 
C1 P1 C8 104.8(4) . . ? 
N1 P1 C2 111.1(4) . . ? 
C1 P1 C2 114.9(4) . . ? 
C8 P1 C2 105.2(4) . . ? 
N2 P2 C1 108.0(4) . . ? 
N2 P2 C20 112.9(4) . . ? 
C1 P2 C20 112.4(4) . . ? 
N2 P2 C14 112.2(4) . . ? 
C1 P2 C14 106.4(4) . . ? 
C20 P2 C14 104.8(4) . . ? 
N1 Si1 C27 109.4(4) . . ? 
N1 Si1 C26 109.6(4) . . ? 
C27 Si1 C26 108.0(4) . . ? 
N1 Si1 C28 114.9(4) . . ? 
C27 Si1 C28 106.5(4) . . ? 
C26 Si1 C28 108.2(5) . . ? 
N2 Si2 C30 110.2(4) . . ? 
N2 Si2 C29 108.7(4) . . ? 
C30 Si2 C29 106.8(5) . . ? 
N2 Si2 C31 114.7(4) . . ? 
C30 Si2 C31 107.2(4) . . ? 
C29 Si2 C31 109.0(5) . . ? 
C35 O1 C32 106.5(7) . . ? 
C35 O1 Gd1 120.3(6) . . ? 
C32 O1 Gd1 127.9(5) . . ? 
P1 N1 Si1 130.1(4) . . ? 
P1 N1 Gd1 99.0(3) . . ? 
Si1 N1 Gd1 130.7(4) . . ? 
P2 N2 Si2 135.3(5) . . ? 
P2 N2 Gd1 99.6(3) . . ? 
Si2 N2 Gd1 124.5(4) . . ? 
P1 C1 P2 122.9(5) . . ? 
P1 C1 Gd1 86.7(3) . . ? 
P2 C1 Gd1 86.3(3) . . ? 
P1 C1 H1 116.8 . . ? 
P2 C1 H1 116.8 . . ? 
Gd1 C1 H1 116.8 . . ? 
C7 C2 C3 119.4(9) . . ? 
C7 C2 P1 122.9(8) . . ? 
C3 C2 P1 117.8(7) . . ? 
C2 C3 C4 120.4(9) . . ? 
C2 C3 H3 119.8 . . ? 
C4 C3 H3 119.8 . . ? 
C5 C4 C3 120.4(10) . . ? 
C5 C4 H4 119.8 . . ? 
C3 C4 H4 119.8 . . ? 
C4 C5 C6 119.6(9) . . ? 
C4 C5 H5 120.2 . . ? 
C6 C5 H5 120.2 . . ? 
C7 C6 C5 119.3(9) . . ? 
C7 C6 H6 120.3 . . ? 
C5 C6 H6 120.3 . . ? 
C2 C7 C6 120.8(9) . . ? 
C2 C7 H7 119.6 . . ? 
C6 C7 H7 119.6 . . ? 
C13 C8 C9 120.0(9) . . ? 
C13 C8 P1 121.4(7) . . ? 
C9 C8 P1 118.5(7) . . ? 
C8 C9 C10 119.4(9) . . ? 
C8 C9 H9 120.3 . . ? 
C10 C9 H9 120.3 . . ? 
C11 C10 C9 120.4(10) . . ? 
C11 C10 H10 119.8 . . ? 
C9 C10 H10 119.8 . . ? 
C10 C11 C12 121.0(9) . . ? 
C10 C11 H11 119.5 . . ? 
C12 C11 H11 119.5 . . ? 
C13 C12 C11 118.1(9) . . ? 
C13 C12 H12 120.9 . . ? 
C11 C12 H12 120.9 . . ? 
C8 C13 C12 121.0(10) . . ? 
C8 C13 H13 119.5 . . ? 
C12 C13 H13 119.5 . . ? 
C19 C14 C15 119.5(8) . . ? 
C19 C14 P2 122.8(7) . . ? 
C15 C14 P2 117.7(7) . . ? 
C16 C15 C14 120.5(9) . . ? 
C16 C15 H15 119.8 . . ? 
C14 C15 H15 119.8 . . ? 
C15 C16 C17 119.6(9) . . ? 
C15 C16 H16 120.2 . . ? 
C17 C16 H16 120.2 . . ? 
C18 C17 C16 120.5(9) . . ? 
C18 C17 H17 119.7 . . ? 
C16 C17 H17 119.7 . . ? 
C17 C18 C19 119.9(9) . . ? 
C17 C18 H18 120.1 . . ? 
C19 C18 H18 120.1 . . ? 
C14 C19 C18 120.1(9) . . ? 
C14 C19 H19 120.0 . . ? 
C18 C19 H19 120.0 . . ? 
C21 C20 C25 118.8(8) . . ? 
C21 C20 P2 120.8(7) . . ? 
C25 C20 P2 120.4(7) . . ? 
C20 C21 C22 120.3(9) . . ? 
C20 C21 H21 119.8 . . ? 
C22 C21 H21 119.8 . . ? 
C23 C22 C21 120.5(9) . . ? 
C23 C22 H22 119.8 . . ? 
C21 C22 H22 119.8 . . ? 
C22 C23 C24 119.8(9) . . ? 
C22 C23 H23 120.1 . . ? 
C24 C23 H23 120.1 . . ? 
C25 C24 C23 119.9(9) . . ? 
C25 C24 H24 120.1 . . ? 
C23 C24 H24 120.1 . . ? 
C24 C25 C20 120.6(9) . . ? 
C24 C25 H25 119.7 . . ? 
C20 C25 H25 119.7 . . ? 
Si1 C26 H26A 109.5 . . ? 
Si1 C26 H26B 109.5 . . ? 
H26A C26 H26B 109.5 . . ? 
Si1 C26 H26C 109.5 . . ? 
H26A C26 H26C 109.5 . . ? 
H26B C26 H26C 109.5 . . ? 
Si1 C27 H27A 109.5 . . ? 
Si1 C27 H27B 109.5 . . ? 
H27A C27 H27B 109.5 . . ? 
Si1 C27 H27C 109.5 . . ? 
H27A C27 H27C 109.5 . . ? 
H27B C27 H27C 109.5 . . ? 
Si1 C28 H28A 109.5 . . ? 
Si1 C28 H28B 109.5 . . ? 
H28A C28 H28B 109.5 . . ? 
Si1 C28 H28C 109.5 . . ? 
H28A C28 H28C 109.5 . . ? 
H28B C28 H28C 109.5 . . ? 
Si2 C29 H29A 109.5 . . ? 
Si2 C29 H29B 109.5 . . ? 
H29A C29 H29B 109.5 . . ? 
Si2 C29 H29C 109.5 . . ? 
H29A C29 H29C 109.5 . . ? 
H29B C29 H29C 109.5 . . ? 
Si2 C30 H30A 109.5 . . ? 
Si2 C30 H30B 109.5 . . ? 
H30A C30 H30B 109.5 . . ? 
Si2 C30 H30C 109.5 . . ? 
H30A C30 H30C 109.5 . . ? 
H30B C30 H30C 109.5 . . ? 
Si2 C31 H31A 109.5 . . ? 
Si2 C31 H31B 109.5 . . ? 
H31A C31 H31B 109.5 . . ? 
Si2 C31 H31C 109.5 . . ? 
H31A C31 H31C 109.5 . . ? 
H31B C31 H31C 109.5 . . ? 
O1 C32 C33 105.5(7) . . ? 
O1 C32 H32A 110.6 . . ? 
C33 C32 H32A 110.6 . . ? 
O1 C32 H32B 110.6 . . ? 
C33 C32 H32B 110.6 . . ? 
H32A C32 H32B 108.8 . . ? 
C32 C33 C34A 100.7(13) . . ? 
C32 C33 C34 105.3(8) . . ? 
C32 C33 H33A 110.7 . . ? 
C34A C33 H33A 135.5 . . ? 
C34 C33 H33A 110.7 . . ? 
C32 C33 H33B 110.7 . . ? 
C34A C33 H33B 87.5 . . ? 
C34 C33 H33B 110.7 . . ? 
H33A C33 H33B 108.8 . . ? 
C32 C33 H33C 111.6 . . ? 
C34A C33 H33C 111.6 . . ? 
C34 C33 H33C 84.7 . . ? 
H33B C33 H33C 128.6 . . ? 
C32 C33 H33D 111.6 . . ? 
C34A C33 H33D 111.6 . . ? 
C34 C33 H33D 130.8 . . ? 
H33A C33 H33D 85.6 . . ? 
H33C C33 H33D 109.4 . . ? 
C35 C34 C33 102.7(10) . . ? 
C35 C34 H34A 111.2 . . ? 
C33 C34 H34A 111.2 . . ? 
C35 C34 H34B 111.2 . . ? 
C33 C34 H34B 111.2 . . ? 
H34A C34 H34B 109.1 . . ? 
C35 C34A C33 102.2(12) . . ? 
C35 C34A H34C 111.3 . . ? 
C33 C34A H34C 111.3 . . ? 
C35 C34A H34D 111.3 . . ? 
C33 C34A H34D 111.3 . . ? 
H34C C34A H34D 109.2 . . ? 
O1 C35 C34 106.7(9) . . ? 
O1 C35 C34A 110.3(12) . . ? 
O1 C35 H35A 110.4 . . ? 
C34 C35 H35A 110.4 . . ? 
C34A C35 H35A 81.8 . . ? 
O1 C35 H35B 110.4 . . ? 
C34 C35 H35B 110.4 . . ? 
C34A C35 H35B 130.6 . . ? 
H35A C35 H35B 108.6 . . ? 
O1 C35 H35C 109.6 . . ? 
C34 C35 H35C 134.5 . . ? 
C34A C35 H35C 109.6 . . ? 
H35B C35 H35C 81.4 . . ? 
O1 C35 H35D 109.6 . . ? 
C34 C35 H35D 83.9 . . ? 
C34A C35 H35D 109.6 . . ? 
H35A C35 H35D 130.8 . . ? 
H35C C35 H35D 108.1 . . ? 
C39A O2 C36 103.8(13) . . ? 
C39 O2 C36 107.6(9) . . ? 
O2 C36 C37 106.2(9) . . ? 
O2 C36 H36A 110.5 . . ? 
C37 C36 H36A 110.5 . . ? 
O2 C36 H36B 110.5 . . ? 
C37 C36 H36B 110.5 . . ? 
H36A C36 H36B 108.7 . . ? 
C36 C37 C38 102.0(9) . . ? 
C36 C37 H37A 111.4 . . ? 
C38 C37 H37A 111.4 . . ? 
C36 C37 H37B 111.4 . . ? 
C38 C37 H37B 111.4 . . ? 
H37A C37 H37B 109.2 . . ? 
C39 C38 C37 101.7(10) . . ? 
C39A C38 C37 106.3(11) . . ? 
C39 C38 H38A 111.4 . . ? 
C39A C38 H38A 127.9 . . ? 
C37 C38 H38A 111.4 . . ? 
C39 C38 H38B 111.4 . . ? 
C39A C38 H38B 87.9 . . ? 
C37 C38 H38B 111.4 . . ? 
H38A C38 H38B 109.3 . . ? 
C39 C38 H38C 90.8 . . ? 
C39A C38 H38C 110.5 . . ? 
C37 C38 H38C 110.5 . . ? 
H38B C38 H38C 126.4 . . ? 
C39 C38 H38D 132.5 . . ? 
C39A C38 H38D 110.5 . . ? 
C37 C38 H38D 110.5 . . ? 
H38A C38 H38D 88.6 . . ? 
H38C C38 H38D 108.7 . . ? 
O2 C39 C38 107.4(11) . . ? 
O2 C39 H39A 110.2 . . ? 
C38 C39 H39A 110.2 . . ? 
O2 C39 H39B 110.2 . . ? 
C38 C39 H39B 110.2 . . ? 
H39A C39 H39B 108.5 . . ? 
O2 C39A C38 106.8(13) . . ? 
O2 C39A H39C 110.4 . . ? 
C38 C39A H39C 110.4 . . ? 
O2 C39A H39D 110.4 . . ? 
C38 C39A H39D 110.4 . . ? 
H39C C39A H39D 108.6 . . ? 
 
loop_ 
 _geom_torsion_atom_site_label_1 
 _geom_torsion_atom_site_label_2 
 _geom_torsion_atom_site_label_3 
 _geom_torsion_atom_site_label_4 
 _geom_torsion 
 _geom_torsion_site_symmetry_1 
 _geom_torsion_site_symmetry_2 
 _geom_torsion_site_symmetry_3 
 _geom_torsion_site_symmetry_4 
 _geom_torsion_publ_flag 
N2 Gd1 O1 C35 -178.9(6) . . . . ? 
N1 Gd1 O1 C35 -92.8(7) . . . . ? 
C1 Gd1 O1 C35 -157.2(7) . . . . ? 
I2 Gd1 O1 C35 3.5(7) . . . . ? 
I1 Gd1 O1 C35 98.7(6) . . . . ? 
N2 Gd1 O1 C32 30.5(9) . . . . ? 
N1 Gd1 O1 C32 116.7(7) . . . . ? 
C1 Gd1 O1 C32 52.3(7) . . . . ? 
I2 Gd1 O1 C32 -147.1(6) . . . . ? 
I1 Gd1 O1 C32 -51.9(6) . . . . ? 
C1 P1 N1 Si1 168.0(6) . . . . ? 
C8 P1 N1 Si1 -76.7(7) . . . . ? 
C2 P1 N1 Si1 41.7(7) . . . . ? 
C1 P1 N1 Gd1 -16.1(4) . . . . ? 
C8 P1 N1 Gd1 99.1(4) . . . . ? 
C2 P1 N1 Gd1 -142.4(3) . . . . ? 
C27 Si1 N1 P1 121.6(6) . . . . ? 
C26 Si1 N1 P1 -120.2(6) . . . . ? 
C28 Si1 N1 P1 1.9(8) . . . . ? 
C27 Si1 N1 Gd1 -53.0(6) . . . . ? 
C26 Si1 N1 Gd1 65.1(6) . . . . ? 
C28 Si1 N1 Gd1 -172.8(5) . . . . ? 
O1 Gd1 N1 P1 -78.0(3) . . . . ? 
N2 Gd1 N1 P1 71.4(4) . . . . ? 
C1 Gd1 N1 P1 11.2(3) . . . . ? 
I2 Gd1 N1 P1 178.1(3) . . . . ? 
I1 Gd1 N1 P1 -41.3(8) . . . . ? 
O1 Gd1 N1 Si1 97.8(5) . . . . ? 
N2 Gd1 N1 Si1 -112.7(5) . . . . ? 
C1 Gd1 N1 Si1 -172.9(6) . . . . ? 
I2 Gd1 N1 Si1 -6.1(5) . . . . ? 
I1 Gd1 N1 Si1 134.5(4) . . . . ? 
C1 P2 N2 Si2 -179.9(6) . . . . ? 
C20 P2 N2 Si2 -55.1(7) . . . . ? 
C14 P2 N2 Si2 63.1(7) . . . . ? 
C1 P2 N2 Gd1 9.1(4) . . . . ? 
C20 P2 N2 Gd1 134.0(3) . . . . ? 
C14 P2 N2 Gd1 -107.9(4) . . . . ? 
C30 Si2 N2 P2 -127.7(7) . . . . ? 
C29 Si2 N2 P2 115.6(7) . . . . ? 
C31 Si2 N2 P2 -6.6(8) . . . . ? 
C30 Si2 N2 Gd1 41.5(6) . . . . ? 
C29 Si2 N2 Gd1 -75.3(5) . . . . ? 
C31 Si2 N2 Gd1 162.5(4) . . . . ? 
O1 Gd1 N2 P2 17.7(6) . . . . ? 
N1 Gd1 N2 P2 -65.7(3) . . . . ? 
C1 Gd1 N2 P2 -6.3(3) . . . . ? 
I2 Gd1 N2 P2 -164.7(2) . . . . ? 
I1 Gd1 N2 P2 96.6(3) . . . . ? 
O1 Gd1 N2 Si2 -154.6(4) . . . . ? 
N1 Gd1 N2 Si2 122.0(4) . . . . ? 
C1 Gd1 N2 Si2 -178.6(5) . . . . ? 
I2 Gd1 N2 Si2 23.0(4) . . . . ? 
I1 Gd1 N2 Si2 -75.6(4) . . . . ? 
N1 P1 C1 P2 -69.0(6) . . . . ? 
C8 P1 C1 P2 170.0(6) . . . . ? 
C2 P1 C1 P2 55.0(7) . . . . ? 
N1 P1 C1 Gd1 14.5(4) . . . . ? 
C8 P1 C1 Gd1 -106.5(4) . . . . ? 
C2 P1 C1 Gd1 138.5(4) . . . . ? 
N2 P2 C1 P1 75.6(6) . . . . ? 
C20 P2 C1 P1 -49.6(7) . . . . ? 
C14 P2 C1 P1 -163.7(5) . . . . ? 
N2 P2 C1 Gd1 -8.1(4) . . . . ? 
C20 P2 C1 Gd1 -133.3(3) . . . . ? 
C14 P2 C1 Gd1 112.6(3) . . . . ? 
O1 Gd1 C1 P1 74.4(3) . . . . ? 
N2 Gd1 C1 P1 -117.6(4) . . . . ? 
N1 Gd1 C1 P1 -10.1(3) . . . . ? 
I2 Gd1 C1 P1 -47.0(7) . . . . ? 
I1 Gd1 C1 P1 154.3(2) . . . . ? 
O1 Gd1 C1 P2 -162.3(3) . . . . ? 
N2 Gd1 C1 P2 5.7(3) . . . . ? 
N1 Gd1 C1 P2 113.1(4) . . . . ? 
I2 Gd1 C1 P2 76.3(5) . . . . ? 
I1 Gd1 C1 P2 -82.4(3) . . . . ? 
N1 P1 C2 C7 -146.8(7) . . . . ? 
C1 P1 C2 C7 91.4(7) . . . . ? 
C8 P1 C2 C7 -23.4(8) . . . . ? 
N1 P1 C2 C3 33.4(7) . . . . ? 
C1 P1 C2 C3 -88.5(7) . . . . ? 
C8 P1 C2 C3 156.7(7) . . . . ? 
C7 C2 C3 C4 0.3(13) . . . . ? 
P1 C2 C3 C4 -179.8(7) . . . . ? 
C2 C3 C4 C5 -0.3(14) . . . . ? 
C3 C4 C5 C6 0.1(14) . . . . ? 
C4 C5 C6 C7 0.2(14) . . . . ? 
C3 C2 C7 C6 0.0(12) . . . . ? 
P1 C2 C7 C6 -179.9(6) . . . . ? 
C5 C6 C7 C2 -0.2(13) . . . . ? 
N1 P1 C8 C13 -162.5(7) . . . . ? 
C1 P1 C8 C13 -45.8(8) . . . . ? 
C2 P1 C8 C13 75.7(8) . . . . ? 
N1 P1 C8 C9 14.4(8) . . . . ? 
C1 P1 C8 C9 131.0(7) . . . . ? 
C2 P1 C8 C9 -107.4(8) . . . . ? 
C13 C8 C9 C10 -0.4(14) . . . . ? 
P1 C8 C9 C10 -177.2(7) . . . . ? 
C8 C9 C10 C11 1.0(15) . . . . ? 
C9 C10 C11 C12 -1.3(16) . . . . ? 
C10 C11 C12 C13 0.9(15) . . . . ? 
C9 C8 C13 C12 -0.1(14) . . . . ? 
P1 C8 C13 C12 176.7(7) . . . . ? 
C11 C12 C13 C8 -0.2(14) . . . . ? 
N2 P2 C14 C19 -173.1(8) . . . . ? 
C1 P2 C14 C19 69.0(9) . . . . ? 
C20 P2 C14 C19 -50.3(9) . . . . ? 
N2 P2 C14 C15 7.6(9) . . . . ? 
C1 P2 C14 C15 -110.3(8) . . . . ? 
C20 P2 C14 C15 130.5(8) . . . . ? 
C19 C14 C15 C16 0.8(16) . . . . ? 
P2 C14 C15 C16 -179.9(8) . . . . ? 
C14 C15 C16 C17 0.3(16) . . . . ? 
C15 C16 C17 C18 -0.8(17) . . . . ? 
C16 C17 C18 C19 0.0(16) . . . . ? 
C15 C14 C19 C18 -1.6(15) . . . . ? 
P2 C14 C19 C18 179.2(8) . . . . ? 
C17 C18 C19 C14 1.1(16) . . . . ? 
N2 P2 C20 C21 6.0(8) . . . . ? 
C1 P2 C20 C21 128.4(7) . . . . ? 
C14 P2 C20 C21 -116.4(7) . . . . ? 
N2 P2 C20 C25 -172.3(6) . . . . ? 
C1 P2 C20 C25 -49.9(8) . . . . ? 
C14 P2 C20 C25 65.3(7) . . . . ? 
C25 C20 C21 C22 -4.4(12) . . . . ? 
P2 C20 C21 C22 177.3(6) . . . . ? 
C20 C21 C22 C23 0.4(13) . . . . ? 
C21 C22 C23 C24 2.8(13) . . . . ? 
C22 C23 C24 C25 -2.0(13) . . . . ? 
C23 C24 C25 C20 -2.1(13) . . . . ? 
C21 C20 C25 C24 5.3(12) . . . . ? 
P2 C20 C25 C24 -176.4(6) . . . . ? 
C35 O1 C32 C33 -29.5(9) . . . . ? 
Gd1 O1 C32 C33 124.3(7) . . . . ? 
O1 C32 C33 C34A 38.3(18) . . . . ? 
O1 C32 C33 C34 10.1(12) . . . . ? 
C32 C33 C34 C35 11.9(15) . . . . ? 
C34A C33 C34 C35 -72.0(17) . . . . ? 
C32 C33 C34A C35 -33(3) . . . . ? 
C34 C33 C34A C35 69.7(17) . . . . ? 
C32 O1 C35 C34 38.5(12) . . . . ? 
Gd1 O1 C35 C34 -117.7(10) . . . . ? 
C32 O1 C35 C34A 7(2) . . . . ? 
Gd1 O1 C35 C34A -149(2) . . . . ? 
C33 C34 C35 O1 -30.3(15) . . . . ? 
C33 C34 C35 C34A 71.5(17) . . . . ? 
C33 C34A C35 O1 17(3) . . . . ? 
C33 C34A C35 C34 -71.8(17) . . . . ? 
C39A O2 C36 C37 40(2) . . . . ? 
C39 O2 C36 C37 14.0(15) . . . . ? 
O2 C36 C37 C38 -32.7(12) . . . . ? 
C36 C37 C38 C39 38.2(15) . . . . ? 
C36 C37 C38 C39A 14(2) . . . . ? 
C39A O2 C39 C38 -74(2) . . . . ? 
C36 O2 C39 C38 11.0(19) . . . . ? 
C39A C38 C39 O2 73(2) . . . . ? 
C37 C38 C39 O2 -30.9(18) . . . . ? 
C39 O2 C39A C38 72(2) . . . . ? 
C36 O2 C39A C38 -30(3) . . . . ? 
C39 C38 C39A O2 -72(2) . . . . ? 
C37 C38 C39A O2 10(3) . . . . ? 
 
_diffrn_measured_fraction_theta_max    0.971 
_diffrn_reflns_theta_full              67.50 
_diffrn_measured_fraction_theta_full   0.999 
_refine_diff_density_max    1.949 
_refine_diff_density_min   -1.585 
_refine_diff_density_rms    0.213 

#=== END
 
data_1c 

_nottingham_internal_coll_name         GMSTLL
_nottingham_internal_coll_number       11205
_nottingham_internal_coll_client       GM/STL
_nottingham_internal_coll_type         hemisphere
_nottingham_internal_coll_frame_time   '5'
_nottingham_internal_coll_frame_width  '0.3'
_nottingham_internal_coll_frame_method '\w'
_nottingham_internal_coll_user         WL
_nottingham_internal_coll_date         26/02/2012
_nottingham_internal_coll_location     NOTTS
_nottingham_internal_NCS_number        ?
_nottingham_internal_process_user      WL
_nottingham_internal_process_date      26/02/2012
_nottingham_internal_solution_user     WL/DPM
_nottingham_internal_solution_date     26/02/2012
_nottingham_internal_refinement_user   WL/DPM
_nottingham_internal_refinement_date   27/02/2012
_nottingham_internal_validation_user   wl
_nottingham_internal_validation_date   28/2/2012
_nottingham_internal_archive_date      28/2/2012

_refine_special_details 
; 
Both THF molecules exhibited disorder of a single carbon atom each (C34/C34a and
C39/C39a). The occupancies of each disorder component were refined competitively
converging at ratios of 0.75(2):0.25(2) (C34:C34a) and 0.59(5):0.41(5) (C39:C39a).
The minor component atom C34a was refined isotropically.
; 
 
 
_audit_creation_method           'enCIFer editing of SHELXL97 CIF output'
_chemical_name_systematic 
; 
 ? 
; 
_chemical_name_common             ? 
_chemical_melting_point           ? 
_chemical_formula_moiety          'C35 H47 I2 N2 O P2 Si2 Tb, C4 H8 O' 
_chemical_formula_sum             'C39 H55 I2 N2 O2 P2 Si2 Tb' 
_chemical_formula_weight          1114.69 
  
 
loop_ 
 _atom_type_symbol 
 _atom_type_description 
 _atom_type_scat_dispersion_real 
 _atom_type_scat_dispersion_imag 
 _atom_type_scat_source 
 'C'  'C'   0.0033   0.0016 
 'International Tables Vol C Tables 4.2.6.8 and 6.1.1.4' 
 'H'  'H'   0.0000   0.0000 
 'International Tables Vol C Tables 4.2.6.8 and 6.1.1.4' 
 'I'  'I'  -0.4742   1.8119 
 'International Tables Vol C Tables 4.2.6.8 and 6.1.1.4' 
 'N'  'N'   0.0061   0.0033 
 'International Tables Vol C Tables 4.2.6.8 and 6.1.1.4' 
 'O'  'O'   0.0106   0.0060 
 'International Tables Vol C Tables 4.2.6.8 and 6.1.1.4' 
 'P'  'P'   0.1023   0.0942 
 'International Tables Vol C Tables 4.2.6.8 and 6.1.1.4' 
 'Si'  'Si'   0.0817   0.0704 
 'International Tables Vol C Tables 4.2.6.8 and 6.1.1.4' 
 'Tb'  'Tb'  -0.1723   4.1537 
 'International Tables Vol C Tables 4.2.6.8 and 6.1.1.4' 
 
_symmetry_cell_setting            'Monoclinic'
_symmetry_space_group_name_H-M    'P 21/c' 
_symmetry_space_group_name_Hall   '-P 2ybc' 
 
loop_ 
 _symmetry_equiv_pos_as_xyz 
 'x, y, z' 
 '-x, y+1/2, -z+1/2' 
 '-x, -y, -z' 
 'x, -y-1/2, z-1/2' 
 
_cell_length_a                    16.142(2) 
_cell_length_b                    19.415(3) 
_cell_length_c                    14.134(2) 
_cell_angle_alpha                 90.00 
_cell_angle_beta                  99.341(2) 
_cell_angle_gamma                 90.00 
_cell_volume                      4370.8(11) 
_cell_formula_units_Z             4 
_cell_measurement_temperature     90(2) 
_cell_measurement_reflns_used     13485
_cell_measurement_theta_min       2.34
_cell_measurement_theta_max       27.26

_exptl_crystal_description        'TABLET'
_exptl_crystal_colour             'COLOURLESS'
_exptl_crystal_size_min           0.18
_exptl_crystal_size_mid           0.33
_exptl_crystal_size_max           0.57  
_exptl_crystal_density_meas       ? 
_exptl_crystal_density_diffrn     1.694 
_exptl_crystal_density_method     'not measured' 
_exptl_crystal_F_000              2192 
_exptl_absorpt_coefficient_mu     3.193 
_exptl_absorpt_correction_type    multi-scan
_exptl_absorpt_correction_T_min   0.304
_exptl_absorpt_correction_T_max   0.43
_exptl_absorpt_process_details    'SADABS 2007/2'
 
_exptl_special_details 
; 
 ? 
; 
 
_diffrn_ambient_temperature       90(2) 
_diffrn_radiation_wavelength      0.71073 
_diffrn_radiation_type            MoK\a 
_diffrn_radiation_source          'fine-focus sealed tube'
_diffrn_radiation_monochromator   graphite
_diffrn_measurement_device_type   'Bruker SMART APEX CCD diffractometer'
_diffrn_measurement_method        '\w rotation with narrow frames'
_diffrn_detector_area_resol_mean  ?
_diffrn_standards_number          0
_diffrn_standards_interval_count  .
_diffrn_standards_interval_time   ?
_diffrn_standards_decay_%         0  
_diffrn_reflns_number             26058 
_diffrn_reflns_av_R_equivalents   0.0306 
_diffrn_reflns_av_sigmaI/netI     0.0338 
_diffrn_reflns_limit_h_min        -20 
_diffrn_reflns_limit_h_max        19 
_diffrn_reflns_limit_k_min        -24 
_diffrn_reflns_limit_k_max        23 
_diffrn_reflns_limit_l_min        -18 
_diffrn_reflns_limit_l_max        17 
_diffrn_reflns_theta_min          2.06 
_diffrn_reflns_theta_max          27.28 
_reflns_number_total              9666 
_reflns_number_gt                 8589 
_reflns_threshold_expression      I>2\s(I)

_computing_data_collection        'Bruker SMART version 5.625 (Bruker, 2001)' 
_computing_cell_refinement        'Bruker SAINT version 6.36A (Bruker, 2000)' 
_computing_data_reduction         'Bruker SAINT; SHELXTL (Sheldrick, 2008)' 
_computing_structure_solution     'SHELXS97 (Sheldrick, 2008)' 
_computing_structure_refinement   'SHELXL97 (Sheldrick, 2008)' 
_computing_molecular_graphics     'SHELXTL (Sheldrick, 2008)' 
_computing_publication_material   'enCIFer(Allen et al., 2004); PLATON (Spek, 2009)' 
 
_refine_ls_structure_factor_coef  Fsqd  
_refine_ls_matrix_type            full 
_refine_ls_weighting_scheme       calc  
_refine_ls_weighting_details 
 'calc w=1/[\s^2^(Fo^2^)+(0.0847P)^2^] where P=(Fo^2^+2Fc^2^)/3' 
_atom_sites_solution_primary      direct 
_atom_sites_solution_secondary    difmap 
_atom_sites_solution_hydrogens    'Geom, Me from difmap' 
_refine_ls_hydrogen_treatment     constr 
_refine_ls_extinction_method      none 
_refine_ls_extinction_coef        ? 
_refine_ls_number_reflns          9666 
_refine_ls_number_parameters      472 
_refine_ls_number_restraints      0 
_refine_ls_R_factor_all           0.0468 
_refine_ls_R_factor_gt            0.0420 
_refine_ls_wR_factor_ref          0.1144 
_refine_ls_wR_factor_gt           0.1101 
_refine_ls_goodness_of_fit_ref    1.038 
_refine_ls_restrained_S_all       1.038 
_refine_ls_shift/su_max           0.002 
_refine_ls_shift/su_mean          0.000 
 
loop_ 
 _atom_site_label 
 _atom_site_type_symbol 
 _atom_site_fract_x 
 _atom_site_fract_y 
 _atom_site_fract_z 
 _atom_site_U_iso_or_equiv 
 _atom_site_adp_type 
 _atom_site_occupancy 
 _atom_site_symmetry_multiplicity 
 _atom_site_calc_flag 
 _atom_site_refinement_flags 
 _atom_site_disorder_assembly 
 _atom_site_disorder_group 
Tb1 Tb 0.198421(11) 0.602205(8) 0.691802(12) 0.01435(7) Uani 1 1 d . . . 
I1 I 0.232122(15) 0.751818(12) 0.732948(19) 0.02109(8) Uani 1 1 d . . . 
I2 I 0.010977(16) 0.609106(13) 0.68736(2) 0.02294(8) Uani 1 1 d . . . 
P1 P 0.31764(6) 0.49265(5) 0.63334(7) 0.01447(19) Uani 1 1 d . . . 
P2 P 0.22854(6) 0.46841(5) 0.80640(7) 0.01382(18) Uani 1 1 d . . . 
Si1 Si 0.41895(6) 0.62425(5) 0.64070(8) 0.0165(2) Uani 1 1 d . . . 
Si2 Si 0.22190(7) 0.58589(5) 0.95161(8) 0.0174(2) Uani 1 1 d . . . 
O1 O 0.15489(17) 0.59893(13) 0.5237(2) 0.0195(6) Uani 1 1 d . A . 
N1 N 0.33328(19) 0.57301(16) 0.6536(2) 0.0157(6) Uani 1 1 d . . . 
N2 N 0.22413(19) 0.54644(15) 0.8414(2) 0.0154(6) Uani 1 1 d . . . 
C1 C 0.2289(2) 0.47062(18) 0.6829(3) 0.0153(7) Uani 1 1 d . . . 
H1 H 0.1854 0.4422 0.6420 0.018 Uiso 1 1 calc R . . 
C2 C 0.4113(2) 0.44313(19) 0.6768(3) 0.0184(7) Uani 1 1 d . . . 
C3 C 0.4638(2) 0.4662(2) 0.7590(3) 0.0187(7) Uani 1 1 d . . . 
H3 H 0.4498 0.5066 0.7908 0.022 Uiso 1 1 calc R . . 
C4 C 0.5368(2) 0.4298(2) 0.7945(3) 0.0245(8) Uani 1 1 d . . . 
H4 H 0.5728 0.4459 0.8499 0.029 Uiso 1 1 calc R . . 
C5 C 0.5569(3) 0.3706(2) 0.7492(3) 0.0268(9) Uani 1 1 d . . . 
H5 H 0.6062 0.3455 0.7737 0.032 Uiso 1 1 calc R . . 
C6 C 0.5043(3) 0.3478(2) 0.6674(3) 0.0265(9) Uani 1 1 d . . . 
H6 H 0.5182 0.3073 0.6355 0.032 Uiso 1 1 calc R . . 
C7 C 0.4321(3) 0.3838(2) 0.6323(3) 0.0203(8) Uani 1 1 d . . . 
H7 H 0.3963 0.3675 0.5768 0.024 Uiso 1 1 calc R . . 
C8 C 0.2903(2) 0.4716(2) 0.5073(3) 0.0182(7) Uani 1 1 d . . . 
C9 C 0.2526(3) 0.4093(2) 0.4771(3) 0.0220(8) Uani 1 1 d . . . 
H9 H 0.2431 0.3756 0.5229 0.026 Uiso 1 1 calc R . . 
C10 C 0.2287(3) 0.3961(2) 0.3796(3) 0.0266(9) Uani 1 1 d . . . 
H10 H 0.2031 0.3535 0.3590 0.032 Uiso 1 1 calc R . . 
C11 C 0.2424(3) 0.4457(2) 0.3120(3) 0.0288(9) Uani 1 1 d . . . 
H11 H 0.2257 0.4370 0.2455 0.035 Uiso 1 1 calc R . . 
C12 C 0.2801(3) 0.5068(2) 0.3424(3) 0.0265(9) Uani 1 1 d . . . 
H12 H 0.2895 0.5406 0.2967 0.032 Uiso 1 1 calc R . . 
C13 C 0.3045(2) 0.5198(2) 0.4392(3) 0.0206(8) Uani 1 1 d . . . 
H13 H 0.3312 0.5621 0.4593 0.025 Uiso 1 1 calc R . . 
C14 C 0.3174(2) 0.42133(19) 0.8714(3) 0.0168(7) Uani 1 1 d . . . 
C15 C 0.3355(2) 0.35549(19) 0.8411(3) 0.0187(7) Uani 1 1 d . . . 
H15 H 0.3038 0.3364 0.7848 0.022 Uiso 1 1 calc R . . 
C16 C 0.4002(2) 0.3181(2) 0.8941(3) 0.0211(8) Uani 1 1 d . . . 
H16 H 0.4111 0.2725 0.8750 0.025 Uiso 1 1 calc R . . 
C17 C 0.4490(2) 0.3459(2) 0.9740(3) 0.0225(8) Uani 1 1 d . . . 
H17 H 0.4930 0.3197 1.0099 0.027 Uiso 1 1 calc R . . 
C18 C 0.4333(2) 0.4129(2) 1.0015(3) 0.0207(8) Uani 1 1 d . . . 
H18 H 0.4670 0.4329 1.0559 0.025 Uiso 1 1 calc R . . 
C19 C 0.3685(2) 0.4502(2) 0.9496(3) 0.0181(7) Uani 1 1 d . . . 
H19 H 0.3588 0.4962 0.9678 0.022 Uiso 1 1 calc R . . 
C20 C 0.1371(2) 0.4199(2) 0.8246(3) 0.0169(7) Uani 1 1 d . . . 
C21 C 0.1293(3) 0.3492(2) 0.8075(3) 0.0222(8) Uani 1 1 d . . . 
H21 H 0.1735 0.3251 0.7851 0.027 Uiso 1 1 calc R . . 
C22 C 0.0587(3) 0.3138(2) 0.8224(3) 0.0273(9) Uani 1 1 d . . . 
H22 H 0.0548 0.2655 0.8114 0.033 Uiso 1 1 calc R . . 
C23 C -0.0067(3) 0.3488(2) 0.8537(3) 0.0283(9) Uani 1 1 d . . . 
H23 H -0.0558 0.3247 0.8637 0.034 Uiso 1 1 calc R . . 
C24 C -0.0002(3) 0.4184(3) 0.8702(3) 0.0294(9) Uani 1 1 d . . . 
H24 H -0.0447 0.4423 0.8922 0.035 Uiso 1 1 calc R . . 
C25 C 0.0704(2) 0.4540(2) 0.8550(3) 0.0231(8) Uani 1 1 d . . . 
H25 H 0.0735 0.5023 0.8654 0.028 Uiso 1 1 calc R . . 
C26 C 0.5061(2) 0.5788(2) 0.5948(3) 0.0235(8) Uani 1 1 d . . . 
H26A H 0.4837 0.5539 0.5358 0.035 Uiso 1 1 calc R . . 
H26B H 0.5326 0.5460 0.6432 0.035 Uiso 1 1 calc R . . 
H26C H 0.5479 0.6125 0.5813 0.035 Uiso 1 1 calc R . . 
C27 C 0.3850(2) 0.6950(2) 0.5541(3) 0.0208(8) Uani 1 1 d . . . 
H27A H 0.3689 0.6756 0.4897 0.031 Uiso 1 1 calc R . . 
H27B H 0.4313 0.7276 0.5541 0.031 Uiso 1 1 calc R . . 
H27C H 0.3368 0.7189 0.5730 0.031 Uiso 1 1 calc R . . 
C28 C 0.4627(2) 0.6639(2) 0.7585(3) 0.0243(8) Uani 1 1 d . . . 
H28A H 0.5030 0.6999 0.7488 0.036 Uiso 1 1 calc R . . 
H28B H 0.4911 0.6284 0.8013 0.036 Uiso 1 1 calc R . . 
H28C H 0.4170 0.6841 0.7873 0.036 Uiso 1 1 calc R . . 
C29 C 0.3193(3) 0.6375(2) 0.9833(3) 0.0247(8) Uani 1 1 d . . . 
H29A H 0.3208 0.6580 1.0470 0.037 Uiso 1 1 calc R . . 
H29B H 0.3202 0.6742 0.9359 0.037 Uiso 1 1 calc R . . 
H29C H 0.3683 0.6077 0.9838 0.037 Uiso 1 1 calc R . . 
C30 C 0.1317(3) 0.6461(2) 0.9423(3) 0.0260(9) Uani 1 1 d . . . 
H30A H 0.1383 0.6758 0.9990 0.039 Uiso 1 1 calc R . . 
H30B H 0.0795 0.6197 0.9382 0.039 Uiso 1 1 calc R . . 
H30C H 0.1298 0.6745 0.8847 0.039 Uiso 1 1 calc R . . 
C31 C 0.2131(3) 0.5253(2) 1.0529(3) 0.0240(8) Uani 1 1 d . . . 
H31A H 0.2652 0.4987 1.0686 0.036 Uiso 1 1 calc R . . 
H31B H 0.1659 0.4937 1.0338 0.036 Uiso 1 1 calc R . . 
H31C H 0.2035 0.5517 1.1093 0.036 Uiso 1 1 calc R . . 
C32 C 0.0943(2) 0.5518(2) 0.4703(3) 0.0238(8) Uani 1 1 d . A . 
H32A H 0.0684 0.5222 0.5146 0.029 Uiso 1 1 calc R . . 
H32B H 0.1215 0.5221 0.4275 0.029 Uiso 1 1 calc R . . 
C33 C 0.0286(3) 0.5982(2) 0.4123(4) 0.0302(10) Uani 1 1 d . . . 
H33C H -0.0041 0.5738 0.3570 0.036 Uiso 0.25(2) 1 calc PR A 2 
H33D H -0.0102 0.6185 0.4524 0.036 Uiso 0.25(2) 1 calc PR A 2 
H33A H -0.0242 0.5978 0.4395 0.036 Uiso 0.75(2) 1 calc PR A 1 
H33B H 0.0163 0.5829 0.3447 0.036 Uiso 0.75(2) 1 calc PR A 1 
C34 C 0.0685(4) 0.6714(3) 0.4197(6) 0.030(2) Uani 0.75(2) 1 d P A 1 
H34A H 0.0667 0.6920 0.3553 0.035 Uiso 0.75(2) 1 calc PR A 1 
H34B H 0.0389 0.7023 0.4588 0.035 Uiso 0.75(2) 1 calc PR A 1 
C34A C 0.0861(10) 0.6507(10) 0.3818(15) 0.017(5) Uiso 0.25(2) 1 d P A 2 
H34C H 0.0561 0.6947 0.3656 0.020 Uiso 0.25(2) 1 calc PR A 2 
H34D H 0.1092 0.6345 0.3249 0.020 Uiso 0.25(2) 1 calc PR A 2 
C35 C 0.1550(3) 0.6598(2) 0.4659(3) 0.0337(11) Uani 1 1 d . . . 
H35C H 0.2098 0.6652 0.4439 0.040 Uiso 0.25(2) 1 calc PR A 2 
H35D H 0.1445 0.7012 0.5031 0.040 Uiso 0.25(2) 1 calc PR A 2 
H35A H 0.1918 0.6533 0.4170 0.040 Uiso 0.75(2) 1 calc PR A 1 
H35B H 0.1757 0.6998 0.5064 0.040 Uiso 0.75(2) 1 calc PR A 1 
O2 O 0.2259(2) 0.28046(16) 0.6343(2) 0.0331(7) Uani 1 1 d . . . 
C36 C 0.1463(3) 0.2548(2) 0.5876(4) 0.0365(11) Uani 1 1 d . B . 
H36A H 0.1337 0.2717 0.5208 0.044 Uiso 1 1 calc R . . 
H36B H 0.1007 0.2697 0.6223 0.044 Uiso 1 1 calc R . . 
C37 C 0.1545(3) 0.1777(2) 0.5896(4) 0.0348(10) Uani 1 1 d . . . 
H37A H 0.1179 0.1562 0.5345 0.042 Uiso 1 1 calc R B . 
H37B H 0.1409 0.1583 0.6500 0.042 Uiso 1 1 calc R . . 
C38 C 0.2463(3) 0.1682(2) 0.5829(4) 0.0387(12) Uani 1 1 d . B . 
H38A H 0.2673 0.1229 0.6082 0.046 Uiso 0.59(5) 1 calc PR B 1 
H38B H 0.2567 0.1733 0.5161 0.046 Uiso 0.59(5) 1 calc PR B 1 
H38C H 0.2528 0.1536 0.5174 0.046 Uiso 0.41(5) 1 calc PR B 2 
H38D H 0.2717 0.1328 0.6290 0.046 Uiso 0.41(5) 1 calc PR B 2 
C39 C 0.2843(10) 0.2250(8) 0.6442(12) 0.032(3) Uani 0.59(5) 1 d P B 1 
H39A H 0.2965 0.2098 0.7119 0.038 Uiso 0.59(5) 1 calc PR B 1 
H39B H 0.3375 0.2397 0.6241 0.038 Uiso 0.59(5) 1 calc PR B 1 
C39A C 0.2887(12) 0.2382(11) 0.607(3) 0.041(7) Uani 0.41(5) 1 d P B 2 
H39C H 0.3367 0.2336 0.6597 0.049 Uiso 0.41(5) 1 calc PR B 2 
H39D H 0.3092 0.2575 0.5500 0.049 Uiso 0.41(5) 1 calc PR B 2 
 
loop_ 
 _atom_site_aniso_label 
 _atom_site_aniso_U_11 
 _atom_site_aniso_U_22 
 _atom_site_aniso_U_33 
 _atom_site_aniso_U_23 
 _atom_site_aniso_U_13 
 _atom_site_aniso_U_12 
Tb1 0.01683(11) 0.01677(11) 0.00986(11) 0.00096(6) 0.00345(7) 0.00108(6) 
I1 0.02545(15) 0.01839(14) 0.02088(15) -0.00131(9) 0.00808(11) -0.00078(9) 
I2 0.01777(14) 0.03019(15) 0.02126(16) -0.00044(10) 0.00439(11) 0.00210(9) 
P1 0.0176(4) 0.0181(4) 0.0085(4) -0.0001(3) 0.0044(3) 0.0003(3) 
P2 0.0165(4) 0.0166(4) 0.0090(4) 0.0004(3) 0.0039(3) 0.0000(3) 
Si1 0.0181(5) 0.0198(5) 0.0122(5) 0.0017(4) 0.0044(4) -0.0014(4) 
Si2 0.0230(5) 0.0193(5) 0.0108(5) -0.0013(4) 0.0053(4) 0.0007(4) 
O1 0.0236(14) 0.0234(14) 0.0106(14) 0.0025(10) 0.0002(11) -0.0034(10) 
N1 0.0201(15) 0.0186(15) 0.0093(15) -0.0005(12) 0.0047(11) 0.0006(12) 
N2 0.0196(15) 0.0178(15) 0.0095(15) 0.0007(12) 0.0045(11) -0.0004(12) 
C1 0.0181(17) 0.0175(17) 0.0104(18) -0.0008(13) 0.0028(13) -0.0014(13) 
C2 0.0224(18) 0.0200(18) 0.0141(19) 0.0040(14) 0.0072(14) -0.0004(14) 
C3 0.0214(18) 0.0223(18) 0.0135(19) 0.0039(14) 0.0057(14) 0.0010(15) 
C4 0.0216(19) 0.032(2) 0.020(2) 0.0080(17) 0.0024(15) -0.0001(16) 
C5 0.0219(19) 0.032(2) 0.028(2) 0.0115(18) 0.0111(17) 0.0079(17) 
C6 0.036(2) 0.024(2) 0.023(2) 0.0025(17) 0.0152(18) 0.0064(17) 
C7 0.028(2) 0.0226(18) 0.0123(19) 0.0014(15) 0.0083(15) 0.0016(15) 
C8 0.0176(17) 0.0241(19) 0.0131(19) 0.0005(14) 0.0037(13) 0.0043(14) 
C9 0.0228(19) 0.028(2) 0.016(2) -0.0053(16) 0.0046(15) -0.0009(16) 
C10 0.028(2) 0.036(2) 0.016(2) -0.0095(17) 0.0044(17) -0.0032(16) 
C11 0.028(2) 0.049(3) 0.009(2) -0.0065(18) 0.0029(15) -0.0027(19) 
C12 0.027(2) 0.039(2) 0.012(2) 0.0010(17) 0.0020(15) -0.0019(18) 
C13 0.0197(18) 0.029(2) 0.0134(19) 0.0014(15) 0.0035(14) 0.0012(15) 
C14 0.0195(17) 0.0203(18) 0.0115(18) 0.0040(14) 0.0054(14) 0.0020(14) 
C15 0.0218(18) 0.0215(18) 0.0134(19) -0.0005(14) 0.0051(14) -0.0023(14) 
C16 0.0250(19) 0.0219(19) 0.017(2) 0.0000(15) 0.0064(15) 0.0036(15) 
C17 0.0235(19) 0.026(2) 0.018(2) 0.0032(16) 0.0058(15) 0.0062(16) 
C18 0.0223(19) 0.0267(19) 0.0124(19) 0.0000(15) 0.0003(14) 0.0001(16) 
C19 0.0214(18) 0.0219(18) 0.0119(19) -0.0011(14) 0.0055(14) 0.0022(14) 
C20 0.0167(16) 0.0226(18) 0.0112(18) 0.0020(14) 0.0020(13) -0.0039(14) 
C21 0.0270(19) 0.027(2) 0.014(2) -0.0010(15) 0.0058(15) -0.0034(16) 
C22 0.033(2) 0.029(2) 0.019(2) 0.0038(17) 0.0014(17) -0.0081(17) 
C23 0.026(2) 0.041(2) 0.018(2) -0.0014(18) 0.0066(16) -0.0143(18) 
C24 0.024(2) 0.043(3) 0.023(2) -0.0050(19) 0.0104(17) -0.0035(19) 
C25 0.0249(19) 0.029(2) 0.018(2) -0.0012(16) 0.0090(16) 0.0005(16) 
C26 0.0217(19) 0.027(2) 0.024(2) 0.0025(17) 0.0094(16) 0.0021(16) 
C27 0.0244(19) 0.0235(19) 0.0153(19) 0.0024(15) 0.0063(14) -0.0037(15) 
C28 0.0240(19) 0.026(2) 0.022(2) -0.0015(16) 0.0013(16) -0.0047(16) 
C29 0.032(2) 0.0229(19) 0.018(2) -0.0017(16) 0.0018(16) -0.0038(17) 
C30 0.032(2) 0.029(2) 0.018(2) -0.0037(17) 0.0072(17) 0.0062(17) 
C31 0.029(2) 0.029(2) 0.016(2) 0.0043(16) 0.0094(16) 0.0033(16) 
C32 0.0221(19) 0.027(2) 0.021(2) -0.0021(16) -0.0008(15) -0.0031(16) 
C33 0.028(2) 0.035(2) 0.025(2) 0.0048(18) -0.0028(18) -0.0072(17) 
C34 0.030(3) 0.024(3) 0.032(4) 0.005(3) -0.005(3) -0.001(2) 
C35 0.048(3) 0.029(2) 0.020(2) 0.0102(18) -0.0042(19) -0.010(2) 
O2 0.0386(17) 0.0258(15) 0.0344(19) -0.0078(13) 0.0042(14) 0.0027(13) 
C36 0.040(3) 0.042(3) 0.025(3) -0.001(2) -0.002(2) 0.003(2) 
C37 0.043(3) 0.036(3) 0.026(2) 0.002(2) 0.007(2) -0.006(2) 
C38 0.057(3) 0.028(2) 0.038(3) -0.011(2) 0.026(2) -0.006(2) 
C39 0.034(5) 0.030(6) 0.034(7) 0.009(4) 0.012(5) -0.001(4) 
C39A 0.034(7) 0.019(8) 0.08(2) -0.004(9) 0.030(10) -0.001(6) 
 
_geom_special_details 
; 
 All esds (except the esd in the dihedral angle between two l.s. planes) 
 are estimated using the full covariance matrix.  The cell esds are taken 
 into account individually in the estimation of esds in distances, angles 
 and torsion angles; correlations between esds in cell parameters are only 
 used when they are defined by crystal symmetry.  An approximate (isotropic) 
 treatment of cell esds is used for estimating esds involving l.s. planes. 
; 
 
loop_ 
 _geom_bond_atom_site_label_1 
 _geom_bond_atom_site_label_2 
 _geom_bond_distance 
 _geom_bond_site_symmetry_2 
 _geom_bond_publ_flag 
Tb1 N2 2.351(3) . ? 
Tb1 O1 2.367(3) . ? 
Tb1 N1 2.394(3) . ? 
Tb1 C1 2.609(4) . ? 
Tb1 I1 2.9948(5) . ? 
Tb1 I2 3.0192(5) . ? 
P1 N1 1.599(3) . ? 
P1 C1 1.747(4) . ? 
P1 C8 1.812(4) . ? 
P1 C2 1.813(4) . ? 
P2 N2 1.599(3) . ? 
P2 C1 1.747(4) . ? 
P2 C20 1.805(4) . ? 
P2 C14 1.819(4) . ? 
Si1 N1 1.737(3) . ? 
Si1 C27 1.862(4) . ? 
Si1 C26 1.865(4) . ? 
Si1 C28 1.866(4) . ? 
Si2 N2 1.742(3) . ? 
Si2 C30 1.855(4) . ? 
Si2 C29 1.857(4) . ? 
Si2 C31 1.877(4) . ? 
O1 C35 1.438(5) . ? 
O1 C32 1.457(5) . ? 
C1 H1 1.0000 . ? 
C2 C7 1.380(5) . ? 
C2 C3 1.396(5) . ? 
C3 C4 1.396(5) . ? 
C3 H3 0.9500 . ? 
C4 C5 1.381(6) . ? 
C4 H4 0.9500 . ? 
C5 C6 1.390(6) . ? 
C5 H5 0.9500 . ? 
C6 C7 1.381(6) . ? 
C6 H6 0.9500 . ? 
C7 H7 0.9500 . ? 
C8 C13 1.387(5) . ? 
C8 C9 1.391(5) . ? 
C9 C10 1.393(6) . ? 
C9 H9 0.9500 . ? 
C10 C11 1.398(6) . ? 
C10 H10 0.9500 . ? 
C11 C12 1.371(6) . ? 
C11 H11 0.9500 . ? 
C12 C13 1.384(6) . ? 
C12 H12 0.9500 . ? 
C13 H13 0.9500 . ? 
C14 C19 1.385(5) . ? 
C14 C15 1.394(5) . ? 
C15 C16 1.388(5) . ? 
C15 H15 0.9500 . ? 
C16 C17 1.378(6) . ? 
C16 H16 0.9500 . ? 
C17 C18 1.392(5) . ? 
C17 H17 0.9500 . ? 
C18 C19 1.381(5) . ? 
C18 H18 0.9500 . ? 
C19 H19 0.9500 . ? 
C20 C25 1.389(5) . ? 
C20 C21 1.395(5) . ? 
C21 C22 1.376(6) . ? 
C21 H21 0.9500 . ? 
C22 C23 1.388(6) . ? 
C22 H22 0.9500 . ? 
C23 C24 1.372(6) . ? 
C23 H23 0.9500 . ? 
C24 C25 1.379(6) . ? 
C24 H24 0.9500 . ? 
C25 H25 0.9500 . ? 
C26 H26A 0.9800 . ? 
C26 H26B 0.9800 . ? 
C26 H26C 0.9800 . ? 
C27 H27A 0.9800 . ? 
C27 H27B 0.9800 . ? 
C27 H27C 0.9800 . ? 
C28 H28A 0.9800 . ? 
C28 H28B 0.9800 . ? 
C28 H28C 0.9800 . ? 
C29 H29A 0.9800 . ? 
C29 H29B 0.9800 . ? 
C29 H29C 0.9800 . ? 
C30 H30A 0.9800 . ? 
C30 H30B 0.9800 . ? 
C30 H30C 0.9800 . ? 
C31 H31A 0.9800 . ? 
C31 H31B 0.9800 . ? 
C31 H31C 0.9800 . ? 
C32 C33 1.525(6) . ? 
C32 H32A 0.9900 . ? 
C32 H32B 0.9900 . ? 
C33 C34A 1.489(16) . ? 
C33 C34 1.557(7) . ? 
C33 H33C 0.9900 . ? 
C33 H33D 0.9900 . ? 
C33 H33A 0.9900 . ? 
C33 H33B 0.9900 . ? 
C34 C35 1.459(7) . ? 
C34 H34A 0.9900 . ? 
C34 H34B 0.9900 . ? 
C34A C35 1.501(17) . ? 
C34A H34C 0.9900 . ? 
C34A H34D 0.9900 . ? 
C35 H35C 0.9900 . ? 
C35 H35D 0.9900 . ? 
C35 H35A 0.9900 . ? 
C35 H35B 0.9900 . ? 
O2 C39A 1.408(18) . ? 
O2 C39 1.423(13) . ? 
O2 C36 1.436(6) . ? 
C36 C37 1.502(6) . ? 
C36 H36A 0.9900 . ? 
C36 H36B 0.9900 . ? 
C37 C38 1.511(7) . ? 
C37 H37A 0.9900 . ? 
C37 H37B 0.9900 . ? 
C38 C39 1.472(16) . ? 
C38 C39A 1.533(19) . ? 
C38 H38A 0.9900 . ? 
C38 H38B 0.9900 . ? 
C38 H38C 0.9900 . ? 
C38 H38D 0.9900 . ? 
C39 H39A 0.9900 . ? 
C39 H39B 0.9900 . ? 
C39A H39C 0.9900 . ? 
C39A H39D 0.9900 . ? 
 
loop_ 
 _geom_angle_atom_site_label_1 
 _geom_angle_atom_site_label_2 
 _geom_angle_atom_site_label_3 
 _geom_angle 
 _geom_angle_site_symmetry_1 
 _geom_angle_site_symmetry_3 
 _geom_angle_publ_flag 
N2 Tb1 O1 150.52(10) . . ? 
N2 Tb1 N1 93.40(10) . . ? 
O1 Tb1 N1 84.27(10) . . ? 
N2 Tb1 C1 65.50(11) . . ? 
O1 Tb1 C1 87.30(10) . . ? 
N1 Tb1 C1 64.64(11) . . ? 
N2 Tb1 I1 105.79(7) . . ? 
O1 Tb1 I1 103.65(6) . . ? 
N1 Tb1 I1 97.48(7) . . ? 
C1 Tb1 I1 158.35(8) . . ? 
N2 Tb1 I2 93.97(7) . . ? 
O1 Tb1 I2 81.20(7) . . ? 
N1 Tb1 I2 161.92(8) . . ? 
C1 Tb1 I2 103.82(8) . . ? 
I1 Tb1 I2 96.364(9) . . ? 
N1 P1 C1 106.42(17) . . ? 
N1 P1 C8 113.76(17) . . ? 
C1 P1 C8 104.77(17) . . ? 
N1 P1 C2 110.98(17) . . ? 
C1 P1 C2 115.31(17) . . ? 
C8 P1 C2 105.65(18) . . ? 
N2 P2 C1 107.05(17) . . ? 
N2 P2 C20 111.85(17) . . ? 
C1 P2 C20 106.90(18) . . ? 
N2 P2 C14 113.03(17) . . ? 
C1 P2 C14 112.72(17) . . ? 
C20 P2 C14 105.20(17) . . ? 
N1 Si1 C27 109.69(17) . . ? 
N1 Si1 C26 115.10(17) . . ? 
C27 Si1 C26 106.20(19) . . ? 
N1 Si1 C28 109.55(17) . . ? 
C27 Si1 C28 108.11(19) . . ? 
C26 Si1 C28 107.9(2) . . ? 
N2 Si2 C30 110.08(18) . . ? 
N2 Si2 C29 108.28(18) . . ? 
C30 Si2 C29 107.5(2) . . ? 
N2 Si2 C31 114.95(17) . . ? 
C30 Si2 C31 107.07(19) . . ? 
C29 Si2 C31 108.71(19) . . ? 
C35 O1 C32 106.5(3) . . ? 
C35 O1 Tb1 121.4(2) . . ? 
C32 O1 Tb1 127.0(2) . . ? 
P1 N1 Si1 130.16(19) . . ? 
P1 N1 Tb1 98.55(14) . . ? 
Si1 N1 Tb1 131.05(16) . . ? 
P2 N2 Si2 134.6(2) . . ? 
P2 N2 Tb1 99.71(15) . . ? 
Si2 N2 Tb1 125.14(16) . . ? 
P1 C1 P2 122.9(2) . . ? 
P1 C1 Tb1 87.31(14) . . ? 
P2 C1 Tb1 86.82(14) . . ? 
P1 C1 H1 116.6 . . ? 
P2 C1 H1 116.6 . . ? 
Tb1 C1 H1 116.6 . . ? 
C7 C2 C3 119.2(4) . . ? 
C7 C2 P1 122.7(3) . . ? 
C3 C2 P1 118.2(3) . . ? 
C4 C3 C2 120.0(4) . . ? 
C4 C3 H3 120.0 . . ? 
C2 C3 H3 120.0 . . ? 
C5 C4 C3 120.2(4) . . ? 
C5 C4 H4 119.9 . . ? 
C3 C4 H4 119.9 . . ? 
C4 C5 C6 119.6(4) . . ? 
C4 C5 H5 120.2 . . ? 
C6 C5 H5 120.2 . . ? 
C7 C6 C5 120.2(4) . . ? 
C7 C6 H6 119.9 . . ? 
C5 C6 H6 119.9 . . ? 
C2 C7 C6 120.8(4) . . ? 
C2 C7 H7 119.6 . . ? 
C6 C7 H7 119.6 . . ? 
C13 C8 C9 119.2(4) . . ? 
C13 C8 P1 119.3(3) . . ? 
C9 C8 P1 121.5(3) . . ? 
C8 C9 C10 120.0(4) . . ? 
C8 C9 H9 120.0 . . ? 
C10 C9 H9 120.0 . . ? 
C9 C10 C11 120.0(4) . . ? 
C9 C10 H10 120.0 . . ? 
C11 C10 H10 120.0 . . ? 
C12 C11 C10 119.6(4) . . ? 
C12 C11 H11 120.2 . . ? 
C10 C11 H11 120.2 . . ? 
C11 C12 C13 120.5(4) . . ? 
C11 C12 H12 119.8 . . ? 
C13 C12 H12 119.8 . . ? 
C12 C13 C8 120.7(4) . . ? 
C12 C13 H13 119.6 . . ? 
C8 C13 H13 119.6 . . ? 
C19 C14 C15 119.2(3) . . ? 
C19 C14 P2 121.2(3) . . ? 
C15 C14 P2 119.6(3) . . ? 
C16 C15 C14 119.4(4) . . ? 
C16 C15 H15 120.3 . . ? 
C14 C15 H15 120.3 . . ? 
C17 C16 C15 121.1(4) . . ? 
C17 C16 H16 119.4 . . ? 
C15 C16 H16 119.4 . . ? 
C16 C17 C18 119.3(4) . . ? 
C16 C17 H17 120.4 . . ? 
C18 C17 H17 120.4 . . ? 
C19 C18 C17 119.9(4) . . ? 
C19 C18 H18 120.1 . . ? 
C17 C18 H18 120.1 . . ? 
C18 C19 C14 120.9(4) . . ? 
C18 C19 H19 119.6 . . ? 
C14 C19 H19 119.6 . . ? 
C25 C20 C21 118.0(3) . . ? 
C25 C20 P2 119.2(3) . . ? 
C21 C20 P2 122.8(3) . . ? 
C22 C21 C20 121.3(4) . . ? 
C22 C21 H21 119.4 . . ? 
C20 C21 H21 119.4 . . ? 
C21 C22 C23 119.7(4) . . ? 
C21 C22 H22 120.1 . . ? 
C23 C22 H22 120.1 . . ? 
C24 C23 C22 119.7(4) . . ? 
C24 C23 H23 120.2 . . ? 
C22 C23 H23 120.2 . . ? 
C23 C24 C25 120.6(4) . . ? 
C23 C24 H24 119.7 . . ? 
C25 C24 H24 119.7 . . ? 
C24 C25 C20 120.7(4) . . ? 
C24 C25 H25 119.6 . . ? 
C20 C25 H25 119.6 . . ? 
Si1 C26 H26A 109.5 . . ? 
Si1 C26 H26B 109.5 . . ? 
H26A C26 H26B 109.5 . . ? 
Si1 C26 H26C 109.5 . . ? 
H26A C26 H26C 109.5 . . ? 
H26B C26 H26C 109.5 . . ? 
Si1 C27 H27A 109.5 . . ? 
Si1 C27 H27B 109.5 . . ? 
H27A C27 H27B 109.5 . . ? 
Si1 C27 H27C 109.5 . . ? 
H27A C27 H27C 109.5 . . ? 
H27B C27 H27C 109.5 . . ? 
Si1 C28 H28A 109.5 . . ? 
Si1 C28 H28B 109.5 . . ? 
H28A C28 H28B 109.5 . . ? 
Si1 C28 H28C 109.5 . . ? 
H28A C28 H28C 109.5 . . ? 
H28B C28 H28C 109.5 . . ? 
Si2 C29 H29A 109.5 . . ? 
Si2 C29 H29B 109.5 . . ? 
H29A C29 H29B 109.5 . . ? 
Si2 C29 H29C 109.5 . . ? 
H29A C29 H29C 109.5 . . ? 
H29B C29 H29C 109.5 . . ? 
Si2 C30 H30A 109.5 . . ? 
Si2 C30 H30B 109.5 . . ? 
H30A C30 H30B 109.5 . . ? 
Si2 C30 H30C 109.5 . . ? 
H30A C30 H30C 109.5 . . ? 
H30B C30 H30C 109.5 . . ? 
Si2 C31 H31A 109.5 . . ? 
Si2 C31 H31B 109.5 . . ? 
H31A C31 H31B 109.5 . . ? 
Si2 C31 H31C 109.5 . . ? 
H31A C31 H31C 109.5 . . ? 
H31B C31 H31C 109.5 . . ? 
O1 C32 C33 104.9(3) . . ? 
O1 C32 H32A 110.8 . . ? 
C33 C32 H32A 110.8 . . ? 
O1 C32 H32B 110.8 . . ? 
C33 C32 H32B 110.8 . . ? 
H32A C32 H32B 108.8 . . ? 
C34A C33 C32 98.5(7) . . ?  
C32 C33 C34 105.0(4) . . ? 
C34A C33 H33C 112.1 . . ? 
C32 C33 H33C 112.1 . . ? 
C34 C33 H33C 130.7 . . ? 
C34A C33 H33D 112.1 . . ? 
C32 C33 H33D 112.1 . . ? 
C34 C33 H33D 83.9 . . ? 
H33C C33 H33D 109.7 . . ? 
C34A C33 H33A 137.2 . . ? 
C32 C33 H33A 110.7 . . ? 
C34 C33 H33A 110.7 . . ? 
H33C C33 H33A 85.5 . . ?  
C34A C33 H33B 87.8 . . ? 
C32 C33 H33B 110.7 . . ? 
C34 C33 H33B 110.7 . . ?  
H33D C33 H33B 128.7 . . ? 
H33A C33 H33B 108.8 . . ? 
C35 C34 C33 104.2(4) . . ? 
C35 C34 H34A 110.9 . . ? 
C33 C34 H34A 110.9 . . ? 
C35 C34 H34B 110.9 . . ? 
C33 C34 H34B 110.9 . . ? 
H34A C34 H34B 108.9 . . ? 
C33 C34A C35 105.5(11) . . ? 
C33 C34A H34C 110.6 . . ? 
C35 C34A H34C 110.6 . . ? 
C33 C34A H34D 110.6 . . ? 
C35 C34A H34D 110.6 . . ? 
H34C C34A H34D 108.8 . . ? 
O1 C35 C34 107.0(4) . . ? 
O1 C35 C34A 106.5(7) . . ?  
O1 C35 H35C 110.4 . . ? 
C34 C35 H35C 133.0 . . ? 
C34A C35 H35C 110.4 . . ? 
O1 C35 H35D 110.4 . . ? 
C34 C35 H35D 83.1 . . ? 
C34A C35 H35D 110.4 . . ? 
H35C C35 H35D 108.6 . . ? 
O1 C35 H35A 110.3 . . ? 
C34 C35 H35A 110.3 . . ? 
C34A C35 H35A 83.4 . . ?  
H35D C35 H35A 130.4 . . ? 
O1 C35 H35B 110.3 . . ? 
C34 C35 H35B 110.3 . . ? 
C34A C35 H35B 133.5 . . ? 
H35C C35 H35B 82.1 . . ?  
H35A C35 H35B 108.6 . . ?  
C39A O2 C36 107.5(11) . . ? 
C39 O2 C36 108.1(7) . . ? 
O2 C36 C37 105.5(4) . . ? 
O2 C36 H36A 110.6 . . ? 
C37 C36 H36A 110.6 . . ? 
O2 C36 H36B 110.6 . . ? 
C37 C36 H36B 110.6 . . ? 
H36A C36 H36B 108.8 . . ? 
C36 C37 C38 101.8(4) . . ? 
C36 C37 H37A 111.4 . . ? 
C38 C37 H37A 111.4 . . ? 
C36 C37 H37B 111.4 . . ? 
C38 C37 H37B 111.4 . . ? 
H37A C37 H37B 109.3 . . ? 
C39 C38 C37 101.0(7) . . ?  
C37 C38 C39A 106.6(7) . . ? 
C39 C38 H38A 111.6 . . ? 
C37 C38 H38A 111.6 . . ? 
C39A C38 H38A 126.4 . . ? 
C39 C38 H38B 111.6 . . ? 
C37 C38 H38B 111.6 . . ? 
C39A C38 H38B 89.0 . . ? 
H38A C38 H38B 109.4 . . ? 
C39 C38 H38C 131.9 . . ? 
C37 C38 H38C 110.4 . . ? 
C39A C38 H38C 110.4 . . ? 
H38A C38 H38C 89.9 . . ?  
C39 C38 H38D 92.5 . . ? 
C37 C38 H38D 110.4 . . ? 
C39A C38 H38D 110.4 . . ?  
H38B C38 H38D 125.5 . . ? 
H38C C38 H38D 108.6 . . ? 
O2 C39 C38 107.6(9) . . ? 
O2 C39 H39A 110.2 . . ? 
C38 C39 H39A 110.2 . . ? 
O2 C39 H39B 110.2 . . ? 
C38 C39 H39B 110.2 . . ? 
H39A C39 H39B 108.5 . . ? 
O2 C39A C38 105.2(12) . . ? 
O2 C39A H39C 110.7 . . ? 
C38 C39A H39C 110.7 . . ? 
O2 C39A H39D 110.7 . . ? 
C38 C39A H39D 110.7 . . ? 
H39C C39A H39D 108.8 . . ? 
 
loop_ 
 _geom_torsion_atom_site_label_1 
 _geom_torsion_atom_site_label_2 
 _geom_torsion_atom_site_label_3 
 _geom_torsion_atom_site_label_4 
 _geom_torsion 
 _geom_torsion_site_symmetry_1 
 _geom_torsion_site_symmetry_2 
 _geom_torsion_site_symmetry_3 
 _geom_torsion_site_symmetry_4 
 _geom_torsion_publ_flag 
N2 Tb1 O1 C35 -179.1(3) . . . . ? 
N1 Tb1 O1 C35 -92.3(3) . . . . ? 
C1 Tb1 O1 C35 -157.1(3) . . . . ? 
I1 Tb1 O1 C35 4.0(3) . . . . ? 
I2 Tb1 O1 C35 98.5(3) . . . . ? 
N2 Tb1 O1 C32 29.7(4) . . . . ? 
N1 Tb1 O1 C32 116.4(3) . . . . ? 
C1 Tb1 O1 C32 51.6(3) . . . . ? 
I1 Tb1 O1 C32 -147.3(3) . . . . ? 
I2 Tb1 O1 C32 -52.8(3) . . . . ? 
C1 P1 N1 Si1 168.7(2) . . . . ? 
C8 P1 N1 Si1 -76.5(3) . . . . ? 
C2 P1 N1 Si1 42.5(3) . . . . ? 
C1 P1 N1 Tb1 -16.57(18) . . . . ? 
C8 P1 N1 Tb1 98.28(16) . . . . ? 
C2 P1 N1 Tb1 -142.75(15) . . . . ? 
C27 Si1 N1 P1 120.3(3) . . . . ? 
C26 Si1 N1 P1 0.7(3) . . . . ? 
C28 Si1 N1 P1 -121.2(3) . . . . ? 
C27 Si1 N1 Tb1 -52.8(3) . . . . ? 
C26 Si1 N1 Tb1 -172.4(2) . . . . ? 
C28 Si1 N1 Tb1 65.7(3) . . . . ? 
N2 Tb1 N1 P1 72.49(15) . . . . ? 
O1 Tb1 N1 P1 -78.03(14) . . . . ? 
C1 Tb1 N1 P1 11.69(13) . . . . ? 
I1 Tb1 N1 P1 178.91(12) . . . . ? 
I2 Tb1 N1 P1 -41.4(3) . . . . ? 
N2 Tb1 N1 Si1 -112.8(2) . . . . ? 
O1 Tb1 N1 Si1 96.7(2) . . . . ? 
C1 Tb1 N1 Si1 -173.6(3) . . . . ? 
I1 Tb1 N1 Si1 -6.4(2) . . . . ? 
I2 Tb1 N1 Si1 133.27(18) . . . . ? 
C1 P2 N2 Si2 -179.7(2) . . . . ? 
C20 P2 N2 Si2 63.5(3) . . . . ? 
C14 P2 N2 Si2 -55.0(3) . . . . ? 
C1 P2 N2 Tb1 9.18(18) . . . . ? 
C20 P2 N2 Tb1 -107.60(16) . . . . ? 
C14 P2 N2 Tb1 133.88(15) . . . . ? 
C30 Si2 N2 P2 -127.6(3) . . . . ? 
C29 Si2 N2 P2 115.2(3) . . . . ? 
C31 Si2 N2 P2 -6.6(3) . . . . ? 
C30 Si2 N2 Tb1 41.7(2) . . . . ? 
C29 Si2 N2 Tb1 -75.6(2) . . . . ? 
C31 Si2 N2 Tb1 162.66(18) . . . . ? 
O1 Tb1 N2 P2 17.8(3) . . . . ? 
N1 Tb1 N2 P2 -66.54(15) . . . . ? 
C1 Tb1 N2 P2 -6.45(12) . . . . ? 
I1 Tb1 N2 P2 -165.30(10) . . . . ? 
I2 Tb1 N2 P2 96.94(12) . . . . ? 
O1 Tb1 N2 Si2 -154.43(17) . . . . ? 
N1 Tb1 N2 Si2 121.21(19) . . . . ? 
C1 Tb1 N2 Si2 -178.7(2) . . . . ? 
I1 Tb1 N2 Si2 22.45(19) . . . . ? 
I2 Tb1 N2 Si2 -75.32(18) . . . . ? 
N1 P1 C1 P2 -69.4(3) . . . . ? 
C8 P1 C1 P2 169.7(2) . . . . ? 
C2 P1 C1 P2 54.1(3) . . . . ? 
N1 P1 C1 Tb1 15.02(17) . . . . ? 
C8 P1 C1 Tb1 -105.78(15) . . . . ? 
C2 P1 C1 Tb1 138.54(15) . . . . ? 
N2 P2 C1 P1 76.6(3) . . . . ? 
C20 P2 C1 P1 -163.4(2) . . . . ? 
C14 P2 C1 P1 -48.3(3) . . . . ? 
N2 P2 C1 Tb1 -8.16(16) . . . . ? 
C20 P2 C1 Tb1 111.84(15) . . . . ? 
C14 P2 C1 Tb1 -133.05(15) . . . . ? 
N2 Tb1 C1 P1 -117.33(16) . . . . ? 
O1 Tb1 C1 P1 74.35(14) . . . . ? 
N1 Tb1 C1 P1 -10.59(12) . . . . ? 
I1 Tb1 C1 P1 -47.1(3) . . . . ? 
I2 Tb1 C1 P1 154.61(10) . . . . ? 
N2 Tb1 C1 P2 5.82(11) . . . . ? 
O1 Tb1 C1 P2 -162.50(14) . . . . ? 
N1 Tb1 C1 P2 112.57(16) . . . . ? 
I1 Tb1 C1 P2 76.1(3) . . . . ? 
I2 Tb1 C1 P2 -82.24(12) . . . . ? 
N1 P1 C2 C7 -147.1(3) . . . . ? 
C1 P1 C2 C7 91.8(4) . . . . ? 
C8 P1 C2 C7 -23.4(4) . . . . ? 
N1 P1 C2 C3 33.3(3) . . . . ? 
C1 P1 C2 C3 -87.8(3) . . . . ? 
C8 P1 C2 C3 157.0(3) . . . . ? 
C7 C2 C3 C4 0.8(5) . . . . ? 
P1 C2 C3 C4 -179.6(3) . . . . ? 
C2 C3 C4 C5 -0.8(6) . . . . ? 
C3 C4 C5 C6 0.8(6) . . . . ? 
C4 C5 C6 C7 -0.7(6) . . . . ? 
C3 C2 C7 C6 -0.8(6) . . . . ? 
P1 C2 C7 C6 179.6(3) . . . . ? 
C5 C6 C7 C2 0.8(6) . . . . ? 
N1 P1 C8 C13 15.5(4) . . . . ? 
C1 P1 C8 C13 131.3(3) . . . . ? 
C2 P1 C8 C13 -106.5(3) . . . . ? 
N1 P1 C8 C9 -162.0(3) . . . . ? 
C1 P1 C8 C9 -46.2(4) . . . . ? 
C2 P1 C8 C9 76.0(3) . . . . ? 
C13 C8 C9 C10 -0.6(6) . . . . ? 
P1 C8 C9 C10 176.8(3) . . . . ? 
C8 C9 C10 C11 -0.2(6) . . . . ? 
C9 C10 C11 C12 0.6(6) . . . . ? 
C10 C11 C12 C13 -0.1(6) . . . . ? 
C11 C12 C13 C8 -0.8(6) . . . . ? 
C9 C8 C13 C12 1.1(6) . . . . ? 
P1 C8 C13 C12 -176.4(3) . . . . ? 
N2 P2 C14 C19 6.8(4) . . . . ? 
C1 P2 C14 C19 128.3(3) . . . . ? 
C20 P2 C14 C19 -115.6(3) . . . . ? 
N2 P2 C14 C15 -172.2(3) . . . . ? 
C1 P2 C14 C15 -50.6(3) . . . . ? 
C20 P2 C14 C15 65.5(3) . . . . ? 
C19 C14 C15 C16 4.9(5) . . . . ? 
P2 C14 C15 C16 -176.2(3) . . . . ? 
C14 C15 C16 C17 -2.6(6) . . . . ? 
C15 C16 C17 C18 -0.4(6) . . . . ? 
C16 C17 C18 C19 0.9(6) . . . . ? 
C17 C18 C19 C14 1.4(6) . . . . ? 
C15 C14 C19 C18 -4.3(6) . . . . ? 
P2 C14 C19 C18 176.7(3) . . . . ? 
N2 P2 C20 C25 7.0(4) . . . . ? 
C1 P2 C20 C25 -109.9(3) . . . . ? 
C14 P2 C20 C25 130.1(3) . . . . ? 
N2 P2 C20 C21 -174.4(3) . . . . ? 
C1 P2 C20 C21 68.8(4) . . . . ? 
C14 P2 C20 C21 -51.3(4) . . . . ? 
C25 C20 C21 C22 -1.6(6) . . . . ? 
P2 C20 C21 C22 179.8(3) . . . . ? 
C20 C21 C22 C23 1.0(6) . . . . ? 
C21 C22 C23 C24 -0.5(7) . . . . ? 
C22 C23 C24 C25 0.7(7) . . . . ? 
C23 C24 C25 C20 -1.3(7) . . . . ? 
C21 C20 C25 C24 1.7(6) . . . . ? 
P2 C20 C25 C24 -179.6(3) . . . . ? 
C35 O1 C32 C33 -30.3(4) . . . . ? 
Tb1 O1 C32 C33 124.4(3) . . . . ? 
O1 C32 C33 C34A 41.5(10) . . . . ? 
O1 C32 C33 C34 12.8(6) . . . . ? 
C34A C33 C34 C35 -71.8(14) . . . . ? 
C32 C33 C34 C35 8.5(7) . . . . ? 
C32 C33 C34A C35 -37.4(14) . . . . ? 
C34 C33 C34A C35 68.3(16) . . . . ? 
C32 O1 C35 C34 37.1(6) . . . . ? 
Tb1 O1 C35 C34 -119.3(5) . . . . ? 
C32 O1 C35 C34A 6.0(10) . . . . ? 
Tb1 O1 C35 C34A -150.4(10) . . . . ? 
C33 C34 C35 O1 -27.4(7) . . . . ? 
C33 C34 C35 C34A 66.3(13) . . . . ? 
C33 C34A C35 O1 21.1(15) . . . . ? 
C33 C34A C35 C34 -74.4(15) . . . . ? 
C39A O2 C36 C37 38.2(19) . . . . ? 
C39 O2 C36 C37 12.4(10) . . . . ? 
O2 C36 C37 C38 -32.3(5) . . . . ? 
C36 C37 C38 C39 39.1(9) . . . . ? 
C36 C37 C38 C39A 16.1(19) . . . . ? 
C39A O2 C39 C38 -79(3) . . . . ? 
C36 O2 C39 C38 13.4(15) . . . . ? 
C37 C38 C39 O2 -33.1(14) . . . . ? 
C39A C38 C39 O2 74(3) . . . . ? 
C39 O2 C39A C38 69(3) . . . . ? 
C36 O2 C39A C38 -27(3) . . . . ? 
C39 C38 C39A O2 -73(3) . . . . ? 
C37 C38 C39A O2 6(3) . . . . ? 
 
_diffrn_measured_fraction_theta_max    0.984 
_diffrn_reflns_theta_full              27.28 
_diffrn_measured_fraction_theta_full   0.984 
_refine_diff_density_max    3.337 
_refine_diff_density_min   -3.637 
_refine_diff_density_rms    0.237 

#=== End
 
data_2
 
_nottingham_internal_coll_name         GMSTLD
_nottingham_internal_coll_number       10914
_nottingham_internal_coll_client       GM/STL
_nottingham_internal_coll_type         custom
_nottingham_internal_coll_frame_time   '240 and 60'
_nottingham_internal_coll_frame_width  '1.00'
_nottingham_internal_coll_frame_method '\w scans'
_nottingham_internal_coll_user         DPM
_nottingham_internal_coll_date         25/11/2011
_nottingham_internal_process_user      DPM
_nottingham_internal_process_date      28/11/2011
_nottingham_internal_solution_user     WL/DPM
_nottingham_internal_solution_date     25/11/2011
_nottingham_internal_refinement_user   WL/DPM
_nottingham_internal_refinement_date   01/03/2012
_nottingham_internal_validation_user   AJB
_nottingham_internal_validation_date   1/10/2013
_nottingham_internal_archive_date      ?

_refine_special_details 
; 
Global DELU applied. Lattice toluene molecule was disordered over two
sets of positions.The occupancies of each disorder component were 
refined competitively, converging at a ratio of 0.476(15):0.524(15) 
(C32-C38:C39-C45). Both components were refined isotropically and 
are subject to a SIMU restraint and SADI restraints to both 
aliphatic and aromatic C-C distances.
; 

# start Validation Reply Form
_vrf_PLAT973_gmstld
;
PROBLEM: Large Calcd. Positive Residual Density on La1 1.63 eA-3
RESPONSE: Residual electron density is close to La and of no chemical
significance, and is present depsite applying the correct abdorption 
correction.
;
# end Validation Reply Form
 
_audit_creation_method
;
CrysAlisPro, Oxford Diffraction Ltd.,
Version 1.171.35.19 (release 27-10-2011 CrysAlis171 .NET)
(compiled Oct 27 2011,15:02:11)
; 
_chemical_name_systematic 
; 
 ? 
; 
_chemical_name_common             ? 
_chemical_melting_point           ? 
_chemical_formula_moiety          'C62 H78 I4 La2 N4 P4 Si4, 2(C7 H8)' 
_chemical_formula_sum             'C76 H94 I4 La2 N4 P4 Si4'
_chemical_formula_weight          2085.21  
 
loop_ 
 _atom_type_symbol 
 _atom_type_description 
 _atom_type_scat_dispersion_real 
 _atom_type_scat_dispersion_imag 
 _atom_type_scat_source 
 'C'  'C'   0.0181   0.0091 
 'International Tables Vol C Tables 4.2.6.8 and 6.1.1.4' 
 'H'  'H'   0.0000   0.0000 
 'International Tables Vol C Tables 4.2.6.8 and 6.1.1.4' 
 'I'  'I'  -0.3257   6.8362 
 'International Tables Vol C Tables 4.2.6.8 and 6.1.1.4' 
 'La'  'La'  -1.4094   9.0376 
 'International Tables Vol C Tables 4.2.6.8 and 6.1.1.4' 
 'N'  'N'   0.0311   0.0180 
 'International Tables Vol C Tables 4.2.6.8 and 6.1.1.4' 
 'P'  'P'   0.2955   0.4335 
 'International Tables Vol C Tables 4.2.6.8 and 6.1.1.4' 
 'Si'  'Si'   0.2541   0.3302 
 'International Tables Vol C Tables 4.2.6.8 and 6.1.1.4' 
 
_symmetry_cell_setting            monoclinic
_symmetry_space_group_name_H-M    'C 2/c' 
_symmetry_space_group_name_Hall   '-C 2yc' 
 
loop_ 
 _symmetry_equiv_pos_as_xyz 
 'x, y, z' 
 '-x, y, -z+1/2' 
 'x+1/2, y+1/2, z' 
 '-x+1/2, y+1/2, -z+1/2' 
 '-x, -y, -z' 
 'x, -y, z-1/2' 
 '-x+1/2, -y+1/2, -z' 
 'x+1/2, -y+1/2, z-1/2' 
 
_cell_length_a                    36.332(2) 
_cell_length_b                    12.8545(4) 
_cell_length_c                    21.6820(13) 
_cell_angle_alpha                 90.00 
_cell_angle_beta                  122.332(9) 
_cell_angle_gamma                 90.00 
_cell_volume                      8556.3(11) 
_cell_formula_units_Z             4 
_cell_measurement_temperature     90(2) 
_cell_measurement_reflns_used     10797
_cell_measurement_theta_min       3.72
_cell_measurement_theta_max       74.49 
 
_exptl_crystal_description        plate 
_exptl_crystal_colour             colourless 
_exptl_crystal_size_max           0.237
_exptl_crystal_size_mid           0.155
_exptl_crystal_size_min           0.022  
_exptl_crystal_density_meas       ? 
_exptl_crystal_density_diffrn     1.619 
_exptl_crystal_density_method     ? 
_exptl_crystal_F_000              4080 
_exptl_absorpt_coefficient_mu     20.494 
_exptl_absorpt_correction_type    'gaussian'
_exptl_absorpt_correction_T_min   0.087
_exptl_absorpt_correction_T_max   0.852 
_exptl_absorpt_process_details    
;
CrysAlisPro, Agilent Technologies,
Version 1.171.35.19 (release 27-10-2011 CrysAlis171 .NET)
(compiled Oct 27 2011,15:02:11)
Analytical numeric absorption correction using a multifaceted crystal 
model based on expressions derived by R.C. Clark & J.S. Reid. 
(Clark, R. C. & Reid, J. S. (1995). Acta Cryst. A51, 887-897) 
; 
 
_exptl_special_details 
; 
 ? 
; 
 
_diffrn_ambient_temperature       90(2)
_diffrn_radiation_wavelength      1.5418
_diffrn_radiation_type            'Cu K\a'
_diffrn_radiation_source          'SuperNova (Cu) X-ray Source'
_diffrn_radiation_monochromator   'mirror'
_diffrn_measurement_device_type   'SuperNova, Single source at offset), Atlas'
_diffrn_measurement_method        '\w scans'
_diffrn_detector_area_resol_mean  10.3613
_diffrn_standards_number          0
_diffrn_standards_interval_count  .
_diffrn_standards_decay_%         0  
_diffrn_reflns_number             25755 
_diffrn_reflns_av_R_equivalents   0.076
_diffrn_reflns_av_sigmaI/netI     0.058
_diffrn_reflns_limit_h_min       -45 
_diffrn_reflns_limit_h_max        41 
_diffrn_reflns_limit_k_min       -16 
_diffrn_reflns_limit_k_max        11 
_diffrn_reflns_limit_l_min       -26 
_diffrn_reflns_limit_l_max        27 
_diffrn_reflns_theta_min          3.73 
_diffrn_reflns_theta_max          74.66 
_reflns_number_total              8532 
_reflns_number_gt                 6688 
_reflns_threshold_expression      I>2\s(I)

_computing_data_collection       
;
CrysAlisPro, Agilent Technologies,
Version 1.171.35.19 (release 27-10-2011 CrysAlis171 .NET)
(compiled Oct 27 2011,15:02:11)
;
_computing_cell_refinement       
;
CrysAlisPro, Agilent Technologies,
Version 1.171.35.19 (release 27-10-2011 CrysAlis171 .NET)
(compiled Oct 27 2011,15:02:11)
;
_computing_data_reduction        
;
CrysAlisPro, Agilent Technologies,
Version 1.171.35.19 (release 27-10-2011 CrysAlis171 .NET)
(compiled Oct 27 2011,15:02:11)
;
_computing_structure_solution    'SHELXS97 (Sheldrick, 2008)' 
_computing_structure_refinement  'SHELXL97 (Sheldrick, 2008)'
_computing_molecular_graphics    'SHELXTL (Sheldrick, 2008)' 
_computing_publication_material  
  'enCIFer(Allen et al.,2004);PLATON(Spek,2003)'  
 
_refine_ls_structure_factor_coef  Fsqd  
_refine_ls_matrix_type            full 
_refine_ls_weighting_scheme       calc  
_refine_ls_weighting_details 
 'calc w=1/[\s^2^(Fo^2^)+(0.077P)^2^+167.0P] where P=(Fo^2^+2Fc^2^)/3' 
_atom_sites_solution_primary      direct 
_atom_sites_solution_secondary    difmap 
_atom_sites_solution_hydrogens   'geom, Me from difmap' 
_refine_ls_hydrogen_treatment     constr 
_refine_ls_extinction_method      none 
_refine_ls_extinction_coef        ? 
_refine_ls_number_reflns          8532 
_refine_ls_number_parameters      426 
_refine_ls_number_restraints      153 
_refine_ls_R_factor_all           0.0771 
_refine_ls_R_factor_gt            0.0570 
_refine_ls_wR_factor_ref          0.158 
_refine_ls_wR_factor_gt           0.146
_refine_ls_goodness_of_fit_ref    1.04
_refine_ls_restrained_S_all       1.03 
_refine_ls_shift/su_max           0.001 
_refine_ls_shift/su_mean          0.000 
 
loop_ 
 _atom_site_label 
 _atom_site_type_symbol 
 _atom_site_fract_x 
 _atom_site_fract_y 
 _atom_site_fract_z 
 _atom_site_U_iso_or_equiv 
 _atom_site_adp_type 
 _atom_site_occupancy 
 _atom_site_symmetry_multiplicity 
 _atom_site_calc_flag 
 _atom_site_refinement_flags 
 _atom_site_disorder_assembly 
 _atom_site_disorder_group 
La1 La 0.670391(13) 0.25465(3) 0.45954(2) 0.01583(12) Uani 1 1 d U . . 
I1 I 0.597563(16) 0.20839(5) 0.29810(3) 0.03008(16) Uani 1 1 d U . . 
I2 I 0.766079(15) 0.26314(4) 0.60650(2) 0.02378(14) Uani 1 1 d U . . 
P1 P 0.63220(7) 0.16244(16) 0.55157(12) 0.0238(4) Uani 1 1 d U . . 
P2 P 0.62349(6) 0.40628(15) 0.51348(10) 0.0195(4) Uani 1 1 d U . . 
Si1 Si 0.66275(8) -0.02144(18) 0.50153(12) 0.0256(5) Uani 1 1 d U . . 
Si2 Si 0.65311(9) 0.54223(19) 0.43275(13) 0.0313(5) Uani 1 1 d U . . 
N1 N 0.6506(2) 0.1081(5) 0.5065(4) 0.0210(11) Uani 1 1 d U . . 
N2 N 0.6445(2) 0.4288(5) 0.4660(3) 0.0212(10) Uani 1 1 d U . . 
C1 C 0.6461(2) 0.2919(6) 0.5593(4) 0.0204(11) Uani 1 1 d U . . 
H1 H 0.6724 0.3064 0.6087 0.024 Uiso 1 1 calc R . . 
C2 C 0.6573(3) 0.1079(7) 0.6431(5) 0.0344(17) Uani 1 1 d U . . 
C3 C 0.6959(4) 0.1490(8) 0.6998(5) 0.046(2) Uani 1 1 d U . . 
H3 H 0.7077 0.2093 0.6914 0.055 Uiso 1 1 calc R . . 
C4 C 0.7178(5) 0.1038(10) 0.7692(6) 0.066(3) Uani 1 1 d U . . 
H4 H 0.7445 0.1323 0.8076 0.079 Uiso 1 1 calc R . . 
C5 C 0.7001(6) 0.0175(10) 0.7808(7) 0.079(4) Uani 1 1 d U . . 
H5 H 0.7141 -0.0121 0.8283 0.095 Uiso 1 1 calc R . . 
C6 C 0.6625(6) -0.0269(9) 0.7253(8) 0.069(3) Uani 1 1 d U . . 
H6 H 0.6513 -0.0882 0.7340 0.083 Uiso 1 1 calc R . . 
C7 C 0.6406(4) 0.0190(8) 0.6553(7) 0.051(2) Uani 1 1 d U . . 
H7 H 0.6144 -0.0111 0.6166 0.062 Uiso 1 1 calc R . . 
C8 C 0.5738(3) 0.1434(7) 0.5065(6) 0.0382(19) Uani 1 1 d U . . 
C9 C 0.5532(4) 0.1480(8) 0.5455(8) 0.052(3) Uani 1 1 d U . . 
H9 H 0.5695 0.1583 0.5969 0.063 Uiso 1 1 calc R . . 
C10 C 0.5085(4) 0.1371(10) 0.5071(10) 0.069(3) Uani 1 1 d U . . 
H10 H 0.4938 0.1412 0.5325 0.082 Uiso 1 1 calc R . . 
C11 C 0.4850(4) 0.1207(8) 0.4336(9) 0.061(3) Uani 1 1 d U . . 
H11 H 0.4543 0.1127 0.4088 0.073 Uiso 1 1 calc R . . 
C12 C 0.5054(3) 0.1154(8) 0.3940(8) 0.053(2) Uani 1 1 d U . . 
H12 H 0.4889 0.1048 0.3427 0.063 Uiso 1 1 calc R . . 
C13 C 0.5501(3) 0.1262(7) 0.4322(6) 0.038(2) Uani 1 1 d U . . 
H13 H 0.5648 0.1217 0.4069 0.046 Uiso 1 1 calc R . . 
C14 C 0.6347(2) 0.5090(6) 0.5786(4) 0.0231(15) Uani 1 1 d U . . 
C15 C 0.6686(3) 0.4989(8) 0.6524(5) 0.038(2) Uani 1 1 d U . . 
H15 H 0.6857 0.4373 0.6686 0.046 Uiso 1 1 calc R . . 
C16 C 0.6770(3) 0.5791(8) 0.7014(5) 0.049(3) Uani 1 1 d U . . 
H16 H 0.7002 0.5725 0.7509 0.059 Uiso 1 1 calc R . . 
C17 C 0.6519(3) 0.6681(8) 0.6785(5) 0.043(2) Uani 1 1 d U . . 
H17 H 0.6576 0.7223 0.7122 0.052 Uiso 1 1 calc R . . 
C18 C 0.6186(3) 0.6781(7) 0.6064(5) 0.037(2) Uani 1 1 d U . . 
H18 H 0.6016 0.7397 0.5904 0.044 Uiso 1 1 calc R . . 
C19 C 0.6098(3) 0.5992(7) 0.5572(4) 0.0273(17) Uani 1 1 d U . . 
H19 H 0.5865 0.6068 0.5079 0.033 Uiso 1 1 calc R . . 
C20 C 0.5648(2) 0.4010(7) 0.4573(5) 0.0279(17) Uani 1 1 d U . . 
C21 C 0.5406(3) 0.3977(8) 0.4893(5) 0.037(2) Uani 1 1 d U . . 
H21 H 0.5548 0.3997 0.5409 0.044 Uiso 1 1 calc R . . 
C22 C 0.4954(3) 0.3912(9) 0.4460(7) 0.048(3) Uani 1 1 d U . . 
H22 H 0.4787 0.3899 0.4679 0.057 Uiso 1 1 calc R . . 
C23 C 0.4749(3) 0.3868(8) 0.3711(6) 0.044(2) Uani 1 1 d U . . 
H23 H 0.4440 0.3817 0.3415 0.053 Uiso 1 1 calc R . . 
C24 C 0.4988(3) 0.3896(8) 0.3389(6) 0.044(2) Uani 1 1 d U . . 
H24 H 0.4844 0.3878 0.2872 0.053 Uiso 1 1 calc R . . 
C25 C 0.5440(3) 0.3949(8) 0.3820(5) 0.0341(19) Uani 1 1 d U . . 
H25 H 0.5606 0.3943 0.3599 0.041 Uiso 1 1 calc R . . 
C26 C 0.6839(3) -0.0227(8) 0.4398(5) 0.037(2) Uani 1 1 d U . . 
H26A H 0.6629 0.0120 0.3938 0.056 Uiso 1 1 calc R . . 
H26B H 0.6880 -0.0948 0.4299 0.056 Uiso 1 1 calc R . . 
H26C H 0.7118 0.0141 0.4632 0.056 Uiso 1 1 calc R . . 
C27 C 0.7062(3) -0.0745(7) 0.5914(5) 0.0353(19) Uani 1 1 d U . . 
H27A H 0.7302 -0.0243 0.6156 0.053 Uiso 1 1 calc R . . 
H27B H 0.7171 -0.1400 0.5840 0.053 Uiso 1 1 calc R . . 
H27C H 0.6943 -0.0870 0.6220 0.053 Uiso 1 1 calc R . . 
C28 C 0.6133(4) -0.1063(8) 0.4622(6) 0.045(2) Uani 1 1 d U . . 
H28A H 0.6013 -0.1031 0.4934 0.068 Uiso 1 1 calc R . . 
H28B H 0.6213 -0.1782 0.4596 0.068 Uiso 1 1 calc R . . 
H28C H 0.5913 -0.0818 0.4131 0.068 Uiso 1 1 calc R . . 
C29 C 0.6939(4) 0.6269(8) 0.5091(6) 0.046(2) Uani 1 1 d U . . 
H29A H 0.6830 0.6459 0.5402 0.069 Uiso 1 1 calc R . . 
H29B H 0.6987 0.6901 0.4889 0.069 Uiso 1 1 calc R . . 
H29C H 0.7215 0.5891 0.5380 0.069 Uiso 1 1 calc R . . 
C30 C 0.6766(4) 0.5032(8) 0.3783(6) 0.046(2) Uani 1 1 d U . . 
H30A H 0.7040 0.4656 0.4096 0.069 Uiso 1 1 calc R . . 
H30B H 0.6823 0.5655 0.3586 0.069 Uiso 1 1 calc R . . 
H30C H 0.6560 0.4581 0.3381 0.069 Uiso 1 1 calc R . . 
C31 C 0.6012(4) 0.6153(9) 0.3725(6) 0.055(3) Uani 1 1 d U . . 
H31A H 0.5815 0.5727 0.3298 0.082 Uiso 1 1 calc R . . 
H31B H 0.6077 0.6802 0.3564 0.082 Uiso 1 1 calc R . . 
H31C H 0.5874 0.6312 0.3997 0.082 Uiso 1 1 calc R . . 
C32 C 0.6031(9) 0.359(2) 0.6990(17) 0.070(8) Uiso 0.478(15) 1 d PDU A 1 
H32A H 0.6331 0.3466 0.7396 0.104 Uiso 0.478(15) 1 calc PR A 1 
H32B H 0.5937 0.4282 0.7042 0.104 Uiso 0.478(15) 1 calc PR A 1 
H32C H 0.6019 0.3554 0.6527 0.104 Uiso 0.478(15) 1 calc PR A 1 
C33 C 0.5756(7) 0.2836(19) 0.6995(16) 0.061(6) Uiso 0.478(15) 1 d PDU A 1 
C34 C 0.5930(7) 0.1877(17) 0.7325(13) 0.051(5) Uiso 0.478(15) 1 d PDU A 1 
H34 H 0.6231 0.1734 0.7532 0.062 Uiso 0.478(15) 1 calc PR A 1 
C35 C 0.5655(7) 0.112(2) 0.7349(15) 0.061(6) Uiso 0.478(15) 1 d PDU A 1 
H35 H 0.5777 0.0478 0.7593 0.073 Uiso 0.478(15) 1 calc PR A 1 
C36 C 0.5222(8) 0.129(2) 0.7033(15) 0.067(6) Uiso 0.478(15) 1 d PDU A 1 
H36 H 0.5039 0.0753 0.7024 0.081 Uiso 0.478(15) 1 calc PR A 1 
C37 C 0.5054(9) 0.223(2) 0.6730(17) 0.068(6) Uiso 0.478(15) 1 d PDU A 1 
H37 H 0.4755 0.2363 0.6541 0.082 Uiso 0.478(15) 1 calc PR A 1 
C38 C 0.5312(8) 0.302(2) 0.6685(19) 0.073(7) Uiso 0.478(15) 1 d PDU A 1 
H38 H 0.5184 0.3659 0.6449 0.088 Uiso 0.478(15) 1 calc PR A 1 
C39 C 0.4957(7) 0.308(2) 0.6491(14) 0.060(6) Uiso 0.522(15) 1 d PDU A 2 
H39A H 0.4771 0.2591 0.6097 0.089 Uiso 0.522(15) 1 calc PR A 2 
H39B H 0.4942 0.3765 0.6285 0.089 Uiso 0.522(15) 1 calc PR A 2 
H39C H 0.4857 0.3125 0.6830 0.089 Uiso 0.522(15) 1 calc PR A 2 
C40 C 0.5388(6) 0.2719(13) 0.6866(11) 0.035(4) Uiso 0.522(15) 1 d PDU A 2 
C41 C 0.5512(5) 0.1738(14) 0.7194(10) 0.037(4) Uiso 0.522(15) 1 d PDU A 2 
H41 H 0.5290 0.1301 0.7154 0.045 Uiso 0.522(15) 1 calc PR A 2 
C42 C 0.5942(5) 0.1344(15) 0.7580(10) 0.040(4) Uiso 0.522(15) 1 d PDU A 2 
H42 H 0.6012 0.0676 0.7801 0.049 Uiso 0.522(15) 1 calc PR A 2 
C43 C 0.6246(6) 0.1989(12) 0.7610(11) 0.040(4) Uiso 0.522(15) 1 d PDU A 2 
H43 H 0.6540 0.1759 0.7873 0.048 Uiso 0.522(15) 1 calc PR A 2 
C44 C 0.6160(5) 0.2939(13) 0.7289(9) 0.033(4) Uiso 0.522(15) 1 d PDU A 2 
H44 H 0.6384 0.3336 0.7302 0.040 Uiso 0.522(15) 1 calc PR A 2 
C45 C 0.5729(5) 0.3330(16) 0.6936(11) 0.040(4) Uiso 0.522(15) 1 d PDU A 2 
H45 H 0.5670 0.4015 0.6742 0.048 Uiso 0.522(15) 1 calc PR A 2 
 
loop_ 
 _atom_site_aniso_label 
 _atom_site_aniso_U_11 
 _atom_site_aniso_U_22 
 _atom_site_aniso_U_33 
 _atom_site_aniso_U_23 
 _atom_site_aniso_U_13 
 _atom_site_aniso_U_12 
La1 0.0193(2) 0.0131(2) 0.0150(2) -0.00060(15) 0.00917(17) 0.00146(15) 
I1 0.0248(3) 0.0370(3) 0.0190(2) -0.0074(2) 0.0054(2) 0.0041(2) 
I2 0.0211(2) 0.0375(3) 0.0126(2) -0.00357(18) 0.00890(19) -0.00273(19) 
P1 0.0348(10) 0.0166(10) 0.0321(10) -0.0067(8) 0.0259(9) -0.0062(8) 
P2 0.0185(8) 0.0171(10) 0.0190(8) -0.0053(7) 0.0076(7) 0.0016(7) 
Si1 0.0404(12) 0.0144(11) 0.0281(11) -0.0014(8) 0.0223(10) 0.0006(9) 
Si2 0.0545(15) 0.0173(12) 0.0258(11) 0.0040(9) 0.0239(11) 0.0059(10) 
N1 0.029(3) 0.016(2) 0.023(3) -0.005(2) 0.018(3) -0.005(2) 
N2 0.029(3) 0.012(2) 0.021(3) -0.0031(18) 0.012(2) 0.004(2) 
C1 0.023(3) 0.017(2) 0.021(3) -0.004(2) 0.011(3) -0.003(2) 
C2 0.069(5) 0.020(4) 0.038(3) -0.004(3) 0.045(3) -0.006(4) 
C3 0.078(6) 0.035(6) 0.031(3) 0.003(3) 0.034(3) -0.009(4) 
C4 0.111(9) 0.056(8) 0.035(4) 0.016(5) 0.041(4) 0.002(6) 
C5 0.176(12) 0.034(7) 0.055(5) 0.014(5) 0.081(6) 0.008(7) 
C6 0.162(11) 0.017(5) 0.089(6) 0.005(4) 0.107(7) -0.002(6) 
C7 0.099(7) 0.026(5) 0.073(5) -0.005(4) 0.075(5) -0.012(5) 
C8 0.039(3) 0.021(5) 0.067(4) -0.019(4) 0.037(3) -0.012(3) 
C9 0.062(5) 0.033(6) 0.096(6) -0.031(6) 0.065(5) -0.027(5) 
C10 0.063(6) 0.049(7) 0.134(8) -0.031(8) 0.080(7) -0.025(6) 
C11 0.043(5) 0.021(6) 0.128(8) -0.011(7) 0.052(5) -0.005(5) 
C12 0.036(4) 0.028(6) 0.088(6) -0.009(6) 0.029(4) -0.009(4) 
C13 0.032(3) 0.021(5) 0.061(4) -0.010(4) 0.025(3) 0.000(4) 
C14 0.020(3) 0.019(3) 0.022(3) -0.007(3) 0.006(3) 0.003(3) 
C15 0.040(5) 0.029(5) 0.023(3) -0.007(3) 0.002(3) 0.010(4) 
C16 0.051(6) 0.030(5) 0.026(4) -0.014(3) -0.006(4) 0.004(4) 
C17 0.046(5) 0.035(5) 0.032(4) -0.016(4) 0.010(4) 0.002(4) 
C18 0.044(5) 0.017(4) 0.036(4) -0.008(3) 0.013(4) 0.012(4) 
C19 0.030(4) 0.024(4) 0.021(3) -0.006(3) 0.009(3) 0.006(3) 
C20 0.017(2) 0.022(4) 0.033(3) -0.015(3) 0.005(2) 0.001(3) 
C21 0.022(3) 0.041(6) 0.042(4) -0.026(4) 0.014(3) -0.003(4) 
C22 0.024(3) 0.053(7) 0.064(5) -0.031(5) 0.022(4) -0.005(4) 
C23 0.014(3) 0.035(6) 0.060(5) -0.016(5) 0.003(3) 0.000(4) 
C24 0.028(4) 0.039(6) 0.039(4) -0.018(4) 0.001(3) -0.003(4) 
C25 0.024(3) 0.035(5) 0.028(3) -0.005(4) 0.004(3) 0.002(4) 
C26 0.055(6) 0.033(5) 0.034(4) -0.001(4) 0.030(4) 0.015(4) 
C27 0.053(5) 0.021(5) 0.032(4) 0.008(3) 0.024(3) 0.004(4) 
C28 0.053(5) 0.021(4) 0.057(6) -0.013(4) 0.026(4) -0.010(4) 
C29 0.069(6) 0.031(5) 0.057(5) -0.015(4) 0.047(4) -0.022(4) 
C30 0.090(8) 0.019(5) 0.050(6) 0.003(4) 0.051(6) 0.001(4) 
C31 0.091(6) 0.034(6) 0.033(5) 0.017(4) 0.029(4) 0.033(5) 
 
_geom_special_details 
; 
 All esds (except the esd in the dihedral angle between two l.s. planes) 
 are estimated using the full covariance matrix.  The cell esds are taken 
 into account individually in the estimation of esds in distances, angles 
 and torsion angles; correlations between esds in cell parameters are only 
 used when they are defined by crystal symmetry.  An approximate (isotropic) 
 treatment of cell esds is used for estimating esds involving l.s. planes. 
; 
 
loop_ 
 _geom_bond_atom_site_label_1 
 _geom_bond_atom_site_label_2 
 _geom_bond_distance 
 _geom_bond_site_symmetry_2 
 _geom_bond_publ_flag 
La1 N1 2.426(6) . ? 
La1 N2 2.460(6) . ? 
La1 C1 2.778(8) . ? 
La1 I1 3.1144(7) . ? 
La1 I2 3.2253(8) . ? 
La1 I2 3.3114(6) 7_656 ? 
I2 La1 3.3114(6) 7_656 ? 
P1 N1 1.610(6) . ? 
P1 C1 1.722(8) . ? 
P1 C8 1.816(9) . ? 
P1 C2 1.824(10) . ? 
P2 N2 1.603(7) . ? 
P2 C1 1.718(8) . ? 
P2 C20 1.804(8) . ? 
P2 C14 1.814(8) . ? 
Si1 N1 1.740(7) . ? 
Si1 C27 1.861(9) . ? 
Si1 C26 1.866(9) . ? 
Si1 C28 1.873(10) . ? 
Si2 N2 1.728(7) . ? 
Si2 C30 1.859(10) . ? 
Si2 C29 1.870(11) . ? 
Si2 C31 1.872(11) . ? 
C1 H1 1.0000 . ? 
C2 C3 1.382(15) . ? 
C2 C7 1.385(13) . ? 
C3 C4 1.398(14) . ? 
C3 H3 0.9500 . ? 
C4 C5 1.372(19) . ? 
C4 H4 0.9500 . ? 
C5 C6 1.37(2) . ? 
C5 H5 0.9500 . ? 
C6 C7 1.413(18) . ? 
C6 H6 0.9500 . ? 
C7 H7 0.9500 . ? 
C8 C13 1.379(15) . ? 
C8 C9 1.399(14) . ? 
C9 C10 1.380(16) . ? 
C9 H9 0.9500 . ? 
C10 C11 1.36(2) . ? 
C10 H10 0.9500 . ? 
C11 C12 1.405(18) . ? 
C11 H11 0.9500 . ? 
C12 C13 1.381(13) . ? 
C12 H12 0.9500 . ? 
C13 H13 0.9500 . ? 
C14 C19 1.387(11) . ? 
C14 C15 1.409(11) . ? 
C15 C16 1.391(13) . ? 
C15 H15 0.9500 . ? 
C16 C17 1.380(15) . ? 
C16 H16 0.9500 . ? 
C17 C18 1.379(13) . ? 
C17 H17 0.9500 . ? 
C18 C19 1.379(11) . ? 
C18 H18 0.9500 . ? 
C19 H19 0.9500 . ? 
C20 C21 1.383(13) . ? 
C20 C25 1.386(12) . ? 
C21 C22 1.391(12) . ? 
C21 H21 0.9500 . ? 
C22 C23 1.379(16) . ? 
C22 H22 0.9500 . ? 
C23 C24 1.375(16) . ? 
C23 H23 0.9500 . ? 
C24 C25 1.392(12) . ? 
C24 H24 0.9500 . ? 
C25 H25 0.9500 . ? 
C26 H26A 0.9800 . ? 
C26 H26B 0.9800 . ? 
C26 H26C 0.9800 . ? 
C27 H27A 0.9800 . ? 
C27 H27B 0.9800 . ? 
C27 H27C 0.9800 . ? 
C28 H28A 0.9800 . ? 
C28 H28B 0.9800 . ? 
C28 H28C 0.9800 . ? 
C29 H29A 0.9800 . ? 
C29 H29B 0.9800 . ? 
C29 H29C 0.9800 . ? 
C30 H30A 0.9800 . ? 
C30 H30B 0.9800 . ? 
C30 H30C 0.9800 . ? 
C31 H31A 0.9800 . ? 
C31 H31B 0.9800 . ? 
C31 H31C 0.9800 . ? 
C32 C33 1.40(3) . ? 
C32 H32A 0.9800 . ? 
C32 H32B 0.9800 . ? 
C32 H32C 0.9800 . ? 
C33 C34 1.395(16) . ? 
C33 C38 1.398(15) . ? 
C34 C35 1.418(16) . ? 
C34 H34 0.9500 . ? 
C35 C36 1.354(15) . ? 
C35 H35 0.9500 . ? 
C36 C37 1.357(15) . ? 
C36 H36 0.9500 . ? 
C37 C38 1.418(16) . ? 
C37 H37 0.9500 . ? 
C38 H38 0.9500 . ? 
C39 C40 1.40(2) . ? 
C39 H39A 0.9800 . ? 
C39 H39B 0.9800 . ? 
C39 H39C 0.9800 . ? 
C40 C41 1.398(15) . ? 
C40 C45 1.406(15) . ? 
C41 C42 1.412(15) . ? 
C41 H41 0.9500 . ? 
C42 C43 1.356(14) . ? 
C42 H42 0.9500 . ? 
C43 C44 1.357(14) . ? 
C43 H43 0.9500 . ? 
C44 C45 1.416(16) . ? 
C44 H44 0.9500 . ? 
C45 H45 0.9500 . ? 
 
loop_ 
 _geom_angle_atom_site_label_1 
 _geom_angle_atom_site_label_2 
 _geom_angle_atom_site_label_3 
 _geom_angle 
 _geom_angle_site_symmetry_1 
 _geom_angle_site_symmetry_3 
 _geom_angle_publ_flag 
N1 La1 N2 118.3(2) . . ? 
N1 La1 C1 61.3(2) . . ? 
N2 La1 C1 60.6(2) . . ? 
N1 La1 I1 93.38(15) . . ? 
N2 La1 I1 96.73(15) . . ? 
C1 La1 I1 118.37(16) . . ? 
N1 La1 I2 90.95(16) . . ? 
N2 La1 I2 98.94(15) . . ? 
C1 La1 I2 81.26(16) . . ? 
I1 La1 I2 159.35(2) . . ? 
N1 La1 I2 123.99(15) . 7_656 ? 
N2 La1 I2 117.60(16) . 7_656 ? 
C1 La1 I2 158.90(16) . 7_656 ? 
I1 La1 I2 82.563(17) . 7_656 ? 
I2 La1 I2 78.301(16) . 7_656 ? 
La1 I2 La1 101.699(16) . 7_656 ? 
N1 P1 C1 106.4(4) . . ? 
N1 P1 C8 111.1(4) . . ? 
C1 P1 C8 112.4(4) . . ? 
N1 P1 C2 111.4(4) . . ? 
C1 P1 C2 108.5(4) . . ? 
C8 P1 C2 107.1(5) . . ? 
N2 P2 C1 106.2(4) . . ? 
N2 P2 C20 111.8(4) . . ? 
C1 P2 C20 112.7(4) . . ? 
N2 P2 C14 112.6(4) . . ? 
C1 P2 C14 109.6(4) . . ? 
C20 P2 C14 104.1(4) . . ? 
N1 Si1 C27 112.8(4) . . ? 
N1 Si1 C26 105.5(4) . . ? 
C27 Si1 C26 107.7(4) . . ? 
N1 Si1 C28 111.8(4) . . ? 
C27 Si1 C28 109.5(5) . . ? 
C26 Si1 C28 109.4(5) . . ? 
N2 Si2 C30 106.5(4) . . ? 
N2 Si2 C29 110.9(4) . . ? 
C30 Si2 C29 107.6(5) . . ? 
N2 Si2 C31 112.1(5) . . ? 
C30 Si2 C31 109.0(5) . . ? 
C29 Si2 C31 110.6(6) . . ? 
P1 N1 Si1 130.9(4) . . ? 
P1 N1 La1 103.3(3) . . ? 
Si1 N1 La1 125.1(3) . . ? 
P2 N2 Si2 132.4(4) . . ? 
P2 N2 La1 101.6(3) . . ? 
Si2 N2 La1 125.8(3) . . ? 
P2 C1 P1 138.3(5) . . ? 
P2 C1 La1 87.2(3) . . ? 
P1 C1 La1 87.6(3) . . ? 
P2 C1 H1 110.3 . . ? 
P1 C1 H1 110.3 . . ? 
La1 C1 H1 110.3 . . ? 
C3 C2 C7 119.1(10) . . ? 
C3 C2 P1 120.0(7) . . ? 
C7 C2 P1 120.6(9) . . ? 
C2 C3 C4 121.4(10) . . ? 
C2 C3 H3 119.3 . . ? 
C4 C3 H3 119.3 . . ? 
C5 C4 C3 118.7(14) . . ? 
C5 C4 H4 120.6 . . ? 
C3 C4 H4 120.6 . . ? 
C6 C5 C4 121.4(12) . . ? 
C6 C5 H5 119.3 . . ? 
C4 C5 H5 119.3 . . ? 
C5 C6 C7 119.6(10) . . ? 
C5 C6 H6 120.2 . . ? 
C7 C6 H6 120.2 . . ? 
C2 C7 C6 119.8(12) . . ? 
C2 C7 H7 120.1 . . ? 
C6 C7 H7 120.1 . . ? 
C13 C8 C9 120.8(9) . . ? 
C13 C8 P1 118.1(7) . . ? 
C9 C8 P1 121.1(9) . . ? 
C10 C9 C8 117.9(13) . . ? 
C10 C9 H9 121.0 . . ? 
C8 C9 H9 121.0 . . ? 
C11 C10 C9 121.4(11) . . ? 
C11 C10 H10 119.3 . . ? 
C9 C10 H10 119.3 . . ? 
C10 C11 C12 121.1(10) . . ? 
C10 C11 H11 119.5 . . ? 
C12 C11 H11 119.5 . . ? 
C13 C12 C11 117.7(13) . . ? 
C13 C12 H12 121.2 . . ? 
C11 C12 H12 121.2 . . ? 
C8 C13 C12 121.1(10) . . ? 
C8 C13 H13 119.4 . . ? 
C12 C13 H13 119.4 . . ? 
C19 C14 C15 118.4(7) . . ? 
C19 C14 P2 120.8(6) . . ? 
C15 C14 P2 120.8(6) . . ? 
C16 C15 C14 120.0(8) . . ? 
C16 C15 H15 120.0 . . ? 
C14 C15 H15 120.0 . . ? 
C17 C16 C15 120.4(9) . . ? 
C17 C16 H16 119.8 . . ? 
C15 C16 H16 119.8 . . ? 
C18 C17 C16 119.7(9) . . ? 
C18 C17 H17 120.2 . . ? 
C16 C17 H17 120.2 . . ? 
C19 C18 C17 120.6(9) . . ? 
C19 C18 H18 119.7 . . ? 
C17 C18 H18 119.7 . . ? 
C18 C19 C14 121.0(8) . . ? 
C18 C19 H19 119.5 . . ? 
C14 C19 H19 119.5 . . ? 
C21 C20 C25 119.7(8) . . ? 
C21 C20 P2 120.2(7) . . ? 
C25 C20 P2 120.0(7) . . ? 
C20 C21 C22 120.1(9) . . ? 
C20 C21 H21 119.9 . . ? 
C22 C21 H21 119.9 . . ? 
C23 C22 C21 119.8(10) . . ? 
C23 C22 H22 120.1 . . ? 
C21 C22 H22 120.1 . . ? 
C24 C23 C22 120.4(8) . . ? 
C24 C23 H23 119.8 . . ? 
C22 C23 H23 119.8 . . ? 
C23 C24 C25 120.0(10) . . ? 
C23 C24 H24 120.0 . . ? 
C25 C24 H24 120.0 . . ? 
C20 C25 C24 119.9(9) . . ? 
C20 C25 H25 120.0 . . ? 
C24 C25 H25 120.0 . . ? 
Si1 C26 H26A 109.5 . . ? 
Si1 C26 H26B 109.5 . . ? 
H26A C26 H26B 109.5 . . ? 
Si1 C26 H26C 109.5 . . ? 
H26A C26 H26C 109.5 . . ? 
H26B C26 H26C 109.5 . . ? 
Si1 C27 H27A 109.5 . . ? 
Si1 C27 H27B 109.5 . . ? 
H27A C27 H27B 109.5 . . ? 
Si1 C27 H27C 109.5 . . ? 
H27A C27 H27C 109.5 . . ? 
H27B C27 H27C 109.5 . . ? 
Si1 C28 H28A 109.5 . . ? 
Si1 C28 H28B 109.5 . . ? 
H28A C28 H28B 109.5 . . ? 
Si1 C28 H28C 109.5 . . ? 
H28A C28 H28C 109.5 . . ? 
H28B C28 H28C 109.5 . . ? 
Si2 C29 H29A 109.5 . . ? 
Si2 C29 H29B 109.5 . . ? 
H29A C29 H29B 109.5 . . ? 
Si2 C29 H29C 109.5 . . ? 
H29A C29 H29C 109.5 . . ? 
H29B C29 H29C 109.5 . . ? 
Si2 C30 H30A 109.5 . . ? 
Si2 C30 H30B 109.5 . . ? 
H30A C30 H30B 109.5 . . ? 
Si2 C30 H30C 109.5 . . ? 
H30A C30 H30C 109.5 . . ? 
H30B C30 H30C 109.5 . . ? 
Si2 C31 H31A 109.5 . . ? 
Si2 C31 H31B 109.5 . . ? 
H31A C31 H31B 109.5 . . ? 
Si2 C31 H31C 109.5 . . ? 
H31A C31 H31C 109.5 . . ? 
H31B C31 H31C 109.5 . . ? 
C34 C33 C32 119(2) . . ? 
C34 C33 C38 119(2) . . ? 
C32 C33 C38 122(2) . . ? 
C33 C34 C35 119(2) . . ? 
C33 C34 H34 120.3 . . ? 
C35 C34 H34 120.3 . . ? 
C36 C35 C34 121(2) . . ? 
C36 C35 H35 119.3 . . ? 
C34 C35 H35 119.3 . . ? 
C35 C36 C37 119(3) . . ? 
C35 C36 H36 120.4 . . ? 
C37 C36 H36 120.4 . . ? 
C36 C37 C38 122(3) . . ? 
C36 C37 H37 119.0 . . ? 
C38 C37 H37 119.0 . . ? 
C33 C38 C37 119(3) . . ? 
C33 C38 H38 120.6 . . ? 
C37 C38 H38 120.6 . . ? 
C40 C39 H39A 109.5 . . ? 
C40 C39 H39B 109.5 . . ? 
H39A C39 H39B 109.5 . . ? 
C40 C39 H39C 109.5 . . ? 
H39A C39 H39C 109.5 . . ? 
H39B C39 H39C 109.5 . . ? 
C41 C40 C39 123.3(16) . . ? 
C41 C40 C45 114.9(16) . . ? 
C39 C40 C45 121.8(16) . . ? 
C40 C41 C42 125.4(16) . . ? 
C40 C41 H41 117.3 . . ? 
C42 C41 H41 117.3 . . ? 
C43 C42 C41 115.0(16) . . ? 
C43 C42 H42 122.5 . . ? 
C41 C42 H42 122.5 . . ? 
C42 C43 C44 124.5(18) . . ? 
C42 C43 H43 117.7 . . ? 
C44 C43 H43 117.7 . . ? 
C43 C44 C45 118.8(17) . . ? 
C43 C44 H44 120.6 . . ? 
C45 C44 H44 120.6 . . ? 
C40 C45 C44 121.1(17) . . ? 
C40 C45 H45 119.5 . . ? 
C44 C45 H45 119.5 . . ? 
 
loop_ 
 _geom_torsion_atom_site_label_1 
 _geom_torsion_atom_site_label_2 
 _geom_torsion_atom_site_label_3 
 _geom_torsion_atom_site_label_4 
 _geom_torsion 
 _geom_torsion_site_symmetry_1 
 _geom_torsion_site_symmetry_2 
 _geom_torsion_site_symmetry_3 
 _geom_torsion_site_symmetry_4 
 _geom_torsion_publ_flag 
N1 La1 I2 La1 124.59(15) . . . 7_656 ? 
N2 La1 I2 La1 -116.51(16) . . . 7_656 ? 
C1 La1 I2 La1 -174.70(17) . . . 7_656 ? 
I1 La1 I2 La1 22.41(6) . . . 7_656 ? 
I2 La1 I2 La1 0.0 7_656 . . 7_656 ? 
C1 P1 N1 Si1 158.5(5) . . . . ? 
C8 P1 N1 Si1 -78.9(7) . . . . ? 
C2 P1 N1 Si1 40.5(7) . . . . ? 
C1 P1 N1 La1 -12.0(4) . . . . ? 
C8 P1 N1 La1 110.6(4) . . . . ? 
C2 P1 N1 La1 -130.1(4) . . . . ? 
C27 Si1 N1 P1 -61.3(7) . . . . ? 
C26 Si1 N1 P1 -178.6(6) . . . . ? 
C28 Si1 N1 P1 62.6(7) . . . . ? 
C27 Si1 N1 La1 107.4(5) . . . . ? 
C26 Si1 N1 La1 -9.9(5) . . . . ? 
C28 Si1 N1 La1 -128.7(5) . . . . ? 
N2 La1 N1 P1 -13.1(4) . . . . ? 
C1 La1 N1 P1 8.1(3) . . . . ? 
I1 La1 N1 P1 -112.6(3) . . . . ? 
I2 La1 N1 P1 87.6(3) . . . . ? 
I2 La1 N1 P1 164.1(2) 7_656 . . . ? 
N2 La1 N1 Si1 175.7(3) . . . . ? 
C1 La1 N1 Si1 -163.1(5) . . . . ? 
I1 La1 N1 Si1 76.2(4) . . . . ? 
I2 La1 N1 Si1 -83.6(4) . . . . ? 
I2 La1 N1 Si1 -7.1(5) 7_656 . . . ? 
C1 P2 N2 Si2 -154.1(5) . . . . ? 
C20 P2 N2 Si2 82.6(6) . . . . ? 
C14 P2 N2 Si2 -34.2(7) . . . . ? 
C1 P2 N2 La1 20.5(4) . . . . ? 
C20 P2 N2 La1 -102.9(4) . . . . ? 
C14 P2 N2 La1 140.4(3) . . . . ? 
C30 Si2 N2 P2 -177.1(6) . . . . ? 
C29 Si2 N2 P2 66.2(7) . . . . ? 
C31 Si2 N2 P2 -57.9(7) . . . . ? 
C30 Si2 N2 La1 9.5(6) . . . . ? 
C29 Si2 N2 La1 -107.3(5) . . . . ? 
C31 Si2 N2 La1 128.6(5) . . . . ? 
N1 La1 N2 P2 7.6(4) . . . . ? 
C1 La1 N2 P2 -13.8(3) . . . . ? 
I1 La1 N2 P2 105.1(3) . . . . ? 
I2 La1 N2 P2 -88.4(3) . . . . ? 
I2 La1 N2 P2 -169.8(2) 7_656 . . . ? 
N1 La1 N2 Si2 -177.4(4) . . . . ? 
C1 La1 N2 Si2 161.3(5) . . . . ? 
I1 La1 N2 Si2 -79.8(4) . . . . ? 
I2 La1 N2 Si2 86.7(4) . . . . ? 
I2 La1 N2 Si2 5.3(5) 7_656 . . . ? 
N2 P2 C1 P1 -100.9(7) . . . . ? 
C20 P2 C1 P1 21.9(8) . . . . ? 
C14 P2 C1 P1 137.3(7) . . . . ? 
N2 P2 C1 La1 -17.7(3) . . . . ? 
C20 P2 C1 La1 105.0(3) . . . . ? 
C14 P2 C1 La1 -139.5(3) . . . . ? 
N1 P1 C1 P2 93.3(7) . . . . ? 
C8 P1 C1 P2 -28.5(9) . . . . ? 
C2 P1 C1 P2 -146.8(7) . . . . ? 
N1 P1 C1 La1 10.2(3) . . . . ? 
C8 P1 C1 La1 -111.6(4) . . . . ? 
C2 P1 C1 La1 130.2(3) . . . . ? 
N1 La1 C1 P2 -146.0(4) . . . . ? 
N2 La1 C1 P2 12.6(2) . . . . ? 
I1 La1 C1 P2 -68.7(3) . . . . ? 
I2 La1 C1 P2 118.1(3) . . . . ? 
I2 La1 C1 P2 103.5(4) 7_656 . . . ? 
N1 La1 C1 P1 -7.4(3) . . . . ? 
N2 La1 C1 P1 151.2(4) . . . . ? 
I1 La1 C1 P1 69.9(3) . . . . ? 
I2 La1 C1 P1 -103.3(3) . . . . ? 
I2 La1 C1 P1 -117.9(4) 7_656 . . . ? 
N1 P1 C2 C3 88.0(9) . . . . ? 
C1 P1 C2 C3 -28.8(9) . . . . ? 
C8 P1 C2 C3 -150.3(8) . . . . ? 
N1 P1 C2 C7 -85.6(9) . . . . ? 
C1 P1 C2 C7 157.6(8) . . . . ? 
C8 P1 C2 C7 36.0(9) . . . . ? 
C7 C2 C3 C4 -1.0(17) . . . . ? 
P1 C2 C3 C4 -174.7(10) . . . . ? 
C2 C3 C4 C5 -1(2) . . . . ? 
C3 C4 C5 C6 2(2) . . . . ? 
C4 C5 C6 C7 -2(2) . . . . ? 
C3 C2 C7 C6 1.2(15) . . . . ? 
P1 C2 C7 C6 174.9(8) . . . . ? 
C5 C6 C7 C2 0.4(18) . . . . ? 
N1 P1 C8 C13 -25.1(9) . . . . ? 
C1 P1 C8 C13 94.0(8) . . . . ? 
C2 P1 C8 C13 -147.0(8) . . . . ? 
N1 P1 C8 C9 156.1(8) . . . . ? 
C1 P1 C8 C9 -84.8(10) . . . . ? 
C2 P1 C8 C9 34.2(10) . . . . ? 
C13 C8 C9 C10 -1.4(16) . . . . ? 
P1 C8 C9 C10 177.3(9) . . . . ? 
C8 C9 C10 C11 1.0(19) . . . . ? 
C9 C10 C11 C12 -1(2) . . . . ? 
C10 C11 C12 C13 0.7(17) . . . . ? 
C9 C8 C13 C12 1.5(16) . . . . ? 
P1 C8 C13 C12 -177.3(8) . . . . ? 
C11 C12 C13 C8 -1.1(15) . . . . ? 
N2 P2 C14 C19 81.7(8) . . . . ? 
C1 P2 C14 C19 -160.4(7) . . . . ? 
C20 P2 C14 C19 -39.6(8) . . . . ? 
N2 P2 C14 C15 -98.7(8) . . . . ? 
C1 P2 C14 C15 19.2(9) . . . . ? 
C20 P2 C14 C15 140.0(8) . . . . ? 
C19 C14 C15 C16 -1.2(16) . . . . ? 
P2 C14 C15 C16 179.2(9) . . . . ? 
C14 C15 C16 C17 1.0(19) . . . . ? 
C15 C16 C17 C18 -0.8(19) . . . . ? 
C16 C17 C18 C19 0.8(18) . . . . ? 
C17 C18 C19 C14 -1.1(16) . . . . ? 
C15 C14 C19 C18 1.3(14) . . . . ? 
P2 C14 C19 C18 -179.1(8) . . . . ? 
N2 P2 C20 C21 -170.5(7) . . . . ? 
C1 P2 C20 C21 69.9(8) . . . . ? 
C14 P2 C20 C21 -48.7(8) . . . . ? 
N2 P2 C20 C25 12.9(9) . . . . ? 
C1 P2 C20 C25 -106.7(8) . . . . ? 
C14 P2 C20 C25 134.6(8) . . . . ? 
C25 C20 C21 C22 -1.9(15) . . . . ? 
P2 C20 C21 C22 -178.5(8) . . . . ? 
C20 C21 C22 C23 0.9(16) . . . . ? 
C21 C22 C23 C24 -0.6(17) . . . . ? 
C22 C23 C24 C25 1.2(16) . . . . ? 
C21 C20 C25 C24 2.6(15) . . . . ? 
P2 C20 C25 C24 179.2(7) . . . . ? 
C23 C24 C25 C20 -2.3(15) . . . . ? 
C32 C33 C34 C35 178(3) . . . . ? 
C38 C33 C34 C35 -1(4) . . . . ? 
C33 C34 C35 C36 3(4) . . . . ? 
C34 C35 C36 C37 -4(5) . . . . ? 
C35 C36 C37 C38 5(5) . . . . ? 
C34 C33 C38 C37 1(5) . . . . ? 
C32 C33 C38 C37 -178(3) . . . . ? 
C36 C37 C38 C33 -3(5) . . . . ? 
C39 C40 C41 C42 -180(2) . . . . ? 
C45 C40 C41 C42 1(3) . . . . ? 
C40 C41 C42 C43 -1(3) . . . . ? 
C41 C42 C43 C44 -1(3) . . . . ? 
C42 C43 C44 C45 4(3) . . . . ? 
C41 C40 C45 C44 2(3) . . . . ? 
C39 C40 C45 C44 -177(2) . . . . ? 
C43 C44 C45 C40 -5(3) . . . . ? 
 
_diffrn_measured_fraction_theta_max    0.973 
_diffrn_reflns_theta_full              67.50 
_diffrn_measured_fraction_theta_full   0.997 

_refine_diff_density_max    2.27 
_refine_diff_density_min   -1.51
_refine_diff_density_rms    0.21

#=== END


data_3
 
_nottingham_internal_coll_name         GMSTLB
_nottingham_internal_coll_number       10907
_nottingham_internal_coll_client       GM/STL
_nottingham_internal_coll_type         quadrant
_nottingham_internal_coll_frame_time   '10.0'
_nottingham_internal_coll_frame_width  '0.3'
_nottingham_internal_coll_frame_method '\w'
_nottingham_internal_coll_user         DPM
_nottingham_internal_coll_date         24/11/2011
_nottingham_internal_process_user      DPM
_nottingham_internal_process_date      28/11/2011
_nottingham_internal_solution_user     DPM
_nottingham_internal_solution_date     28/11/2011
_nottingham_internal_refinement_user   DPM/AW
_nottingham_internal_refinement_date   30/09/2013
_nottingham_internal_validation_user   AJB
_nottingham_internal_validation_date   1/10/2013
_nottingham_internal_archive_date      ?

# start Validation Reply Form

_vrf_PLAT973_I
;
PROBLEM: Large Calcd. Positive Residual Density on Gd1 2.32 eA-3 
RESPONSE: Residual electron density os close to Gd and of no 
chemical significance
;
# end Validation Reply Form

_refine_special_details
;
Two of the three toluene solvent molecules exhibit disorder. Solvent molecule
C59...C65 was showed positional disorder and was split and modelled on two parts
with occupancies allowed to freely refine. Geometric distance restraints were 
employed on both parts to aid modelling. All atoms in disordered components were
refined isotropically.
Toluene C66...C72 exhbitied disorder, however could not be modelled similarly to
C59...C65 due to the positional disorder being spread over several positions.
This molecule was refined isotropically due to this disorder. Refining the 
molecule on part occupancy leads to a poorer refinement model.

Atom C50 has a large U(eq) value compared to neighbouring atoms, but is part of 
a coordinated THF molecule, and as no splitting is suggested this was left
as is.
;

_audit_creation_date              2013-09-30
_audit_creation_method
;
  Olex2 1.2
  (compiled Apr 23 2013 17:54:37, GUI svn.r4466)
;
_publ_contact_author_address      ?
_publ_contact_author_email        ?
_publ_contact_author_name         ''
_publ_contact_author_phone        ?
_chemical_name_common             ?
_chemical_name_systematic
;
 ?
;
_chemical_formula_moiety          'C51 H59 Gd I2 N2 O2 P2, 3(C7 H8)'
_chemical_formula_sum             'C72 H83 Gd I2 N2 O2 P2'
_chemical_formula_weight          1481.39
_chemical_melting_point           ?

loop_
  _atom_type_symbol
  _atom_type_description
  _atom_type_scat_dispersion_real
  _atom_type_scat_dispersion_imag
  _atom_type_scat_source
 'C' 'C' 0.0033 0.0016 'International Tables Vol C Tables 4.2.6.8 and 6.1.1.4'
 'H' 'H' 0.0000 0.0000 'International Tables Vol C Tables 4.2.6.8 and 6.1.1.4'
 'Gd' 'Gd' -0.1653 3.9035
 'International Tables Vol C Tables 4.2.6.8 and 6.1.1.4'
 'I' 'I' -0.4742 1.8119 'International Tables Vol C Tables 4.2.6.8 and 6.1.1.4'
 'N' 'N' 0.0061 0.0033 'International Tables Vol C Tables 4.2.6.8 and 6.1.1.4'
 'O' 'O' 0.0106 0.0060 'International Tables Vol C Tables 4.2.6.8 and 6.1.1.4'
 'P' 'P' 0.1023 0.0942 'International Tables Vol C Tables 4.2.6.8 and 6.1.1.4'

_space_group_crystal_system       'triclinic'
_space_group_IT_number            2
_space_group_name_H-M_alt         'P -1'
_space_group_name_Hall            '-P 1'
loop_
  _space_group_symop_operation_xyz
 'x, y, z'
 '-x, -y, -z'

_cell_length_a                    12.7851(6)
_cell_length_b                    15.1220(8)
_cell_length_c                    17.2635(9)
_cell_angle_alpha                 85.091(2)
_cell_angle_beta                  76.608(2)
_cell_angle_gamma                 87.266(2)
_cell_volume                      3233.7(3)
_cell_formula_units_Z             2
_cell_measurement_reflns_used     19750
_cell_measurement_temperature     90(2)
_cell_measurement_theta_max       27.39
_cell_measurement_theta_min       2.34
_exptl_absorpt_coefficient_mu     2.076
_exptl_absorpt_correction_T_max   0.4305
_exptl_absorpt_correction_T_min   0.3505
_exptl_absorpt_correction_type    multi-scan
_exptl_absorpt_process_details
;
SADABS-2007/2 (Bruker,2007) was used for absorption correction.
wR2(int) was 0.0615 before and 0.0445 after correction.
The Ratio of minimum to maximum transmission is 0.8142.
The \l/2 correction factor is 0.0015.
;
_exptl_crystal_colour             COLOURLESS
_exptl_crystal_density_diffrn     1.521
_exptl_crystal_density_meas       ?
_exptl_crystal_density_method     ?
_exptl_crystal_description        BLOCK
_exptl_crystal_F_000              1490
_exptl_crystal_size_max           0.15
_exptl_crystal_size_mid           0.09
_exptl_crystal_size_min           0.09
_exptl_special_details
;
 ?
;
_exptl_transmission_factor_max    ?
_exptl_transmission_factor_min    ?
_diffrn_reflns_av_R_equivalents   0.034
_diffrn_reflns_av_unetI/netI      0.036
_diffrn_reflns_Laue_measured_fraction_full 0.997
_diffrn_reflns_Laue_measured_fraction_max 0.987
_diffrn_reflns_limit_h_max        16
_diffrn_reflns_limit_h_min       -16
_diffrn_reflns_limit_k_max        18
_diffrn_reflns_limit_k_min       -19
_diffrn_reflns_limit_l_max        22
_diffrn_reflns_limit_l_min       -22
_diffrn_reflns_number             40617
_diffrn_reflns_point_group_measured_fraction_full 0.997
_diffrn_reflns_point_group_measured_fraction_max 0.987
_diffrn_reflns_theta_full         25.000
_diffrn_reflns_theta_max          27.428
_diffrn_reflns_theta_min          1.887
_diffrn_ambient_temperature       90(2)
_diffrn_detector_area_resol_mean  8.366
_diffrn_measured_fraction_theta_full 0.997
_diffrn_measured_fraction_theta_max 0.987
_diffrn_measurement_device_type   'Bruker SMART APEX CCD area detector'
_diffrn_measurement_method        \w
_diffrn_radiation_monochromator   graphite
_diffrn_radiation_type            MoK\a
_diffrn_radiation_wavelength      0.71073
_diffrn_source                    ?
_diffrn_standards_number          0
_reflns_Friedel_coverage          0.000
_reflns_Friedel_fraction_full     .
_reflns_Friedel_fraction_max      .
_reflns_number_gt                 12925
_reflns_number_total              14563
_reflns_special_details
;
 Reflections were merged by SHELXL according to the crystal
 class for the calculation of statistics and refinement.
 
 _reflns_Friedel_fraction is defined as the number of unique
 Friedel pairs measured divided by the number that would be
 possible theoretically, ignoring centric projections and
 systematic absences.
;
_reflns_threshold_expression      'I>2\s(I)'
_computing_data_collection        'Bruker SMART version 5.625 (Bruker, 2001)'
_computing_cell_refinement        'Bruker SAINT version 6.36A (Bruker, 2000)' 
_computing_data_reduction         'Bruker SAINT; SHELXTL (Sheldrick, 2008)' 
_computing_molecular_graphics
;
O. V. Dolomanov, L. J. Bourhis, R. J. Gildea, J. A. K. Howard and H. Puschmann,
OLEX2: a complete structure solution, refinement and analysis program.
J. Appl. Cryst. (2009). 42, 339-341.
;
_computing_publication_material
;
O. V. Dolomanov, L. J. Bourhis, R. J. Gildea, J. A. K. Howard and H. Puschmann,
OLEX2: a complete structure solution, refinement and analysis program.
J. Appl. Cryst. (2009). 42, 339-341.
;
_computing_structure_refinement
;
SHELXL, G.M. Sheldrick, Acta Cryst.
(2008). A64, 112-122
;
_computing_structure_solution     ?
_refine_diff_density_max          2.25
_refine_diff_density_min         -1.26
_refine_diff_density_rms          0.14
_refine_ls_extinction_coef        .
_refine_ls_extinction_method      none
_refine_ls_goodness_of_fit_ref    1.05
_refine_ls_hydrogen_treatment     constr
_refine_ls_matrix_type            full
_refine_ls_number_parameters      663
_refine_ls_number_reflns          14563
_refine_ls_number_restraints      45
_refine_ls_R_factor_all           0.0475
_refine_ls_R_factor_gt            0.0419
_refine_ls_restrained_S_all       1.14
_refine_ls_shift/su_max           0.003
_refine_ls_shift/su_mean          0.000
_refine_ls_structure_factor_coef  Fsqd
_refine_ls_weighting_details
'w=1/[\s^2^(Fo^2^)+(0.0646P)^2^+6.3799P] where P=(Fo^2^+2Fc^2^)/3'
_refine_ls_weighting_scheme       calc
_refine_ls_wR_factor_gt           0.109
_refine_ls_wR_factor_ref          0.114

_olex2_refinement_description
;
1. Fixed Uiso
 At 1.2 times of:
  All C(H) groups, All C(H,H) groups
 At 1.5 times of:
  All C(H,H,H) groups
2. Restrained distances
 C59-C60
 1.51 with sigma of 0.005
 C60-C65
 1.38 with sigma of 0.02
 C65-C64
 1.38 with sigma of 0.02
 C64-C63
 1.38 with sigma of 0.02
 C63-C62
 1.38 with sigma of 0.02
 C62-C61
 1.38 with sigma of 0.02
 C61-C60
 1.38 with sigma of 0.02
 C61-C59
 2.5 with sigma of 0.02
 C65-C59
 2.5 with sigma of 0.02
 C67-C68
 1.38 with sigma of 0.02
 C68-C69
 1.38 with sigma of 0.02
 C69-C70
 1.38 with sigma of 0.02
 C70-C71
 1.38 with sigma of 0.02
 C71-C72
 1.38 with sigma of 0.02
 C72-C67
 1.38 with sigma of 0.02
 C66-C67
 1.55 with sigma of 0.02
 C68-C66
 2.5 with sigma of 0.01
 C66-C72
 2.5 with sigma of 0.01
 C85-C86 = C86-C81 = C83-C81 = C84-C85
 1.38 with sigma of 0.02
 C82-C81
 1.55 with sigma of 0.02
 C80-C86
 2.5 with sigma of 0.02
 C80-C82
 2.5 with sigma of 0.02
 C80-C81
 1.55 with sigma of 0.02
 C83-C84
 1.38 with sigma of 0.02
 C82-C81
 1.38 with sigma of 0.02
 C82-C83
 1.38 with sigma of 0.02
3. Restrained planarity
 C59, C60, C65, C64, C63, C62, C61
 with sigma of 0.1
 C66, C67, C68, C69, C70, C71, C72
 with sigma of 0.1
 C66, C67, C68, C69, C70, C71, C72
 with sigma of 0.1
 C81, C86, C85, C84, C83, C82, C80
 with sigma of 0.1
4. Others
 Sof(C80)=Sof(H80A)=Sof(H80B)=Sof(H80C)=Sof(C81)=Sof(C86)=Sof(H86)=Sof(C85)=
 Sof(H85)=Sof(C84)=Sof(H84)=Sof(C83)=Sof(H83)=Sof(C82)=Sof(H82)=1-FVAR(1)
 Sof(C59)=Sof(H59A)=Sof(H59B)=Sof(H59C)=Sof(C60)=Sof(C65)=Sof(H65)=Sof(C64)=
 Sof(H64)=Sof(C63)=Sof(H63)=Sof(C62)=Sof(H62)=Sof(C61)=Sof(H61)=FVAR(1)
5.a Ternary CH refined with riding coordinates:
 C1(H1)
5.b Secondary CH2 refined with riding coordinates:
 C44(H44A,H44B), C45(H45A,H45B), C46(H46A,H46B), C47(H47A,H47B), C48(H48A,
 H48B), C49(H49A,H49B), C50(H50A,H50B), C51(H51A,H51B)
5.c Aromatic/amide H refined with riding coordinates:
 C3(H3), C4(H4), C5(H5), C6(H6), C7(H7), C9(H9), C10(H10), C11(H11), C12(H12),
 C13(H13), C15(H15), C16(H16), C17(H17), C18(H18), C19(H19), C21(H21), C22(H22),
  C23(H23), C24(H24), C25(H25), C28(H28), C30(H30), C37(H37), C39(H39),
 C54(H54), C55(H55), C56(H56), C57(H57), C58(H58), C65(H65), C64(H64), C63(H63),
  C62(H62), C61(H61), C68(H68), C69(H69), C70(H70), C71(H71), C72(H72),
 C86(H86), C85(H85), C84(H84), C83(H83), C82(H82)
5.d Fitted hexagon refined as free rotating group:
 C60(C65,C64,C63,C62,C61), C67(C68,C69,C70,C71,C72), C81(C86,C85,C84,C83,C82)
5.e Idealised Me refined as rotating group:
 C32(H32A,H32B,H32C), C33(H33A,H33B,H33C), C34(H34A,H34B,H34C), C41(H41A,H41B,
 H41C), C42(H42A,H42B,H42C), C43(H43A,H43B,H43C), C52(H52A,H52B,H52C), C59(H59A,
 H59B,H59C), C66(H66A,H66B,H66C), C80(H80A,H80B,H80C)
;
_atom_sites_solution_hydrogens   'geom, Me from difmap'
_atom_sites_solution_primary      direct
_atom_sites_solution_secondary    difmap

loop_
  _atom_site_label
  _atom_site_type_symbol
  _atom_site_fract_x
  _atom_site_fract_y
  _atom_site_fract_z
  _atom_site_U_iso_or_equiv
  _atom_site_adp_type
  _atom_site_occupancy
  _atom_site_site_symmetry_order
  _atom_site_calc_flag
  _atom_site_refinement_flags_posn
  _atom_site_refinement_flags_adp
  _atom_site_refinement_flags_occupancy
  _atom_site_disorder_assembly
  _atom_site_disorder_group
 Gd1 Gd 0.66754(2) 0.24568(2) 0.78065(2) 0.01998(6) Uani 1 1 d . . . . .
 I1 I 0.76135(2) 0.06998(2) 0.84576(2) 0.03181(8) Uani 1 1 d . . . . .
 I2 I 0.48752(2) 0.38312(2) 0.75728(2) 0.02448(7) Uani 1 1 d . . . . .
 P1 P 0.81315(7) 0.31898(6) 0.60970(5) 0.01912(18) Uani 1 1 d . . . . .
 P2 P 0.85821(7) 0.37804(6) 0.77078(5) 0.01931(18) Uani 1 1 d . . . . .
 O1 O 0.5394(2) 0.13764(18) 0.75450(17) 0.0274(6) Uani 1 1 d . . . . .
 O2 O 0.5360(2) 0.21794(19) 0.90813(17) 0.0317(6) Uani 1 1 d . . . . .
 N1 N 0.7558(2) 0.2248(2) 0.64162(18) 0.0207(6) Uani 1 1 d . . . . .
 N2 N 0.7723(2) 0.3344(2) 0.84742(17) 0.0205(6) Uani 1 1 d . . . . .
 C1 C 0.7934(3) 0.3769(2) 0.6937(2) 0.0202(7) Uani 1 1 d . . . . .
 H1 H 0.7505 0.4332 0.6880 0.024 Uiso 1 1 calc R U . . .
 C2 C 0.9530(3) 0.3142(3) 0.5549(2) 0.0214(7) Uani 1 1 d . . . . .
 C3 C 1.0130(3) 0.3895(3) 0.5524(2) 0.0252(8) Uani 1 1 d . . . . .
 H3 H 0.9824 0.4379 0.5825 0.030 Uiso 1 1 calc R U . . .
 C4 C 1.1175(3) 0.3938(3) 0.5060(2) 0.0285(8) Uani 1 1 d . . . . .
 H4 H 1.1583 0.4450 0.5053 0.034 Uiso 1 1 calc R U . . .
 C5 C 1.1629(3) 0.3245(3) 0.4609(2) 0.0287(8) Uani 1 1 d . . . . .
 H5 H 1.2345 0.3276 0.4298 0.034 Uiso 1 1 calc R U . . .
 C6 C 1.1029(3) 0.2506(3) 0.4616(2) 0.0292(8) Uani 1 1 d . . . . .
 H6 H 1.1334 0.2032 0.4300 0.035 Uiso 1 1 calc R U . . .
 C7 C 0.9982(3) 0.2448(3) 0.5079(2) 0.0259(8) Uani 1 1 d . . . . .
 H7 H 0.9575 0.1939 0.5076 0.031 Uiso 1 1 calc R U . . .
 C8 C 0.7544(3) 0.3836(3) 0.5354(2) 0.0227(7) Uani 1 1 d . . . . .
 C9 C 0.7893(3) 0.3660(3) 0.4549(2) 0.0301(8) Uani 1 1 d . . . . .
 H9 H 0.8439 0.3218 0.4399 0.036 Uiso 1 1 calc R U . . .
 C10 C 0.7450(4) 0.4125(3) 0.3968(3) 0.0357(10) Uani 1 1 d . . . . .
 H10 H 0.7686 0.3990 0.3426 0.043 Uiso 1 1 calc R U . . .
 C11 C 0.6666(3) 0.4784(3) 0.4170(3) 0.0328(9) Uani 1 1 d . . . . .
 H11 H 0.6361 0.5099 0.3772 0.039 Uiso 1 1 calc R U . . .
 C12 C 0.6332(3) 0.4978(3) 0.4964(2) 0.0278(8) Uani 1 1 d . . . . .
 H12 H 0.5812 0.5442 0.5104 0.033 Uiso 1 1 calc R U . . .
 C13 C 0.6749(3) 0.4504(3) 0.5552(2) 0.0253(8) Uani 1 1 d . . . . .
 H13 H 0.6495 0.4632 0.6093 0.030 Uiso 1 1 calc R U . . .
 C14 C 0.9888(3) 0.3204(3) 0.7444(2) 0.0220(7) Uani 1 1 d . . . . .
 C15 C 1.0845(3) 0.3666(3) 0.7197(2) 0.0277(8) Uani 1 1 d . . . . .
 H15 H 1.0833 0.4292 0.7222 0.033 Uiso 1 1 calc R U . . .
 C16 C 1.1813(3) 0.3215(3) 0.6915(3) 0.0336(9) Uani 1 1 d . . . . .
 H16 H 1.2461 0.3532 0.6755 0.040 Uiso 1 1 calc R U . . .
 C17 C 1.1837(3) 0.2309(3) 0.6867(3) 0.0323(9) Uani 1 1 d . . . . .
 H17 H 1.2498 0.2009 0.6658 0.039 Uiso 1 1 calc R U . . .
 C18 C 1.0895(3) 0.1831(3) 0.7123(3) 0.0301(8) Uani 1 1 d . . . . .
 H18 H 1.0915 0.1205 0.7099 0.036 Uiso 1 1 calc R U . . .
 C19 C 0.9923(3) 0.2284(3) 0.7417(2) 0.0249(8) Uani 1 1 d . . . . .
 H19 H 0.9281 0.1962 0.7601 0.030 Uiso 1 1 calc R U . . .
 C20 C 0.8981(3) 0.4884(2) 0.7839(2) 0.0225(7) Uani 1 1 d . . . . .
 C21 C 0.8991(3) 0.5570(3) 0.7247(2) 0.0255(8) Uani 1 1 d . . . . .
 H21 H 0.8690 0.5488 0.6805 0.031 Uiso 1 1 calc R U . . .
 C22 C 0.9440(3) 0.6376(3) 0.7301(3) 0.0318(9) Uani 1 1 d . . . . .
 H22 H 0.9455 0.6840 0.6892 0.038 Uiso 1 1 calc R U . . .
 C23 C 0.9867(4) 0.6503(3) 0.7950(3) 0.0361(10) Uani 1 1 d . . . . .
 H23 H 1.0178 0.7052 0.7984 0.043 Uiso 1 1 calc R U . . .
 C24 C 0.9838(4) 0.5825(3) 0.8552(3) 0.0350(9) Uani 1 1 d . . . . .
 H24 H 1.0114 0.5918 0.9003 0.042 Uiso 1 1 calc R U . . .
 C25 C 0.9409(3) 0.5016(3) 0.8498(2) 0.0282(8) Uani 1 1 d . . . . .
 H25 H 0.9405 0.4552 0.8905 0.034 Uiso 1 1 calc R U . . .
 C26 C 0.7453(3) 0.1571(3) 0.5906(2) 0.0231(7) Uani 1 1 d . . . . .
 C27 C 0.6581(3) 0.1599(3) 0.5531(2) 0.0244(7) Uani 1 1 d . . . . .
 C28 C 0.6472(3) 0.0899(3) 0.5073(2) 0.0282(8) Uani 1 1 d . . . . .
 H28 H 0.5882 0.0920 0.4822 0.034 Uiso 1 1 calc R U . . .
 C29 C 0.7193(3) 0.0178(3) 0.4971(2) 0.0308(9) Uani 1 1 d . . . . .
 C30 C 0.8032(3) 0.0160(3) 0.5355(2) 0.0281(8) Uani 1 1 d . . . . .
 H30 H 0.8533 -0.0327 0.5293 0.034 Uiso 1 1 calc R U . . .
 C31 C 0.8177(3) 0.0831(3) 0.5831(2) 0.0240(7) Uani 1 1 d . . . . .
 C32 C 0.5730(3) 0.2337(3) 0.5619(2) 0.0274(8) Uani 1 1 d . . . . .
 H32A H 0.5708 0.2625 0.6110 0.041 Uiso 1 1 calc R U . . .
 H32B H 0.5027 0.2088 0.5646 0.041 Uiso 1 1 calc R U . . .
 H32C H 0.5903 0.2774 0.5159 0.041 Uiso 1 1 calc R U . . .
 C33 C 0.7089(4) -0.0542(3) 0.4451(3) 0.0404(11) Uani 1 1 d . . . . .
 H33A H 0.6345 -0.0740 0.4584 0.061 Uiso 1 1 calc R U . . .
 H33B H 0.7573 -0.1044 0.4539 0.061 Uiso 1 1 calc R U . . .
 H33C H 0.7280 -0.0314 0.3889 0.061 Uiso 1 1 calc R U . . .
 C34 C 0.9071(3) 0.0711(3) 0.6265(2) 0.0276(8) Uani 1 1 d . . . . .
 H34A H 0.9295 0.1293 0.6365 0.041 Uiso 1 1 calc R U . . .
 H34B H 0.9683 0.0397 0.5938 0.041 Uiso 1 1 calc R U . . .
 H34C H 0.8819 0.0363 0.6775 0.041 Uiso 1 1 calc R U . . .
 C35 C 0.7650(3) 0.3561(3) 0.9280(2) 0.0219(7) Uani 1 1 d . . . . .
 C36 C 0.8212(3) 0.3057(3) 0.9784(2) 0.0244(7) Uani 1 1 d . . . . .
 C37 C 0.8080(3) 0.3276(3) 1.0568(2) 0.0267(8) Uani 1 1 d . . . . .
 H37 H 0.8472 0.2942 1.0903 0.032 Uiso 1 1 calc R U . . .
 C38 C 0.7394(3) 0.3965(3) 1.0881(2) 0.0312(9) Uani 1 1 d . . . . .
 C39 C 0.6860(3) 0.4454(3) 1.0375(2) 0.0309(9) Uani 1 1 d . . . . .
 H39 H 0.6389 0.4927 1.0579 0.037 Uiso 1 1 calc R U . . .
 C40 C 0.6981(3) 0.4286(3) 0.9576(2) 0.0244(7) Uani 1 1 d . . . . .
 C41 C 0.8973(3) 0.2306(3) 0.9495(3) 0.0314(9) Uani 1 1 d . . . . .
 H41A H 0.8579 0.1847 0.9325 0.047 Uiso 1 1 calc R U . . .
 H41B H 0.9300 0.2054 0.9928 0.047 Uiso 1 1 calc R U . . .
 H41C H 0.9538 0.2528 0.9043 0.047 Uiso 1 1 calc R U . . .
 C42 C 0.7251(4) 0.4153(4) 1.1747(3) 0.0441(12) Uani 1 1 d . . . . .
 H42A H 0.7566 0.3659 1.2031 0.066 Uiso 1 1 calc R U . . .
 H42B H 0.6483 0.4219 1.1993 0.066 Uiso 1 1 calc R U . . .
 H42C H 0.7612 0.4702 1.1777 0.066 Uiso 1 1 calc R U . . .
 C43 C 0.6433(3) 0.4904(3) 0.9048(2) 0.0278(8) Uani 1 1 d . . . . .
 H43A H 0.6965 0.5292 0.8698 0.042 Uiso 1 1 calc R U . . .
 H43B H 0.5878 0.5265 0.9380 0.042 Uiso 1 1 calc R U . . .
 H43C H 0.6100 0.4554 0.8722 0.042 Uiso 1 1 calc R U . . .
 C44 C 0.5624(3) 0.0456(3) 0.7349(3) 0.0299(8) Uani 1 1 d . . . . .
 H44A H 0.5722 0.0074 0.7824 0.036 Uiso 1 1 calc R U . . .
 H44B H 0.6285 0.0410 0.6920 0.036 Uiso 1 1 calc R U . . .
 C45 C 0.4655(4) 0.0182(3) 0.7073(3) 0.0421(11) Uani 1 1 d . . . . .
 H45A H 0.4576 -0.0470 0.7140 0.051 Uiso 1 1 calc R U . . .
 H45B H 0.4690 0.0394 0.6509 0.051 Uiso 1 1 calc R U . . .
 C46 C 0.3751(3) 0.0658(3) 0.7644(3) 0.0414(11) Uani 1 1 d . . . . .
 H46A H 0.3085 0.0715 0.7442 0.050 Uiso 1 1 calc R U . . .
 H46B H 0.3595 0.0347 0.8185 0.050 Uiso 1 1 calc R U . . .
 C47 C 0.4232(3) 0.1556(3) 0.7643(3) 0.0340(9) Uani 1 1 d . . . . .
 H47A H 0.4087 0.1963 0.7197 0.041 Uiso 1 1 calc R U . . .
 H47B H 0.3927 0.1828 0.8152 0.041 Uiso 1 1 calc R U . . .
 C48 C 0.4873(4) 0.1356(3) 0.9475(3) 0.0425(11) Uani 1 1 d . . . . .
 H48A H 0.5267 0.0833 0.9230 0.051 Uiso 1 1 calc R U . . .
 H48B H 0.4111 0.1340 0.9442 0.051 Uiso 1 1 calc R U . . .
 C49 C 0.4963(5) 0.1377(4) 1.0328(3) 0.0525(14) Uani 1 1 d . . . . .
 H49A H 0.5643 0.1085 1.0408 0.063 Uiso 1 1 calc R U . . .
 H49B H 0.4351 0.1078 1.0700 0.063 Uiso 1 1 calc R U . . .
 C50 C 0.4941(6) 0.2370(4) 1.0452(3) 0.0656(18) Uani 1 1 d . . . . .
 H50A H 0.4287 0.2537 1.0852 0.079 Uiso 1 1 calc R U . . .
 H50B H 0.5582 0.2524 1.0637 0.079 Uiso 1 1 calc R U . . .
 C51 C 0.4938(4) 0.2836(3) 0.9646(3) 0.0352(10) Uani 1 1 d . . . . .
 H51A H 0.4200 0.3033 0.9612 0.042 Uiso 1 1 calc R U . . .
 H51B H 0.5401 0.3360 0.9543 0.042 Uiso 1 1 calc R U . . .
 C52 C 0.7444(4) 0.8425(3) 0.7397(3) 0.0399(10) Uani 1 1 d . . . . .
 H52A H 0.7054 0.8669 0.7895 0.060 Uiso 1 1 calc R U . . .
 H52B H 0.7670 0.8912 0.6989 0.060 Uiso 1 1 calc R U . . .
 H52C H 0.8078 0.8081 0.7490 0.060 Uiso 1 1 calc R U . . .
 C53 C 0.6719(3) 0.7831(3) 0.7116(2) 0.0282(8) Uani 1 1 d . . . . .
 C54 C 0.6527(4) 0.6974(3) 0.7471(3) 0.0330(9) Uani 1 1 d . . . . .
 H54 H 0.6864 0.6764 0.7890 0.040 Uiso 1 1 calc R U . . .
 C55 C 0.5857(4) 0.6426(3) 0.7225(3) 0.0404(11) Uani 1 1 d . . . . .
 H55 H 0.5741 0.5842 0.7473 0.049 Uiso 1 1 calc R U . . .
 C56 C 0.5358(4) 0.6717(4) 0.6627(3) 0.0464(13) Uani 1 1 d . . . . .
 H56 H 0.4887 0.6341 0.6465 0.056 Uiso 1 1 calc R U . . .
 C57 C 0.5544(4) 0.7567(4) 0.6258(3) 0.0451(12) Uani 1 1 d . . . . .
 H57 H 0.5208 0.7769 0.5836 0.054 Uiso 1 1 calc R U . . .
 C58 C 0.6220(3) 0.8124(3) 0.6504(3) 0.0340(9) Uani 1 1 d . . . . .
 H58 H 0.6340 0.8705 0.6252 0.041 Uiso 1 1 calc R U . . .
 C59 C 0.8094(8) 0.6284(4) 0.0663(6) 0.050(3) Uiso 0.522(9) 1 d D . P A 1
 H59A H 0.8682 0.6069 0.0914 0.074 Uiso 0.522(9) 1 calc R U P A 1
 H59B H 0.8143 0.5981 0.0176 0.074 Uiso 0.522(9) 1 calc R U P A 1
 H59C H 0.7403 0.6160 0.1035 0.074 Uiso 0.522(9) 1 calc R U P A 1
 C60 C 0.8180(5) 0.7272(3) 0.0455(3) 0.035(2) Uiso 0.522(9) 1 d DG . P A 1
 C65 C 0.8278(6) 0.7824(4) 0.1036(3) 0.042(3) Uiso 0.522(9) 1 d DG . P A 1
 H65 H 0.8286 0.7580 0.1560 0.051 Uiso 0.522(9) 1 calc R U P A 1
 C64 C 0.8365(6) 0.8734(3) 0.0850(3) 0.037(2) Uiso 0.522(9) 1 d DG . P A 1
 H64 H 0.8433 0.9112 0.1248 0.045 Uiso 0.522(9) 1 calc R U P A 1
 C63 C 0.8354(5) 0.9092(3) 0.0083(3) 0.043(2) Uiso 0.522(9) 1 d DG . P A 1
 H63 H 0.8413 0.9714 -0.0044 0.051 Uiso 0.522(9) 1 calc R U P A 1
 C62 C 0.8255(6) 0.8540(4) -0.0498(3) 0.047(3) Uiso 0.522(9) 1 d DG . P A 1
 H62 H 0.8247 0.8785 -0.1022 0.056 Uiso 0.522(9) 1 calc R U P A 1
 C61 C 0.8168(5) 0.7630(4) -0.0312(3) 0.038(2) Uiso 0.522(9) 1 d DG . P A 1
 H61 H 0.8101 0.7252 -0.0709 0.045 Uiso 0.522(9) 1 calc R U P A 1
 C66 C 0.6606(7) 0.1743(6) 0.1851(6) 0.122(4) Uiso 1 1 d D . . B 1
 H66A H 0.6785 0.2236 0.1441 0.182 Uiso 1 1 calc R U . B 1
 H66B H 0.5994 0.1921 0.2271 0.182 Uiso 1 1 calc R U . B 1
 H66C H 0.6418 0.1227 0.1610 0.182 Uiso 1 1 calc R U . B 1
 C67 C 0.7563(3) 0.1505(3) 0.2209(3) 0.0733(19) Uiso 1 1 d DG . . B 1
 C68 C 0.8475(4) 0.1059(4) 0.1804(2) 0.102(3) Uiso 1 1 d DG . . B 1
 H68 H 0.8510 0.0883 0.1284 0.122 Uiso 1 1 calc R U . B 1
 C69 C 0.9338(3) 0.0870(4) 0.2162(3) 0.079(2) Uiso 1 1 d DG . . B 1
 H69 H 0.9961 0.0566 0.1885 0.095 Uiso 1 1 calc R U . B 1
 C70 C 0.9288(3) 0.1128(3) 0.2923(3) 0.088(2) Uiso 1 1 d DG . . B 1
 H70 H 0.9877 0.0999 0.3168 0.106 Uiso 1 1 calc R U . B 1
 C71 C 0.8375(4) 0.1574(3) 0.3328(2) 0.077(2) Uiso 1 1 d DG . . B 1
 H71 H 0.8341 0.1750 0.3849 0.093 Uiso 1 1 calc R U . B 1
 C72 C 0.7513(3) 0.1763(3) 0.2971(3) 0.0637(16) Uiso 1 1 d DG . . B 1
 H72 H 0.6889 0.2068 0.3247 0.076 Uiso 1 1 calc R U . B 1
 C80 C 0.8569(15) 0.9370(9) 0.0511(10) 0.097(6) Uiso 0.478(9) 1 d D . P A 2
 H80A H 0.9296 0.9513 0.0208 0.145 Uiso 0.478(9) 1 calc R U P A 2
 H80B H 0.8534 0.9376 0.1083 0.145 Uiso 0.478(9) 1 calc R U P A 2
 H80C H 0.8052 0.9812 0.0357 0.145 Uiso 0.478(9) 1 calc R U P A 2
 C81 C 0.8298(8) 0.8463(5) 0.0332(5) 0.066(4) Uiso 0.478(9) 1 d DG . P A 2
 C86 C 0.8249(8) 0.8279(5) -0.0433(4) 0.053(3) Uiso 0.478(9) 1 d DG . P A 2
 H86 H 0.8330 0.8742 -0.0849 0.063 Uiso 0.478(9) 1 calc R U P A 2
 C85 C 0.8081(9) 0.7417(6) -0.0591(4) 0.071(4) Uiso 0.478(9) 1 d DG . P A 2
 H85 H 0.8047 0.7292 -0.1115 0.085 Uiso 0.478(9) 1 calc R U P A 2
 C84 C 0.7962(9) 0.6740(5) 0.0017(6) 0.075(4) Uiso 0.478(9) 1 d DG . P A 2
 H84 H 0.7847 0.6151 -0.0091 0.090 Uiso 0.478(9) 1 calc R U P A 2
 C83 C 0.8010(9) 0.6924(5) 0.0783(5) 0.063(4) Uiso 0.478(9) 1 d DG . P A 2
 H83 H 0.7929 0.6460 0.1198 0.076 Uiso 0.478(9) 1 calc R U P A 2
 C82 C 0.8179(9) 0.7785(6) 0.0941(4) 0.065(5) Uiso 0.478(9) 1 d DG . P A 2
 H82 H 0.8212 0.7911 0.1464 0.078 Uiso 0.478(9) 1 calc R U P A 2

loop_
  _atom_site_aniso_label
  _atom_site_aniso_U_11
  _atom_site_aniso_U_22
  _atom_site_aniso_U_33
  _atom_site_aniso_U_23
  _atom_site_aniso_U_13
  _atom_site_aniso_U_12
 Gd1 0.01436(9) 0.02477(10) 0.01901(9) -0.00467(7) 0.00123(6) -0.00189(6)
 I1 0.02849(14) 0.02969(15) 0.03662(15) -0.00214(11) -0.00607(11) -0.00201(10)
 I2 0.01617(11) 0.02801(13) 0.02715(13) -0.00427(9) -0.00003(9) 0.00007(9)
 P1 0.0137(4) 0.0249(5) 0.0178(4) -0.0048(3) -0.0003(3) -0.0011(3)
 P2 0.0152(4) 0.0237(5) 0.0182(4) -0.0043(3) -0.0011(3) -0.0013(3)
 O1 0.0162(12) 0.0291(14) 0.0361(15) -0.0091(12) -0.0013(11) -0.0027(10)
 O2 0.0286(14) 0.0322(16) 0.0279(14) -0.0061(12) 0.0082(12) -0.0032(12)
 N1 0.0174(14) 0.0251(16) 0.0186(14) -0.0049(12) -0.0003(11) -0.0029(11)
 N2 0.0179(14) 0.0266(16) 0.0163(14) -0.0044(11) -0.0011(11) -0.0018(11)
 C1 0.0137(15) 0.0253(18) 0.0217(17) -0.0052(14) -0.0029(13) 0.0001(13)
 C2 0.0160(16) 0.031(2) 0.0167(16) -0.0031(14) -0.0024(13) -0.0004(13)
 C3 0.0200(17) 0.031(2) 0.0231(18) -0.0037(15) -0.0008(14) -0.0002(14)
 C4 0.0199(18) 0.036(2) 0.0276(19) -0.0037(16) -0.0001(15) -0.0072(15)
 C5 0.0181(17) 0.037(2) 0.0268(19) -0.0018(16) 0.0025(15) 0.0001(15)
 C6 0.0260(19) 0.030(2) 0.0263(19) -0.0044(15) 0.0050(15) 0.0026(15)
 C7 0.0227(18) 0.029(2) 0.0240(18) -0.0052(15) 0.0010(15) -0.0023(14)
 C8 0.0156(16) 0.0301(19) 0.0216(17) -0.0021(14) -0.0016(13) -0.0046(14)
 C9 0.028(2) 0.039(2) 0.0236(19) -0.0058(16) -0.0052(16) -0.0001(16)
 C10 0.033(2) 0.052(3) 0.0228(19) -0.0019(18) -0.0079(17) -0.0031(19)
 C11 0.028(2) 0.041(2) 0.031(2) 0.0062(18) -0.0134(17) -0.0073(17)
 C12 0.0176(17) 0.033(2) 0.033(2) 0.0017(16) -0.0067(15) -0.0039(14)
 C13 0.0166(16) 0.030(2) 0.0289(19) -0.0019(15) -0.0033(14) -0.0028(14)
 C14 0.0171(16) 0.0289(19) 0.0189(16) -0.0046(14) -0.0016(13) 0.0015(14)
 C15 0.0193(17) 0.031(2) 0.031(2) -0.0010(16) -0.0038(15) -0.0009(15)
 C16 0.0169(18) 0.041(2) 0.041(2) -0.0032(19) -0.0012(16) -0.0026(16)
 C17 0.0203(18) 0.044(2) 0.033(2) -0.0125(18) -0.0057(16) 0.0043(16)
 C18 0.0233(19) 0.034(2) 0.034(2) -0.0114(17) -0.0069(16) 0.0031(16)
 C19 0.0183(17) 0.031(2) 0.0256(18) -0.0079(15) -0.0039(14) -0.0002(14)
 C20 0.0176(16) 0.0253(18) 0.0239(17) -0.0064(14) -0.0012(14) -0.0018(13)
 C21 0.0195(17) 0.030(2) 0.0261(18) -0.0052(15) -0.0030(14) 0.0007(14)
 C22 0.033(2) 0.027(2) 0.035(2) -0.0006(16) -0.0077(17) -0.0030(16)
 C23 0.037(2) 0.029(2) 0.042(2) -0.0053(18) -0.0072(19) -0.0095(17)
 C24 0.037(2) 0.040(2) 0.032(2) -0.0074(18) -0.0116(18) -0.0091(18)
 C25 0.0266(19) 0.031(2) 0.0275(19) -0.0048(16) -0.0055(16) -0.0047(15)
 C26 0.0190(17) 0.0281(19) 0.0203(17) -0.0050(14) 0.0015(13) -0.0054(14)
 C27 0.0194(17) 0.028(2) 0.0245(18) -0.0048(15) -0.0012(14) -0.0045(14)
 C28 0.0243(19) 0.035(2) 0.0260(19) -0.0078(16) -0.0029(15) -0.0072(15)
 C29 0.031(2) 0.035(2) 0.0267(19) -0.0093(16) -0.0023(16) -0.0062(16)
 C30 0.0249(19) 0.028(2) 0.0288(19) -0.0091(16) 0.0012(15) -0.0015(15)
 C31 0.0190(17) 0.0279(19) 0.0223(17) -0.0038(14) 0.0024(14) -0.0037(14)
 C32 0.0193(17) 0.035(2) 0.030(2) -0.0091(16) -0.0064(15) -0.0028(15)
 C33 0.043(3) 0.042(3) 0.038(2) -0.017(2) -0.007(2) -0.003(2)
 C34 0.0235(18) 0.029(2) 0.031(2) -0.0063(16) -0.0054(16) 0.0034(15)
 C35 0.0162(16) 0.0290(19) 0.0191(16) -0.0047(14) 0.0005(13) -0.0030(13)
 C36 0.0159(16) 0.030(2) 0.0250(18) -0.0042(15) 0.0006(14) -0.0014(14)
 C37 0.0196(17) 0.037(2) 0.0223(18) -0.0034(15) -0.0027(14) 0.0030(15)
 C38 0.0264(19) 0.044(2) 0.0228(19) -0.0093(17) -0.0033(15) 0.0069(17)
 C39 0.0251(19) 0.042(2) 0.0258(19) -0.0147(17) -0.0035(16) 0.0074(17)
 C40 0.0196(17) 0.031(2) 0.0219(17) -0.0065(15) -0.0032(14) 0.0023(14)
 C41 0.028(2) 0.036(2) 0.029(2) -0.0072(17) -0.0074(16) 0.0108(17)
 C42 0.041(3) 0.066(3) 0.026(2) -0.018(2) -0.0080(19) 0.020(2)
 C43 0.0225(18) 0.032(2) 0.0280(19) -0.0073(16) -0.0038(15) 0.0023(15)
 C44 0.0227(18) 0.027(2) 0.038(2) -0.0101(17) 0.0006(16) -0.0043(15)
 C45 0.028(2) 0.039(3) 0.060(3) -0.019(2) -0.003(2) -0.0051(18)
 C46 0.022(2) 0.032(2) 0.067(3) -0.010(2) -0.001(2) -0.0047(17)
 C47 0.0167(18) 0.038(2) 0.046(2) -0.0094(19) -0.0028(17) -0.0029(16)
 C48 0.044(3) 0.036(2) 0.036(2) -0.0024(19) 0.016(2) -0.010(2)
 C49 0.060(3) 0.053(3) 0.035(3) 0.005(2) 0.007(2) -0.004(3)
 C50 0.097(5) 0.062(4) 0.030(3) -0.009(2) 0.003(3) 0.000(3)
 C51 0.031(2) 0.036(2) 0.033(2) -0.0129(18) 0.0080(17) -0.0032(17)
 C52 0.038(2) 0.040(3) 0.043(3) -0.015(2) -0.007(2) -0.0024(19)
 C53 0.0249(19) 0.031(2) 0.0259(19) -0.0090(15) 0.0017(15) 0.0025(15)
 C54 0.033(2) 0.032(2) 0.028(2) -0.0021(16) 0.0031(17) 0.0036(17)
 C55 0.034(2) 0.034(2) 0.046(3) -0.009(2) 0.008(2) -0.0075(18)
 C56 0.025(2) 0.054(3) 0.060(3) -0.030(3) 0.001(2) -0.005(2)
 C57 0.033(2) 0.062(3) 0.042(3) -0.013(2) -0.011(2) 0.014(2)
 C58 0.032(2) 0.033(2) 0.033(2) -0.0040(17) -0.0005(17) 0.0071(17)

_geom_special_details
;
 All esds (except the esd in the dihedral angle between two l.s. planes)
 are estimated using the full covariance matrix.  The cell esds are taken
 into account individually in the estimation of esds in distances, angles
 and torsion angles; correlations between esds in cell parameters are only
 used when they are defined by crystal symmetry.  An approximate (isotropic)
 treatment of cell esds is used for estimating esds involving l.s. planes.
;
loop_
  _geom_bond_atom_site_label_1
  _geom_bond_atom_site_label_2
  _geom_bond_distance
  _geom_bond_site_symmetry_2
  _geom_bond_publ_flag
 Gd1 I1 3.0936(3) . ?
 Gd1 I2 3.1000(3) . ?
 Gd1 O1 2.506(3) . ?
 Gd1 O2 2.458(3) . ?
 Gd1 N1 2.445(3) . ?
 Gd1 N2 2.464(3) . ?
 Gd1 C1 2.731(4) . ?
 P1 N1 1.627(3) . ?
 P1 C1 1.721(4) . ?
 P1 C2 1.820(4) . ?
 P1 C8 1.823(4) . ?
 P2 N2 1.625(3) . ?
 P2 C1 1.725(4) . ?
 P2 C14 1.825(4) . ?
 P2 C20 1.815(4) . ?
 O1 C44 1.461(5) . ?
 O1 C47 1.471(5) . ?
 O2 C48 1.460(5) . ?
 O2 C51 1.448(5) . ?
 N1 C26 1.437(5) . ?
 N2 C35 1.437(4) . ?
 C1 H1 1.0000 . ?
 C2 C3 1.396(5) . ?
 C2 C7 1.401(5) . ?
 C3 H3 0.9500 . ?
 C3 C4 1.391(5) . ?
 C4 H4 0.9500 . ?
 C4 C5 1.383(6) . ?
 C5 H5 0.9500 . ?
 C5 C6 1.384(6) . ?
 C6 H6 0.9500 . ?
 C6 C7 1.394(5) . ?
 C7 H7 0.9500 . ?
 C8 C9 1.403(5) . ?
 C8 C13 1.404(5) . ?
 C9 H9 0.9500 . ?
 C9 C10 1.387(6) . ?
 C10 H10 0.9500 . ?
 C10 C11 1.387(6) . ?
 C11 H11 0.9500 . ?
 C11 C12 1.390(6) . ?
 C12 H12 0.9500 . ?
 C12 C13 1.385(6) . ?
 C13 H13 0.9500 . ?
 C14 C15 1.398(5) . ?
 C14 C19 1.394(5) . ?
 C15 H15 0.9500 . ?
 C15 C16 1.390(5) . ?
 C16 H16 0.9500 . ?
 C16 C17 1.377(6) . ?
 C17 H17 0.9500 . ?
 C17 C18 1.396(6) . ?
 C18 H18 0.9500 . ?
 C18 C19 1.399(5) . ?
 C19 H19 0.9500 . ?
 C20 C21 1.390(5) . ?
 C20 C25 1.405(5) . ?
 C21 H21 0.9500 . ?
 C21 C22 1.390(6) . ?
 C22 H22 0.9500 . ?
 C22 C23 1.386(6) . ?
 C23 H23 0.9500 . ?
 C23 C24 1.391(6) . ?
 C24 H24 0.9500 . ?
 C24 C25 1.382(6) . ?
 C25 H25 0.9500 . ?
 C26 C27 1.410(5) . ?
 C26 C31 1.413(5) . ?
 C27 C28 1.404(5) . ?
 C27 C32 1.513(5) . ?
 C28 H28 0.9500 . ?
 C28 C29 1.390(6) . ?
 C29 C30 1.384(6) . ?
 C29 C33 1.499(6) . ?
 C30 H30 0.9500 . ?
 C30 C31 1.403(5) . ?
 C31 C34 1.502(5) . ?
 C32 H32A 0.9800 . ?
 C32 H32B 0.9800 . ?
 C32 H32C 0.9800 . ?
 C33 H33A 0.9800 . ?
 C33 H33B 0.9800 . ?
 C33 H33C 0.9800 . ?
 C34 H34A 0.9800 . ?
 C34 H34B 0.9800 . ?
 C34 H34C 0.9800 . ?
 C35 C36 1.407(5) . ?
 C35 C40 1.415(5) . ?
 C36 C37 1.392(5) . ?
 C36 C41 1.501(5) . ?
 C37 H37 0.9500 . ?
 C37 C38 1.391(5) . ?
 C38 C39 1.375(6) . ?
 C38 C42 1.514(6) . ?
 C39 H39 0.9500 . ?
 C39 C40 1.396(5) . ?
 C40 C43 1.510(5) . ?
 C41 H41A 0.9800 . ?
 C41 H41B 0.9800 . ?
 C41 H41C 0.9800 . ?
 C42 H42A 0.9800 . ?
 C42 H42B 0.9800 . ?
 C42 H42C 0.9800 . ?
 C43 H43A 0.9800 . ?
 C43 H43B 0.9800 . ?
 C43 H43C 0.9800 . ?
 C44 H44A 0.9900 . ?
 C44 H44B 0.9900 . ?
 C44 C45 1.512(6) . ?
 C45 H45A 0.9900 . ?
 C45 H45B 0.9900 . ?
 C45 C46 1.530(6) . ?
 C46 H46A 0.9900 . ?
 C46 H46B 0.9900 . ?
 C46 C47 1.517(6) . ?
 C47 H47A 0.9900 . ?
 C47 H47B 0.9900 . ?
 C48 H48A 0.9900 . ?
 C48 H48B 0.9900 . ?
 C48 C49 1.506(7) . ?
 C49 H49A 0.9900 . ?
 C49 H49B 0.9900 . ?
 C49 C50 1.534(8) . ?
 C50 H50A 0.9900 . ?
 C50 H50B 0.9900 . ?
 C50 C51 1.506(7) . ?
 C51 H51A 0.9900 . ?
 C51 H51B 0.9900 . ?
 C52 H52A 0.9800 . ?
 C52 H52B 0.9800 . ?
 C52 H52C 0.9800 . ?
 C52 C53 1.504(6) . ?
 C53 C54 1.393(6) . ?
 C53 C58 1.388(6) . ?
 C54 H54 0.9500 . ?
 C54 C55 1.376(7) . ?
 C55 H55 0.9500 . ?
 C55 C56 1.365(8) . ?
 C56 H56 0.9500 . ?
 C56 C57 1.392(8) . ?
 C57 H57 0.9500 . ?
 C57 C58 1.391(7) . ?
 C58 H58 0.9500 . ?
 C59 H59A 0.9800 . ?
 C59 H59B 0.9800 . ?
 C59 H59C 0.9800 . ?
 C59 C60 1.510(4) . ?
 C60 C65 1.3900 . ?
 C60 C61 1.3900 . ?
 C65 H65 0.9500 . ?
 C65 C64 1.3900 . ?
 C64 H64 0.9500 . ?
 C64 C63 1.3900 . ?
 C63 H63 0.9500 . ?
 C63 C62 1.3900 . ?
 C62 H62 0.9500 . ?
 C62 C61 1.3900 . ?
 C61 H61 0.9500 . ?
 C66 H66A 0.9800 . ?
 C66 H66B 0.9800 . ?
 C66 H66C 0.9800 . ?
 C66 C67 1.509(6) . ?
 C67 C68 1.3900 . ?
 C67 C72 1.3900 . ?
 C68 H68 0.9500 . ?
 C68 C69 1.3900 . ?
 C69 H69 0.9500 . ?
 C69 C70 1.3900 . ?
 C70 H70 0.9500 . ?
 C70 C71 1.3900 . ?
 C71 H71 0.9500 . ?
 C71 C72 1.3900 . ?
 C72 H72 0.9500 . ?
 C80 H80A 0.9800 . ?
 C80 H80B 0.9800 . ?
 C80 H80C 0.9800 . ?
 C80 C81 1.505(11) . ?
 C81 C86 1.3900 . ?
 C81 C82 1.3900 . ?
 C86 H86 0.9500 . ?
 C86 C85 1.3900 . ?
 C85 H85 0.9500 . ?
 C85 C84 1.3900 . ?
 C84 H84 0.9500 . ?
 C84 C83 1.3900 . ?
 C83 H83 0.9500 . ?
 C83 C82 1.3900 . ?
 C82 H82 0.9500 . ?

loop_
  _geom_angle_atom_site_label_1
  _geom_angle_atom_site_label_2
  _geom_angle_atom_site_label_3
  _geom_angle
  _geom_angle_site_symmetry_1
  _geom_angle_site_symmetry_3
  _geom_angle_publ_flag
 I1 Gd1 I2 155.765(9) . . ?
 O1 Gd1 I1 79.77(7) . . ?
 O1 Gd1 I2 83.03(6) . . ?
 O1 Gd1 C1 136.28(10) . . ?
 O2 Gd1 I1 79.45(7) . . ?
 O2 Gd1 I2 79.56(7) . . ?
 O2 Gd1 O1 74.37(10) . . ?
 O2 Gd1 N2 89.70(10) . . ?
 O2 Gd1 C1 140.79(10) . . ?
 N1 Gd1 I1 93.97(7) . . ?
 N1 Gd1 I2 100.50(7) . . ?
 N1 Gd1 O1 82.23(9) . . ?
 N1 Gd1 O2 156.45(10) . . ?
 N1 Gd1 N2 113.23(10) . . ?
 N1 Gd1 C1 61.15(10) . . ?
 N2 Gd1 I1 91.65(7) . . ?
 N2 Gd1 I2 100.21(7) . . ?
 N2 Gd1 O1 162.98(10) . . ?
 N2 Gd1 C1 60.60(10) . . ?
 C1 Gd1 I1 122.89(7) . . ?
 C1 Gd1 I2 81.28(7) . . ?
 N1 P1 C1 104.29(17) . . ?
 N1 P1 C2 117.04(17) . . ?
 N1 P1 C8 114.00(16) . . ?
 C1 P1 C2 113.25(17) . . ?
 C1 P1 C8 108.74(18) . . ?
 C2 P1 C8 99.57(16) . . ?
 N2 P2 C1 103.51(16) . . ?
 N2 P2 C14 116.31(17) . . ?
 N2 P2 C20 113.81(16) . . ?
 C1 P2 C14 109.62(17) . . ?
 C1 P2 C20 112.70(18) . . ?
 C20 P2 C14 101.20(17) . . ?
 C44 O1 Gd1 127.5(2) . . ?
 C44 O1 C47 108.2(3) . . ?
 C47 O1 Gd1 124.1(2) . . ?
 C48 O2 Gd1 130.6(2) . . ?
 C51 O2 Gd1 125.4(2) . . ?
 C51 O2 C48 103.9(3) . . ?
 P1 N1 Gd1 103.62(14) . . ?
 C26 N1 Gd1 131.2(2) . . ?
 C26 N1 P1 124.0(2) . . ?
 P2 N2 Gd1 100.65(14) . . ?
 C35 N2 Gd1 135.7(2) . . ?
 C35 N2 P2 123.5(2) . . ?
 Gd1 C1 H1 111.4 . . ?
 P1 C1 Gd1 90.47(15) . . ?
 P1 C1 P2 134.3(2) . . ?
 P1 C1 H1 111.4 . . ?
 P2 C1 Gd1 88.54(14) . . ?
 P2 C1 H1 111.4 . . ?
 C3 C2 P1 116.8(3) . . ?
 C3 C2 C7 119.0(3) . . ?
 C7 C2 P1 123.6(3) . . ?
 C2 C3 H3 119.9 . . ?
 C4 C3 C2 120.2(4) . . ?
 C4 C3 H3 119.9 . . ?
 C3 C4 H4 119.6 . . ?
 C5 C4 C3 120.7(4) . . ?
 C5 C4 H4 119.6 . . ?
 C4 C5 H5 120.3 . . ?
 C4 C5 C6 119.4(4) . . ?
 C6 C5 H5 120.3 . . ?
 C5 C6 H6 119.6 . . ?
 C5 C6 C7 120.7(4) . . ?
 C7 C6 H6 119.6 . . ?
 C2 C7 H7 120.1 . . ?
 C6 C7 C2 119.9(4) . . ?
 C6 C7 H7 120.1 . . ?
 C9 C8 P1 119.0(3) . . ?
 C9 C8 C13 118.0(4) . . ?
 C13 C8 P1 122.9(3) . . ?
 C8 C9 H9 119.6 . . ?
 C10 C9 C8 120.8(4) . . ?
 C10 C9 H9 119.6 . . ?
 C9 C10 H10 119.7 . . ?
 C11 C10 C9 120.6(4) . . ?
 C11 C10 H10 119.7 . . ?
 C10 C11 H11 120.4 . . ?
 C10 C11 C12 119.1(4) . . ?
 C12 C11 H11 120.4 . . ?
 C11 C12 H12 119.6 . . ?
 C13 C12 C11 120.8(4) . . ?
 C13 C12 H12 119.6 . . ?
 C8 C13 H13 119.7 . . ?
 C12 C13 C8 120.6(4) . . ?
 C12 C13 H13 119.7 . . ?
 C15 C14 P2 121.7(3) . . ?
 C19 C14 P2 118.9(3) . . ?
 C19 C14 C15 119.1(3) . . ?
 C14 C15 H15 119.9 . . ?
 C16 C15 C14 120.3(4) . . ?
 C16 C15 H15 119.9 . . ?
 C15 C16 H16 119.8 . . ?
 C17 C16 C15 120.3(4) . . ?
 C17 C16 H16 119.8 . . ?
 C16 C17 H17 119.8 . . ?
 C16 C17 C18 120.4(4) . . ?
 C18 C17 H17 119.8 . . ?
 C17 C18 H18 120.4 . . ?
 C17 C18 C19 119.2(4) . . ?
 C19 C18 H18 120.4 . . ?
 C14 C19 C18 120.6(4) . . ?
 C14 C19 H19 119.7 . . ?
 C18 C19 H19 119.7 . . ?
 C21 C20 P2 120.7(3) . . ?
 C21 C20 C25 119.5(4) . . ?
 C25 C20 P2 119.3(3) . . ?
 C20 C21 H21 119.9 . . ?
 C22 C21 C20 120.2(4) . . ?
 C22 C21 H21 119.9 . . ?
 C21 C22 H22 119.9 . . ?
 C23 C22 C21 120.2(4) . . ?
 C23 C22 H22 119.9 . . ?
 C22 C23 H23 120.1 . . ?
 C22 C23 C24 119.8(4) . . ?
 C24 C23 H23 120.1 . . ?
 C23 C24 H24 119.8 . . ?
 C25 C24 C23 120.5(4) . . ?
 C25 C24 H24 119.8 . . ?
 C20 C25 H25 120.1 . . ?
 C24 C25 C20 119.8(4) . . ?
 C24 C25 H25 120.1 . . ?
 C27 C26 N1 120.6(3) . . ?
 C27 C26 C31 119.4(3) . . ?
 C31 C26 N1 119.7(3) . . ?
 C26 C27 C32 123.0(3) . . ?
 C28 C27 C26 119.0(4) . . ?
 C28 C27 C32 118.0(3) . . ?
 C27 C28 H28 118.7 . . ?
 C29 C28 C27 122.6(4) . . ?
 C29 C28 H28 118.7 . . ?
 C28 C29 C33 121.7(4) . . ?
 C30 C29 C28 117.3(4) . . ?
 C30 C29 C33 121.0(4) . . ?
 C29 C30 H30 118.5 . . ?
 C29 C30 C31 122.9(4) . . ?
 C31 C30 H30 118.5 . . ?
 C26 C31 C34 122.9(3) . . ?
 C30 C31 C26 118.8(4) . . ?
 C30 C31 C34 118.2(3) . . ?
 C27 C32 H32A 109.5 . . ?
 C27 C32 H32B 109.5 . . ?
 C27 C32 H32C 109.5 . . ?
 H32A C32 H32B 109.5 . . ?
 H32A C32 H32C 109.5 . . ?
 H32B C32 H32C 109.5 . . ?
 C29 C33 H33A 109.5 . . ?
 C29 C33 H33B 109.5 . . ?
 C29 C33 H33C 109.5 . . ?
 H33A C33 H33B 109.5 . . ?
 H33A C33 H33C 109.5 . . ?
 H33B C33 H33C 109.5 . . ?
 C31 C34 H34A 109.5 . . ?
 C31 C34 H34B 109.5 . . ?
 C31 C34 H34C 109.5 . . ?
 H34A C34 H34B 109.5 . . ?
 H34A C34 H34C 109.5 . . ?
 H34B C34 H34C 109.5 . . ?
 C36 C35 N2 121.5(3) . . ?
 C36 C35 C40 119.4(3) . . ?
 C40 C35 N2 119.2(3) . . ?
 C35 C36 C41 121.9(3) . . ?
 C37 C36 C35 119.0(3) . . ?
 C37 C36 C41 119.0(4) . . ?
 C36 C37 H37 118.7 . . ?
 C38 C37 C36 122.5(4) . . ?
 C38 C37 H37 118.7 . . ?
 C37 C38 C42 120.3(4) . . ?
 C39 C38 C37 117.4(4) . . ?
 C39 C38 C42 122.3(4) . . ?
 C38 C39 H39 118.5 . . ?
 C38 C39 C40 123.0(4) . . ?
 C40 C39 H39 118.5 . . ?
 C35 C40 C43 122.1(3) . . ?
 C39 C40 C35 118.6(4) . . ?
 C39 C40 C43 119.3(3) . . ?
 C36 C41 H41A 109.5 . . ?
 C36 C41 H41B 109.5 . . ?
 C36 C41 H41C 109.5 . . ?
 H41A C41 H41B 109.5 . . ?
 H41A C41 H41C 109.5 . . ?
 H41B C41 H41C 109.5 . . ?
 C38 C42 H42A 109.5 . . ?
 C38 C42 H42B 109.5 . . ?
 C38 C42 H42C 109.5 . . ?
 H42A C42 H42B 109.5 . . ?
 H42A C42 H42C 109.5 . . ?
 H42B C42 H42C 109.5 . . ?
 C40 C43 H43A 109.5 . . ?
 C40 C43 H43B 109.5 . . ?
 C40 C43 H43C 109.5 . . ?
 H43A C43 H43B 109.5 . . ?
 H43A C43 H43C 109.5 . . ?
 H43B C43 H43C 109.5 . . ?
 O1 C44 H44A 110.7 . . ?
 O1 C44 H44B 110.7 . . ?
 O1 C44 C45 105.3(3) . . ?
 H44A C44 H44B 108.8 . . ?
 C45 C44 H44A 110.7 . . ?
 C45 C44 H44B 110.7 . . ?
 C44 C45 H45A 111.7 . . ?
 C44 C45 H45B 111.7 . . ?
 C44 C45 C46 100.6(4) . . ?
 H45A C45 H45B 109.4 . . ?
 C46 C45 H45A 111.7 . . ?
 C46 C45 H45B 111.7 . . ?
 C45 C46 H46A 111.4 . . ?
 C45 C46 H46B 111.4 . . ?
 H46A C46 H46B 109.3 . . ?
 C47 C46 C45 101.6(3) . . ?
 C47 C46 H46A 111.4 . . ?
 C47 C46 H46B 111.4 . . ?
 O1 C47 C46 105.3(3) . . ?
 O1 C47 H47A 110.7 . . ?
 O1 C47 H47B 110.7 . . ?
 C46 C47 H47A 110.7 . . ?
 C46 C47 H47B 110.7 . . ?
 H47A C47 H47B 108.8 . . ?
 O2 C48 H48A 111.0 . . ?
 O2 C48 H48B 111.0 . . ?
 O2 C48 C49 104.0(4) . . ?
 H48A C48 H48B 109.0 . . ?
 C49 C48 H48A 111.0 . . ?
 C49 C48 H48B 111.0 . . ?
 C48 C49 H49A 111.0 . . ?
 C48 C49 H49B 111.0 . . ?
 C48 C49 C50 103.9(4) . . ?
 H49A C49 H49B 109.0 . . ?
 C50 C49 H49A 111.0 . . ?
 C50 C49 H49B 111.0 . . ?
 C49 C50 H50A 110.7 . . ?
 C49 C50 H50B 110.7 . . ?
 H50A C50 H50B 108.8 . . ?
 C51 C50 C49 105.1(4) . . ?
 C51 C50 H50A 110.7 . . ?
 C51 C50 H50B 110.7 . . ?
 O2 C51 C50 104.9(4) . . ?
 O2 C51 H51A 110.8 . . ?
 O2 C51 H51B 110.8 . . ?
 C50 C51 H51A 110.8 . . ?
 C50 C51 H51B 110.8 . . ?
 H51A C51 H51B 108.8 . . ?
 H52A C52 H52B 109.5 . . ?
 H52A C52 H52C 109.5 . . ?
 H52B C52 H52C 109.5 . . ?
 C53 C52 H52A 109.5 . . ?
 C53 C52 H52B 109.5 . . ?
 C53 C52 H52C 109.5 . . ?
 C54 C53 C52 120.6(4) . . ?
 C58 C53 C52 121.0(4) . . ?
 C58 C53 C54 118.4(4) . . ?
 C53 C54 H54 119.4 . . ?
 C55 C54 C53 121.2(4) . . ?
 C55 C54 H54 119.4 . . ?
 C54 C55 H55 119.8 . . ?
 C56 C55 C54 120.4(5) . . ?
 C56 C55 H55 119.8 . . ?
 C55 C56 H56 120.2 . . ?
 C55 C56 C57 119.6(4) . . ?
 C57 C56 H56 120.2 . . ?
 C56 C57 H57 119.9 . . ?
 C58 C57 C56 120.3(5) . . ?
 C58 C57 H57 119.9 . . ?
 C53 C58 C57 120.1(4) . . ?
 C53 C58 H58 119.9 . . ?
 C57 C58 H58 119.9 . . ?
 H59A C59 H59B 109.5 . . ?
 H59A C59 H59C 109.5 . . ?
 H59B C59 H59C 109.5 . . ?
 C60 C59 H59A 109.5 . . ?
 C60 C59 H59B 109.5 . . ?
 C60 C59 H59C 109.5 . . ?
 C65 C60 C59 119.4(5) . . ?
 C65 C60 C61 120.0 . . ?
 C61 C60 C59 120.6(5) . . ?
 C60 C65 H65 120.0 . . ?
 C60 C65 C64 120.0 . . ?
 C64 C65 H65 120.0 . . ?
 C65 C64 H64 120.0 . . ?
 C65 C64 C63 120.0 . . ?
 C63 C64 H64 120.0 . . ?
 C64 C63 H63 120.0 . . ?
 C62 C63 C64 120.0 . . ?
 C62 C63 H63 120.0 . . ?
 C63 C62 H62 120.0 . . ?
 C63 C62 C61 120.0 . . ?
 C61 C62 H62 120.0 . . ?
 C60 C61 H61 120.0 . . ?
 C62 C61 C60 120.0 . . ?
 C62 C61 H61 120.0 . . ?
 H66A C66 H66B 109.5 . . ?
 H66A C66 H66C 109.5 . . ?
 H66B C66 H66C 109.5 . . ?
 C67 C66 H66A 109.5 . . ?
 C67 C66 H66B 109.5 . . ?
 C67 C66 H66C 109.5 . . ?
 C68 C67 C66 122.7(4) . . ?
 C68 C67 C72 120.0 . . ?
 C72 C67 C66 117.3(4) . . ?
 C67 C68 H68 120.0 . . ?
 C67 C68 C69 120.0 . . ?
 C69 C68 H68 120.0 . . ?
 C68 C69 H69 120.0 . . ?
 C70 C69 C68 120.0 . . ?
 C70 C69 H69 120.0 . . ?
 C69 C70 H70 120.0 . . ?
 C69 C70 C71 120.0 . . ?
 C71 C70 H70 120.0 . . ?
 C70 C71 H71 120.0 . . ?
 C70 C71 C72 120.0 . . ?
 C72 C71 H71 120.0 . . ?
 C67 C72 H72 120.0 . . ?
 C71 C72 C67 120.0 . . ?
 C71 C72 H72 120.0 . . ?
 H80A C80 H80B 109.5 . . ?
 H80A C80 H80C 109.5 . . ?
 H80B C80 H80C 109.5 . . ?
 C81 C80 H80A 109.5 . . ?
 C81 C80 H80B 109.5 . . ?
 C81 C80 H80C 109.5 . . ?
 C86 C81 C80 121.5(7) . . ?
 C86 C81 C82 120.0 . . ?
 C82 C81 C80 118.3(7) . . ?
 C81 C86 H86 120.0 . . ?
 C81 C86 C85 120.0 . . ?
 C85 C86 H86 120.0 . . ?
 C86 C85 H85 120.0 . . ?
 C84 C85 C86 120.0 . . ?
 C84 C85 H85 120.0 . . ?
 C85 C84 H84 120.0 . . ?
 C83 C84 C85 120.0 . . ?
 C83 C84 H84 120.0 . . ?
 C84 C83 H83 120.0 . . ?
 C84 C83 C82 120.0 . . ?
 C82 C83 H83 120.0 . . ?
 C81 C82 H82 120.0 . . ?
 C83 C82 C81 120.0 . . ?
 C83 C82 H82 120.0 . . ?

loop_
  _geom_torsion_atom_site_label_1
  _geom_torsion_atom_site_label_2
  _geom_torsion_atom_site_label_3
  _geom_torsion_atom_site_label_4
  _geom_torsion
  _geom_torsion_site_symmetry_1
  _geom_torsion_site_symmetry_2
  _geom_torsion_site_symmetry_3
  _geom_torsion_site_symmetry_4
  _geom_torsion_publ_flag
 Gd1 O1 C44 C45 -167.6(3) . . . . ?
 Gd1 O1 C47 C46 -164.9(3) . . . . ?
 Gd1 O2 C48 C49 133.7(3) . . . . ?
 Gd1 O2 C51 C50 -137.1(4) . . . . ?
 Gd1 N1 C26 C27 79.7(4) . . . . ?
 Gd1 N1 C26 C31 -94.8(4) . . . . ?
 Gd1 N2 C35 C36 93.7(4) . . . . ?
 Gd1 N2 C35 C40 -84.9(4) . . . . ?
 P1 N1 C26 C27 -85.5(4) . . . . ?
 P1 N1 C26 C31 100.0(4) . . . . ?
 P1 C2 C3 C4 -174.4(3) . . . . ?
 P1 C2 C7 C6 173.6(3) . . . . ?
 P1 C8 C9 C10 178.7(3) . . . . ?
 P1 C8 C13 C12 179.7(3) . . . . ?
 P2 N2 C35 C36 -93.2(4) . . . . ?
 P2 N2 C35 C40 88.2(4) . . . . ?
 P2 C14 C15 C16 -172.8(3) . . . . ?
 P2 C14 C19 C18 172.1(3) . . . . ?
 P2 C20 C21 C22 -170.8(3) . . . . ?
 P2 C20 C25 C24 172.0(3) . . . . ?
 O1 C44 C45 C46 -37.6(5) . . . . ?
 O2 C48 C49 C50 28.7(6) . . . . ?
 N1 P1 C1 Gd1 -5.72(16) . . . . ?
 N1 P1 C1 P2 82.7(3) . . . . ?
 N1 P1 C2 C3 -157.7(3) . . . . ?
 N1 P1 C2 C7 30.5(4) . . . . ?
 N1 P1 C8 C9 -84.8(3) . . . . ?
 N1 P1 C8 C13 94.9(3) . . . . ?
 N1 C26 C27 C28 -176.4(3) . . . . ?
 N1 C26 C27 C32 1.7(6) . . . . ?
 N1 C26 C31 C30 177.4(3) . . . . ?
 N1 C26 C31 C34 -0.1(5) . . . . ?
 N2 P2 C1 Gd1 -21.68(15) . . . . ?
 N2 P2 C1 P1 -110.9(3) . . . . ?
 N2 P2 C14 C15 -140.0(3) . . . . ?
 N2 P2 C14 C19 45.9(4) . . . . ?
 N2 P2 C20 C21 -132.5(3) . . . . ?
 N2 P2 C20 C25 55.5(3) . . . . ?
 N2 C35 C36 C37 -177.5(3) . . . . ?
 N2 C35 C36 C41 4.2(6) . . . . ?
 N2 C35 C40 C39 175.7(4) . . . . ?
 N2 C35 C40 C43 -6.9(5) . . . . ?
 C1 P1 N1 Gd1 6.58(18) . . . . ?
 C1 P1 N1 C26 175.2(3) . . . . ?
 C1 P1 C2 C3 -36.3(4) . . . . ?
 C1 P1 C2 C7 151.9(3) . . . . ?
 C1 P1 C8 C9 159.3(3) . . . . ?
 C1 P1 C8 C13 -21.0(4) . . . . ?
 C1 P2 N2 Gd1 24.61(18) . . . . ?
 C1 P2 N2 C35 -150.5(3) . . . . ?
 C1 P2 C14 C15 103.0(3) . . . . ?
 C1 P2 C14 C19 -71.0(3) . . . . ?
 C1 P2 C20 C21 -15.0(4) . . . . ?
 C1 P2 C20 C25 173.0(3) . . . . ?
 C2 P1 N1 Gd1 132.56(15) . . . . ?
 C2 P1 N1 C26 -58.9(3) . . . . ?
 C2 P1 C1 Gd1 -134.05(15) . . . . ?
 C2 P1 C1 P2 -45.6(4) . . . . ?
 C2 P1 C8 C9 40.6(3) . . . . ?
 C2 P1 C8 C13 -139.7(3) . . . . ?
 C2 C3 C4 C5 0.9(6) . . . . ?
 C3 C2 C7 C6 1.9(6) . . . . ?
 C3 C4 C5 C6 0.6(6) . . . . ?
 C4 C5 C6 C7 -0.9(6) . . . . ?
 C5 C6 C7 C2 -0.4(6) . . . . ?
 C7 C2 C3 C4 -2.2(6) . . . . ?
 C8 P1 N1 Gd1 -111.87(16) . . . . ?
 C8 P1 N1 C26 56.7(3) . . . . ?
 C8 P1 C1 Gd1 116.26(14) . . . . ?
 C8 P1 C1 P2 -155.3(3) . . . . ?
 C8 P1 C2 C3 79.0(3) . . . . ?
 C8 P1 C2 C7 -92.8(3) . . . . ?
 C8 C9 C10 C11 1.1(7) . . . . ?
 C9 C8 C13 C12 -0.5(6) . . . . ?
 C9 C10 C11 C12 0.4(7) . . . . ?
 C10 C11 C12 C13 -2.0(6) . . . . ?
 C11 C12 C13 C8 2.1(6) . . . . ?
 C13 C8 C9 C10 -1.1(6) . . . . ?
 C14 P2 N2 Gd1 -95.65(17) . . . . ?
 C14 P2 N2 C35 89.2(3) . . . . ?
 C14 P2 C1 Gd1 103.04(15) . . . . ?
 C14 P2 C1 P1 13.8(4) . . . . ?
 C14 P2 C20 C21 102.0(3) . . . . ?
 C14 P2 C20 C25 -70.1(3) . . . . ?
 C14 C15 C16 C17 0.9(7) . . . . ?
 C15 C14 C19 C18 -2.1(6) . . . . ?
 C15 C16 C17 C18 -2.0(7) . . . . ?
 C16 C17 C18 C19 1.1(6) . . . . ?
 C17 C18 C19 C14 1.0(6) . . . . ?
 C19 C14 C15 C16 1.2(6) . . . . ?
 C20 P2 N2 Gd1 147.29(15) . . . . ?
 C20 P2 N2 C35 -27.8(4) . . . . ?
 C20 P2 C1 Gd1 -145.09(13) . . . . ?
 C20 P2 C1 P1 125.7(3) . . . . ?
 C20 P2 C14 C15 -16.2(4) . . . . ?
 C20 P2 C14 C19 169.8(3) . . . . ?
 C20 C21 C22 C23 -0.9(6) . . . . ?
 C21 C20 C25 C24 -0.1(6) . . . . ?
 C21 C22 C23 C24 -0.5(7) . . . . ?
 C22 C23 C24 C25 1.5(7) . . . . ?
 C23 C24 C25 C20 -1.3(7) . . . . ?
 C25 C20 C21 C22 1.2(6) . . . . ?
 C26 C27 C28 C29 -0.1(6) . . . . ?
 C27 C26 C31 C30 2.8(5) . . . . ?
 C27 C26 C31 C34 -174.7(3) . . . . ?
 C27 C28 C29 C30 1.1(6) . . . . ?
 C27 C28 C29 C33 -177.3(4) . . . . ?
 C28 C29 C30 C31 -0.1(6) . . . . ?
 C29 C30 C31 C26 -1.9(6) . . . . ?
 C29 C30 C31 C34 175.7(4) . . . . ?
 C31 C26 C27 C28 -1.9(5) . . . . ?
 C31 C26 C27 C32 176.2(3) . . . . ?
 C32 C27 C28 C29 -178.3(4) . . . . ?
 C33 C29 C30 C31 178.3(4) . . . . ?
 C35 C36 C37 C38 1.4(6) . . . . ?
 C36 C35 C40 C39 -2.9(6) . . . . ?
 C36 C35 C40 C43 174.5(4) . . . . ?
 C36 C37 C38 C39 -1.9(6) . . . . ?
 C36 C37 C38 C42 177.8(4) . . . . ?
 C37 C38 C39 C40 -0.1(7) . . . . ?
 C38 C39 C40 C35 2.4(6) . . . . ?
 C38 C39 C40 C43 -175.0(4) . . . . ?
 C40 C35 C36 C37 1.1(5) . . . . ?
 C40 C35 C36 C41 -177.2(4) . . . . ?
 C41 C36 C37 C38 179.7(4) . . . . ?
 C42 C38 C39 C40 -179.7(4) . . . . ?
 C44 O1 C47 C46 9.9(5) . . . . ?
 C44 C45 C46 C47 42.8(5) . . . . ?
 C45 C46 C47 O1 -33.0(5) . . . . ?
 C47 O1 C44 C45 17.7(4) . . . . ?
 C48 O2 C51 C50 39.7(5) . . . . ?
 C48 C49 C50 C51 -4.8(6) . . . . ?
 C49 C50 C51 O2 -21.0(6) . . . . ?
 C51 O2 C48 C49 -42.9(5) . . . . ?
 C52 C53 C54 C55 179.4(4) . . . . ?
 C52 C53 C58 C57 -179.4(4) . . . . ?
 C53 C54 C55 C56 -0.5(7) . . . . ?
 C54 C53 C58 C57 0.1(6) . . . . ?
 C54 C55 C56 C57 1.0(7) . . . . ?
 C55 C56 C57 C58 -1.0(7) . . . . ?
 C56 C57 C58 C53 0.4(7) . . . . ?
 C58 C53 C54 C55 -0.1(6) . . . . ?
 C59 C60 C65 C64 179.5(5) . . . . ?
 C59 C60 C61 C62 -179.5(5) . . . . ?
 C60 C65 C64 C63 0.0 . . . . ?
 C65 C60 C61 C62 0.0 . . . . ?
 C65 C64 C63 C62 0.0 . . . . ?
 C64 C63 C62 C61 0.0 . . . . ?
 C63 C62 C61 C60 0.0 . . . . ?
 C61 C60 C65 C64 0.0 . . . . ?
 C66 C67 C68 C69 179.0(5) . . . . ?
 C66 C67 C72 C71 -179.1(4) . . . . ?
 C67 C68 C69 C70 0.0 . . . . ?
 C68 C67 C72 C71 0.0 . . . . ?
 C68 C69 C70 C71 0.0 . . . . ?
 C69 C70 C71 C72 0.0 . . . . ?
 C70 C71 C72 C67 0.0 . . . . ?
 C72 C67 C68 C69 0.0 . . . . ?
 C80 C81 C86 C85 174.9(11) . . . . ?
 C80 C81 C82 C83 -175.1(11) . . . . ?
 C81 C86 C85 C84 0.0 . . . . ?
 C86 C81 C82 C83 0.0 . . . . ?
 C86 C85 C84 C83 0.0 . . . . ?
 C85 C84 C83 C82 0.0 . . . . ?
 C84 C83 C82 C81 0.0 . . . . ?
 C82 C81 C86 C85 0.0 . . . . ?

_shelx_estimated_absorpt_T_max    ?
_shelx_estimated_absorpt_T_min    ?
_shelx_space_group_comment
;
The symmetry employed for this shelxl refinement is uniquely defined
by the following loop, which should always be used as a source of
symmetry information in preference to the above space-group names.
They are only intended as comments.
;
_shelxl_version_number            2013-4

#=== END


 
data_4 

_refine_special_details 
; 
 Highly disordered lattice solvent moleculess (291 electons per unit cell)
were accounted for using the PLATON SQUEEZE procedure (P. v.d. Sluis &
A.L. Spek, Acta Cryst. 1990, A46, 194-201). The total volume of the void
was 559 A*3, equating to 3 molecules of TOLUENE per 
molecule in the unit cell. Although solvent atoms were not included in the 
refinement model they are included in the formulae and in the calculation
of the formula weight, density, mu, F(000), etc. 
SIMU and delu commands wre employed to resolve displacement problems of Yb1, P1 and C2.
;
 
_nottingham_internal_coll_name         YBAWLA
_nottingham_internal_coll_number       9220
_nottingham_internal_coll_client       AW/STL
_nottingham_internal_coll_type         sphere
_nottingham_internal_coll_frame_time   '40 s'
_nottingham_internal_coll_frame_width  '0.3 degrees'
_nottingham_internal_coll_frame_method '\w'
_nottingham_internal_coll_user         AW
_nottingham_internal_coll_date         8/05/2010
_nottingham_internal_process_user      AW
_nottingham_internal_process_date      10/05/2010
_nottingham_internal_solution_user     AW
_nottingham_internal_solution_date     10/05/2010
_nottingham_internal_refinement_user   AW/STL
_nottingham_internal_refinement_date   11/05/2010
_nottingham_internal_validation_user   ?
_nottingham_internal_validation_date   ?
_nottingham_internal_archive_date      ?

_audit_creation_method           'enCIFer editing of SHELXL97 CIF output'
_chemical_name_systematic 
; 
 ? 
; 
_chemical_name_common             ? 
_chemical_melting_point           ? 
_chemical_formula_moiety          'C47 H51 I2 N2 O P2 Yb, 3 C7 H8' 
_chemical_formula_sum             'C68 H75 I2 N2 O P2 Yb' 
_chemical_formula_weight          1425.08 
 
loop_ 
 _atom_type_symbol 
 _atom_type_description 
 _atom_type_scat_dispersion_real 
 _atom_type_scat_dispersion_imag 
 _atom_type_scat_source 
 'C'  'C'   0.0033   0.0016 
 'International Tables Vol C Tables 4.2.6.8 and 6.1.1.4' 
 'H'  'H'   0.0000   0.0000 
 'International Tables Vol C Tables 4.2.6.8 and 6.1.1.4' 
 'N'  'N'   0.0061   0.0033 
 'International Tables Vol C Tables 4.2.6.8 and 6.1.1.4' 
 'O'  'O'   0.0106   0.0060 
 'International Tables Vol C Tables 4.2.6.8 and 6.1.1.4' 
 'P'  'P'   0.1023   0.0942 
 'International Tables Vol C Tables 4.2.6.8 and 6.1.1.4' 
 'I'  'I'  -0.4742   1.8119 
 'International Tables Vol C Tables 4.2.6.8 and 6.1.1.4' 
 'Yb'  'Yb'  -0.3850   5.5486 
 'International Tables Vol C Tables 4.2.6.8 and 6.1.1.4' 
 
_symmetry_cell_setting            'Triclinic'
_symmetry_space_group_name_H-M    'P-1   '
 
loop_ 
 _symmetry_equiv_pos_as_xyz 
 'x, y, z' 
 '-x, -y, -z' 
 
_cell_length_a                    12.209(3) 
_cell_length_b                    13.057(3) 
_cell_length_c                    17.560(5) 
_cell_angle_alpha                 80.744(4) 
_cell_angle_beta                  75.234(4) 
_cell_angle_gamma                 77.456(4) 
_cell_volume                      2625.6(12) 
_cell_formula_units_Z             2 
_cell_measurement_temperature     90(2)
_cell_measurement_reflns_used     6342
_cell_measurement_theta_min       2.15
_cell_measurement_theta_max       27.44
 
_exptl_crystal_description        'LATH'
_exptl_crystal_colour             'PALE ORANGE'
_exptl_crystal_size_min           0.03
_exptl_crystal_size_mid           0.08
_exptl_crystal_size_max           0.21
_exptl_crystal_density_meas       ? 
_exptl_crystal_density_diffrn     1.803 
_exptl_crystal_density_method     'not measured' 
_exptl_crystal_F_000              1422 
_exptl_absorpt_coefficient_mu     3.068 
_exptl_absorpt_correction_type    multi-scan
_exptl_absorpt_correction_T_min   0.425
_exptl_absorpt_correction_T_max   0.746
_exptl_absorpt_process_details    'SADABS 2007/2'
 
_exptl_special_details 
; 
 ? 
; 
 
_diffrn_ambient_temperature       90(2) 
_diffrn_radiation_wavelength      0.71073 
_diffrn_radiation_type            MoK\a 
_diffrn_radiation_source          'normal-focus sealed tube' 
_diffrn_radiation_monochromator   graphite
_diffrn_measurement_device_type   'Bruker SMART APEX CCD diffractometer'
_diffrn_measurement_method        '\w rotation with narrow frames'
_diffrn_detector_area_resol_mean  ?
_diffrn_standards_number          0
_diffrn_standards_interval_count  .
_diffrn_standards_interval_time   ?
_diffrn_standards_decay_%         0
_diffrn_reflns_number             22426 
_diffrn_reflns_av_R_equivalents   0.0744 
_diffrn_reflns_av_sigmaI/netI     0.1340 
_diffrn_reflns_limit_h_min        -15 
_diffrn_reflns_limit_h_max        15 
_diffrn_reflns_limit_k_min        -16 
_diffrn_reflns_limit_k_max        16 
_diffrn_reflns_limit_l_min        -22 
_diffrn_reflns_limit_l_max        22 
_diffrn_reflns_theta_min          2.12 
_diffrn_reflns_theta_max          27.56 
_reflns_number_total              11730 
_reflns_number_gt                 7643 
_reflns_threshold_expression      I>2\s(I)

_computing_data_collection        'Bruker SMART version 5.625 (Bruker, 2001)' 
_computing_cell_refinement        'Bruker SAINT version 6.36A (Bruker, 2000)' 
_computing_data_reduction         'Bruker SAINT; SHELXTL (Sheldrick, 2008)' 
_computing_structure_solution     'SHELXTL (Sheldrick, 2008)' 
_computing_structure_refinement   'SHELXL97 (Sheldrick, 2008)' 
_computing_molecular_graphics     'SHELXTL (Sheldrick, 2008)' 
_computing_publication_material   'enCIFer(Allen et al., 2004); PLATON (Spek, 2009)'


 
_refine_ls_structure_factor_coef  Fsqd  
_refine_ls_matrix_type            full 
_refine_ls_weighting_scheme       calc  
_refine_ls_weighting_details 
 'calc w=1/[\s^2^(Fo^2^)+(0.1703P)^2^+38.8209P] where P=(Fo^2^+2Fc^2^)/3' 
_atom_sites_solution_primary      direct 
_atom_sites_solution_secondary    difmap 
_atom_sites_solution_hydrogens   'geom, Me from difmap'
_refine_ls_hydrogen_treatment     constr
_refine_ls_extinction_method      none 
_refine_ls_extinction_coef        ? 
_refine_ls_number_reflns          11730 
_refine_ls_number_parameters      502 
_refine_ls_number_restraints      472 
_refine_ls_R_factor_all           0.1439 
_refine_ls_R_factor_gt            0.1097 
_refine_ls_wR_factor_ref          0.3027 
_refine_ls_wR_factor_gt           0.2865 
_refine_ls_goodness_of_fit_ref    1.065 
_refine_ls_restrained_S_all       1.045 
_refine_ls_shift/su_max           0.000 
_refine_ls_shift/su_mean          0.000 
 
loop_ 
 _atom_site_label 
 _atom_site_type_symbol 
 _atom_site_fract_x 
 _atom_site_fract_y 
 _atom_site_fract_z 
 _atom_site_U_iso_or_equiv 
 _atom_site_adp_type 
 _atom_site_occupancy 
 _atom_site_symmetry_multiplicity 
 _atom_site_calc_flag 
 _atom_site_refinement_flags 
 _atom_site_disorder_assembly 
 _atom_site_disorder_group 
Yb1 Yb 0.42553(6) 0.22044(5) 0.79559(4) 0.01434(19) Uani 1 1 d U . . 
C1 C 0.3120(14) 0.3282(11) 0.6925(9) 0.0167(9) Uani 1 1 d U . . 
H1 H 0.3658 0.3342 0.6392 0.020 Uiso 1 1 calc R . . 
P1 P 0.2430(4) 0.2213(3) 0.7009(2) 0.0173(6) Uani 1 1 d U . . 
C2 C 0.0879(15) 0.2464(12) 0.7042(11) 0.0233(13) Uani 1 1 d U . . 
C3 C 0.0164(15) 0.3433(12) 0.7142(11) 0.0241(14) Uani 1 1 d U . . 
H3 H 0.0493 0.4021 0.7165 0.029 Uiso 1 1 calc R . . 
C4 C -0.0990(15) 0.3579(12) 0.7209(11) 0.0248(15) Uani 1 1 d U . . 
H4 H -0.1457 0.4252 0.7294 0.030 Uiso 1 1 calc R . . 
C5 C -0.1499(15) 0.2716(12) 0.7151(11) 0.0248(15) Uani 1 1 d U . . 
H5 H -0.2306 0.2801 0.7200 0.030 Uiso 1 1 calc R . . 
C6 C -0.0772(15) 0.1740(12) 0.7020(11) 0.0240(14) Uani 1 1 d U . . 
H6 H -0.1087 0.1160 0.6963 0.029 Uiso 1 1 calc R . . 
C7 C 0.0423(14) 0.1604(12) 0.6972(10) 0.0234(14) Uani 1 1 d U . . 
H7 H 0.0907 0.0936 0.6893 0.028 Uiso 1 1 calc R . . 
C8 C 0.2965(15) 0.1692(12) 0.6062(10) 0.0228(14) Uani 1 1 d U . . 
C9 C 0.3112(15) 0.2369(12) 0.5352(10) 0.0232(14) Uani 1 1 d U . . 
H9 H 0.2957 0.3110 0.5376 0.028 Uiso 1 1 calc R . . 
C10 C 0.3486(15) 0.1982(12) 0.4602(10) 0.0235(15) Uani 1 1 d U . . 
H10 H 0.3630 0.2449 0.4128 0.028 Uiso 1 1 calc R . . 
C11 C 0.3637(15) 0.0902(12) 0.4577(10) 0.0238(15) Uani 1 1 d U . . 
H11 H 0.3841 0.0626 0.4081 0.029 Uiso 1 1 calc R . . 
C12 C 0.3491(15) 0.0225(12) 0.5275(10) 0.0236(15) Uani 1 1 d U . . 
H12 H 0.3624 -0.0514 0.5251 0.028 Uiso 1 1 calc R . . 
C13 C 0.3152(15) 0.0613(12) 0.6014(10) 0.0230(15) Uani 1 1 d U . . 
H13 H 0.3048 0.0136 0.6485 0.028 Uiso 1 1 calc R . . 
N1 N 0.2802(12) 0.1457(9) 0.7773(8) 0.0179(7) Uani 1 1 d U . . 
C14 C 0.2387(14) 0.0497(11) 0.8133(9) 0.0192(9) Uani 1 1 d U . . 
C15 C 0.1277(14) 0.0527(11) 0.8624(9) 0.0201(11) Uani 1 1 d U . . 
C16 C 0.0873(15) -0.0423(11) 0.8943(9) 0.0208(12) Uani 1 1 d U . . 
H16 H 0.0102 -0.0399 0.9241 0.025 Uiso 1 1 calc R . . 
C17 C 0.1607(15) -0.1408(11) 0.8820(10) 0.0214(12) Uani 1 1 d U . . 
C18 C 0.2715(14) -0.1414(11) 0.8393(9) 0.0211(12) Uani 1 1 d U . . 
H18 H 0.3215 -0.2078 0.8331 0.025 Uiso 1 1 calc R . . 
C19 C 0.3168(14) -0.0484(11) 0.8036(9) 0.0203(11) Uani 1 1 d U . . 
C20 C 0.4395(14) -0.0543(11) 0.7637(10) 0.0208(15) Uani 1 1 d U . . 
H20B H 0.4781 -0.1285 0.7641 0.031 Uiso 1 1 calc R . . 
H20C H 0.4758 -0.0169 0.7917 0.031 Uiso 1 1 calc R . . 
H20A H 0.4461 -0.0216 0.7089 0.031 Uiso 1 1 calc R . . 
C21 C 0.0498(14) 0.1532(11) 0.8861(10) 0.0211(15) Uani 1 1 d U . . 
H21B H 0.0948 0.2096 0.8763 0.032 Uiso 1 1 calc R . . 
H21C H 0.0126 0.1436 0.9426 0.032 Uiso 1 1 calc R . . 
H21A H -0.0093 0.1725 0.8550 0.032 Uiso 1 1 calc R . . 
C22 C 0.1164(15) -0.2438(11) 0.9144(10) 0.0222(15) Uani 1 1 d U . . 
H22A H 0.1395 -0.2913 0.8728 0.033 Uiso 1 1 calc R . . 
H22B H 0.0321 -0.2286 0.9313 0.033 Uiso 1 1 calc R . . 
H22C H 0.1491 -0.2776 0.9597 0.033 Uiso 1 1 calc R . . 
P2 P 0.3014(3) 0.4374(3) 0.7389(2) 0.0154(6) Uani 1 1 d U . . 
C23 C 0.1583(14) 0.4810(12) 0.7966(10) 0.0216(14) Uani 1 1 d U . . 
C24 C 0.0852(14) 0.5688(12) 0.7709(10) 0.0222(15) Uani 1 1 d U . . 
H24 H 0.1110 0.6092 0.7220 0.027 Uiso 1 1 calc R . . 
C25 C -0.0215(14) 0.5976(13) 0.8142(10) 0.0234(15) Uani 1 1 d U . . 
H25 H -0.0693 0.6597 0.7962 0.028 Uiso 1 1 calc R . . 
C26 C -0.0661(15) 0.5367(12) 0.8876(10) 0.0235(15) Uani 1 1 d U . . 
H26 H -0.1425 0.5569 0.9175 0.028 Uiso 1 1 calc R . . 
C27 C 0.0069(14) 0.4474(12) 0.9127(10) 0.0229(15) Uani 1 1 d U . . 
H27 H -0.0194 0.4055 0.9606 0.028 Uiso 1 1 calc R . . 
C28 C 0.1163(14) 0.4197(12) 0.8687(10) 0.0221(15) Uani 1 1 d U . . 
H28 H 0.1653 0.3584 0.8865 0.027 Uiso 1 1 calc R . . 
C29 C 0.3311(15) 0.5497(11) 0.6658(9) 0.0206(14) Uani 1 1 d U . . 
C30 C 0.3410(14) 0.6430(11) 0.6910(10) 0.0209(14) Uani 1 1 d U . . 
H30 H 0.3237 0.6495 0.7462 0.025 Uiso 1 1 calc R . . 
C31 C 0.3750(14) 0.7246(11) 0.6379(9) 0.0213(15) Uani 1 1 d U . . 
H31 H 0.3824 0.7872 0.6557 0.026 Uiso 1 1 calc R . . 
C32 C 0.3989(15) 0.7153(12) 0.5572(9) 0.0217(15) Uani 1 1 d U . . 
H32 H 0.4234 0.7720 0.5202 0.026 Uiso 1 1 calc R . . 
C33 C 0.3880(15) 0.6256(11) 0.5295(10) 0.0218(15) Uani 1 1 d U . . 
H33 H 0.4038 0.6208 0.4742 0.026 Uiso 1 1 calc R . . 
C34 C 0.3527(15) 0.5411(11) 0.5850(9) 0.0210(14) Uani 1 1 d U . . 
H34 H 0.3439 0.4789 0.5674 0.025 Uiso 1 1 calc R . . 
N2 N 0.4024(11) 0.3975(9) 0.7903(7) 0.0161(7) Uani 1 1 d U . . 
C35 C 0.4582(14) 0.4766(11) 0.8075(9) 0.0169(8) Uani 1 1 d U . . 
C36 C 0.5538(14) 0.5037(11) 0.7542(9) 0.0173(10) Uani 1 1 d U . . 
C37 C 0.6097(14) 0.5789(11) 0.7730(9) 0.0178(11) Uani 1 1 d U . . 
H37 H 0.6752 0.5993 0.7362 0.021 Uiso 1 1 calc R . . 
C38 C 0.5696(14) 0.6221(11) 0.8442(9) 0.0186(11) Uani 1 1 d U . . 
C39 C 0.4780(14) 0.5882(11) 0.8985(9) 0.0180(11) Uani 1 1 d U . . 
H39 H 0.4523 0.6159 0.9482 0.022 Uiso 1 1 calc R . . 
C40 C 0.4222(14) 0.5147(11) 0.8830(9) 0.0173(10) Uani 1 1 d U . . 
C41 C 0.3220(14) 0.4828(11) 0.9455(9) 0.0178(14) Uani 1 1 d U . . 
H41C H 0.3234 0.5031 0.9965 0.027 Uiso 1 1 calc R . . 
H41A H 0.3276 0.4061 0.9499 0.027 Uiso 1 1 calc R . . 
H41B H 0.2498 0.5183 0.9307 0.027 Uiso 1 1 calc R . . 
C42 C 0.5965(14) 0.4661(11) 0.6731(9) 0.0174(13) Uani 1 1 d U . . 
H42A H 0.5804 0.3952 0.6756 0.026 Uiso 1 1 calc R . . 
H42C H 0.6798 0.4641 0.6555 0.026 Uiso 1 1 calc R . . 
H42B H 0.5572 0.5146 0.6356 0.026 Uiso 1 1 calc R . . 
C43 C 0.6306(14) 0.7030(11) 0.8612(9) 0.0192(14) Uani 1 1 d U . . 
H43B H 0.5742 0.7547 0.8927 0.029 Uiso 1 1 calc R . . 
H43A H 0.6678 0.7393 0.8111 0.029 Uiso 1 1 calc R . . 
H43C H 0.6890 0.6673 0.8907 0.029 Uiso 1 1 calc R . . 
I1 I 0.60994(9) 0.15552(7) 0.65569(6) 0.0202(3) Uani 1 1 d U . . 
I2 I 0.32660(10) 0.15579(8) 0.96522(6) 0.0239(3) Uani 1 1 d U . . 
O1 O 0.5886(10) 0.2008(9) 0.8491(7) 0.0222(10) Uani 1 1 d U . . 
C44 C 0.6616(15) 0.0947(12) 0.8602(10) 0.0230(12) Uani 1 1 d U . . 
H44B H 0.7049 0.0707 0.8084 0.028 Uiso 1 1 calc R . . 
H44A H 0.6136 0.0423 0.8891 0.028 Uiso 1 1 calc R . . 
C45 C 0.7427(15) 0.1087(13) 0.9079(10) 0.0235(13) Uani 1 1 d U . . 
H45A H 0.8118 0.1338 0.8735 0.028 Uiso 1 1 calc R . . 
H45B H 0.7671 0.0423 0.9404 0.028 Uiso 1 1 calc R . . 
C46 C 0.6669(15) 0.1926(12) 0.9594(10) 0.0234(12) Uani 1 1 d U . . 
H46B H 0.7143 0.2294 0.9801 0.028 Uiso 1 1 calc R . . 
H46A H 0.6130 0.1610 1.0046 0.028 Uiso 1 1 calc R . . 
C47 C 0.6013(15) 0.2688(12) 0.9024(10) 0.0226(11) Uani 1 1 d U . . 
H47A H 0.5252 0.3037 0.9314 0.027 Uiso 1 1 calc R . . 
H47B H 0.6460 0.3235 0.8732 0.027 Uiso 1 1 calc R . . 
 
loop_ 
 _atom_site_aniso_label 
 _atom_site_aniso_U_11 
 _atom_site_aniso_U_22 
 _atom_site_aniso_U_33 
 _atom_site_aniso_U_23 
 _atom_site_aniso_U_13 
 _atom_site_aniso_U_12 
Yb1 0.0245(4) 0.0020(3) 0.0145(3) -0.0003(2) -0.0004(2) -0.0035(2) 
C1 0.028(2) 0.004(2) 0.018(3) -0.0006(12) -0.004(2) -0.0050(16) 
P1 0.0272(14) 0.0019(12) 0.0224(14) -0.0009(11) -0.0039(11) -0.0046(11) 
C2 0.0291(18) 0.004(3) 0.039(4) -0.004(3) -0.010(2) -0.0026(18) 
C3 0.030(2) 0.004(3) 0.040(4) -0.004(3) -0.011(3) -0.0021(19) 
C4 0.030(2) 0.005(3) 0.040(4) -0.004(3) -0.011(3) -0.002(2) 
C5 0.030(2) 0.006(3) 0.040(4) -0.004(3) -0.011(3) -0.002(2) 
C6 0.029(2) 0.005(3) 0.040(4) -0.004(3) -0.011(3) -0.003(2) 
C7 0.029(2) 0.004(3) 0.039(4) -0.004(3) -0.011(3) -0.003(2) 
C8 0.037(3) 0.010(3) 0.0235(18) -0.005(2) -0.007(2) -0.006(3) 
C9 0.037(4) 0.010(3) 0.0232(19) -0.005(2) -0.006(3) -0.006(3) 
C10 0.038(4) 0.011(3) 0.023(2) -0.006(2) -0.006(3) -0.006(3) 
C11 0.038(4) 0.011(3) 0.024(2) -0.006(2) -0.006(3) -0.005(3) 
C12 0.038(4) 0.011(3) 0.024(2) -0.006(2) -0.007(3) -0.005(3) 
C13 0.037(4) 0.010(3) 0.024(2) -0.006(2) -0.007(3) -0.005(3) 
N1 0.0284(14) 0.0026(15) 0.0226(15) -0.0011(14) -0.0040(13) -0.0047(13) 
C14 0.0299(19) 0.0032(16) 0.0240(19) -0.0007(15) -0.0042(17) -0.0052(14) 
C15 0.031(2) 0.0041(19) 0.025(2) -0.0004(19) -0.0035(19) -0.0050(17) 
C16 0.032(2) 0.005(2) 0.025(2) 0.000(2) -0.004(2) -0.0055(18) 
C17 0.033(2) 0.005(2) 0.025(2) 0.000(2) -0.003(2) -0.0052(19) 
C18 0.033(2) 0.0041(18) 0.025(2) 0.000(2) -0.004(2) -0.0048(19) 
C19 0.031(2) 0.0034(17) 0.025(2) -0.0009(19) -0.004(2) -0.0043(17) 
C20 0.032(2) 0.003(2) 0.026(3) -0.001(2) -0.003(3) -0.004(2) 
C21 0.031(3) 0.005(2) 0.025(3) 0.000(2) -0.003(2) -0.004(2) 
C22 0.034(3) 0.005(2) 0.026(3) 0.000(3) -0.003(3) -0.006(2) 
P2 0.0248(16) 0.0026(10) 0.0179(15) -0.0010(9) -0.0019(11) -0.0042(10) 
C23 0.024(2) 0.012(3) 0.026(3) -0.006(2) 0.0009(19) -0.005(2) 
C24 0.025(2) 0.013(3) 0.027(3) -0.006(2) 0.001(2) -0.004(2) 
C25 0.025(2) 0.014(3) 0.028(3) -0.005(3) 0.001(2) -0.003(2) 
C26 0.025(3) 0.015(3) 0.028(3) -0.005(3) 0.002(2) -0.004(2) 
C27 0.025(3) 0.014(3) 0.027(3) -0.005(3) 0.002(2) -0.004(2) 
C28 0.025(2) 0.013(3) 0.026(3) -0.006(2) 0.002(2) -0.005(2) 
C29 0.034(4) 0.005(2) 0.021(3) 0.0012(18) -0.002(2) -0.009(2) 
C30 0.034(4) 0.006(2) 0.022(3) 0.001(2) -0.001(2) -0.009(3) 
C31 0.034(4) 0.005(2) 0.023(3) 0.001(2) -0.001(3) -0.009(3) 
C32 0.034(4) 0.006(2) 0.022(3) 0.001(2) 0.000(3) -0.008(3) 
C33 0.035(4) 0.006(2) 0.022(3) 0.001(2) 0.000(3) -0.008(3) 
C34 0.034(4) 0.006(2) 0.021(2) 0.001(2) -0.001(2) -0.008(3) 
N2 0.0256(18) 0.0037(11) 0.0188(17) -0.0020(10) -0.0018(13) -0.0054(11) 
C35 0.026(2) 0.0046(14) 0.0199(19) -0.0018(15) -0.0026(16) -0.0060(14) 
C36 0.026(2) 0.0054(19) 0.020(2) -0.0012(18) -0.0028(19) -0.0063(16) 
C37 0.027(2) 0.005(2) 0.021(2) -0.0012(19) -0.004(2) -0.0065(18) 
C38 0.029(3) 0.005(2) 0.022(2) -0.0016(19) -0.004(2) -0.0067(19) 
C39 0.029(3) 0.005(2) 0.021(2) -0.0018(18) -0.004(2) -0.0062(19) 
C40 0.028(2) 0.0050(19) 0.020(2) -0.0019(17) -0.0032(19) -0.0058(18) 
C41 0.028(3) 0.006(3) 0.020(3) -0.002(2) -0.003(2) -0.005(2) 
C42 0.026(3) 0.006(3) 0.020(2) -0.001(2) -0.002(2) -0.007(2) 
C43 0.030(3) 0.006(3) 0.023(3) -0.002(2) -0.004(3) -0.007(2) 
I1 0.0303(6) 0.0070(4) 0.0197(5) -0.0040(4) 0.0021(4) -0.0035(4) 
I2 0.0413(7) 0.0128(5) 0.0166(5) 0.0020(4) -0.0003(4) -0.0125(4) 
O1 0.029(2) 0.014(3) 0.024(2) -0.004(2) -0.0072(15) -0.002(2) 
C44 0.030(2) 0.014(3) 0.025(2) -0.004(3) -0.0078(19) -0.002(2) 
C45 0.030(3) 0.015(3) 0.026(3) -0.004(3) -0.008(2) -0.002(2) 
C46 0.030(3) 0.015(3) 0.025(3) -0.004(3) -0.0079(19) -0.003(2) 
C47 0.030(2) 0.014(3) 0.025(2) -0.004(3) -0.0079(18) -0.003(2) 
 
_geom_special_details 
; 
 All esds (except the esd in the dihedral angle between two l.s. planes) 
 are estimated using the full covariance matrix.  The cell esds are taken 
 into account individually in the estimation of esds in distances, angles 
 and torsion angles; correlations between esds in cell parameters are only 
 used when they are defined by crystal symmetry.  An approximate (isotropic) 
 treatment of cell esds is used for estimating esds involving l.s. planes. 
; 
 
loop_ 
 _geom_bond_atom_site_label_1 
 _geom_bond_atom_site_label_2 
 _geom_bond_distance 
 _geom_bond_site_symmetry_2 
 _geom_bond_publ_flag 
Yb1 N2 2.257(11) . ? 
Yb1 N1 2.313(13) . ? 
Yb1 O1 2.359(12) . ? 
Yb1 C1 2.606(15) . ? 
Yb1 I2 2.9738(13) . ? 
Yb1 I1 2.9739(12) . ? 
C1 P2 1.718(15) . ? 
C1 P1 1.748(15) . ? 
C1 H1 1.0000 . ? 
P1 N1 1.634(13) . ? 
P1 C8 1.810(16) . ? 
P1 C2 1.838(18) . ? 
C2 C3 1.38(2) . ? 
C2 C7 1.39(2) . ? 
C3 C4 1.36(2) . ? 
C3 H3 0.9500 . ? 
C4 C5 1.43(2) . ? 
C4 H4 0.9500 . ? 
C5 C6 1.40(2) . ? 
C5 H5 0.9500 . ? 
C6 C7 1.41(2) . ? 
C6 H6 0.9500 . ? 
C7 H7 0.9500 . ? 
C8 C13 1.39(2) . ? 
C8 C9 1.40(2) . ? 
C9 C10 1.42(2) . ? 
C9 H9 0.9500 . ? 
C10 C11 1.39(2) . ? 
C10 H10 0.9500 . ? 
C11 C12 1.39(2) . ? 
C11 H11 0.9500 . ? 
C12 C13 1.40(2) . ? 
C12 H12 0.9500 . ? 
C13 H13 0.9500 . ? 
N1 C14 1.443(18) . ? 
C14 C15 1.41(2) . ? 
C14 C19 1.43(2) . ? 
C15 C16 1.41(2) . ? 
C15 C21 1.49(2) . ? 
C16 C17 1.41(2) . ? 
C16 H16 0.9500 . ? 
C17 C18 1.37(2) . ? 
C17 C22 1.53(2) . ? 
C18 C19 1.43(2) . ? 
C18 H18 0.9500 . ? 
C19 C20 1.47(2) . ? 
C20 H20B 0.9800 . ? 
C20 H20C 0.9800 . ? 
C20 H20A 0.9800 . ? 
C21 H21B 0.9800 . ? 
C21 H21C 0.9800 . ? 
C21 H21A 0.9800 . ? 
C22 H22A 0.9800 . ? 
C22 H22B 0.9800 . ? 
C22 H22C 0.9800 . ? 
P2 N2 1.657(14) . ? 
P2 C23 1.804(16) . ? 
P2 C29 1.821(15) . ? 
C23 C24 1.38(2) . ? 
C23 C28 1.42(2) . ? 
C24 C25 1.34(2) . ? 
C24 H24 0.9500 . ? 
C25 C26 1.45(2) . ? 
C25 H25 0.9500 . ? 
C26 C27 1.39(2) . ? 
C26 H26 0.9500 . ? 
C27 C28 1.37(2) . ? 
C27 H27 0.9500 . ? 
C28 H28 0.9500 . ? 
C29 C34 1.39(2) . ? 
C29 C30 1.40(2) . ? 
C30 C31 1.36(2) . ? 
C30 H30 0.9500 . ? 
C31 C32 1.39(2) . ? 
C31 H31 0.9500 . ? 
C32 C33 1.38(2) . ? 
C32 H32 0.9500 . ? 
C33 C34 1.41(2) . ? 
C33 H33 0.9500 . ? 
C34 H34 0.9500 . ? 
N2 C35 1.461(18) . ? 
C35 C36 1.37(2) . ? 
C35 C40 1.42(2) . ? 
C36 C37 1.43(2) . ? 
C36 C42 1.51(2) . ? 
C37 C38 1.38(2) . ? 
C37 H37 0.9500 . ? 
C38 C39 1.38(2) . ? 
C38 C43 1.52(2) . ? 
C39 C40 1.39(2) . ? 
C39 H39 0.9500 . ? 
C40 C41 1.50(2) . ? 
C41 H41C 0.9800 . ? 
C41 H41A 0.9800 . ? 
C41 H41B 0.9800 . ? 
C42 H42A 0.9800 . ? 
C42 H42C 0.9800 . ? 
C42 H42B 0.9800 . ? 
C43 H43B 0.9800 . ? 
C43 H43A 0.9800 . ? 
C43 H43C 0.9800 . ? 
O1 C47 1.446(19) . ? 
O1 C44 1.489(19) . ? 
C44 C45 1.50(2) . ? 
C44 H44B 0.9900 . ? 
C44 H44A 0.9900 . ? 
C45 C46 1.53(2) . ? 
C45 H45A 0.9900 . ? 
C45 H45B 0.9900 . ? 
C46 C47 1.54(2) . ? 
C46 H46B 0.9900 . ? 
C46 H46A 0.9900 . ? 
C47 H47A 0.9900 . ? 
C47 H47B 0.9900 . ? 
 
loop_ 
 _geom_angle_atom_site_label_1 
 _geom_angle_atom_site_label_2 
 _geom_angle_atom_site_label_3 
 _geom_angle 
 _geom_angle_site_symmetry_1 
 _geom_angle_site_symmetry_3 
 _geom_angle_publ_flag 
N2 Yb1 N1 119.8(5) . . ? 
N2 Yb1 O1 89.9(4) . . ? 
N1 Yb1 O1 148.0(4) . . ? 
N2 Yb1 C1 64.9(5) . . ? 
N1 Yb1 C1 64.8(4) . . ? 
O1 Yb1 C1 146.1(4) . . ? 
N2 Yb1 I2 103.0(3) . . ? 
N1 Yb1 I2 82.3(3) . . ? 
O1 Yb1 I2 79.4(3) . . ? 
C1 Yb1 I2 126.4(3) . . ? 
N2 Yb1 I1 107.0(3) . . ? 
N1 Yb1 I1 99.8(3) . . ? 
O1 Yb1 I1 80.4(3) . . ? 
C1 Yb1 I1 85.6(3) . . ? 
I2 Yb1 I1 143.60(4) . . ? 
P2 C1 P1 140.3(10) . . ? 
P2 C1 Yb1 87.2(6) . . ? 
P1 C1 Yb1 88.4(6) . . ? 
P2 C1 H1 109.3 . . ? 
P1 C1 H1 109.3 . . ? 
Yb1 C1 H1 109.3 . . ? 
N1 P1 C1 103.0(7) . . ? 
N1 P1 C8 116.6(7) . . ? 
C1 P1 C8 105.0(7) . . ? 
N1 P1 C2 114.5(7) . . ? 
C1 P1 C2 119.2(7) . . ? 
C8 P1 C2 98.8(8) . . ? 
C3 C2 C7 119.6(16) . . ? 
C3 C2 P1 124.0(13) . . ? 
C7 C2 P1 116.4(12) . . ? 
C4 C3 C2 122.5(15) . . ? 
C4 C3 H3 118.7 . . ? 
C2 C3 H3 118.7 . . ? 
C3 C4 C5 119.8(14) . . ? 
C3 C4 H4 120.1 . . ? 
C5 C4 H4 120.1 . . ? 
C6 C5 C4 117.9(16) . . ? 
C6 C5 H5 121.0 . . ? 
C4 C5 H5 121.0 . . ? 
C5 C6 C7 121.1(15) . . ? 
C5 C6 H6 119.5 . . ? 
C7 C6 H6 119.5 . . ? 
C2 C7 C6 118.9(14) . . ? 
C2 C7 H7 120.5 . . ? 
C6 C7 H7 120.5 . . ? 
C13 C8 C9 118.1(15) . . ? 
C13 C8 P1 120.8(13) . . ? 
C9 C8 P1 120.9(11) . . ? 
C8 C9 C10 122.0(14) . . ? 
C8 C9 H9 119.0 . . ? 
C10 C9 H9 119.0 . . ? 
C11 C10 C9 118.2(15) . . ? 
C11 C10 H10 120.9 . . ? 
C9 C10 H10 120.9 . . ? 
C12 C11 C10 120.1(15) . . ? 
C12 C11 H11 119.9 . . ? 
C10 C11 H11 119.9 . . ? 
C11 C12 C13 121.2(14) . . ? 
C11 C12 H12 119.4 . . ? 
C13 C12 H12 119.4 . . ? 
C8 C13 C12 120.3(15) . . ? 
C8 C13 H13 119.9 . . ? 
C12 C13 H13 119.9 . . ? 
C14 N1 P1 125.5(11) . . ? 
C14 N1 Yb1 131.9(10) . . ? 
P1 N1 Yb1 102.1(6) . . ? 
C15 C14 C19 120.4(13) . . ? 
C15 C14 N1 121.1(13) . . ? 
C19 C14 N1 118.3(14) . . ? 
C14 C15 C16 120.0(14) . . ? 
C14 C15 C21 122.8(13) . . ? 
C16 C15 C21 117.1(14) . . ? 
C17 C16 C15 120.4(15) . . ? 
C17 C16 H16 119.8 . . ? 
C15 C16 H16 119.8 . . ? 
C18 C17 C16 118.3(14) . . ? 
C18 C17 C22 121.1(14) . . ? 
C16 C17 C22 120.6(15) . . ? 
C17 C18 C19 124.1(14) . . ? 
C17 C18 H18 118.0 . . ? 
C19 C18 H18 118.0 . . ? 
C14 C19 C18 116.3(14) . . ? 
C14 C19 C20 122.4(13) . . ? 
C18 C19 C20 121.2(13) . . ? 
C19 C20 H20B 109.5 . . ? 
C19 C20 H20C 109.5 . . ? 
H20B C20 H20C 109.5 . . ? 
C19 C20 H20A 109.5 . . ? 
H20B C20 H20A 109.5 . . ? 
H20C C20 H20A 109.5 . . ? 
C15 C21 H21B 109.5 . . ? 
C15 C21 H21C 109.5 . . ? 
H21B C21 H21C 109.5 . . ? 
C15 C21 H21A 109.5 . . ? 
H21B C21 H21A 109.5 . . ? 
H21C C21 H21A 109.5 . . ? 
C17 C22 H22A 109.5 . . ? 
C17 C22 H22B 109.5 . . ? 
H22A C22 H22B 109.5 . . ? 
C17 C22 H22C 109.5 . . ? 
H22A C22 H22C 109.5 . . ? 
H22B C22 H22C 109.5 . . ? 
N2 P2 C1 102.0(7) . . ? 
N2 P2 C23 115.2(7) . . ? 
C1 P2 C23 113.1(8) . . ? 
N2 P2 C29 111.9(7) . . ? 
C1 P2 C29 110.3(7) . . ? 
C23 P2 C29 104.5(7) . . ? 
C24 C23 C28 118.6(15) . . ? 
C24 C23 P2 122.1(12) . . ? 
C28 C23 P2 119.2(12) . . ? 
C25 C24 C23 120.7(16) . . ? 
C25 C24 H24 119.7 . . ? 
C23 C24 H24 119.7 . . ? 
C24 C25 C26 121.8(16) . . ? 
C24 C25 H25 119.1 . . ? 
C26 C25 H25 119.1 . . ? 
C27 C26 C25 117.4(15) . . ? 
C27 C26 H26 121.3 . . ? 
C25 C26 H26 121.3 . . ? 
C28 C27 C26 120.3(16) . . ? 
C28 C27 H27 119.8 . . ? 
C26 C27 H27 119.8 . . ? 
C27 C28 C23 121.2(16) . . ? 
C27 C28 H28 119.4 . . ? 
C23 C28 H28 119.4 . . ? 
C34 C29 C30 119.7(13) . . ? 
C34 C29 P2 120.7(11) . . ? 
C30 C29 P2 119.4(12) . . ? 
C31 C30 C29 121.1(15) . . ? 
C31 C30 H30 119.5 . . ? 
C29 C30 H30 119.5 . . ? 
C30 C31 C32 119.3(14) . . ? 
C30 C31 H31 120.4 . . ? 
C32 C31 H31 120.4 . . ? 
C33 C32 C31 121.7(14) . . ? 
C33 C32 H32 119.2 . . ? 
C31 C32 H32 119.2 . . ? 
C32 C33 C34 118.8(15) . . ? 
C32 C33 H33 120.6 . . ? 
C34 C33 H33 120.6 . . ? 
C29 C34 C33 119.5(14) . . ? 
C29 C34 H34 120.3 . . ? 
C33 C34 H34 120.3 . . ? 
C35 N2 P2 118.4(10) . . ? 
C35 N2 Yb1 139.5(10) . . ? 
P2 N2 Yb1 101.4(6) . . ? 
C36 C35 C40 120.4(14) . . ? 
C36 C35 N2 119.3(13) . . ? 
C40 C35 N2 119.8(13) . . ? 
C35 C36 C37 118.7(14) . . ? 
C35 C36 C42 123.1(13) . . ? 
C37 C36 C42 118.0(13) . . ? 
C38 C37 C36 120.8(14) . . ? 
C38 C37 H37 119.6 . . ? 
C36 C37 H37 119.6 . . ? 
C39 C38 C37 119.0(14) . . ? 
C39 C38 C43 121.9(13) . . ? 
C37 C38 C43 119.1(14) . . ? 
C38 C39 C40 122.0(14) . . ? 
C38 C39 H39 119.0 . . ? 
C40 C39 H39 119.0 . . ? 
C39 C40 C35 118.7(14) . . ? 
C39 C40 C41 118.5(13) . . ? 
C35 C40 C41 122.7(13) . . ? 
C40 C41 H41C 109.5 . . ? 
C40 C41 H41A 109.5 . . ? 
H41C C41 H41A 109.5 . . ? 
C40 C41 H41B 109.5 . . ? 
H41C C41 H41B 109.5 . . ? 
H41A C41 H41B 109.5 . . ? 
C36 C42 H42A 109.5 . . ? 
C36 C42 H42C 109.5 . . ? 
H42A C42 H42C 109.5 . . ? 
C36 C42 H42B 109.5 . . ? 
H42A C42 H42B 109.5 . . ? 
H42C C42 H42B 109.5 . . ? 
C38 C43 H43B 109.5 . . ? 
C38 C43 H43A 109.5 . . ? 
H43B C43 H43A 109.5 . . ? 
C38 C43 H43C 109.5 . . ? 
H43B C43 H43C 109.5 . . ? 
H43A C43 H43C 109.5 . . ? 
C47 O1 C44 110.2(12) . . ? 
C47 O1 Yb1 124.7(9) . . ? 
C44 O1 Yb1 120.1(9) . . ? 
O1 C44 C45 105.3(12) . . ? 
O1 C44 H44B 110.7 . . ? 
C45 C44 H44B 110.7 . . ? 
O1 C44 H44A 110.7 . . ? 
C45 C44 H44A 110.7 . . ? 
H44B C44 H44A 108.8 . . ? 
C44 C45 C46 101.1(13) . . ? 
C44 C45 H45A 111.5 . . ? 
C46 C45 H45A 111.5 . . ? 
C44 C45 H45B 111.5 . . ? 
C46 C45 H45B 111.5 . . ? 
H45A C45 H45B 109.4 . . ? 
C45 C46 C47 103.6(13) . . ? 
C45 C46 H46B 111.0 . . ? 
C47 C46 H46B 111.0 . . ? 
C45 C46 H46A 111.0 . . ? 
C47 C46 H46A 111.0 . . ? 
H46B C46 H46A 109.0 . . ? 
O1 C47 C46 103.6(12) . . ? 
O1 C47 H47A 111.0 . . ? 
C46 C47 H47A 111.0 . . ? 
O1 C47 H47B 111.0 . . ? 
C46 C47 H47B 111.0 . . ? 
H47A C47 H47B 109.0 . . ? 
 
_diffrn_measured_fraction_theta_max    0.967 
_diffrn_reflns_theta_full              27.56 
_diffrn_measured_fraction_theta_full   0.967 
_refine_diff_density_max   10.058 
_refine_diff_density_min   -5.305 
_refine_diff_density_rms    0.416 

#=== End
 
data_5a
 
_nottingham_internal_coll_name         GMSTLE
_nottingham_internal_coll_number       10915
_nottingham_internal_coll_client       GM/STL
_nottingham_internal_coll_type         custom
_nottingham_internal_coll_frame_time   '15.0000 and 60.0000'
_nottingham_internal_coll_frame_width  '1.0000'
_nottingham_internal_coll_frame_method '\w scans'
_nottingham_internal_coll_user         DPM
_nottingham_internal_coll_date         03/01/2012
_nottingham_internal_process_user      DPM
_nottingham_internal_process_date      05/01/2012
_nottingham_internal_solution_user     DPM
_nottingham_internal_solution_date     05/01/2012
_nottingham_internal_refinement_user   DPM
_nottingham_internal_refinement_date   09/01/2012
_nottingham_internal_validation_user   AJB
_nottingham_internal_validation_date   1/10/2013
_nottingham_internal_archive_date      ?
 
_audit_creation_method
;
CrysAlisPro, Oxford Diffraction Ltd.,
Version 1.171.33.52 (release 06-11-2009 CrysAlis171 .NET)
(compiled Nov  6 2009,16:24:50)
;  
_chemical_name_systematic 
; 
 ? 
; 
_chemical_name_common             ? 
_chemical_melting_point           ? 
_chemical_formula_moiety         'C86 H86 Dy N4 P4, C43 H43 N2 P2, 4(C7 H8)' 
_chemical_formula_sum            'C157 H161 Dy N6 P6' 
_chemical_formula_weight          2480.24 
 
loop_ 
 _atom_type_symbol 
 _atom_type_description 
 _atom_type_scat_dispersion_real 
 _atom_type_scat_dispersion_imag 
 _atom_type_scat_source 
 'C'  'C'   0.0181   0.0091 
 'International Tables Vol C Tables 4.2.6.8 and 6.1.1.4' 
 'H'  'H'   0.0000   0.0000 
 'International Tables Vol C Tables 4.2.6.8 and 6.1.1.4' 
 'Dy'  'Dy'  -9.8046   9.8477 
 'International Tables Vol C Tables 4.2.6.8 and 6.1.1.4' 
 'N'  'N'   0.0311   0.0180 
 'International Tables Vol C Tables 4.2.6.8 and 6.1.1.4' 
 'P'  'P'   0.2955   0.4335 
 'International Tables Vol C Tables 4.2.6.8 and 6.1.1.4' 
 
_symmetry_cell_setting            triclinic
_symmetry_space_group_name_H-M    'P -1'
_symmetry_space_group_name_Hall   '-P 1' 
 
loop_ 
 _symmetry_equiv_pos_as_xyz 
 'x, y, z' 
 '-x, -y, -z' 
 
_cell_length_a                    17.2957(11) 
_cell_length_b                    18.9502(15) 
_cell_length_c                    21.6886(15) 
_cell_angle_alpha                 75.525(6) 
_cell_angle_beta                  74.875(6) 
_cell_angle_gamma                 73.945(6) 
_cell_volume                      6472.4(8) 
_cell_formula_units_Z             2 
_cell_measurement_temperature     90(2) 
_cell_measurement_reflns_used     21681
_cell_measurement_theta_min       3.26
_cell_measurement_theta_max       74.98

_exptl_crystal_description        block
_exptl_crystal_colour             colourless 
_exptl_crystal_size_max           0.158
_exptl_crystal_size_mid           0.123
_exptl_crystal_size_min           0.112
_exptl_crystal_density_meas       ? 
_exptl_crystal_density_diffrn     1.273 
_exptl_crystal_density_method     'not measured' 
_exptl_crystal_F_000              2602 
_exptl_absorpt_coefficient_mu     4.210 
_exptl_absorpt_correction_type    'multi-scan'
_exptl_absorpt_correction_T_min   0.365
_exptl_absorpt_correction_T_max   1.000 
_exptl_absorpt_process_details    
;
CrysAlisPro, Agilent Technologies,
Version 1.171.35.19 (release 27-10-2011 CrysAlis171 .NET)
(compiled Oct 27 2011,15:02:11)
Empirical absorption correction using spherical harmonics,
 implemented in SCALE3 ABSPACK scaling algorithm.
; 
 
_exptl_special_details 
; 
 ? 
; 
 
_diffrn_ambient_temperature       90(2)
_diffrn_radiation_wavelength      1.5418
_diffrn_radiation_type            'Cu K\a'
_diffrn_radiation_source          'SuperNova (Cu) X-ray Source'
_diffrn_radiation_monochromator   'mirror'
_diffrn_measurement_device_type   'SuperNova, Single source at offset), Atlas'
_diffrn_measurement_method        '\w scans'
_diffrn_detector_area_resol_mean  10.3613
_diffrn_standards_number          0
_diffrn_standards_interval_count  .
_diffrn_standards_decay_%         0 
_diffrn_reflns_number             55800 
_diffrn_reflns_av_R_equivalents   0.048 
_diffrn_reflns_av_sigmaI/netI     0.061
_diffrn_reflns_limit_h_min       -17 
_diffrn_reflns_limit_h_max        21 
_diffrn_reflns_limit_k_min       -23 
_diffrn_reflns_limit_k_max        21 
_diffrn_reflns_limit_l_min       -27 
_diffrn_reflns_limit_l_max        24 
_diffrn_reflns_theta_min          3.26 
_diffrn_reflns_theta_max          75.44 
_reflns_number_total              25787 
_reflns_number_gt                 22999 
_reflns_threshold_expression      I>2\s(I)

_computing_data_collection
;
CrysAlisPro, Oxford Diffraction Ltd.,
Version 1.171.33.52 (release 06-11-2009 CrysAlis171 .NET)
(compiled Nov  6 2009,16:24:50)
;
_computing_cell_refinement
;
CrysAlisPro, Oxford Diffraction Ltd.,
Version 1.171.33.52 (release 06-11-2009 CrysAlis171 .NET)
(compiled Nov  6 2009,16:24:50)
;
_computing_data_reduction
;
CrysAlisPro, Oxford Diffraction Ltd.,
Version 1.171.33.52 (release 06-11-2009 CrysAlis171 .NET)
(compiled Nov  6 2009,16:24:50)
;
_computing_structure_solution    'SHELXTL (Sheldrick, 2008)' 
_computing_structure_refinement  'SHELXL97 (Sheldrick, 2008)'
_computing_molecular_graphics    'SHELXTL (Sheldrick, 2008)' 
_computing_publication_material  
'enCIFer (Allen et al., 2004); PLATON (Spek, 2009)' 
 
_refine_special_details          ?
 
_refine_ls_structure_factor_coef  Fsqd  
_refine_ls_matrix_type            full 
_refine_ls_weighting_scheme       calc  
_refine_ls_weighting_details 
 'calc w=1/[\s^2^(Fo^2^)+(0.047P)^2^] where P=(Fo^2^+2Fc^2^)/3' 
_atom_sites_solution_primary      direct 
_atom_sites_solution_secondary    difmap 
_atom_sites_solution_hydrogens   'geom, Me from difmap' 
_refine_ls_hydrogen_treatment     constr 
_refine_ls_extinction_method      none 
_refine_ls_extinction_coef        ? 
_refine_ls_number_reflns          25787 
_refine_ls_number_parameters      1553 
_refine_ls_number_restraints      0 
_refine_ls_R_factor_all           0.0461 
_refine_ls_R_factor_gt            0.0387 
_refine_ls_wR_factor_ref          0.0939 
_refine_ls_wR_factor_gt           0.0896 
_refine_ls_goodness_of_fit_ref    1.02 
_refine_ls_restrained_S_all       1.02 
_refine_ls_shift/su_max           0.001 
_refine_ls_shift/su_mean          0.000 
 
loop_ 
 _atom_site_label 
 _atom_site_type_symbol 
 _atom_site_fract_x 
 _atom_site_fract_y 
 _atom_site_fract_z 
 _atom_site_U_iso_or_equiv 
 _atom_site_adp_type 
 _atom_site_occupancy 
 _atom_site_symmetry_multiplicity 
 _atom_site_calc_flag 
 _atom_site_refinement_flags 
 _atom_site_disorder_assembly 
 _atom_site_disorder_group 
Dy1 Dy 0.027641(7) 0.277103(7) 0.283254(6) 0.01226(4) Uani 1 1 d . . . 
P1 P 0.03485(3) 0.42686(3) 0.17849(2) 0.01296(10) Uani 1 1 d . . . 
P2 P 0.13820(3) 0.38313(3) 0.28718(3) 0.01287(10) Uani 1 1 d . . . 
P3 P -0.10038(3) 0.21857(3) 0.40541(2) 0.01246(10) Uani 1 1 d . . . 
P4 P 0.03252(3) 0.10323(3) 0.32867(2) 0.01238(10) Uani 1 1 d . . . 
N1 N 0.03654(11) 0.34200(11) 0.17310(9) 0.0152(4) Uani 1 1 d . . . 
N2 N 0.13895(11) 0.29479(11) 0.31572(9) 0.0146(4) Uani 1 1 d . . . 
N3 N -0.10171(11) 0.29858(11) 0.35443(9) 0.0136(3) Uani 1 1 d . . . 
N4 N 0.04271(11) 0.15806(11) 0.25754(9) 0.0150(4) Uani 1 1 d . . . 
C1 C 0.04737(13) 0.41746(13) 0.25718(10) 0.0153(4) Uani 1 1 d . . . 
H1 H 0.0035 0.4515 0.2832 0.018 Uiso 1 1 calc R . . 
C2 C 0.10777(13) 0.47261(13) 0.11721(11) 0.0156(4) Uani 1 1 d . . . 
C3 C 0.13243(14) 0.52857(13) 0.13366(11) 0.0176(4) Uani 1 1 d . . . 
H3 H 0.1118 0.5401 0.1759 0.021 Uiso 1 1 calc R . . 
C4 C 0.18676(14) 0.56730(14) 0.08876(12) 0.0212(5) Uani 1 1 d . . . 
H4 H 0.2036 0.6052 0.1002 0.025 Uiso 1 1 calc R . . 
C5 C 0.21644(14) 0.55048(15) 0.02714(12) 0.0227(5) Uani 1 1 d . . . 
H5 H 0.2546 0.5762 -0.0035 0.027 Uiso 1 1 calc R . . 
C6 C 0.19092(14) 0.49648(14) 0.00987(11) 0.0195(5) Uani 1 1 d . . . 
H6 H 0.2108 0.4860 -0.0328 0.023 Uiso 1 1 calc R . . 
C7 C 0.13634(13) 0.45751(14) 0.05456(11) 0.0169(4) Uani 1 1 d . . . 
H7 H 0.1186 0.4207 0.0425 0.020 Uiso 1 1 calc R . . 
C8 C -0.06158(13) 0.49522(13) 0.17009(11) 0.0155(4) Uani 1 1 d . . . 
C9 C -0.06976(14) 0.54377(14) 0.11111(11) 0.0175(4) Uani 1 1 d . . . 
H9 H -0.0239 0.5437 0.0757 0.021 Uiso 1 1 calc R . . 
C10 C -0.14479(15) 0.59232(14) 0.10383(12) 0.0211(5) Uani 1 1 d . . . 
H10 H -0.1499 0.6251 0.0634 0.025 Uiso 1 1 calc R . . 
C11 C -0.21186(15) 0.59326(15) 0.15489(13) 0.0234(5) Uani 1 1 d . . . 
H11 H -0.2632 0.6262 0.1495 0.028 Uiso 1 1 calc R . . 
C12 C -0.20405(15) 0.54598(15) 0.21406(12) 0.0242(5) Uani 1 1 d . . . 
H12 H -0.2499 0.5470 0.2496 0.029 Uiso 1 1 calc R . . 
C13 C -0.12917(14) 0.49691(14) 0.22165(11) 0.0203(5) Uani 1 1 d . . . 
H13 H -0.1242 0.4644 0.2623 0.024 Uiso 1 1 calc R . . 
C14 C 0.23126(13) 0.39957(13) 0.22874(11) 0.0159(4) Uani 1 1 d . . . 
C15 C 0.27258(14) 0.45189(14) 0.23175(11) 0.0198(5) Uani 1 1 d . . . 
H15 H 0.2528 0.4794 0.2660 0.024 Uiso 1 1 calc R . . 
C16 C 0.34180(15) 0.46423(16) 0.18555(13) 0.0252(5) Uani 1 1 d . . . 
H16 H 0.3695 0.4998 0.1884 0.030 Uiso 1 1 calc R . . 
C17 C 0.37116(14) 0.42479(16) 0.13494(12) 0.0248(5) Uani 1 1 d . . . 
H17 H 0.4195 0.4326 0.1037 0.030 Uiso 1 1 calc R . . 
C18 C 0.32963(15) 0.37385(15) 0.13005(12) 0.0223(5) Uani 1 1 d . . . 
H18 H 0.3486 0.3477 0.0949 0.027 Uiso 1 1 calc R . . 
C19 C 0.26041(14) 0.36163(14) 0.17678(11) 0.0189(5) Uani 1 1 d . . . 
H19 H 0.2322 0.3267 0.1734 0.023 Uiso 1 1 calc R . . 
C20 C 0.13596(13) 0.43549(14) 0.34774(10) 0.0164(4) Uani 1 1 d . . . 
C21 C 0.19628(14) 0.40753(14) 0.38541(11) 0.0190(5) Uani 1 1 d . . . 
H21 H 0.2326 0.3602 0.3820 0.023 Uiso 1 1 calc R . . 
C22 C 0.20350(16) 0.44828(16) 0.42754(11) 0.0244(5) Uani 1 1 d . . . 
H22 H 0.2437 0.4284 0.4537 0.029 Uiso 1 1 calc R . . 
C23 C 0.15209(17) 0.51803(17) 0.43143(12) 0.0276(6) Uani 1 1 d . . . 
H23 H 0.1579 0.5466 0.4595 0.033 Uiso 1 1 calc R . . 
C24 C 0.09216(17) 0.54628(16) 0.39451(14) 0.0303(6) Uani 1 1 d . . . 
H24 H 0.0565 0.5940 0.3977 0.036 Uiso 1 1 calc R . . 
C25 C 0.08391(15) 0.50498(14) 0.35265(12) 0.0217(5) Uani 1 1 d . . . 
H25 H 0.0426 0.5245 0.3275 0.026 Uiso 1 1 calc R . . 
C26 C 0.03373(14) 0.32130(13) 0.11404(10) 0.0158(4) Uani 1 1 d . . . 
C27 C -0.04042(14) 0.33531(13) 0.09346(11) 0.0176(4) Uani 1 1 d . . . 
C28 C -0.03939(15) 0.31402(14) 0.03578(12) 0.0213(5) Uani 1 1 d . . . 
H28 H -0.0895 0.3248 0.0213 0.026 Uiso 1 1 calc R . . 
C29 C 0.03191(16) 0.27791(15) -0.00078(11) 0.0230(5) Uani 1 1 d . . . 
C30 C 0.10371(15) 0.26116(14) 0.02202(11) 0.0203(5) Uani 1 1 d . . . 
H30 H 0.1528 0.2348 -0.0017 0.024 Uiso 1 1 calc R . . 
C31 C 0.10641(14) 0.28172(13) 0.07875(11) 0.0175(4) Uani 1 1 d . . . 
C32 C -0.12224(14) 0.36961(14) 0.13165(12) 0.0214(5) Uani 1 1 d . . . 
H32A H -0.1196 0.3602 0.1777 0.032 Uiso 1 1 calc R . . 
H32B H -0.1648 0.3473 0.1271 0.032 Uiso 1 1 calc R . . 
H32C H -0.1357 0.4237 0.1151 0.032 Uiso 1 1 calc R . . 
C33 C 0.03217(19) 0.25630(18) -0.06338(13) 0.0334(6) Uani 1 1 d . . . 
H33A H 0.0739 0.2761 -0.0984 0.050 Uiso 1 1 calc R . . 
H33B H -0.0221 0.2771 -0.0746 0.050 Uiso 1 1 calc R . . 
H33C H 0.0449 0.2017 -0.0577 0.050 Uiso 1 1 calc R . . 
C34 C 0.18758(14) 0.26323(14) 0.09859(12) 0.0200(5) Uani 1 1 d . . . 
H34A H 0.2248 0.2220 0.0785 0.030 Uiso 1 1 calc R . . 
H34B H 0.1795 0.2483 0.1461 0.030 Uiso 1 1 calc R . . 
H34C H 0.2116 0.3073 0.0842 0.030 Uiso 1 1 calc R . . 
C35 C 0.18900(13) 0.24815(13) 0.36088(11) 0.0163(4) Uani 1 1 d . . . 
C36 C 0.15566(14) 0.24242(13) 0.42829(11) 0.0172(4) Uani 1 1 d . . . 
C37 C 0.20140(15) 0.19561(14) 0.47324(11) 0.0191(5) Uani 1 1 d . . . 
H37 H 0.1781 0.1925 0.5184 0.023 Uiso 1 1 calc R . . 
C38 C 0.27962(15) 0.15369(15) 0.45410(12) 0.0227(5) Uani 1 1 d . . . 
C39 C 0.31142(14) 0.15903(14) 0.38761(12) 0.0214(5) Uani 1 1 d . . . 
H39 H 0.3649 0.1303 0.3736 0.026 Uiso 1 1 calc R . . 
C40 C 0.26818(14) 0.20475(14) 0.34068(12) 0.0186(4) Uani 1 1 d . . . 
C41 C 0.07157(14) 0.28643(14) 0.45381(11) 0.0189(4) Uani 1 1 d . . . 
H41A H 0.0546 0.2669 0.5003 0.028 Uiso 1 1 calc R . . 
H41B H 0.0323 0.2820 0.4304 0.028 Uiso 1 1 calc R . . 
H41C H 0.0729 0.3392 0.4474 0.028 Uiso 1 1 calc R . . 
C42 C 0.32835(17) 0.10314(17) 0.50331(14) 0.0308(6) Uani 1 1 d . . . 
H42A H 0.3295 0.1315 0.5351 0.046 Uiso 1 1 calc R . . 
H42B H 0.3847 0.0840 0.4810 0.046 Uiso 1 1 calc R . . 
H42C H 0.3025 0.0611 0.5258 0.046 Uiso 1 1 calc R . . 
C43 C 0.30813(14) 0.20366(15) 0.27035(12) 0.0228(5) Uani 1 1 d . . . 
H43A H 0.3435 0.2396 0.2547 0.034 Uiso 1 1 calc R . . 
H43B H 0.2656 0.2172 0.2445 0.034 Uiso 1 1 calc R . . 
H43C H 0.3414 0.1534 0.2661 0.034 Uiso 1 1 calc R . . 
C44 C -0.00175(12) 0.16455(13) 0.38258(11) 0.0150(4) Uani 1 1 d . . . 
H44 H 0.0333 0.1542 0.4153 0.018 Uiso 1 1 calc R . . 
C45 C -0.18276(13) 0.17562(13) 0.40606(11) 0.0170(4) Uani 1 1 d . . . 
C46 C -0.18654(14) 0.15793(14) 0.34840(12) 0.0186(4) Uani 1 1 d . . . 
H46 H -0.1489 0.1718 0.3095 0.022 Uiso 1 1 calc R . . 
C47 C -0.24418(15) 0.12056(15) 0.34687(13) 0.0248(5) Uani 1 1 d . . . 
H47 H -0.2457 0.1084 0.3073 0.030 Uiso 1 1 calc R . . 
C48 C -0.29971(15) 0.10103(16) 0.40343(14) 0.0274(5) Uani 1 1 d . . . 
H48 H -0.3399 0.0759 0.4026 0.033 Uiso 1 1 calc R . . 
C49 C -0.29678(15) 0.11807(16) 0.46104(14) 0.0278(6) Uani 1 1 d . . . 
H49 H -0.3351 0.1046 0.4997 0.033 Uiso 1 1 calc R . . 
C50 C -0.23798(14) 0.15491(15) 0.46299(12) 0.0222(5) Uani 1 1 d . . . 
H50 H -0.2357 0.1658 0.5029 0.027 Uiso 1 1 calc R . . 
C51 C -0.11541(13) 0.22476(13) 0.49018(10) 0.0151(4) Uani 1 1 d . . . 
C52 C -0.18243(14) 0.27822(14) 0.51544(11) 0.0184(4) Uani 1 1 d . . . 
H52 H -0.2184 0.3100 0.4884 0.022 Uiso 1 1 calc R . . 
C53 C -0.19623(15) 0.28478(14) 0.57995(12) 0.0209(5) Uani 1 1 d . . . 
H53 H -0.2412 0.3215 0.5968 0.025 Uiso 1 1 calc R . . 
C54 C -0.14447(15) 0.23779(15) 0.61996(12) 0.0227(5) Uani 1 1 d . . . 
H54 H -0.1538 0.2427 0.6640 0.027 Uiso 1 1 calc R . . 
C55 C -0.07911(14) 0.18366(15) 0.59580(11) 0.0219(5) Uani 1 1 d . . . 
H55 H -0.0441 0.1511 0.6233 0.026 Uiso 1 1 calc R . . 
C56 C -0.06515(13) 0.17729(14) 0.53114(11) 0.0172(4) Uani 1 1 d . . . 
H56 H -0.0206 0.1399 0.5148 0.021 Uiso 1 1 calc R . . 
C57 C 0.12689(13) 0.03876(13) 0.34756(11) 0.0161(4) Uani 1 1 d . . . 
C58 C 0.17566(14) 0.05520(14) 0.38147(12) 0.0187(4) Uani 1 1 d . . . 
H58 H 0.1585 0.1001 0.3983 0.022 Uiso 1 1 calc R . . 
C59 C 0.24951(15) 0.00571(15) 0.39068(13) 0.0250(5) Uani 1 1 d . . . 
H59 H 0.2823 0.0162 0.4147 0.030 Uiso 1 1 calc R . . 
C60 C 0.27568(14) -0.05901(14) 0.36501(13) 0.0235(5) Uani 1 1 d . . . 
H60 H 0.3268 -0.0921 0.3708 0.028 Uiso 1 1 calc R . . 
C61 C 0.22758(14) -0.07557(14) 0.33094(12) 0.0211(5) Uani 1 1 d . . . 
H61 H 0.2457 -0.1198 0.3132 0.025 Uiso 1 1 calc R . . 
C62 C 0.15303(14) -0.02737(13) 0.32287(11) 0.0183(4) Uani 1 1 d . . . 
H62 H 0.1194 -0.0393 0.3004 0.022 Uiso 1 1 calc R . . 
C63 C -0.03095(13) 0.03638(13) 0.34103(11) 0.0158(4) Uani 1 1 d . . . 
C64 C -0.04075(14) 0.00746(13) 0.29081(11) 0.0172(4) Uani 1 1 d . . . 
H64 H -0.0144 0.0235 0.2472 0.021 Uiso 1 1 calc R . . 
C65 C -0.08873(14) -0.04450(14) 0.30441(12) 0.0192(5) Uani 1 1 d . . . 
H65 H -0.0952 -0.0640 0.2702 0.023 Uiso 1 1 calc R . . 
C66 C -0.12726(14) -0.06801(14) 0.36793(12) 0.0206(5) Uani 1 1 d . . . 
H66 H -0.1612 -0.1027 0.3771 0.025 Uiso 1 1 calc R . . 
C67 C -0.11629(14) -0.04089(13) 0.41852(11) 0.0184(4) Uani 1 1 d . . . 
H67 H -0.1420 -0.0577 0.4621 0.022 Uiso 1 1 calc R . . 
C68 C -0.06801(13) 0.01050(13) 0.40517(11) 0.0163(4) Uani 1 1 d . . . 
H68 H -0.0600 0.0283 0.4398 0.020 Uiso 1 1 calc R . . 
C69 C -0.16984(13) 0.36216(13) 0.36248(10) 0.0149(4) Uani 1 1 d . . . 
C70 C -0.16516(14) 0.41685(14) 0.39440(11) 0.0190(5) Uani 1 1 d . . . 
C71 C -0.23174(15) 0.47692(14) 0.40391(12) 0.0222(5) Uani 1 1 d . . . 
H71 H -0.2281 0.5130 0.4259 0.027 Uiso 1 1 calc R . . 
C72 C -0.30364(15) 0.48606(15) 0.38225(13) 0.0261(5) Uani 1 1 d . . . 
C73 C -0.30540(14) 0.43470(15) 0.34764(12) 0.0231(5) Uani 1 1 d . . . 
H73 H -0.3530 0.4410 0.3310 0.028 Uiso 1 1 calc R . . 
C74 C -0.23974(14) 0.37380(14) 0.33612(11) 0.0185(5) Uani 1 1 d . . . 
C75 C -0.08935(14) 0.41304(14) 0.41750(11) 0.0204(5) Uani 1 1 d . . . 
H75A H -0.0876 0.3767 0.4585 0.031 Uiso 1 1 calc R . . 
H75B H -0.0903 0.4624 0.4245 0.031 Uiso 1 1 calc R . . 
H75C H -0.0406 0.3974 0.3847 0.031 Uiso 1 1 calc R . . 
C76 C -0.37486(18) 0.55220(18) 0.39261(17) 0.0397(7) Uani 1 1 d . . . 
H76A H -0.3921 0.5763 0.3513 0.060 Uiso 1 1 calc R . . 
H76B H -0.3578 0.5882 0.4088 0.060 Uiso 1 1 calc R . . 
H76C H -0.4209 0.5351 0.4245 0.060 Uiso 1 1 calc R . . 
C77 C -0.24537(14) 0.32655(14) 0.29186(12) 0.0219(5) Uani 1 1 d . . . 
H77A H -0.1904 0.2973 0.2761 0.033 Uiso 1 1 calc R . . 
H77B H -0.2678 0.3590 0.2547 0.033 Uiso 1 1 calc R . . 
H77C H -0.2815 0.2926 0.3158 0.033 Uiso 1 1 calc R . . 
C78 C 0.06959(13) 0.12918(13) 0.19776(10) 0.0153(4) Uani 1 1 d . . . 
C79 C 0.15309(14) 0.09785(13) 0.17499(11) 0.0175(4) Uani 1 1 d . . . 
C80 C 0.17561(15) 0.06802(14) 0.11841(12) 0.0212(5) Uani 1 1 d . . . 
H80 H 0.2317 0.0453 0.1040 0.025 Uiso 1 1 calc R . . 
C81 C 0.11896(15) 0.07041(14) 0.08268(11) 0.0215(5) Uani 1 1 d . . . 
C82 C 0.03741(15) 0.10541(14) 0.10384(11) 0.0206(5) Uani 1 1 d . . . 
H82 H -0.0019 0.1090 0.0791 0.025 Uiso 1 1 calc R . . 
C83 C 0.01196(14) 0.13525(13) 0.16007(11) 0.0166(4) Uani 1 1 d . . . 
C84 C 0.22119(14) 0.09837(15) 0.20653(12) 0.0213(5) Uani 1 1 d . . . 
H84A H 0.2455 0.0470 0.2258 0.032 Uiso 1 1 calc R . . 
H84B H 0.1987 0.1285 0.2406 0.032 Uiso 1 1 calc R . . 
H84C H 0.2636 0.1199 0.1736 0.032 Uiso 1 1 calc R . . 
C85 C 0.14620(18) 0.03822(18) 0.02127(13) 0.0310(6) Uani 1 1 d . . . 
H85A H 0.0982 0.0311 0.0095 0.046 Uiso 1 1 calc R . . 
H85B H 0.1852 -0.0101 0.0287 0.046 Uiso 1 1 calc R . . 
H85C H 0.1728 0.0727 -0.0142 0.046 Uiso 1 1 calc R . . 
C86 C -0.07734(14) 0.17208(14) 0.17973(12) 0.0200(5) Uani 1 1 d . . . 
H86A H -0.1024 0.1888 0.1414 0.030 Uiso 1 1 calc R . . 
H86B H -0.0820 0.2153 0.1987 0.030 Uiso 1 1 calc R . . 
H86C H -0.1058 0.1362 0.2119 0.030 Uiso 1 1 calc R . . 
P5 P 0.33541(3) 0.78972(3) 0.15405(3) 0.01573(11) Uani 1 1 d . . . 
P6 P 0.49836(3) 0.69752(3) 0.08001(3) 0.01646(11) Uani 1 1 d . . . 
N5 N 0.32132(12) 0.78034(12) 0.23115(10) 0.0197(4) Uani 1 1 d . . . 
N6 N 0.52697(12) 0.70194(12) 0.00373(10) 0.0202(4) Uani 1 1 d . . . 
C87 C 0.39576(13) 0.72055(14) 0.11366(12) 0.0193(5) Uani 1 1 d . . . 
H87 H 0.3659 0.6878 0.1088 0.023 Uiso 1 1 calc R . . 
C88 C 0.36857(13) 0.87675(14) 0.11858(12) 0.0204(5) Uani 1 1 d . . . 
C89 C 0.38245(15) 0.91923(15) 0.15683(13) 0.0245(5) Uani 1 1 d . . . 
H89 H 0.3767 0.9019 0.2025 0.029 Uiso 1 1 calc R . . 
C90 C 0.40476(15) 0.98685(15) 0.12822(14) 0.0276(6) Uani 1 1 d . . . 
H90 H 0.4155 1.0152 0.1542 0.033 Uiso 1 1 calc R . . 
C91 C 0.41137(15) 1.01286(16) 0.06235(15) 0.0297(6) Uani 1 1 d . . . 
H91 H 0.4259 1.0595 0.0432 0.036 Uiso 1 1 calc R . . 
C92 C 0.39696(16) 0.97155(16) 0.02351(14) 0.0293(6) Uani 1 1 d . . . 
H92 H 0.4012 0.9900 -0.0219 0.035 Uiso 1 1 calc R . . 
C93 C 0.37613(15) 0.90280(15) 0.05176(13) 0.0239(5) Uani 1 1 d . . . 
H93 H 0.3671 0.8738 0.0254 0.029 Uiso 1 1 calc R . . 
C94 C 0.23584(14) 0.81527(14) 0.12874(12) 0.0192(5) Uani 1 1 d . . . 
C95 C 0.22671(15) 0.79733(15) 0.07299(13) 0.0244(5) Uani 1 1 d . . . 
H95 H 0.2723 0.7689 0.0476 0.029 Uiso 1 1 calc R . . 
C96 C 0.16828(15) 0.85728(15) 0.16534(13) 0.0234(5) Uani 1 1 d . . . 
H96 H 0.1738 0.8697 0.2035 0.028 Uiso 1 1 calc R . . 
C97 C 0.09303(15) 0.88102(16) 0.14647(15) 0.0310(6) Uani 1 1 d . . . 
H97 H 0.0474 0.9098 0.1716 0.037 Uiso 1 1 calc R . . 
C98 C 0.08432(16) 0.86285(17) 0.09093(16) 0.0344(6) Uani 1 1 d . . . 
H98 H 0.0328 0.8791 0.0780 0.041 Uiso 1 1 calc R . . 
C99 C 0.15083(17) 0.82097(17) 0.05435(15) 0.0322(6) Uani 1 1 d . . . 
H99 H 0.1448 0.8083 0.0164 0.039 Uiso 1 1 calc R . . 
C100 C 0.33809(13) 0.71241(14) 0.27355(11) 0.0173(4) Uani 1 1 d . . . 
C101 C 0.39013(14) 0.70376(14) 0.31733(11) 0.0199(5) Uani 1 1 d . . . 
C102 C 0.40930(14) 0.63686(15) 0.36035(12) 0.0216(5) Uani 1 1 d . . . 
H102 H 0.4446 0.6329 0.3886 0.026 Uiso 1 1 calc R . . 
C103 C 0.37841(14) 0.57544(15) 0.36335(12) 0.0222(5) Uani 1 1 d . . . 
C104 C 0.32509(14) 0.58427(14) 0.32230(11) 0.0204(5) Uani 1 1 d . . . 
H104 H 0.3024 0.5433 0.3241 0.024 Uiso 1 1 calc R . . 
C105 C 0.30359(13) 0.65074(14) 0.27870(11) 0.0180(4) Uani 1 1 d . . . 
C106 C 0.42326(15) 0.76809(15) 0.31977(13) 0.0246(5) Uani 1 1 d . . . 
H10A H 0.4281 0.8015 0.2771 0.037 Uiso 1 1 calc R . . 
H10B H 0.4775 0.7490 0.3311 0.037 Uiso 1 1 calc R . . 
H10C H 0.3858 0.7957 0.3527 0.037 Uiso 1 1 calc R . . 
C107 C 0.39922(18) 0.50396(16) 0.41131(14) 0.0314(6) Uani 1 1 d . . . 
H10D H 0.4571 0.4938 0.4138 0.047 Uiso 1 1 calc R . . 
H10E H 0.3897 0.4625 0.3970 0.047 Uiso 1 1 calc R . . 
H10F H 0.3644 0.5090 0.4543 0.047 Uiso 1 1 calc R . . 
C108 C 0.24061(15) 0.65618(15) 0.23994(12) 0.0214(5) Uani 1 1 d . . . 
H10G H 0.2077 0.7076 0.2331 0.032 Uiso 1 1 calc R . . 
H10H H 0.2045 0.6221 0.2638 0.032 Uiso 1 1 calc R . . 
H10I H 0.2686 0.6423 0.1977 0.032 Uiso 1 1 calc R . . 
C109 C 0.55650(14) 0.75039(14) 0.10321(13) 0.0219(5) Uani 1 1 d . . . 
C110 C 0.60972(16) 0.78801(16) 0.05537(14) 0.0276(5) Uani 1 1 d . . . 
H110 H 0.6140 0.7876 0.0109 0.033 Uiso 1 1 calc R . . 
C111 C 0.65682(17) 0.82634(17) 0.07221(15) 0.0330(6) Uani 1 1 d . . . 
H111 H 0.6926 0.8524 0.0391 0.040 Uiso 1 1 calc R . . 
C112 C 0.65179(17) 0.82678(19) 0.13690(17) 0.0367(7) Uani 1 1 d . . . 
H112 H 0.6838 0.8532 0.1482 0.044 Uiso 1 1 calc R . . 
C113 C 0.59968(18) 0.7885(2) 0.18497(15) 0.0362(7) Uani 1 1 d . . . 
H113 H 0.5962 0.7884 0.2294 0.043 Uiso 1 1 calc R . . 
C114 C 0.55231(16) 0.74996(18) 0.16866(14) 0.0301(6) Uani 1 1 d . . . 
H114 H 0.5171 0.7234 0.2019 0.036 Uiso 1 1 calc R . . 
C115 C 0.53869(13) 0.60316(14) 0.12320(12) 0.0181(4) Uani 1 1 d . . . 
C116 C 0.50025(15) 0.57672(15) 0.18608(12) 0.0234(5) Uani 1 1 d . . . 
H116 H 0.4527 0.6079 0.2070 0.028 Uiso 1 1 calc R . . 
C117 C 0.53011(16) 0.50532(16) 0.21898(12) 0.0258(5) Uani 1 1 d . . . 
H117 H 0.5025 0.4876 0.2617 0.031 Uiso 1 1 calc R . . 
C118 C 0.60005(15) 0.46038(15) 0.18921(12) 0.0238(5) Uani 1 1 d . . . 
H118 H 0.6204 0.4112 0.2111 0.029 Uiso 1 1 calc R . . 
C119 C 0.64049(14) 0.48730(15) 0.12705(13) 0.0234(5) Uani 1 1 d . . . 
H119 H 0.6896 0.4569 0.1072 0.028 Uiso 1 1 calc R . . 
C120 C 0.61013(14) 0.55763(14) 0.09384(12) 0.0200(5) Uani 1 1 d . . . 
H120 H 0.6378 0.5751 0.0510 0.024 Uiso 1 1 calc R . . 
C121 C 0.47575(14) 0.71451(14) -0.03954(11) 0.0189(5) Uani 1 1 d . . . 
C122 C 0.47549(16) 0.77730(15) -0.09121(12) 0.0245(5) Uani 1 1 d . . . 
C123 C 0.42606(17) 0.79139(16) -0.13616(13) 0.0283(5) Uani 1 1 d . . . 
H123 H 0.4265 0.8347 -0.1696 0.034 Uiso 1 1 calc R . . 
C124 C 0.37598(16) 0.74436(16) -0.13394(13) 0.0268(5) Uani 1 1 d . . . 
C125 C 0.37765(15) 0.68193(15) -0.08442(12) 0.0239(5) Uani 1 1 d . . . 
H125 H 0.3441 0.6488 -0.0818 0.029 Uiso 1 1 calc R . . 
C126 C 0.42630(14) 0.66536(14) -0.03820(12) 0.0202(5) Uani 1 1 d . . . 
C127 C 0.52867(19) 0.82956(17) -0.09593(14) 0.0338(6) Uani 1 1 d . . . 
H12A H 0.5113 0.8518 -0.0569 0.051 Uiso 1 1 calc R . . 
H12B H 0.5234 0.8693 -0.1345 0.051 Uiso 1 1 calc R . . 
H12C H 0.5861 0.8018 -0.0995 0.051 Uiso 1 1 calc R . . 
C128 C 0.32433(19) 0.75899(18) -0.18423(15) 0.0353(6) Uani 1 1 d . . . 
H12D H 0.3591 0.7426 -0.2240 0.053 Uiso 1 1 calc R . . 
H12E H 0.2997 0.8126 -0.1942 0.053 Uiso 1 1 calc R . . 
H12F H 0.2807 0.7312 -0.1671 0.053 Uiso 1 1 calc R . . 
C129 C 0.42831(16) 0.59347(15) 0.01069(12) 0.0247(5) Uani 1 1 d . . . 
H12G H 0.4838 0.5735 0.0196 0.037 Uiso 1 1 calc R . . 
H12H H 0.4135 0.5572 -0.0067 0.037 Uiso 1 1 calc R . . 
H12I H 0.3890 0.6028 0.0511 0.037 Uiso 1 1 calc R . . 
C130 C 0.2015(3) -0.0568(3) 0.8825(2) 0.0612(11) Uani 1 1 d . . . 
H13A H 0.1918 -0.0945 0.8635 0.092 Uiso 1 1 calc R . . 
H13B H 0.1544 -0.0428 0.9172 0.092 Uiso 1 1 calc R . . 
H13C H 0.2513 -0.0773 0.9006 0.092 Uiso 1 1 calc R . . 
C131 C 0.21245(19) 0.0112(2) 0.83079(16) 0.0398(7) Uani 1 1 d . . . 
C132 C 0.1615(2) 0.0818(2) 0.83566(17) 0.0473(9) Uani 1 1 d . . . 
H132 H 0.1177 0.0874 0.8724 0.057 Uiso 1 1 calc R . . 
C133 C 0.1738(2) 0.1440(2) 0.7877(2) 0.0510(9) Uani 1 1 d . . . 
H133 H 0.1394 0.1918 0.7924 0.061 Uiso 1 1 calc R . . 
C134 C 0.2354(2) 0.1367(2) 0.7335(2) 0.0483(8) Uani 1 1 d . . . 
H134 H 0.2436 0.1792 0.7005 0.058 Uiso 1 1 calc R . . 
C135 C 0.28534(19) 0.0669(2) 0.72768(18) 0.0447(8) Uani 1 1 d . . . 
H135 H 0.3278 0.0613 0.6901 0.054 Uiso 1 1 calc R . . 
C136 C 0.27429(19) 0.0056(2) 0.77543(18) 0.0414(7) Uani 1 1 d . . . 
H136 H 0.3097 -0.0418 0.7706 0.050 Uiso 1 1 calc R . . 
C137 C 0.52998(17) 0.13097(18) 0.32306(16) 0.0347(6) Uani 1 1 d . . . 
H13D H 0.5142 0.1497 0.3639 0.052 Uiso 1 1 calc R . . 
H13E H 0.4955 0.1631 0.2928 0.052 Uiso 1 1 calc R . . 
H13F H 0.5878 0.1313 0.3037 0.052 Uiso 1 1 calc R . . 
C138 C 0.51841(15) 0.05278(17) 0.33652(15) 0.0298(6) Uani 1 1 d . . . 
C139 C 0.51950(15) 0.00766(17) 0.39757(14) 0.0307(6) Uani 1 1 d . . . 
H139 H 0.5272 0.0268 0.4315 0.037 Uiso 1 1 calc R . . 
C140 C 0.50954(16) -0.06507(19) 0.40960(16) 0.0355(7) Uani 1 1 d . . . 
H140 H 0.5105 -0.0955 0.4516 0.043 Uiso 1 1 calc R . . 
C141 C 0.49814(18) -0.09332(19) 0.36045(17) 0.0390(7) Uani 1 1 d . . . 
H141 H 0.4919 -0.1433 0.3686 0.047 Uiso 1 1 calc R . . 
C142 C 0.49578(18) -0.04857(19) 0.29930(17) 0.0383(7) Uani 1 1 d . . . 
H142 H 0.4878 -0.0677 0.2655 0.046 Uiso 1 1 calc R . . 
C143 C 0.50503(16) 0.02322(18) 0.28809(15) 0.0340(6) Uani 1 1 d . . . 
H143 H 0.5023 0.0539 0.2464 0.041 Uiso 1 1 calc R . . 
C144 C 0.8242(3) 0.6745(3) 0.40800(18) 0.0622(12) Uani 1 1 d . . . 
H14A H 0.8497 0.6449 0.4445 0.093 Uiso 1 1 calc R . . 
H14B H 0.7847 0.6495 0.4022 0.093 Uiso 1 1 calc R . . 
H14C H 0.7956 0.7244 0.4171 0.093 Uiso 1 1 calc R . . 
C145 C 0.8897(2) 0.68178(17) 0.34684(14) 0.0341(6) Uani 1 1 d . . . 
C146 C 0.94491(18) 0.72645(17) 0.33810(13) 0.0302(6) Uani 1 1 d . . . 
H146 H 0.9420 0.7520 0.3714 0.036 Uiso 1 1 calc R . . 
C147 C 1.00391(17) 0.73404(18) 0.28155(14) 0.0317(6) Uani 1 1 d . . . 
H147 H 1.0409 0.7650 0.2762 0.038 Uiso 1 1 calc R . . 
C148 C 1.00945(18) 0.69673(18) 0.23249(14) 0.0335(6) Uani 1 1 d . . . 
H148 H 1.0504 0.7016 0.1937 0.040 Uiso 1 1 calc R . . 
C149 C 0.95492(19) 0.65250(17) 0.24061(14) 0.0324(6) Uani 1 1 d . . . 
H149 H 0.9583 0.6269 0.2072 0.039 Uiso 1 1 calc R . . 
C150 C 0.8954(2) 0.64510(16) 0.29696(15) 0.0336(6) Uani 1 1 d . . . 
H150 H 0.8580 0.6147 0.3018 0.040 Uiso 1 1 calc R . . 
C151 C 0.5725(2) 0.6725(2) 0.67821(18) 0.0460(8) Uani 1 1 d . . . 
H15A H 0.5985 0.6190 0.6873 0.069 Uiso 1 1 calc R . . 
H15B H 0.5260 0.6844 0.7139 0.069 Uiso 1 1 calc R . . 
H15C H 0.6127 0.7019 0.6742 0.069 Uiso 1 1 calc R . . 
C152 C 0.54238(18) 0.69100(17) 0.61571(16) 0.0346(6) Uani 1 1 d . . . 
C153 C 0.59238(18) 0.71358(17) 0.55702(17) 0.0376(7) Uani 1 1 d . . . 
H153 H 0.6452 0.7199 0.5564 0.045 Uiso 1 1 calc R . . 
C154 C 0.5664(2) 0.7271(2) 0.49924(19) 0.0488(8) Uani 1 1 d . . . 
H154 H 0.6013 0.7426 0.4591 0.059 Uiso 1 1 calc R . . 
C155 C 0.4883(3) 0.7180(2) 0.4999(2) 0.0524(9) Uani 1 1 d . . . 
H155 H 0.4698 0.7269 0.4605 0.063 Uiso 1 1 calc R . . 
C156 C 0.4393(2) 0.6960(2) 0.5586(2) 0.0498(9) Uani 1 1 d . . . 
H156 H 0.3863 0.6897 0.5597 0.060 Uiso 1 1 calc R . . 
C157 C 0.46545(18) 0.68301(18) 0.61543(17) 0.0378(7) Uani 1 1 d . . . 
H157 H 0.4302 0.6682 0.6555 0.045 Uiso 1 1 calc R . . 
 
loop_ 
 _atom_site_aniso_label 
 _atom_site_aniso_U_11 
 _atom_site_aniso_U_22 
 _atom_site_aniso_U_33 
 _atom_site_aniso_U_23 
 _atom_site_aniso_U_13 
 _atom_site_aniso_U_12 
Dy1 0.01504(6) 0.01129(7) 0.01082(6) -0.00480(5) -0.00157(4) -0.00217(5) 
P1 0.0170(2) 0.0119(3) 0.0101(2) -0.0038(2) -0.00232(18) -0.0024(2) 
P2 0.0166(2) 0.0115(3) 0.0119(2) -0.0053(2) -0.00268(19) -0.0028(2) 
P3 0.0139(2) 0.0118(3) 0.0112(2) -0.0045(2) -0.00126(18) -0.00128(19) 
P4 0.0151(2) 0.0108(3) 0.0120(2) -0.0053(2) -0.00258(18) -0.00165(19) 
N1 0.0195(8) 0.0130(9) 0.0141(8) -0.0052(7) -0.0034(7) -0.0032(7) 
N2 0.0173(8) 0.0142(9) 0.0145(8) -0.0042(7) -0.0054(7) -0.0035(7) 
N3 0.0153(8) 0.0124(9) 0.0120(8) -0.0029(7) -0.0010(6) -0.0024(7) 
N4 0.0179(8) 0.0136(9) 0.0139(8) -0.0069(7) -0.0033(7) -0.0005(7) 
C1 0.0168(9) 0.0169(11) 0.0128(10) -0.0074(9) -0.0029(8) -0.0008(8) 
C2 0.0160(9) 0.0129(11) 0.0158(10) -0.0026(8) -0.0037(8) 0.0006(8) 
C3 0.0213(10) 0.0160(11) 0.0151(10) -0.0039(9) -0.0042(8) -0.0021(9) 
C4 0.0251(11) 0.0197(12) 0.0210(11) -0.0030(10) -0.0069(9) -0.0072(10) 
C5 0.0202(10) 0.0242(13) 0.0209(11) -0.0001(10) -0.0018(9) -0.0065(10) 
C6 0.0198(10) 0.0220(13) 0.0146(10) -0.0042(9) -0.0024(8) -0.0020(9) 
C7 0.0175(10) 0.0168(11) 0.0151(10) -0.0045(9) -0.0021(8) -0.0017(9) 
C8 0.0207(10) 0.0119(11) 0.0152(10) -0.0049(8) -0.0041(8) -0.0034(8) 
C9 0.0197(10) 0.0170(12) 0.0149(10) -0.0041(9) -0.0006(8) -0.0048(9) 
C10 0.0269(11) 0.0188(12) 0.0175(11) -0.0014(9) -0.0068(9) -0.0047(9) 
C11 0.0227(11) 0.0194(13) 0.0276(12) -0.0077(10) -0.0085(9) 0.0021(9) 
C12 0.0209(11) 0.0261(14) 0.0216(12) -0.0066(10) 0.0002(9) -0.0015(10) 
C13 0.0246(11) 0.0200(12) 0.0146(10) -0.0026(9) -0.0033(9) -0.0035(9) 
C14 0.0193(10) 0.0148(11) 0.0137(10) -0.0029(8) -0.0047(8) -0.0029(8) 
C15 0.0246(11) 0.0205(12) 0.0164(10) -0.0056(9) -0.0048(9) -0.0061(9) 
C16 0.0257(12) 0.0273(14) 0.0262(12) -0.0046(11) -0.0056(10) -0.0117(10) 
C17 0.0183(11) 0.0318(15) 0.0200(11) -0.0018(10) -0.0003(9) -0.0051(10) 
C18 0.0244(11) 0.0212(13) 0.0172(11) -0.0062(9) 0.0000(9) -0.0002(10) 
C19 0.0210(10) 0.0166(12) 0.0189(11) -0.0064(9) -0.0026(9) -0.0028(9) 
C20 0.0218(10) 0.0181(12) 0.0120(10) -0.0075(9) -0.0006(8) -0.0073(9) 
C21 0.0261(11) 0.0156(12) 0.0173(10) -0.0040(9) -0.0042(9) -0.0075(9) 
C22 0.0339(13) 0.0296(14) 0.0146(10) -0.0041(10) -0.0046(9) -0.0157(11) 
C23 0.0385(14) 0.0315(15) 0.0198(11) -0.0162(11) -0.0018(10) -0.0127(12) 
C24 0.0362(14) 0.0236(14) 0.0330(14) -0.0181(12) -0.0031(11) -0.0022(11) 
C25 0.0261(11) 0.0191(12) 0.0213(11) -0.0092(10) -0.0048(9) -0.0025(10) 
C26 0.0260(11) 0.0123(11) 0.0105(9) -0.0026(8) -0.0033(8) -0.0069(9) 
C27 0.0260(11) 0.0117(11) 0.0158(10) -0.0005(8) -0.0064(9) -0.0052(9) 
C28 0.0289(12) 0.0175(12) 0.0210(11) -0.0025(9) -0.0104(9) -0.0069(10) 
C29 0.0379(13) 0.0197(13) 0.0153(11) -0.0053(9) -0.0061(10) -0.0105(10) 
C30 0.0281(11) 0.0177(12) 0.0153(10) -0.0081(9) 0.0009(9) -0.0061(9) 
C31 0.0245(11) 0.0129(11) 0.0157(10) -0.0044(9) -0.0025(8) -0.0052(9) 
C32 0.0231(11) 0.0192(12) 0.0241(12) -0.0045(10) -0.0083(9) -0.0049(9) 
C33 0.0488(16) 0.0377(17) 0.0216(12) -0.0138(12) -0.0079(11) -0.0147(13) 
C34 0.0228(11) 0.0182(12) 0.0199(11) -0.0094(9) -0.0026(9) -0.0024(9) 
C35 0.0200(10) 0.0110(11) 0.0204(11) -0.0040(9) -0.0053(8) -0.0054(8) 
C36 0.0229(11) 0.0124(11) 0.0195(11) -0.0029(9) -0.0067(9) -0.0071(9) 
C37 0.0278(11) 0.0165(12) 0.0162(10) -0.0018(9) -0.0074(9) -0.0086(9) 
C38 0.0289(12) 0.0185(12) 0.0250(12) -0.0009(10) -0.0131(10) -0.0081(10) 
C39 0.0200(10) 0.0180(12) 0.0277(12) -0.0055(10) -0.0075(9) -0.0032(9) 
C40 0.0221(11) 0.0148(11) 0.0223(11) -0.0055(9) -0.0066(9) -0.0058(9) 
C41 0.0227(11) 0.0185(12) 0.0167(10) -0.0035(9) -0.0025(8) -0.0076(9) 
C42 0.0332(13) 0.0282(15) 0.0314(14) -0.0007(12) -0.0161(11) -0.0032(11) 
C43 0.0197(11) 0.0224(13) 0.0261(12) -0.0104(10) -0.0051(9) 0.0009(9) 
C44 0.0148(9) 0.0164(11) 0.0151(10) -0.0081(9) -0.0033(8) -0.0010(8) 
C45 0.0161(10) 0.0135(11) 0.0197(11) -0.0047(9) -0.0036(8) 0.0006(8) 
C46 0.0200(10) 0.0154(11) 0.0206(11) -0.0035(9) -0.0060(8) -0.0027(9) 
C47 0.0284(12) 0.0215(13) 0.0298(13) -0.0050(10) -0.0153(10) -0.0051(10) 
C48 0.0214(11) 0.0247(14) 0.0387(14) -0.0015(11) -0.0115(10) -0.0085(10) 
C49 0.0237(12) 0.0272(14) 0.0309(13) -0.0004(11) -0.0033(10) -0.0101(10) 
C50 0.0199(11) 0.0233(13) 0.0232(12) -0.0057(10) -0.0029(9) -0.0047(10) 
C51 0.0186(10) 0.0140(11) 0.0121(10) -0.0040(8) 0.0001(8) -0.0041(8) 
C52 0.0209(10) 0.0173(12) 0.0140(10) -0.0031(9) -0.0011(8) -0.0018(9) 
C53 0.0250(11) 0.0171(12) 0.0183(11) -0.0084(9) 0.0011(9) -0.0020(9) 
C54 0.0281(12) 0.0281(14) 0.0145(10) -0.0101(10) -0.0017(9) -0.0076(10) 
C55 0.0235(11) 0.0250(13) 0.0156(11) -0.0028(10) -0.0044(9) -0.0034(10) 
C56 0.0175(10) 0.0184(12) 0.0132(10) -0.0046(9) -0.0005(8) -0.0009(9) 
C57 0.0191(10) 0.0147(11) 0.0140(10) -0.0038(8) -0.0016(8) -0.0038(8) 
C58 0.0201(10) 0.0146(11) 0.0229(11) -0.0089(9) -0.0052(9) -0.0007(9) 
C59 0.0241(11) 0.0196(13) 0.0352(14) -0.0100(11) -0.0133(10) -0.0004(10) 
C60 0.0192(10) 0.0163(12) 0.0333(13) -0.0063(10) -0.0064(9) 0.0012(9) 
C61 0.0224(11) 0.0146(12) 0.0261(12) -0.0103(10) -0.0017(9) -0.0011(9) 
C62 0.0208(10) 0.0149(11) 0.0198(11) -0.0078(9) -0.0038(9) -0.0014(9) 
C63 0.0153(9) 0.0132(11) 0.0181(10) -0.0054(9) -0.0038(8) 0.0004(8) 
C64 0.0220(10) 0.0121(11) 0.0177(10) -0.0033(9) -0.0047(8) -0.0032(9) 
C65 0.0245(11) 0.0150(11) 0.0210(11) -0.0049(9) -0.0095(9) -0.0030(9) 
C66 0.0222(11) 0.0165(12) 0.0255(12) -0.0028(10) -0.0064(9) -0.0076(9) 
C67 0.0200(10) 0.0139(11) 0.0198(11) -0.0018(9) -0.0034(8) -0.0034(9) 
C68 0.0193(10) 0.0120(11) 0.0174(10) -0.0044(9) -0.0050(8) -0.0008(8) 
C69 0.0164(9) 0.0125(11) 0.0115(9) -0.0019(8) 0.0011(8) -0.0006(8) 
C70 0.0240(11) 0.0157(12) 0.0140(10) -0.0020(9) -0.0007(8) -0.0028(9) 
C71 0.0286(12) 0.0160(12) 0.0183(11) -0.0071(9) 0.0012(9) -0.0016(10) 
C72 0.0233(11) 0.0187(13) 0.0287(13) -0.0055(10) -0.0004(10) 0.0037(10) 
C73 0.0169(10) 0.0204(13) 0.0261(12) -0.0020(10) -0.0033(9) 0.0017(9) 
C74 0.0188(10) 0.0176(12) 0.0163(10) -0.0021(9) -0.0009(8) -0.0033(9) 
C75 0.0230(11) 0.0195(12) 0.0184(11) -0.0094(9) 0.0000(9) -0.0033(9) 
C76 0.0326(14) 0.0289(16) 0.0509(18) -0.0161(14) -0.0098(13) 0.0124(12) 
C77 0.0215(11) 0.0193(12) 0.0244(12) -0.0049(10) -0.0091(9) 0.0009(9) 
C78 0.0216(10) 0.0113(11) 0.0130(10) -0.0039(8) -0.0020(8) -0.0039(8) 
C79 0.0222(11) 0.0139(11) 0.0160(10) -0.0048(9) -0.0019(8) -0.0036(9) 
C80 0.0263(11) 0.0170(12) 0.0188(11) -0.0077(9) -0.0008(9) -0.0023(9) 
C81 0.0319(12) 0.0167(12) 0.0168(11) -0.0083(9) -0.0008(9) -0.0065(10) 
C82 0.0310(12) 0.0188(12) 0.0160(10) -0.0049(9) -0.0076(9) -0.0082(10) 
C83 0.0224(10) 0.0140(11) 0.0134(10) -0.0022(8) -0.0031(8) -0.0047(9) 
C84 0.0202(10) 0.0238(13) 0.0185(11) -0.0065(10) -0.0009(9) -0.0036(9) 
C85 0.0412(14) 0.0349(16) 0.0205(12) -0.0165(12) -0.0018(11) -0.0086(12) 
C86 0.0232(11) 0.0190(12) 0.0189(11) -0.0036(9) -0.0069(9) -0.0041(9) 
P5 0.0166(2) 0.0126(3) 0.0184(3) -0.0069(2) -0.0028(2) -0.0013(2) 
P6 0.0168(2) 0.0138(3) 0.0185(3) -0.0065(2) -0.0017(2) -0.0018(2) 
N5 0.0231(9) 0.0160(10) 0.0209(10) -0.0097(8) -0.0043(8) -0.0005(8) 
N6 0.0195(9) 0.0192(11) 0.0217(10) -0.0063(8) -0.0023(7) -0.0036(8) 
C87 0.0191(10) 0.0159(12) 0.0243(11) -0.0099(9) -0.0023(9) -0.0028(9) 
C88 0.0152(10) 0.0169(12) 0.0279(12) -0.0086(10) -0.0022(9) -0.0002(9) 
C89 0.0226(11) 0.0197(13) 0.0316(13) -0.0091(11) -0.0046(10) -0.0028(10) 
C90 0.0220(11) 0.0205(13) 0.0419(15) -0.0121(12) -0.0040(10) -0.0043(10) 
C91 0.0238(12) 0.0174(13) 0.0444(16) -0.0060(12) -0.0003(11) -0.0054(10) 
C92 0.0264(12) 0.0253(14) 0.0314(14) -0.0032(11) 0.0001(10) -0.0059(11) 
C93 0.0228(11) 0.0185(13) 0.0288(13) -0.0070(10) -0.0010(9) -0.0040(9) 
C94 0.0210(10) 0.0139(11) 0.0228(11) -0.0029(9) -0.0032(9) -0.0059(9) 
C95 0.0224(11) 0.0228(13) 0.0283(13) -0.0096(11) -0.0049(10) -0.0017(10) 
C96 0.0237(11) 0.0193(13) 0.0265(12) -0.0068(10) -0.0035(9) -0.0031(10) 
C97 0.0183(11) 0.0259(14) 0.0449(16) -0.0083(12) -0.0028(11) -0.0010(10) 
C98 0.0227(12) 0.0281(15) 0.0550(18) -0.0054(13) -0.0169(12) -0.0034(11) 
C99 0.0320(13) 0.0318(16) 0.0393(15) -0.0093(13) -0.0167(12) -0.0070(12) 
C100 0.0168(10) 0.0174(12) 0.0172(10) -0.0106(9) 0.0007(8) -0.0003(9) 
C101 0.0211(10) 0.0197(12) 0.0197(11) -0.0115(9) -0.0023(9) -0.0007(9) 
C102 0.0214(11) 0.0221(13) 0.0210(11) -0.0107(10) -0.0049(9) 0.0017(9) 
C103 0.0232(11) 0.0190(12) 0.0209(11) -0.0068(10) -0.0018(9) 0.0011(9) 
C104 0.0242(11) 0.0196(12) 0.0169(11) -0.0099(9) 0.0028(9) -0.0050(9) 
C105 0.0182(10) 0.0199(12) 0.0162(10) -0.0108(9) 0.0013(8) -0.0029(9) 
C106 0.0253(11) 0.0222(13) 0.0300(13) -0.0116(11) -0.0097(10) -0.0017(10) 
C107 0.0367(14) 0.0217(14) 0.0340(14) -0.0018(11) -0.0136(11) -0.0013(11) 
C108 0.0252(11) 0.0199(12) 0.0212(11) -0.0084(10) -0.0014(9) -0.0072(10) 
C109 0.0177(10) 0.0190(12) 0.0299(13) -0.0097(10) -0.0058(9) -0.0002(9) 
C110 0.0282(12) 0.0264(14) 0.0312(13) -0.0060(11) -0.0092(10) -0.0075(11) 
C111 0.0299(13) 0.0312(16) 0.0431(16) -0.0053(13) -0.0086(11) -0.0156(12) 
C112 0.0312(13) 0.0386(17) 0.0509(18) -0.0180(15) -0.0132(12) -0.0119(12) 
C113 0.0349(14) 0.0469(19) 0.0360(15) -0.0185(14) -0.0076(12) -0.0141(13) 
C114 0.0279(12) 0.0367(16) 0.0295(13) -0.0128(12) -0.0038(10) -0.0096(12) 
C115 0.0189(10) 0.0166(12) 0.0208(11) -0.0074(9) -0.0046(8) -0.0029(9) 
C116 0.0238(11) 0.0212(13) 0.0218(12) -0.0081(10) -0.0005(9) 0.0001(10) 
C117 0.0276(12) 0.0242(14) 0.0211(12) -0.0042(10) -0.0026(10) -0.0008(10) 
C118 0.0243(11) 0.0224(13) 0.0232(12) -0.0033(10) -0.0094(9) 0.0004(10) 
C119 0.0185(10) 0.0214(13) 0.0286(13) -0.0102(10) -0.0036(9) 0.0018(9) 
C120 0.0203(10) 0.0203(12) 0.0187(11) -0.0074(9) -0.0024(9) -0.0019(9) 
C121 0.0197(10) 0.0179(12) 0.0188(11) -0.0087(9) 0.0004(8) -0.0029(9) 
C122 0.0299(12) 0.0229(13) 0.0229(12) -0.0062(10) -0.0042(10) -0.0093(10) 
C123 0.0417(14) 0.0192(13) 0.0247(12) 0.0016(10) -0.0104(11) -0.0098(11) 
C124 0.0329(13) 0.0232(14) 0.0270(13) -0.0061(11) -0.0101(10) -0.0059(11) 
C125 0.0267(11) 0.0225(13) 0.0245(12) -0.0072(10) -0.0040(9) -0.0076(10) 
C126 0.0219(11) 0.0179(12) 0.0205(11) -0.0089(10) -0.0001(9) -0.0035(9) 
C127 0.0504(16) 0.0280(15) 0.0303(14) 0.0041(12) -0.0153(12) -0.0227(13) 
C128 0.0461(16) 0.0325(16) 0.0337(15) -0.0014(12) -0.0198(12) -0.0125(13) 
C129 0.0300(12) 0.0216(13) 0.0237(12) -0.0065(10) -0.0028(10) -0.0085(10) 
C130 0.078(3) 0.065(3) 0.048(2) -0.027(2) 0.0004(19) -0.026(2) 
C131 0.0388(15) 0.050(2) 0.0392(16) -0.0236(15) -0.0103(13) -0.0087(14) 
C132 0.0386(16) 0.071(3) 0.0406(17) -0.0371(19) -0.0097(13) -0.0008(16) 
C133 0.0522(19) 0.046(2) 0.065(2) -0.0307(19) -0.0369(18) 0.0146(16) 
C134 0.0482(18) 0.042(2) 0.060(2) -0.0119(17) -0.0290(17) -0.0014(15) 
C135 0.0293(14) 0.050(2) 0.0524(19) -0.0132(17) -0.0095(13) -0.0013(14) 
C136 0.0326(14) 0.0390(19) 0.0524(19) -0.0208(16) -0.0080(13) 0.0026(13) 
C137 0.0300(13) 0.0325(16) 0.0411(16) -0.0072(13) -0.0080(12) -0.0053(12) 
C138 0.0160(11) 0.0320(15) 0.0402(15) -0.0118(12) -0.0020(10) -0.0025(10) 
C139 0.0234(12) 0.0346(16) 0.0351(14) -0.0095(12) -0.0075(10) -0.0045(11) 
C140 0.0267(13) 0.0388(17) 0.0405(16) 0.0006(13) -0.0111(11) -0.0102(12) 
C141 0.0342(14) 0.0323(17) 0.058(2) -0.0084(15) -0.0192(13) -0.0106(12) 
C142 0.0373(15) 0.0391(18) 0.0471(18) -0.0158(14) -0.0181(13) -0.0066(13) 
C143 0.0280(13) 0.0375(17) 0.0371(15) -0.0107(13) -0.0118(11) -0.0006(12) 
C144 0.092(3) 0.072(3) 0.0358(18) -0.0225(19) 0.0133(19) -0.054(2) 
C145 0.0529(17) 0.0251(15) 0.0272(14) -0.0076(11) -0.0055(12) -0.0138(13) 
C146 0.0436(15) 0.0274(15) 0.0251(13) -0.0098(11) -0.0108(11) -0.0091(12) 
C147 0.0329(13) 0.0352(16) 0.0312(14) -0.0091(12) -0.0124(11) -0.0065(12) 
C148 0.0344(14) 0.0378(17) 0.0262(13) -0.0111(12) -0.0094(11) 0.0025(12) 
C149 0.0475(16) 0.0237(14) 0.0280(13) -0.0140(11) -0.0149(12) 0.0034(12) 
C150 0.0520(16) 0.0207(14) 0.0333(14) -0.0074(12) -0.0136(13) -0.0101(12) 
C151 0.0525(18) 0.0377(19) 0.054(2) -0.0050(16) -0.0237(16) -0.0112(15) 
C152 0.0349(14) 0.0215(14) 0.0476(17) -0.0093(13) -0.0093(12) -0.0035(11) 
C153 0.0335(14) 0.0238(15) 0.0547(19) -0.0074(14) -0.0081(13) -0.0065(12) 
C154 0.059(2) 0.0343(19) 0.049(2) -0.0066(15) -0.0054(16) -0.0105(16) 
C155 0.073(2) 0.041(2) 0.052(2) -0.0048(17) -0.0306(18) -0.0145(18) 
C156 0.0449(17) 0.041(2) 0.067(2) 0.0008(18) -0.0249(17) -0.0129(15) 
C157 0.0283(13) 0.0300(16) 0.0527(18) -0.0064(14) -0.0101(13) -0.0025(12) 
 
_geom_special_details 
; 
 All esds (except the esd in the dihedral angle between two l.s. planes) 
 are estimated using the full covariance matrix.  The cell esds are taken 
 into account individually in the estimation of esds in distances, angles 
 and torsion angles; correlations between esds in cell parameters are only 
 used when they are defined by crystal symmetry.  An approximate (isotropic) 
 treatment of cell esds is used for estimating esds involving l.s. planes. 
; 
 
loop_ 
 _geom_bond_atom_site_label_1 
 _geom_bond_atom_site_label_2 
 _geom_bond_distance 
 _geom_bond_site_symmetry_2 
 _geom_bond_publ_flag 
Dy1 N2 2.3445(18) . ? 
Dy1 N3 2.3584(17) . ? 
Dy1 N1 2.3849(19) . ? 
Dy1 N4 2.3866(19) . ? 
Dy1 C1 2.676(2) . ? 
Dy1 C44 2.679(2) . ? 
P1 N1 1.633(2) . ? 
P1 C1 1.735(2) . ? 
P1 C2 1.806(2) . ? 
P1 C8 1.827(2) . ? 
P2 N2 1.631(2) . ? 
P2 C1 1.752(2) . ? 
P2 C14 1.819(2) . ? 
P2 C20 1.821(2) . ? 
P3 N3 1.6365(19) . ? 
P3 C44 1.746(2) . ? 
P3 C51 1.817(2) . ? 
P3 C45 1.822(2) . ? 
P4 N4 1.627(2) . ? 
P4 C44 1.733(2) . ? 
P4 C57 1.822(2) . ? 
P4 C63 1.824(2) . ? 
N1 C26 1.446(3) . ? 
N2 C35 1.441(3) . ? 
N3 C69 1.443(3) . ? 
N4 C78 1.448(3) . ? 
C1 H1 1.0000 . ? 
C2 C7 1.392(3) . ? 
C2 C3 1.397(3) . ? 
C3 C4 1.385(3) . ? 
C3 H3 0.9500 . ? 
C4 C5 1.384(4) . ? 
C4 H4 0.9500 . ? 
C5 C6 1.382(4) . ? 
C5 H5 0.9500 . ? 
C6 C7 1.388(3) . ? 
C6 H6 0.9500 . ? 
C7 H7 0.9500 . ? 
C8 C13 1.390(3) . ? 
C8 C9 1.392(3) . ? 
C9 C10 1.389(3) . ? 
C9 H9 0.9500 . ? 
C10 C11 1.378(4) . ? 
C10 H10 0.9500 . ? 
C11 C12 1.384(4) . ? 
C11 H11 0.9500 . ? 
C12 C13 1.392(4) . ? 
C12 H12 0.9500 . ? 
C13 H13 0.9500 . ? 
C14 C15 1.395(3) . ? 
C14 C19 1.396(3) . ? 
C15 C16 1.380(3) . ? 
C15 H15 0.9500 . ? 
C16 C17 1.389(4) . ? 
C16 H16 0.9500 . ? 
C17 C18 1.391(4) . ? 
C17 H17 0.9500 . ? 
C18 C19 1.385(3) . ? 
C18 H18 0.9500 . ? 
C19 H19 0.9500 . ? 
C20 C25 1.386(4) . ? 
C20 C21 1.400(3) . ? 
C21 C22 1.383(3) . ? 
C21 H21 0.9500 . ? 
C22 C23 1.383(4) . ? 
C22 H22 0.9500 . ? 
C23 C24 1.383(4) . ? 
C23 H23 0.9500 . ? 
C24 C25 1.393(4) . ? 
C24 H24 0.9500 . ? 
C25 H25 0.9500 . ? 
C26 C27 1.402(3) . ? 
C26 C31 1.411(3) . ? 
C27 C28 1.402(3) . ? 
C27 C32 1.503(3) . ? 
C28 C29 1.383(4) . ? 
C28 H28 0.9500 . ? 
C29 C30 1.383(4) . ? 
C29 C33 1.511(3) . ? 
C30 C31 1.395(3) . ? 
C30 H30 0.9500 . ? 
C31 C34 1.499(3) . ? 
C32 H32A 0.9800 . ? 
C32 H32B 0.9800 . ? 
C32 H32C 0.9800 . ? 
C33 H33A 0.9800 . ? 
C33 H33B 0.9800 . ? 
C33 H33C 0.9800 . ? 
C34 H34A 0.9800 . ? 
C34 H34B 0.9800 . ? 
C34 H34C 0.9800 . ? 
C35 C40 1.410(3) . ? 
C35 C36 1.413(3) . ? 
C36 C37 1.395(3) . ? 
C36 C41 1.502(3) . ? 
C37 C38 1.382(4) . ? 
C37 H37 0.9500 . ? 
C38 C39 1.392(4) . ? 
C38 C42 1.510(4) . ? 
C39 C40 1.394(4) . ? 
C39 H39 0.9500 . ? 
C40 C43 1.504(3) . ? 
C41 H41A 0.9800 . ? 
C41 H41B 0.9800 . ? 
C41 H41C 0.9800 . ? 
C42 H42A 0.9800 . ? 
C42 H42B 0.9800 . ? 
C42 H42C 0.9800 . ? 
C43 H43A 0.9800 . ? 
C43 H43B 0.9800 . ? 
C43 H43C 0.9800 . ? 
C44 H44 1.0000 . ? 
C45 C50 1.393(3) . ? 
C45 C46 1.395(3) . ? 
C46 C47 1.384(3) . ? 
C46 H46 0.9500 . ? 
C47 C48 1.385(4) . ? 
C47 H47 0.9500 . ? 
C48 C49 1.383(4) . ? 
C48 H48 0.9500 . ? 
C49 C50 1.398(4) . ? 
C49 H49 0.9500 . ? 
C50 H50 0.9500 . ? 
C51 C56 1.387(3) . ? 
C51 C52 1.402(3) . ? 
C52 C53 1.388(3) . ? 
C52 H52 0.9500 . ? 
C53 C54 1.388(4) . ? 
C53 H53 0.9500 . ? 
C54 C55 1.387(4) . ? 
C54 H54 0.9500 . ? 
C55 C56 1.390(3) . ? 
C55 H55 0.9500 . ? 
C56 H56 0.9500 . ? 
C57 C58 1.390(3) . ? 
C57 C62 1.399(3) . ? 
C58 C59 1.388(3) . ? 
C58 H58 0.9500 . ? 
C59 C60 1.386(4) . ? 
C59 H59 0.9500 . ? 
C60 C61 1.385(4) . ? 
C60 H60 0.9500 . ? 
C61 C62 1.384(3) . ? 
C61 H61 0.9500 . ? 
C62 H62 0.9500 . ? 
C63 C68 1.398(3) . ? 
C63 C64 1.401(3) . ? 
C64 C65 1.387(3) . ? 
C64 H64 0.9500 . ? 
C65 C66 1.385(3) . ? 
C65 H65 0.9500 . ? 
C66 C67 1.396(4) . ? 
C66 H66 0.9500 . ? 
C67 C68 1.383(3) . ? 
C67 H67 0.9500 . ? 
C68 H68 0.9500 . ? 
C69 C74 1.410(3) . ? 
C69 C70 1.412(3) . ? 
C70 C71 1.390(4) . ? 
C70 C75 1.499(3) . ? 
C71 C72 1.394(4) . ? 
C71 H71 0.9500 . ? 
C72 C73 1.380(4) . ? 
C72 C76 1.510(4) . ? 
C73 C74 1.398(4) . ? 
C73 H73 0.9500 . ? 
C74 C77 1.503(4) . ? 
C75 H75A 0.9800 . ? 
C75 H75B 0.9800 . ? 
C75 H75C 0.9800 . ? 
C76 H76A 0.9800 . ? 
C76 H76B 0.9800 . ? 
C76 H76C 0.9800 . ? 
C77 H77A 0.9800 . ? 
C77 H77B 0.9800 . ? 
C77 H77C 0.9800 . ? 
C78 C79 1.408(3) . ? 
C78 C83 1.411(3) . ? 
C79 C80 1.397(3) . ? 
C79 C84 1.512(3) . ? 
C80 C81 1.384(4) . ? 
C80 H80 0.9500 . ? 
C81 C82 1.392(4) . ? 
C81 C85 1.513(3) . ? 
C82 C83 1.388(3) . ? 
C82 H82 0.9500 . ? 
C83 C86 1.504(3) . ? 
C84 H84A 0.9800 . ? 
C84 H84B 0.9800 . ? 
C84 H84C 0.9800 . ? 
C85 H85A 0.9800 . ? 
C85 H85B 0.9800 . ? 
C85 H85C 0.9800 . ? 
C86 H86A 0.9800 . ? 
C86 H86B 0.9800 . ? 
C86 H86C 0.9800 . ? 
P5 N5 1.597(2) . ? 
P5 C87 1.707(2) . ? 
P5 C88 1.817(3) . ? 
P5 C94 1.844(2) . ? 
P6 N6 1.586(2) . ? 
P6 C87 1.711(2) . ? 
P6 C109 1.828(3) . ? 
P6 C115 1.837(3) . ? 
N5 C100 1.388(3) . ? 
N6 C121 1.388(3) . ? 
C87 H87 0.9500 . ? 
C88 C89 1.392(4) . ? 
C88 C93 1.393(4) . ? 
C89 C90 1.388(4) . ? 
C89 H89 0.9500 . ? 
C90 C91 1.375(4) . ? 
C90 H90 0.9500 . ? 
C91 C92 1.390(4) . ? 
C91 H91 0.9500 . ? 
C92 C93 1.396(4) . ? 
C92 H92 0.9500 . ? 
C93 H93 0.9500 . ? 
C94 C95 1.392(4) . ? 
C94 C96 1.395(4) . ? 
C95 C99 1.396(4) . ? 
C95 H95 0.9500 . ? 
C96 C97 1.388(4) . ? 
C96 H96 0.9500 . ? 
C97 C98 1.387(5) . ? 
C97 H97 0.9500 . ? 
C98 C99 1.384(4) . ? 
C98 H98 0.9500 . ? 
C99 H99 0.9500 . ? 
C100 C105 1.421(3) . ? 
C100 C101 1.423(3) . ? 
C101 C102 1.388(4) . ? 
C101 C106 1.501(3) . ? 
C102 C103 1.390(4) . ? 
C102 H102 0.9500 . ? 
C103 C104 1.393(4) . ? 
C103 C107 1.506(4) . ? 
C104 C105 1.396(4) . ? 
C104 H104 0.9500 . ? 
C105 C108 1.509(3) . ? 
C106 H10A 0.9800 . ? 
C106 H10B 0.9800 . ? 
C106 H10C 0.9800 . ? 
C107 H10D 0.9800 . ? 
C107 H10E 0.9800 . ? 
C107 H10F 0.9800 . ? 
C108 H10G 0.9800 . ? 
C108 H10H 0.9800 . ? 
C108 H10I 0.9800 . ? 
C109 C110 1.388(4) . ? 
C109 C114 1.400(4) . ? 
C110 C111 1.393(4) . ? 
C110 H110 0.9500 . ? 
C111 C112 1.385(5) . ? 
C111 H111 0.9500 . ? 
C112 C113 1.386(5) . ? 
C112 H112 0.9500 . ? 
C113 C114 1.393(4) . ? 
C113 H113 0.9500 . ? 
C114 H114 0.9500 . ? 
C115 C116 1.387(4) . ? 
C115 C120 1.397(3) . ? 
C116 C117 1.389(4) . ? 
C116 H116 0.9500 . ? 
C117 C118 1.379(4) . ? 
C117 H117 0.9500 . ? 
C118 C119 1.389(4) . ? 
C118 H118 0.9500 . ? 
C119 C120 1.379(4) . ? 
C119 H119 0.9500 . ? 
C120 H120 0.9500 . ? 
C121 C122 1.416(4) . ? 
C121 C126 1.419(3) . ? 
C122 C123 1.390(4) . ? 
C122 C127 1.497(4) . ? 
C123 C124 1.389(4) . ? 
C123 H123 0.9500 . ? 
C124 C125 1.384(4) . ? 
C124 C128 1.512(4) . ? 
C125 C126 1.396(4) . ? 
C125 H125 0.9500 . ? 
C126 C129 1.501(4) . ? 
C127 H12A 0.9800 . ? 
C127 H12B 0.9800 . ? 
C127 H12C 0.9800 . ? 
C128 H12D 0.9800 . ? 
C128 H12E 0.9800 . ? 
C128 H12F 0.9800 . ? 
C129 H12G 0.9800 . ? 
C129 H12H 0.9800 . ? 
C129 H12I 0.9800 . ? 
C130 C131 1.501(6) . ? 
C130 H13A 0.9800 . ? 
C130 H13B 0.9800 . ? 
C130 H13C 0.9800 . ? 
C131 C136 1.388(5) . ? 
C131 C132 1.396(5) . ? 
C132 C133 1.388(6) . ? 
C132 H132 0.9500 . ? 
C133 C134 1.371(6) . ? 
C133 H133 0.9500 . ? 
C134 C135 1.382(5) . ? 
C134 H134 0.9500 . ? 
C135 C136 1.370(5) . ? 
C135 H135 0.9500 . ? 
C136 H136 0.9500 . ? 
C137 C138 1.496(4) . ? 
C137 H13D 0.9800 . ? 
C137 H13E 0.9800 . ? 
C137 H13F 0.9800 . ? 
C138 C139 1.387(4) . ? 
C138 C143 1.401(4) . ? 
C139 C140 1.388(5) . ? 
C139 H139 0.9500 . ? 
C140 C141 1.384(5) . ? 
C140 H140 0.9500 . ? 
C141 C142 1.388(5) . ? 
C141 H141 0.9500 . ? 
C142 C143 1.368(5) . ? 
C142 H142 0.9500 . ? 
C143 H143 0.9500 . ? 
C144 C145 1.507(4) . ? 
C144 H14A 0.9800 . ? 
C144 H14B 0.9800 . ? 
C144 H14C 0.9800 . ? 
C145 C146 1.392(4) . ? 
C145 C150 1.395(4) . ? 
C146 C147 1.381(4) . ? 
C146 H146 0.9500 . ? 
C147 C148 1.388(4) . ? 
C147 H147 0.9500 . ? 
C148 C149 1.378(5) . ? 
C148 H148 0.9500 . ? 
C149 C150 1.382(4) . ? 
C149 H149 0.9500 . ? 
C150 H150 0.9500 . ? 
C151 C152 1.504(5) . ? 
C151 H15A 0.9800 . ? 
C151 H15B 0.9800 . ? 
C151 H15C 0.9800 . ? 
C152 C153 1.382(5) . ? 
C152 C157 1.382(4) . ? 
C153 C154 1.381(5) . ? 
C153 H153 0.9500 . ? 
C154 C155 1.404(6) . ? 
C154 H154 0.9500 . ? 
C155 C156 1.371(6) . ? 
C155 H155 0.9500 . ? 
C156 C157 1.365(5) . ? 
C156 H156 0.9500 . ? 
C157 H157 0.9500 . ? 
 
loop_ 
 _geom_angle_atom_site_label_1 
 _geom_angle_atom_site_label_2 
 _geom_angle_atom_site_label_3 
 _geom_angle 
 _geom_angle_site_symmetry_1 
 _geom_angle_site_symmetry_3 
 _geom_angle_publ_flag 
N2 Dy1 N3 116.99(6) . . ? 
N2 Dy1 N1 105.14(6) . . ? 
N3 Dy1 N1 117.39(6) . . ? 
N2 Dy1 N4 116.54(6) . . ? 
N3 Dy1 N4 104.76(6) . . ? 
N1 Dy1 N4 94.22(6) . . ? 
N2 Dy1 C1 63.52(7) . . ? 
N3 Dy1 C1 96.59(6) . . ? 
N1 Dy1 C1 62.91(7) . . ? 
N4 Dy1 C1 154.36(6) . . ? 
N2 Dy1 C44 95.16(7) . . ? 
N3 Dy1 C44 63.79(6) . . ? 
N1 Dy1 C44 154.59(7) . . ? 
N4 Dy1 C44 62.59(7) . . ? 
C1 Dy1 C44 141.86(6) . . ? 
N1 P1 C1 103.85(11) . . ? 
N1 P1 C2 116.06(10) . . ? 
C1 P1 C2 113.39(11) . . ? 
N1 P1 C8 115.27(10) . . ? 
C1 P1 C8 107.16(10) . . ? 
C2 P1 C8 101.14(10) . . ? 
N2 P2 C1 103.46(10) . . ? 
N2 P2 C14 113.75(10) . . ? 
C1 P2 C14 115.20(10) . . ? 
N2 P2 C20 114.37(10) . . ? 
C1 P2 C20 109.52(11) . . ? 
C14 P2 C20 100.92(10) . . ? 
N3 P3 C44 104.50(10) . . ? 
N3 P3 C51 114.44(10) . . ? 
C44 P3 C51 107.95(10) . . ? 
N3 P3 C45 113.06(10) . . ? 
C44 P3 C45 114.07(11) . . ? 
C51 P3 C45 103.01(10) . . ? 
N4 P4 C44 103.67(11) . . ? 
N4 P4 C57 115.25(10) . . ? 
C44 P4 C57 108.21(11) . . ? 
N4 P4 C63 115.71(10) . . ? 
C44 P4 C63 114.71(10) . . ? 
C57 P4 C63 99.52(10) . . ? 
C26 N1 P1 123.85(16) . . ? 
C26 N1 Dy1 133.10(14) . . ? 
P1 N1 Dy1 102.63(9) . . ? 
C35 N2 P2 123.28(15) . . ? 
C35 N2 Dy1 131.70(14) . . ? 
P2 N2 Dy1 103.92(9) . . ? 
C69 N3 P3 121.41(14) . . ? 
C69 N3 Dy1 135.42(14) . . ? 
P3 N3 Dy1 103.03(9) . . ? 
C78 N4 P4 121.99(16) . . ? 
C78 N4 Dy1 134.01(14) . . ? 
P4 N4 Dy1 103.07(9) . . ? 
P1 C1 P2 128.19(12) . . ? 
P1 C1 Dy1 89.30(9) . . ? 
P2 C1 Dy1 88.57(9) . . ? 
P1 C1 H1 114.0 . . ? 
P2 C1 H1 114.0 . . ? 
Dy1 C1 H1 114.0 . . ? 
C7 C2 C3 119.5(2) . . ? 
C7 C2 P1 123.33(18) . . ? 
C3 C2 P1 117.10(17) . . ? 
C4 C3 C2 120.5(2) . . ? 
C4 C3 H3 119.8 . . ? 
C2 C3 H3 119.8 . . ? 
C5 C4 C3 119.6(2) . . ? 
C5 C4 H4 120.2 . . ? 
C3 C4 H4 120.2 . . ? 
C6 C5 C4 120.5(2) . . ? 
C6 C5 H5 119.8 . . ? 
C4 C5 H5 119.8 . . ? 
C5 C6 C7 120.3(2) . . ? 
C5 C6 H6 119.8 . . ? 
C7 C6 H6 119.8 . . ? 
C6 C7 C2 119.7(2) . . ? 
C6 C7 H7 120.2 . . ? 
C2 C7 H7 120.2 . . ? 
C13 C8 C9 119.0(2) . . ? 
C13 C8 P1 120.34(18) . . ? 
C9 C8 P1 120.57(17) . . ? 
C10 C9 C8 120.3(2) . . ? 
C10 C9 H9 119.9 . . ? 
C8 C9 H9 119.9 . . ? 
C11 C10 C9 120.5(2) . . ? 
C11 C10 H10 119.7 . . ? 
C9 C10 H10 119.7 . . ? 
C10 C11 C12 119.7(2) . . ? 
C10 C11 H11 120.2 . . ? 
C12 C11 H11 120.2 . . ? 
C11 C12 C13 120.2(2) . . ? 
C11 C12 H12 119.9 . . ? 
C13 C12 H12 119.9 . . ? 
C8 C13 C12 120.4(2) . . ? 
C8 C13 H13 119.8 . . ? 
C12 C13 H13 119.8 . . ? 
C15 C14 C19 118.3(2) . . ? 
C15 C14 P2 122.43(17) . . ? 
C19 C14 P2 119.21(17) . . ? 
C16 C15 C14 120.8(2) . . ? 
C16 C15 H15 119.6 . . ? 
C14 C15 H15 119.6 . . ? 
C15 C16 C17 120.3(2) . . ? 
C15 C16 H16 119.9 . . ? 
C17 C16 H16 119.9 . . ? 
C16 C17 C18 119.9(2) . . ? 
C16 C17 H17 120.1 . . ? 
C18 C17 H17 120.1 . . ? 
C19 C18 C17 119.4(2) . . ? 
C19 C18 H18 120.3 . . ? 
C17 C18 H18 120.3 . . ? 
C18 C19 C14 121.3(2) . . ? 
C18 C19 H19 119.3 . . ? 
C14 C19 H19 119.3 . . ? 
C25 C20 C21 119.2(2) . . ? 
C25 C20 P2 122.87(18) . . ? 
C21 C20 P2 117.50(18) . . ? 
C22 C21 C20 120.6(2) . . ? 
C22 C21 H21 119.7 . . ? 
C20 C21 H21 119.7 . . ? 
C23 C22 C21 119.8(2) . . ? 
C23 C22 H22 120.1 . . ? 
C21 C22 H22 120.1 . . ? 
C22 C23 C24 120.2(2) . . ? 
C22 C23 H23 119.9 . . ? 
C24 C23 H23 119.9 . . ? 
C23 C24 C25 120.2(3) . . ? 
C23 C24 H24 119.9 . . ? 
C25 C24 H24 119.9 . . ? 
C20 C25 C24 120.0(2) . . ? 
C20 C25 H25 120.0 . . ? 
C24 C25 H25 120.0 . . ? 
C27 C26 C31 119.3(2) . . ? 
C27 C26 N1 121.5(2) . . ? 
C31 C26 N1 119.1(2) . . ? 
C28 C27 C26 119.0(2) . . ? 
C28 C27 C32 117.8(2) . . ? 
C26 C27 C32 123.2(2) . . ? 
C29 C28 C27 122.3(2) . . ? 
C29 C28 H28 118.8 . . ? 
C27 C28 H28 118.8 . . ? 
C30 C29 C28 117.9(2) . . ? 
C30 C29 C33 120.5(2) . . ? 
C28 C29 C33 121.7(2) . . ? 
C29 C30 C31 122.2(2) . . ? 
C29 C30 H30 118.9 . . ? 
C31 C30 H30 118.9 . . ? 
C30 C31 C26 119.2(2) . . ? 
C30 C31 C34 118.4(2) . . ? 
C26 C31 C34 122.4(2) . . ? 
C27 C32 H32A 109.5 . . ? 
C27 C32 H32B 109.5 . . ? 
H32A C32 H32B 109.5 . . ? 
C27 C32 H32C 109.5 . . ? 
H32A C32 H32C 109.5 . . ? 
H32B C32 H32C 109.5 . . ? 
C29 C33 H33A 109.5 . . ? 
C29 C33 H33B 109.5 . . ? 
H33A C33 H33B 109.5 . . ? 
C29 C33 H33C 109.5 . . ? 
H33A C33 H33C 109.5 . . ? 
H33B C33 H33C 109.5 . . ? 
C31 C34 H34A 109.5 . . ? 
C31 C34 H34B 109.5 . . ? 
H34A C34 H34B 109.5 . . ? 
C31 C34 H34C 109.5 . . ? 
H34A C34 H34C 109.5 . . ? 
H34B C34 H34C 109.5 . . ? 
C40 C35 C36 118.5(2) . . ? 
C40 C35 N2 122.7(2) . . ? 
C36 C35 N2 118.7(2) . . ? 
C37 C36 C35 120.1(2) . . ? 
C37 C36 C41 118.1(2) . . ? 
C35 C36 C41 121.8(2) . . ? 
C38 C37 C36 122.0(2) . . ? 
C38 C37 H37 119.0 . . ? 
C36 C37 H37 119.0 . . ? 
C37 C38 C39 117.4(2) . . ? 
C37 C38 C42 121.4(2) . . ? 
C39 C38 C42 121.1(2) . . ? 
C38 C39 C40 122.8(2) . . ? 
C38 C39 H39 118.6 . . ? 
C40 C39 H39 118.6 . . ? 
C39 C40 C35 119.1(2) . . ? 
C39 C40 C43 117.8(2) . . ? 
C35 C40 C43 123.1(2) . . ? 
C36 C41 H41A 109.5 . . ? 
C36 C41 H41B 109.5 . . ? 
H41A C41 H41B 109.5 . . ? 
C36 C41 H41C 109.5 . . ? 
H41A C41 H41C 109.5 . . ? 
H41B C41 H41C 109.5 . . ? 
C38 C42 H42A 109.5 . . ? 
C38 C42 H42B 109.5 . . ? 
H42A C42 H42B 109.5 . . ? 
C38 C42 H42C 109.5 . . ? 
H42A C42 H42C 109.5 . . ? 
H42B C42 H42C 109.5 . . ? 
C40 C43 H43A 109.5 . . ? 
C40 C43 H43B 109.5 . . ? 
H43A C43 H43B 109.5 . . ? 
C40 C43 H43C 109.5 . . ? 
H43A C43 H43C 109.5 . . ? 
H43B C43 H43C 109.5 . . ? 
P4 C44 P3 129.11(13) . . ? 
P4 C44 Dy1 89.48(9) . . ? 
P3 C44 Dy1 88.48(9) . . ? 
P4 C44 H44 113.6 . . ? 
P3 C44 H44 113.6 . . ? 
Dy1 C44 H44 113.6 . . ? 
C50 C45 C46 119.1(2) . . ? 
C50 C45 P3 122.20(19) . . ? 
C46 C45 P3 118.52(17) . . ? 
C47 C46 C45 121.2(2) . . ? 
C47 C46 H46 119.4 . . ? 
C45 C46 H46 119.4 . . ? 
C46 C47 C48 119.5(2) . . ? 
C46 C47 H47 120.3 . . ? 
C48 C47 H47 120.3 . . ? 
C49 C48 C47 120.1(2) . . ? 
C49 C48 H48 120.0 . . ? 
C47 C48 H48 120.0 . . ? 
C48 C49 C50 120.6(2) . . ? 
C48 C49 H49 119.7 . . ? 
C50 C49 H49 119.7 . . ? 
C45 C50 C49 119.5(2) . . ? 
C45 C50 H50 120.2 . . ? 
C49 C50 H50 120.2 . . ? 
C56 C51 C52 119.0(2) . . ? 
C56 C51 P3 122.76(17) . . ? 
C52 C51 P3 118.22(17) . . ? 
C53 C52 C51 120.1(2) . . ? 
C53 C52 H52 119.9 . . ? 
C51 C52 H52 119.9 . . ? 
C54 C53 C52 120.2(2) . . ? 
C54 C53 H53 119.9 . . ? 
C52 C53 H53 119.9 . . ? 
C55 C54 C53 120.1(2) . . ? 
C55 C54 H54 119.9 . . ? 
C53 C54 H54 119.9 . . ? 
C54 C55 C56 119.7(2) . . ? 
C54 C55 H55 120.2 . . ? 
C56 C55 H55 120.2 . . ? 
C51 C56 C55 120.9(2) . . ? 
C51 C56 H56 119.5 . . ? 
C55 C56 H56 119.5 . . ? 
C58 C57 C62 119.5(2) . . ? 
C58 C57 P4 122.57(18) . . ? 
C62 C57 P4 117.75(17) . . ? 
C59 C58 C57 119.7(2) . . ? 
C59 C58 H58 120.2 . . ? 
C57 C58 H58 120.2 . . ? 
C60 C59 C58 120.4(2) . . ? 
C60 C59 H59 119.8 . . ? 
C58 C59 H59 119.8 . . ? 
C61 C60 C59 120.2(2) . . ? 
C61 C60 H60 119.9 . . ? 
C59 C60 H60 119.9 . . ? 
C62 C61 C60 119.7(2) . . ? 
C62 C61 H61 120.2 . . ? 
C60 C61 H61 120.2 . . ? 
C61 C62 C57 120.4(2) . . ? 
C61 C62 H62 119.8 . . ? 
C57 C62 H62 119.8 . . ? 
C68 C63 C64 119.2(2) . . ? 
C68 C63 P4 116.92(17) . . ? 
C64 C63 P4 123.84(17) . . ? 
C65 C64 C63 120.3(2) . . ? 
C65 C64 H64 119.8 . . ? 
C63 C64 H64 119.8 . . ? 
C66 C65 C64 120.0(2) . . ? 
C66 C65 H65 120.0 . . ? 
C64 C65 H65 120.0 . . ? 
C65 C66 C67 120.1(2) . . ? 
C65 C66 H66 119.9 . . ? 
C67 C66 H66 119.9 . . ? 
C68 C67 C66 120.0(2) . . ? 
C68 C67 H67 120.0 . . ? 
C66 C67 H67 120.0 . . ? 
C67 C68 C63 120.3(2) . . ? 
C67 C68 H68 119.8 . . ? 
C63 C68 H68 119.8 . . ? 
C74 C69 C70 118.4(2) . . ? 
C74 C69 N3 121.9(2) . . ? 
C70 C69 N3 119.6(2) . . ? 
C71 C70 C69 119.7(2) . . ? 
C71 C70 C75 118.5(2) . . ? 
C69 C70 C75 121.8(2) . . ? 
C70 C71 C72 122.3(2) . . ? 
C70 C71 H71 118.9 . . ? 
C72 C71 H71 118.9 . . ? 
C73 C72 C71 117.4(2) . . ? 
C73 C72 C76 121.2(3) . . ? 
C71 C72 C76 121.3(3) . . ? 
C72 C73 C74 122.5(2) . . ? 
C72 C73 H73 118.7 . . ? 
C74 C73 H73 118.7 . . ? 
C73 C74 C69 119.4(2) . . ? 
C73 C74 C77 117.4(2) . . ? 
C69 C74 C77 123.0(2) . . ? 
C70 C75 H75A 109.5 . . ? 
C70 C75 H75B 109.5 . . ? 
H75A C75 H75B 109.5 . . ? 
C70 C75 H75C 109.5 . . ? 
H75A C75 H75C 109.5 . . ? 
H75B C75 H75C 109.5 . . ? 
C72 C76 H76A 109.5 . . ? 
C72 C76 H76B 109.5 . . ? 
H76A C76 H76B 109.5 . . ? 
C72 C76 H76C 109.5 . . ? 
H76A C76 H76C 109.5 . . ? 
H76B C76 H76C 109.5 . . ? 
C74 C77 H77A 109.5 . . ? 
C74 C77 H77B 109.5 . . ? 
H77A C77 H77B 109.5 . . ? 
C74 C77 H77C 109.5 . . ? 
H77A C77 H77C 109.5 . . ? 
H77B C77 H77C 109.5 . . ? 
C79 C78 C83 119.1(2) . . ? 
C79 C78 N4 121.1(2) . . ? 
C83 C78 N4 119.70(19) . . ? 
C80 C79 C78 119.0(2) . . ? 
C80 C79 C84 117.5(2) . . ? 
C78 C79 C84 123.4(2) . . ? 
C81 C80 C79 122.3(2) . . ? 
C81 C80 H80 118.9 . . ? 
C79 C80 H80 118.9 . . ? 
C80 C81 C82 118.0(2) . . ? 
C80 C81 C85 120.5(2) . . ? 
C82 C81 C85 121.5(2) . . ? 
C83 C82 C81 121.9(2) . . ? 
C83 C82 H82 119.1 . . ? 
C81 C82 H82 119.1 . . ? 
C82 C83 C78 119.6(2) . . ? 
C82 C83 C86 118.6(2) . . ? 
C78 C83 C86 121.8(2) . . ? 
C79 C84 H84A 109.5 . . ? 
C79 C84 H84B 109.5 . . ? 
H84A C84 H84B 109.5 . . ? 
C79 C84 H84C 109.5 . . ? 
H84A C84 H84C 109.5 . . ? 
H84B C84 H84C 109.5 . . ? 
C81 C85 H85A 109.5 . . ? 
C81 C85 H85B 109.5 . . ? 
H85A C85 H85B 109.5 . . ? 
C81 C85 H85C 109.5 . . ? 
H85A C85 H85C 109.5 . . ? 
H85B C85 H85C 109.5 . . ? 
C83 C86 H86A 109.5 . . ? 
C83 C86 H86B 109.5 . . ? 
H86A C86 H86B 109.5 . . ? 
C83 C86 H86C 109.5 . . ? 
H86A C86 H86C 109.5 . . ? 
H86B C86 H86C 109.5 . . ? 
N5 P5 C87 122.06(12) . . ? 
N5 P5 C88 106.75(11) . . ? 
C87 P5 C88 110.19(11) . . ? 
N5 P5 C94 110.31(11) . . ? 
C87 P5 C94 106.03(11) . . ? 
C88 P5 C94 99.13(11) . . ? 
N6 P6 C87 119.48(11) . . ? 
N6 P6 C109 107.32(11) . . ? 
C87 P6 C109 111.65(11) . . ? 
N6 P6 C115 110.16(11) . . ? 
C87 P6 C115 106.60(11) . . ? 
C109 P6 C115 99.87(11) . . ? 
C100 N5 P5 124.55(16) . . ? 
C121 N6 P6 125.84(16) . . ? 
P5 C87 P6 133.89(15) . . ? 
P5 C87 H87 113.1 . . ? 
P6 C87 H87 113.1 . . ? 
C89 C88 C93 119.8(2) . . ? 
C89 C88 P5 121.7(2) . . ? 
C93 C88 P5 118.48(19) . . ? 
C90 C89 C88 120.0(3) . . ? 
C90 C89 H89 120.0 . . ? 
C88 C89 H89 120.0 . . ? 
C91 C90 C89 120.1(3) . . ? 
C91 C90 H90 119.9 . . ? 
C89 C90 H90 119.9 . . ? 
C90 C91 C92 120.6(3) . . ? 
C90 C91 H91 119.7 . . ? 
C92 C91 H91 119.7 . . ? 
C91 C92 C93 119.5(3) . . ? 
C91 C92 H92 120.3 . . ? 
C93 C92 H92 120.3 . . ? 
C88 C93 C92 119.9(3) . . ? 
C88 C93 H93 120.0 . . ? 
C92 C93 H93 120.0 . . ? 
C95 C94 C96 119.0(2) . . ? 
C95 C94 P5 122.47(18) . . ? 
C96 C94 P5 118.41(19) . . ? 
C94 C95 C99 120.2(2) . . ? 
C94 C95 H95 119.9 . . ? 
C99 C95 H95 119.9 . . ? 
C97 C96 C94 120.6(3) . . ? 
C97 C96 H96 119.7 . . ? 
C94 C96 H96 119.7 . . ? 
C98 C97 C96 120.1(3) . . ? 
C98 C97 H97 120.0 . . ? 
C96 C97 H97 120.0 . . ? 
C99 C98 C97 119.9(3) . . ? 
C99 C98 H98 120.1 . . ? 
C97 C98 H98 120.1 . . ? 
C98 C99 C95 120.2(3) . . ? 
C98 C99 H99 119.9 . . ? 
C95 C99 H99 119.9 . . ? 
N5 C100 C105 124.3(2) . . ? 
N5 C100 C101 118.9(2) . . ? 
C105 C100 C101 116.6(2) . . ? 
C102 C101 C100 121.2(2) . . ? 
C102 C101 C106 118.2(2) . . ? 
C100 C101 C106 120.5(2) . . ? 
C101 C102 C103 122.0(2) . . ? 
C101 C102 H102 119.0 . . ? 
C103 C102 H102 119.0 . . ? 
C102 C103 C104 117.1(2) . . ? 
C102 C103 C107 120.8(2) . . ? 
C104 C103 C107 122.0(2) . . ? 
C103 C104 C105 122.7(2) . . ? 
C103 C104 H104 118.6 . . ? 
C105 C104 H104 118.6 . . ? 
C104 C105 C100 120.1(2) . . ? 
C104 C105 C108 118.4(2) . . ? 
C100 C105 C108 121.4(2) . . ? 
C101 C106 H10A 109.5 . . ? 
C101 C106 H10B 109.5 . . ? 
H10A C106 H10B 109.5 . . ? 
C101 C106 H10C 109.5 . . ? 
H10A C106 H10C 109.5 . . ? 
H10B C106 H10C 109.5 . . ? 
C103 C107 H10D 109.5 . . ? 
C103 C107 H10E 109.5 . . ? 
H10D C107 H10E 109.5 . . ? 
C103 C107 H10F 109.5 . . ? 
H10D C107 H10F 109.5 . . ? 
H10E C107 H10F 109.5 . . ? 
C105 C108 H10G 109.5 . . ? 
C105 C108 H10H 109.5 . . ? 
H10G C108 H10H 109.5 . . ? 
C105 C108 H10I 109.5 . . ? 
H10G C108 H10I 109.5 . . ? 
H10H C108 H10I 109.5 . . ? 
C110 C109 C114 119.1(2) . . ? 
C110 C109 P6 119.5(2) . . ? 
C114 C109 P6 121.3(2) . . ? 
C109 C110 C111 120.4(3) . . ? 
C109 C110 H110 119.8 . . ? 
C111 C110 H110 119.8 . . ? 
C112 C111 C110 120.4(3) . . ? 
C112 C111 H111 119.8 . . ? 
C110 C111 H111 119.8 . . ? 
C111 C112 C113 119.5(3) . . ? 
C111 C112 H112 120.3 . . ? 
C113 C112 H112 120.3 . . ? 
C112 C113 C114 120.5(3) . . ? 
C112 C113 H113 119.7 . . ? 
C114 C113 H113 119.7 . . ? 
C113 C114 C109 120.0(3) . . ? 
C113 C114 H114 120.0 . . ? 
C109 C114 H114 120.0 . . ? 
C116 C115 C120 118.8(2) . . ? 
C116 C115 P6 120.70(18) . . ? 
C120 C115 P6 120.43(18) . . ? 
C115 C116 C117 121.1(2) . . ? 
C115 C116 H116 119.5 . . ? 
C117 C116 H116 119.5 . . ? 
C118 C117 C116 119.6(2) . . ? 
C118 C117 H117 120.2 . . ? 
C116 C117 H117 120.2 . . ? 
C117 C118 C119 119.7(2) . . ? 
C117 C118 H118 120.1 . . ? 
C119 C118 H118 120.1 . . ? 
C120 C119 C118 120.8(2) . . ? 
C120 C119 H119 119.6 . . ? 
C118 C119 H119 119.6 . . ? 
C119 C120 C115 119.9(2) . . ? 
C119 C120 H120 120.0 . . ? 
C115 C120 H120 120.0 . . ? 
N6 C121 C122 119.3(2) . . ? 
N6 C121 C126 124.1(2) . . ? 
C122 C121 C126 116.5(2) . . ? 
C123 C122 C121 121.2(2) . . ? 
C123 C122 C127 120.2(2) . . ? 
C121 C122 C127 118.6(2) . . ? 
C124 C123 C122 122.3(3) . . ? 
C124 C123 H123 118.8 . . ? 
C122 C123 H123 118.8 . . ? 
C125 C124 C123 116.6(2) . . ? 
C125 C124 C128 121.5(2) . . ? 
C123 C124 C128 121.9(3) . . ? 
C124 C125 C126 123.2(2) . . ? 
C124 C125 H125 118.4 . . ? 
C126 C125 H125 118.4 . . ? 
C125 C126 C121 120.1(2) . . ? 
C125 C126 C129 119.1(2) . . ? 
C121 C126 C129 120.8(2) . . ? 
C122 C127 H12A 109.5 . . ? 
C122 C127 H12B 109.5 . . ? 
H12A C127 H12B 109.5 . . ? 
C122 C127 H12C 109.5 . . ? 
H12A C127 H12C 109.5 . . ? 
H12B C127 H12C 109.5 . . ? 
C124 C128 H12D 109.5 . . ? 
C124 C128 H12E 109.5 . . ? 
H12D C128 H12E 109.5 . . ? 
C124 C128 H12F 109.5 . . ? 
H12D C128 H12F 109.5 . . ? 
H12E C128 H12F 109.5 . . ? 
C126 C129 H12G 109.5 . . ? 
C126 C129 H12H 109.5 . . ? 
H12G C129 H12H 109.5 . . ? 
C126 C129 H12I 109.5 . . ? 
H12G C129 H12I 109.5 . . ? 
H12H C129 H12I 109.5 . . ? 
C131 C130 H13A 109.5 . . ? 
C131 C130 H13B 109.5 . . ? 
H13A C130 H13B 109.5 . . ? 
C131 C130 H13C 109.5 . . ? 
H13A C130 H13C 109.5 . . ? 
H13B C130 H13C 109.5 . . ? 
C136 C131 C132 117.3(3) . . ? 
C136 C131 C130 120.5(3) . . ? 
C132 C131 C130 122.2(3) . . ? 
C133 C132 C131 121.0(3) . . ? 
C133 C132 H132 119.5 . . ? 
C131 C132 H132 119.5 . . ? 
C134 C133 C132 120.4(3) . . ? 
C134 C133 H133 119.8 . . ? 
C132 C133 H133 119.8 . . ? 
C133 C134 C135 119.1(4) . . ? 
C133 C134 H134 120.5 . . ? 
C135 C134 H134 120.5 . . ? 
C136 C135 C134 120.8(3) . . ? 
C136 C135 H135 119.6 . . ? 
C134 C135 H135 119.6 . . ? 
C135 C136 C131 121.4(3) . . ? 
C135 C136 H136 119.3 . . ? 
C131 C136 H136 119.3 . . ? 
C138 C137 H13D 109.5 . . ? 
C138 C137 H13E 109.5 . . ? 
H13D C137 H13E 109.5 . . ? 
C138 C137 H13F 109.5 . . ? 
H13D C137 H13F 109.5 . . ? 
H13E C137 H13F 109.5 . . ? 
C139 C138 C143 117.9(3) . . ? 
C139 C138 C137 121.0(3) . . ? 
C143 C138 C137 121.0(3) . . ? 
C138 C139 C140 120.8(3) . . ? 
C138 C139 H139 119.6 . . ? 
C140 C139 H139 119.6 . . ? 
C141 C140 C139 120.0(3) . . ? 
C141 C140 H140 120.0 . . ? 
C139 C140 H140 120.0 . . ? 
C140 C141 C142 119.9(3) . . ? 
C140 C141 H141 120.0 . . ? 
C142 C141 H141 120.0 . . ? 
C143 C142 C141 119.6(3) . . ? 
C143 C142 H142 120.2 . . ? 
C141 C142 H142 120.2 . . ? 
C142 C143 C138 121.7(3) . . ? 
C142 C143 H143 119.1 . . ? 
C138 C143 H143 119.1 . . ? 
C145 C144 H14A 109.5 . . ? 
C145 C144 H14B 109.5 . . ? 
H14A C144 H14B 109.5 . . ? 
C145 C144 H14C 109.5 . . ? 
H14A C144 H14C 109.5 . . ? 
H14B C144 H14C 109.5 . . ? 
C146 C145 C150 118.3(3) . . ? 
C146 C145 C144 120.9(3) . . ? 
C150 C145 C144 120.8(3) . . ? 
C147 C146 C145 120.8(3) . . ? 
C147 C146 H146 119.6 . . ? 
C145 C146 H146 119.6 . . ? 
C146 C147 C148 120.4(3) . . ? 
C146 C147 H147 119.8 . . ? 
C148 C147 H147 119.8 . . ? 
C149 C148 C147 119.3(3) . . ? 
C149 C148 H148 120.4 . . ? 
C147 C148 H148 120.4 . . ? 
C148 C149 C150 120.6(3) . . ? 
C148 C149 H149 119.7 . . ? 
C150 C149 H149 119.7 . . ? 
C149 C150 C145 120.7(3) . . ? 
C149 C150 H150 119.6 . . ? 
C145 C150 H150 119.6 . . ? 
C152 C151 H15A 109.5 . . ? 
C152 C151 H15B 109.5 . . ? 
H15A C151 H15B 109.5 . . ? 
C152 C151 H15C 109.5 . . ? 
H15A C151 H15C 109.5 . . ? 
H15B C151 H15C 109.5 . . ? 
C153 C152 C157 118.6(3) . . ? 
C153 C152 C151 120.6(3) . . ? 
C157 C152 C151 120.8(3) . . ? 
C154 C153 C152 120.7(3) . . ? 
C154 C153 H153 119.6 . . ? 
C152 C153 H153 119.6 . . ? 
C153 C154 C155 119.8(3) . . ? 
C153 C154 H154 120.1 . . ? 
C155 C154 H154 120.1 . . ? 
C156 C155 C154 118.7(4) . . ? 
C156 C155 H155 120.7 . . ? 
C154 C155 H155 120.7 . . ? 
C157 C156 C155 121.0(3) . . ? 
C157 C156 H156 119.5 . . ? 
C155 C156 H156 119.5 . . ? 
C156 C157 C152 121.2(3) . . ? 
C156 C157 H157 119.4 . . ? 
C152 C157 H157 119.4 . . ? 
 
loop_ 
 _geom_torsion_atom_site_label_1 
 _geom_torsion_atom_site_label_2 
 _geom_torsion_atom_site_label_3 
 _geom_torsion_atom_site_label_4 
 _geom_torsion 
 _geom_torsion_site_symmetry_1 
 _geom_torsion_site_symmetry_2 
 _geom_torsion_site_symmetry_3 
 _geom_torsion_site_symmetry_4 
 _geom_torsion_publ_flag 
C1 P1 N1 C26 -175.65(17) . . . . ? 
C2 P1 N1 C26 -50.5(2) . . . . ? 
C8 P1 N1 C26 67.4(2) . . . . ? 
C1 P1 N1 Dy1 10.97(11) . . . . ? 
C2 P1 N1 Dy1 136.12(9) . . . . ? 
C8 P1 N1 Dy1 -105.94(10) . . . . ? 
N2 Dy1 N1 C26 130.88(19) . . . . ? 
N3 Dy1 N1 C26 -97.08(19) . . . . ? 
N4 Dy1 N1 C26 11.94(19) . . . . ? 
C1 Dy1 N1 C26 179.8(2) . . . . ? 
C44 Dy1 N1 C26 -11.0(3) . . . . ? 
N2 Dy1 N1 P1 -56.65(10) . . . . ? 
N3 Dy1 N1 P1 75.39(10) . . . . ? 
N4 Dy1 N1 P1 -175.59(9) . . . . ? 
C1 Dy1 N1 P1 -7.73(8) . . . . ? 
C44 Dy1 N1 P1 161.46(11) . . . . ? 
C1 P2 N2 C35 -162.24(17) . . . . ? 
C14 P2 N2 C35 72.05(19) . . . . ? 
C20 P2 N2 C35 -43.2(2) . . . . ? 
C1 P2 N2 Dy1 7.00(11) . . . . ? 
C14 P2 N2 Dy1 -118.70(10) . . . . ? 
C20 P2 N2 Dy1 126.05(9) . . . . ? 
N3 Dy1 N2 C35 79.3(2) . . . . ? 
N1 Dy1 N2 C35 -148.48(18) . . . . ? 
N4 Dy1 N2 C35 -45.8(2) . . . . ? 
C1 Dy1 N2 C35 163.0(2) . . . . ? 
C44 Dy1 N2 C35 16.11(19) . . . . ? 
N3 Dy1 N2 P2 -88.68(10) . . . . ? 
N1 Dy1 N2 P2 43.58(10) . . . . ? 
N4 Dy1 N2 P2 146.31(8) . . . . ? 
C1 Dy1 N2 P2 -4.98(8) . . . . ? 
C44 Dy1 N2 P2 -151.83(9) . . . . ? 
C44 P3 N3 C69 -172.09(17) . . . . ? 
C51 P3 N3 C69 -54.2(2) . . . . ? 
C45 P3 N3 C69 63.3(2) . . . . ? 
C44 P3 N3 Dy1 4.24(11) . . . . ? 
C51 P3 N3 Dy1 122.10(9) . . . . ? 
C45 P3 N3 Dy1 -120.37(9) . . . . ? 
N2 Dy1 N3 C69 90.5(2) . . . . ? 
N1 Dy1 N3 C69 -35.9(2) . . . . ? 
N4 Dy1 N3 C69 -138.8(2) . . . . ? 
C1 Dy1 N3 C69 26.9(2) . . . . ? 
C44 Dy1 N3 C69 172.6(2) . . . . ? 
N2 Dy1 N3 P3 -85.05(10) . . . . ? 
N1 Dy1 N3 P3 148.52(8) . . . . ? 
N4 Dy1 N3 P3 45.69(10) . . . . ? 
C1 Dy1 N3 P3 -148.63(9) . . . . ? 
C44 Dy1 N3 P3 -2.98(8) . . . . ? 
C44 P4 N4 C78 -179.17(17) . . . . ? 
C57 P4 N4 C78 62.78(19) . . . . ? 
C63 P4 N4 C78 -52.69(19) . . . . ? 
C44 P4 N4 Dy1 10.47(11) . . . . ? 
C57 P4 N4 Dy1 -107.58(10) . . . . ? 
C63 P4 N4 Dy1 136.95(9) . . . . ? 
N2 Dy1 N4 C78 -94.4(2) . . . . ? 
N3 Dy1 N4 C78 134.62(19) . . . . ? 
N1 Dy1 N4 C78 14.9(2) . . . . ? 
C1 Dy1 N4 C78 -10.8(3) . . . . ? 
C44 Dy1 N4 C78 -176.0(2) . . . . ? 
N2 Dy1 N4 P4 74.23(10) . . . . ? 
N3 Dy1 N4 P4 -56.77(10) . . . . ? 
N1 Dy1 N4 P4 -176.53(9) . . . . ? 
C1 Dy1 N4 P4 157.84(11) . . . . ? 
C44 Dy1 N4 P4 -7.39(7) . . . . ? 
N1 P1 C1 P2 78.10(18) . . . . ? 
C2 P1 C1 P2 -48.7(2) . . . . ? 
C8 P1 C1 P2 -159.47(16) . . . . ? 
N1 P1 C1 Dy1 -9.52(9) . . . . ? 
C2 P1 C1 Dy1 -136.36(9) . . . . ? 
C8 P1 C1 Dy1 112.91(9) . . . . ? 
N2 P2 C1 P1 -93.93(17) . . . . ? 
C14 P2 C1 P1 30.8(2) . . . . ? 
C20 P2 C1 P1 143.73(16) . . . . ? 
N2 P2 C1 Dy1 -5.95(9) . . . . ? 
C14 P2 C1 Dy1 118.82(10) . . . . ? 
C20 P2 C1 Dy1 -128.29(9) . . . . ? 
N2 Dy1 C1 P1 132.72(10) . . . . ? 
N3 Dy1 C1 P1 -110.36(8) . . . . ? 
N1 Dy1 C1 P1 7.10(7) . . . . ? 
N4 Dy1 C1 P1 36.08(19) . . . . ? 
C44 Dy1 C1 P1 -165.41(8) . . . . ? 
N2 Dy1 C1 P2 4.50(7) . . . . ? 
N3 Dy1 C1 P2 121.42(8) . . . . ? 
N1 Dy1 C1 P2 -121.13(10) . . . . ? 
N4 Dy1 C1 P2 -92.15(16) . . . . ? 
C44 Dy1 C1 P2 66.36(13) . . . . ? 
N1 P1 C2 C7 29.2(2) . . . . ? 
C1 P1 C2 C7 149.36(19) . . . . ? 
C8 P1 C2 C7 -96.3(2) . . . . ? 
N1 P1 C2 C3 -154.25(17) . . . . ? 
C1 P1 C2 C3 -34.1(2) . . . . ? 
C8 P1 C2 C3 80.25(19) . . . . ? 
C7 C2 C3 C4 -1.9(3) . . . . ? 
P1 C2 C3 C4 -178.57(18) . . . . ? 
C2 C3 C4 C5 0.3(4) . . . . ? 
C3 C4 C5 C6 1.3(4) . . . . ? 
C4 C5 C6 C7 -1.2(4) . . . . ? 
C5 C6 C7 C2 -0.5(4) . . . . ? 
C3 C2 C7 C6 2.0(3) . . . . ? 
P1 C2 C7 C6 178.46(18) . . . . ? 
N1 P1 C8 C13 77.4(2) . . . . ? 
C1 P1 C8 C13 -37.6(2) . . . . ? 
C2 P1 C8 C13 -156.6(2) . . . . ? 
N1 P1 C8 C9 -99.4(2) . . . . ? 
C1 P1 C8 C9 145.60(19) . . . . ? 
C2 P1 C8 C9 26.6(2) . . . . ? 
C13 C8 C9 C10 -0.9(4) . . . . ? 
P1 C8 C9 C10 175.89(18) . . . . ? 
C8 C9 C10 C11 0.3(4) . . . . ? 
C9 C10 C11 C12 0.7(4) . . . . ? 
C10 C11 C12 C13 -1.0(4) . . . . ? 
C9 C8 C13 C12 0.6(4) . . . . ? 
P1 C8 C13 C12 -176.2(2) . . . . ? 
C11 C12 C13 C8 0.3(4) . . . . ? 
N2 P2 C14 C15 -133.2(2) . . . . ? 
C1 P2 C14 C15 107.5(2) . . . . ? 
C20 P2 C14 C15 -10.3(2) . . . . ? 
N2 P2 C14 C19 50.3(2) . . . . ? 
C1 P2 C14 C19 -68.9(2) . . . . ? 
C20 P2 C14 C19 173.25(19) . . . . ? 
C19 C14 C15 C16 -1.8(4) . . . . ? 
P2 C14 C15 C16 -178.3(2) . . . . ? 
C14 C15 C16 C17 0.4(4) . . . . ? 
C15 C16 C17 C18 1.4(4) . . . . ? 
C16 C17 C18 C19 -1.6(4) . . . . ? 
C17 C18 C19 C14 0.2(4) . . . . ? 
C15 C14 C19 C18 1.5(4) . . . . ? 
P2 C14 C19 C18 178.15(19) . . . . ? 
N2 P2 C20 C25 -134.35(19) . . . . ? 
C1 P2 C20 C25 -18.8(2) . . . . ? 
C14 P2 C20 C25 103.1(2) . . . . ? 
N2 P2 C20 C21 53.2(2) . . . . ? 
C1 P2 C20 C21 168.82(17) . . . . ? 
C14 P2 C20 C21 -69.28(19) . . . . ? 
C25 C20 C21 C22 0.6(3) . . . . ? 
P2 C20 C21 C22 173.32(18) . . . . ? 
C20 C21 C22 C23 -1.6(4) . . . . ? 
C21 C22 C23 C24 1.6(4) . . . . ? 
C22 C23 C24 C25 -0.7(4) . . . . ? 
C21 C20 C25 C24 0.3(4) . . . . ? 
P2 C20 C25 C24 -172.0(2) . . . . ? 
C23 C24 C25 C20 -0.2(4) . . . . ? 
P1 N1 C26 C27 -79.4(2) . . . . ? 
Dy1 N1 C26 C27 91.8(3) . . . . ? 
P1 N1 C26 C31 104.9(2) . . . . ? 
Dy1 N1 C26 C31 -84.0(2) . . . . ? 
C31 C26 C27 C28 -4.3(3) . . . . ? 
N1 C26 C27 C28 180.0(2) . . . . ? 
C31 C26 C27 C32 173.3(2) . . . . ? 
N1 C26 C27 C32 -2.5(3) . . . . ? 
C26 C27 C28 C29 1.7(4) . . . . ? 
C32 C27 C28 C29 -176.0(2) . . . . ? 
C27 C28 C29 C30 1.6(4) . . . . ? 
C27 C28 C29 C33 -179.1(2) . . . . ? 
C28 C29 C30 C31 -2.2(4) . . . . ? 
C33 C29 C30 C31 178.5(2) . . . . ? 
C29 C30 C31 C26 -0.4(4) . . . . ? 
C29 C30 C31 C34 -178.1(2) . . . . ? 
C27 C26 C31 C30 3.6(3) . . . . ? 
N1 C26 C31 C30 179.5(2) . . . . ? 
C27 C26 C31 C34 -178.7(2) . . . . ? 
N1 C26 C31 C34 -2.8(3) . . . . ? 
P2 N2 C35 C40 -92.9(2) . . . . ? 
Dy1 N2 C35 C40 101.2(2) . . . . ? 
P2 N2 C35 C36 90.8(2) . . . . ? 
Dy1 N2 C35 C36 -75.2(3) . . . . ? 
C40 C35 C36 C37 1.1(3) . . . . ? 
N2 C35 C36 C37 177.7(2) . . . . ? 
C40 C35 C36 C41 -179.7(2) . . . . ? 
N2 C35 C36 C41 -3.1(3) . . . . ? 
C35 C36 C37 C38 -0.1(4) . . . . ? 
C41 C36 C37 C38 -179.3(2) . . . . ? 
C36 C37 C38 C39 -0.7(4) . . . . ? 
C36 C37 C38 C42 -179.9(2) . . . . ? 
C37 C38 C39 C40 0.5(4) . . . . ? 
C42 C38 C39 C40 179.7(2) . . . . ? 
C38 C39 C40 C35 0.5(4) . . . . ? 
C38 C39 C40 C43 -178.0(2) . . . . ? 
C36 C35 C40 C39 -1.3(3) . . . . ? 
N2 C35 C40 C39 -177.7(2) . . . . ? 
C36 C35 C40 C43 177.1(2) . . . . ? 
N2 C35 C40 C43 0.7(3) . . . . ? 
N4 P4 C44 P3 78.55(18) . . . . ? 
C57 P4 C44 P3 -158.63(16) . . . . ? 
C63 P4 C44 P3 -48.6(2) . . . . ? 
N4 P4 C44 Dy1 -9.07(9) . . . . ? 
C57 P4 C44 Dy1 113.75(9) . . . . ? 
C63 P4 C44 Dy1 -136.18(9) . . . . ? 
N3 P3 C44 P4 -91.73(18) . . . . ? 
C51 P3 C44 P4 146.05(16) . . . . ? 
C45 P3 C44 P4 32.2(2) . . . . ? 
N3 P3 C44 Dy1 -3.64(9) . . . . ? 
C51 P3 C44 Dy1 -125.85(9) . . . . ? 
C45 P3 C44 Dy1 120.33(9) . . . . ? 
N2 Dy1 C44 P4 -110.53(8) . . . . ? 
N3 Dy1 C44 P4 131.87(10) . . . . ? 
N1 Dy1 C44 P4 32.74(19) . . . . ? 
N4 Dy1 C44 P4 6.76(7) . . . . ? 
C1 Dy1 C44 P4 -162.95(8) . . . . ? 
N2 Dy1 C44 P3 120.33(8) . . . . ? 
N3 Dy1 C44 P3 2.72(7) . . . . ? 
N1 Dy1 C44 P3 -96.41(15) . . . . ? 
N4 Dy1 C44 P3 -122.39(10) . . . . ? 
C1 Dy1 C44 P3 67.90(13) . . . . ? 
N3 P3 C45 C50 -124.9(2) . . . . ? 
C44 P3 C45 C50 115.8(2) . . . . ? 
C51 P3 C45 C50 -0.9(2) . . . . ? 
N3 P3 C45 C46 60.0(2) . . . . ? 
C44 P3 C45 C46 -59.2(2) . . . . ? 
C51 P3 C45 C46 -175.96(19) . . . . ? 
C50 C45 C46 C47 0.2(4) . . . . ? 
P3 C45 C46 C47 175.48(19) . . . . ? 
C45 C46 C47 C48 0.7(4) . . . . ? 
C46 C47 C48 C49 -0.7(4) . . . . ? 
C47 C48 C49 C50 -0.1(4) . . . . ? 
C46 C45 C50 C49 -1.1(4) . . . . ? 
P3 C45 C50 C49 -176.1(2) . . . . ? 
C48 C49 C50 C45 1.0(4) . . . . ? 
N3 P3 C51 C56 -131.79(19) . . . . ? 
C44 P3 C51 C56 -15.9(2) . . . . ? 
C45 P3 C51 C56 105.1(2) . . . . ? 
N3 P3 C51 C52 50.4(2) . . . . ? 
C44 P3 C51 C52 166.32(18) . . . . ? 
C45 P3 C51 C52 -72.7(2) . . . . ? 
C56 C51 C52 C53 2.1(3) . . . . ? 
P3 C51 C52 C53 179.93(18) . . . . ? 
C51 C52 C53 C54 -0.9(4) . . . . ? 
C52 C53 C54 C55 -0.5(4) . . . . ? 
C53 C54 C55 C56 0.8(4) . . . . ? 
C52 C51 C56 C55 -1.9(3) . . . . ? 
P3 C51 C56 C55 -179.61(18) . . . . ? 
C54 C55 C56 C51 0.5(4) . . . . ? 
N4 P4 C57 C58 94.0(2) . . . . ? 
C44 P4 C57 C58 -21.5(2) . . . . ? 
C63 P4 C57 C58 -141.6(2) . . . . ? 
N4 P4 C57 C62 -81.7(2) . . . . ? 
C44 P4 C57 C62 162.80(17) . . . . ? 
C63 P4 C57 C62 42.70(19) . . . . ? 
C62 C57 C58 C59 -0.3(4) . . . . ? 
P4 C57 C58 C59 -175.92(19) . . . . ? 
C57 C58 C59 C60 1.5(4) . . . . ? 
C58 C59 C60 C61 -1.2(4) . . . . ? 
C59 C60 C61 C62 -0.3(4) . . . . ? 
C60 C61 C62 C57 1.5(4) . . . . ? 
C58 C57 C62 C61 -1.2(3) . . . . ? 
P4 C57 C62 C61 174.63(18) . . . . ? 
N4 P4 C63 C68 -155.09(17) . . . . ? 
C44 P4 C63 C68 -34.4(2) . . . . ? 
C57 P4 C63 C68 80.81(19) . . . . ? 
N4 P4 C63 C64 28.2(2) . . . . ? 
C44 P4 C63 C64 148.93(19) . . . . ? 
C57 P4 C63 C64 -95.9(2) . . . . ? 
C68 C63 C64 C65 2.0(3) . . . . ? 
P4 C63 C64 C65 178.58(18) . . . . ? 
C63 C64 C65 C66 0.0(4) . . . . ? 
C64 C65 C66 C67 -1.6(4) . . . . ? 
C65 C66 C67 C68 1.1(4) . . . . ? 
C66 C67 C68 C63 0.9(3) . . . . ? 
C64 C63 C68 C67 -2.5(3) . . . . ? 
P4 C63 C68 C67 -179.29(17) . . . . ? 
P3 N3 C69 C74 -87.5(2) . . . . ? 
Dy1 N3 C69 C74 97.6(2) . . . . ? 
P3 N3 C69 C70 96.2(2) . . . . ? 
Dy1 N3 C69 C70 -78.7(3) . . . . ? 
C74 C69 C70 C71 5.4(3) . . . . ? 
N3 C69 C70 C71 -178.1(2) . . . . ? 
C74 C69 C70 C75 -173.3(2) . . . . ? 
N3 C69 C70 C75 3.1(3) . . . . ? 
C69 C70 C71 C72 -0.8(4) . . . . ? 
C75 C70 C71 C72 178.0(2) . . . . ? 
C70 C71 C72 C73 -3.1(4) . . . . ? 
C70 C71 C72 C76 -179.4(3) . . . . ? 
C71 C72 C73 C74 2.3(4) . . . . ? 
C76 C72 C73 C74 178.6(3) . . . . ? 
C72 C73 C74 C69 2.3(4) . . . . ? 
C72 C73 C74 C77 -173.7(2) . . . . ? 
C70 C69 C74 C73 -6.2(3) . . . . ? 
N3 C69 C74 C73 177.4(2) . . . . ? 
C70 C69 C74 C77 169.6(2) . . . . ? 
N3 C69 C74 C77 -6.8(3) . . . . ? 
P4 N4 C78 C79 -78.0(2) . . . . ? 
Dy1 N4 C78 C79 88.9(3) . . . . ? 
P4 N4 C78 C83 104.7(2) . . . . ? 
Dy1 N4 C78 C83 -88.4(2) . . . . ? 
C83 C78 C79 C80 -5.2(3) . . . . ? 
N4 C78 C79 C80 177.5(2) . . . . ? 
C83 C78 C79 C84 171.3(2) . . . . ? 
N4 C78 C79 C84 -6.0(3) . . . . ? 
C78 C79 C80 C81 2.2(4) . . . . ? 
C84 C79 C80 C81 -174.5(2) . . . . ? 
C79 C80 C81 C82 1.4(4) . . . . ? 
C79 C80 C81 C85 179.3(2) . . . . ? 
C80 C81 C82 C83 -2.0(4) . . . . ? 
C85 C81 C82 C83 -179.8(2) . . . . ? 
C81 C82 C83 C78 -1.1(4) . . . . ? 
C81 C82 C83 C86 -179.9(2) . . . . ? 
C79 C78 C83 C82 4.7(3) . . . . ? 
N4 C78 C83 C82 -178.0(2) . . . . ? 
C79 C78 C83 C86 -176.5(2) . . . . ? 
N4 C78 C83 C86 0.8(3) . . . . ? 
C87 P5 N5 C100 -16.6(2) . . . . ? 
C88 P5 N5 C100 -144.42(19) . . . . ? 
C94 P5 N5 C100 108.8(2) . . . . ? 
C87 P6 N6 C121 -8.3(3) . . . . ? 
C109 P6 N6 C121 -136.7(2) . . . . ? 
C115 P6 N6 C121 115.5(2) . . . . ? 
N5 P5 C87 P6 -88.5(2) . . . . ? 
C88 P5 C87 P6 37.8(2) . . . . ? 
C94 P5 C87 P6 144.2(2) . . . . ? 
N6 P6 C87 P5 -115.7(2) . . . . ? 
C109 P6 C87 P5 10.6(3) . . . . ? 
C115 P6 C87 P5 118.7(2) . . . . ? 
N5 P5 C88 C89 4.1(2) . . . . ? 
C87 P5 C88 C89 -130.5(2) . . . . ? 
C94 P5 C88 C89 118.6(2) . . . . ? 
N5 P5 C88 C93 -172.72(18) . . . . ? 
C87 P5 C88 C93 52.7(2) . . . . ? 
C94 P5 C88 C93 -58.2(2) . . . . ? 
C93 C88 C89 C90 -0.8(4) . . . . ? 
P5 C88 C89 C90 -177.57(19) . . . . ? 
C88 C89 C90 C91 1.5(4) . . . . ? 
C89 C90 C91 C92 -0.9(4) . . . . ? 
C90 C91 C92 C93 -0.4(4) . . . . ? 
C89 C88 C93 C92 -0.5(4) . . . . ? 
P5 C88 C93 C92 176.38(19) . . . . ? 
C91 C92 C93 C88 1.1(4) . . . . ? 
N5 P5 C94 C95 -152.4(2) . . . . ? 
C87 P5 C94 C95 -18.4(2) . . . . ? 
C88 P5 C94 C95 95.8(2) . . . . ? 
N5 P5 C94 C96 30.8(2) . . . . ? 
C87 P5 C94 C96 164.8(2) . . . . ? 
C88 P5 C94 C96 -81.0(2) . . . . ? 
C96 C94 C95 C99 -0.2(4) . . . . ? 
P5 C94 C95 C99 -177.0(2) . . . . ? 
C95 C94 C96 C97 -0.1(4) . . . . ? 
P5 C94 C96 C97 176.8(2) . . . . ? 
C94 C96 C97 C98 0.2(4) . . . . ? 
C96 C97 C98 C99 0.0(5) . . . . ? 
C97 C98 C99 C95 -0.3(5) . . . . ? 
C94 C95 C99 C98 0.4(4) . . . . ? 
P5 N5 C100 C105 -57.1(3) . . . . ? 
P5 N5 C100 C101 126.0(2) . . . . ? 
N5 C100 C101 C102 -179.5(2) . . . . ? 
C105 C100 C101 C102 3.3(3) . . . . ? 
N5 C100 C101 C106 2.8(3) . . . . ? 
C105 C100 C101 C106 -174.4(2) . . . . ? 
C100 C101 C102 C103 -0.6(3) . . . . ? 
C106 C101 C102 C103 177.2(2) . . . . ? 
C101 C102 C103 C104 -1.7(3) . . . . ? 
C101 C102 C103 C107 -179.0(2) . . . . ? 
C102 C103 C104 C105 1.1(3) . . . . ? 
C107 C103 C104 C105 178.4(2) . . . . ? 
C103 C104 C105 C100 1.7(3) . . . . ? 
C103 C104 C105 C108 -175.7(2) . . . . ? 
N5 C100 C105 C104 179.2(2) . . . . ? 
C101 C100 C105 C104 -3.8(3) . . . . ? 
N5 C100 C105 C108 -3.6(3) . . . . ? 
C101 C100 C105 C108 173.47(19) . . . . ? 
N6 P6 C109 C110 3.5(2) . . . . ? 
C87 P6 C109 C110 -129.2(2) . . . . ? 
C115 P6 C109 C110 118.4(2) . . . . ? 
N6 P6 C109 C114 -172.5(2) . . . . ? 
C87 P6 C109 C114 54.8(3) . . . . ? 
C115 P6 C109 C114 -57.6(2) . . . . ? 
C114 C109 C110 C111 -1.6(4) . . . . ? 
P6 C109 C110 C111 -177.6(2) . . . . ? 
C109 C110 C111 C112 0.7(4) . . . . ? 
C110 C111 C112 C113 0.3(5) . . . . ? 
C111 C112 C113 C114 -0.3(5) . . . . ? 
C112 C113 C114 C109 -0.6(5) . . . . ? 
C110 C109 C114 C113 1.5(4) . . . . ? 
P6 C109 C114 C113 177.6(2) . . . . ? 
N6 P6 C115 C116 -156.3(2) . . . . ? 
C87 P6 C115 C116 -25.3(2) . . . . ? 
C109 P6 C115 C116 91.0(2) . . . . ? 
N6 P6 C115 C120 25.6(2) . . . . ? 
C87 P6 C115 C120 156.6(2) . . . . ? 
C109 P6 C115 C120 -87.1(2) . . . . ? 
C120 C115 C116 C117 -2.2(4) . . . . ? 
P6 C115 C116 C117 179.7(2) . . . . ? 
C115 C116 C117 C118 1.3(4) . . . . ? 
C116 C117 C118 C119 0.9(4) . . . . ? 
C117 C118 C119 C120 -2.1(4) . . . . ? 
C118 C119 C120 C115 1.2(4) . . . . ? 
C116 C115 C120 C119 0.9(4) . . . . ? 
P6 C115 C120 C119 179.09(19) . . . . ? 
P6 N6 C121 C122 120.8(2) . . . . ? 
P6 N6 C121 C126 -63.4(3) . . . . ? 
N6 C121 C122 C123 179.1(2) . . . . ? 
C126 C121 C122 C123 3.0(4) . . . . ? 
N6 C121 C122 C127 -2.1(4) . . . . ? 
C126 C121 C122 C127 -178.2(2) . . . . ? 
C121 C122 C123 C124 -1.5(4) . . . . ? 
C127 C122 C123 C124 179.7(3) . . . . ? 
C122 C123 C124 C125 -0.1(4) . . . . ? 
C122 C123 C124 C128 -178.2(3) . . . . ? 
C123 C124 C125 C126 0.1(4) . . . . ? 
C128 C124 C125 C126 178.1(3) . . . . ? 
C124 C125 C126 C121 1.6(4) . . . . ? 
C124 C125 C126 C129 -175.7(2) . . . . ? 
N6 C121 C126 C125 -178.9(2) . . . . ? 
C122 C121 C126 C125 -3.0(3) . . . . ? 
N6 C121 C126 C129 -1.7(3) . . . . ? 
C122 C121 C126 C129 174.2(2) . . . . ? 
C136 C131 C132 C133 -1.6(5) . . . . ? 
C130 C131 C132 C133 178.8(3) . . . . ? 
C131 C132 C133 C134 1.7(5) . . . . ? 
C132 C133 C134 C135 -0.5(5) . . . . ? 
C133 C134 C135 C136 -0.6(5) . . . . ? 
C134 C135 C136 C131 0.6(5) . . . . ? 
C132 C131 C136 C135 0.5(5) . . . . ? 
C130 C131 C136 C135 -180.0(3) . . . . ? 
C143 C138 C139 C140 1.5(4) . . . . ? 
C137 C138 C139 C140 -179.4(2) . . . . ? 
C138 C139 C140 C141 -0.2(4) . . . . ? 
C139 C140 C141 C142 -0.7(4) . . . . ? 
C140 C141 C142 C143 0.2(5) . . . . ? 
C141 C142 C143 C138 1.2(4) . . . . ? 
C139 C138 C143 C142 -2.0(4) . . . . ? 
C137 C138 C143 C142 178.8(3) . . . . ? 
C150 C145 C146 C147 -0.1(5) . . . . ? 
C144 C145 C146 C147 -178.9(4) . . . . ? 
C145 C146 C147 C148 -0.4(5) . . . . ? 
C146 C147 C148 C149 0.6(5) . . . . ? 
C147 C148 C149 C150 -0.1(4) . . . . ? 
C148 C149 C150 C145 -0.4(5) . . . . ? 
C146 C145 C150 C149 0.5(5) . . . . ? 
C144 C145 C150 C149 179.3(4) . . . . ? 
C157 C152 C153 C154 -0.7(5) . . . . ? 
C151 C152 C153 C154 176.8(3) . . . . ? 
C152 C153 C154 C155 0.1(5) . . . . ? 
C153 C154 C155 C156 0.3(6) . . . . ? 
C154 C155 C156 C157 -0.1(6) . . . . ? 
C155 C156 C157 C152 -0.5(6) . . . . ? 
C153 C152 C157 C156 0.9(5) . . . . ? 
C151 C152 C157 C156 -176.6(3) . . . . ? 
 
_diffrn_measured_fraction_theta_max    0.961 
_diffrn_reflns_theta_full              67.50 
_diffrn_measured_fraction_theta_full   0.999 

_refine_diff_density_max    0.68
_refine_diff_density_min   -0.88 
_refine_diff_density_rms    0.07

#=== END
 

 
data_5b
 
_nottingham_internal_coll_name         ERAWLD
_nottingham_internal_coll_number       9221
_nottingham_internal_coll_client       AW/STL
_nottingham_internal_coll_type         sphere
_nottingham_internal_coll_frame_time   '30 s'
_nottingham_internal_coll_frame_width  '0.3 degrees'
_nottingham_internal_coll_frame_method '\w'
_nottingham_internal_coll_user         AW
_nottingham_internal_coll_date         20/03/2010
_nottingham_internal_process_user      AW
_nottingham_internal_process_date      21/03/2010
_nottingham_internal_solution_user     AW
_nottingham_internal_solution_date     21/03/2010	
_nottingham_internal_refinement_user   AW
_nottingham_internal_refinement_date   21/03/2010
_nottingham_internal_validation_user   AJB
_nottingham_internal_validation_date   14/06/2010
_nottingham_internal_archive_date      ?

_refine_special_details
;
Similarity restraints were used to model disorder on two toluene molecules, 
involving the methyl and ortho carbon positions C137-C139/C143 and 
C144-C146/C150.
;

_audit_creation_method           'enCIFer editing of SHELXL97 CIF output'
_chemical_name_systematic 
; 
 ? 
; 
_chemical_name_common             ? 
_chemical_melting_point           ? 
_chemical_formula_moiety         'C86 H86 Er N4 P4, C43 H43 N2 P2, 5(C7 H8)' 
_chemical_formula_sum            'C164 H169 Er N6 P6' 
_chemical_formula_weight          2577.13 
 
loop_ 
 _atom_type_symbol 
 _atom_type_description 
 _atom_type_scat_dispersion_real 
 _atom_type_scat_dispersion_imag 
 _atom_type_scat_source 
 'C'  'C'   0.0033   0.0016 
 'International Tables Vol C Tables 4.2.6.8 and 6.1.1.4' 
 'H'  'H'   0.0000   0.0000 
 'International Tables Vol C Tables 4.2.6.8 and 6.1.1.4' 
 'N'  'N'   0.0061   0.0033 
 'International Tables Vol C Tables 4.2.6.8 and 6.1.1.4' 
 'P'  'P'   0.1023   0.0942 
 'International Tables Vol C Tables 4.2.6.8 and 6.1.1.4' 
 'Er'  'Er'  -0.2586   4.9576 
 'International Tables Vol C Tables 4.2.6.8 and 6.1.1.4' 
 
_symmetry_cell_setting           'triclinic'
_symmetry_space_group_name_H-M   'P -1'
_symmetry_space_group_name_Hall  '-P 1'
 
loop_ 
 _symmetry_equiv_pos_as_xyz 
 'x, y, z' 
 '-x, -y, -z' 
 
_cell_length_a                    16.895(3) 
_cell_length_b                    19.820(4) 
_cell_length_c                    21.149(4) 
_cell_angle_alpha                 76.79(3) 
_cell_angle_beta                  78.76(3) 
_cell_angle_gamma                 83.90(3) 
_cell_volume                      6748(2) 
_cell_formula_units_Z             2 
_cell_measurement_temperature     90(2) 
_cell_measurement_reflns_used     10709 
_cell_measurement_theta_min       2.40 
_cell_measurement_theta_max       27.5
 
_exptl_crystal_description       'COLUMN'
_exptl_crystal_colour            'PALE YELLOW'
_exptl_crystal_size_min           0.04
_exptl_crystal_size_mid           0.05
_exptl_crystal_size_max           0.13 
_exptl_crystal_density_meas       ? 
_exptl_crystal_density_diffrn     1.268 
_exptl_crystal_density_method    'not measured' 
_exptl_crystal_F_000              2706 
_exptl_absorpt_coefficient_mu     0.749 
_exptl_absorpt_correction_type    multi-scan
_exptl_absorpt_correction_T_min   0.61
_exptl_absorpt_correction_T_max   0.746
_exptl_absorpt_process_details   'SADABS 2007/2'
 
_exptl_special_details 
; 
 ? 
; 
 
_diffrn_ambient_temperature       90(2) 
_diffrn_radiation_wavelength      0.71073 
_diffrn_radiation_type            MoK\a 
_diffrn_radiation_source         'normal-focus sealed tube' 
_diffrn_radiation_monochromator   graphite
_diffrn_measurement_device_type  'Bruker SMART APEX CCD diffractometer'
_diffrn_measurement_method       '\w rotation with narrow frames'
_diffrn_detector_area_resol_mean  ?
_diffrn_standards_number          0
_diffrn_standards_interval_count  .
_diffrn_standards_interval_time   ?
_diffrn_standards_decay_%         0
_diffrn_reflns_number             50018 
_diffrn_reflns_av_R_equivalents   0.049 
_diffrn_reflns_av_sigmaI/netI     0.078 
_diffrn_reflns_limit_h_min       -20 
_diffrn_reflns_limit_h_max        20 
_diffrn_reflns_limit_k_min       -23 
_diffrn_reflns_limit_k_max        23 
_diffrn_reflns_limit_l_min       -25 
_diffrn_reflns_limit_l_max        24 
_diffrn_reflns_theta_min          1.95 
_diffrn_reflns_theta_max          25.00 
_reflns_number_total              23655 
_reflns_number_gt                 19011 
_reflns_threshold_expression      I>2\s(I)

_computing_data_collection        'Bruker SMART version 5.625 (Bruker, 2001)' 
_computing_cell_refinement        'Bruker SAINT version 6.36A (Bruker, 2000)' 
_computing_data_reduction         'Bruker SAINT; SHELXTL (Sheldrick, 2008)' 
_computing_structure_solution     'SHELXTL (Sheldrick, 2008)' 
_computing_structure_refinement   'SHELXL97 (Sheldrick, 2008)' 
_computing_molecular_graphics     'SHELXTL (Sheldrick, 2008)' 
 
 
_refine_ls_structure_factor_coef  Fsqd  
_refine_ls_matrix_type            full 
_refine_ls_weighting_scheme       calc  
_refine_ls_weighting_details 
 'calc w=1/[\s^2^(Fo^2^)+(0.054P)^2^+8.226P] where P=(Fo^2^+2Fc^2^)/3' 
_atom_sites_solution_primary      heavy
_atom_sites_solution_secondary    difmap 
_atom_sites_solution_hydrogens   'geom, Me from difmap'
_refine_ls_hydrogen_treatment     constr 
_refine_ls_extinction_method      none 
_refine_ls_extinction_coef        ? 
_refine_ls_number_reflns          23655 
_refine_ls_number_parameters      1617 
_refine_ls_number_restraints      2 
_refine_ls_R_factor_all           0.0761 
_refine_ls_R_factor_gt            0.0577 
_refine_ls_wR_factor_ref          0.134 
_refine_ls_wR_factor_gt           0.127 
_refine_ls_goodness_of_fit_ref    1.11 
_refine_ls_restrained_S_all       1.11 
_refine_ls_shift/su_max           0.002 
_refine_ls_shift/su_mean          0.000 
 
loop_ 
 _atom_site_label 
 _atom_site_type_symbol 
 _atom_site_fract_x 
 _atom_site_fract_y 
 _atom_site_fract_z 
 _atom_site_U_iso_or_equiv 
 _atom_site_adp_type 
 _atom_site_occupancy 
 _atom_site_symmetry_multiplicity 
 _atom_site_calc_flag 
 _atom_site_refinement_flags 
 _atom_site_disorder_assembly 
 _atom_site_disorder_group 
Er1 Er 0.543549(13) 0.731785(11) 0.722824(10) 0.01636(7) Uani 1 1 d . . . 
C1 C 0.6931(3) 0.6892(2) 0.6719(2) 0.0188(10) Uani 1 1 d . . . 
H1 H 0.7027 0.6376 0.6778 0.023 Uiso 1 1 calc R . . 
P1 P 0.73080(7) 0.72405(7) 0.72725(6) 0.0195(3) Uani 1 1 d . . . 
C2 C 0.8208(3) 0.7726(3) 0.6939(2) 0.0223(11) Uani 1 1 d . . . 
C3 C 0.8401(3) 0.8263(3) 0.7189(2) 0.0233(11) Uani 1 1 d . . . 
H3 H 0.8028 0.8431 0.7525 0.028 Uiso 1 1 calc R . . 
C4 C 0.9139(3) 0.8554(3) 0.6949(2) 0.0277(12) Uani 1 1 d . . . 
H4 H 0.9265 0.8929 0.7114 0.033 Uiso 1 1 calc R . . 
C5 C 0.9694(3) 0.8300(3) 0.6470(2) 0.0270(12) Uani 1 1 d . . . 
H5 H 1.0202 0.8498 0.6313 0.032 Uiso 1 1 calc R . . 
C6 C 0.9512(3) 0.7764(3) 0.6220(2) 0.0279(12) Uani 1 1 d . . . 
H6 H 0.9891 0.7596 0.5887 0.034 Uiso 1 1 calc R . . 
C7 C 0.8774(3) 0.7470(3) 0.6455(2) 0.0235(11) Uani 1 1 d . . . 
H7 H 0.8651 0.7095 0.6288 0.028 Uiso 1 1 calc R . . 
C8 C 0.7734(3) 0.6514(3) 0.7830(2) 0.0224(11) Uani 1 1 d . . . 
C9 C 0.7387(3) 0.5870(3) 0.8014(2) 0.0274(12) Uani 1 1 d . . . 
H9 H 0.6930 0.5804 0.7840 0.033 Uiso 1 1 calc R . . 
C10 C 0.7715(3) 0.5326(3) 0.8453(3) 0.0312(13) Uani 1 1 d . . . 
H10 H 0.7474 0.4892 0.8582 0.037 Uiso 1 1 calc R . . 
C11 C 0.8384(3) 0.5410(3) 0.8703(3) 0.0354(14) Uani 1 1 d . . . 
H11 H 0.8611 0.5035 0.8995 0.043 Uiso 1 1 calc R . . 
C12 C 0.8724(3) 0.6046(3) 0.8527(3) 0.0413(15) Uani 1 1 d . . . 
H12 H 0.9179 0.6109 0.8704 0.050 Uiso 1 1 calc R . . 
C13 C 0.8405(3) 0.6588(3) 0.8094(3) 0.0346(13) Uani 1 1 d . . . 
H13 H 0.8648 0.7021 0.7973 0.041 Uiso 1 1 calc R . . 
N1 N 0.6519(2) 0.7676(2) 0.75973(18) 0.0196(9) Uani 1 1 d . . . 
C14 C 0.6580(3) 0.8108(3) 0.8061(2) 0.0218(11) Uani 1 1 d . . . 
C15 C 0.6628(3) 0.7797(3) 0.8723(2) 0.0254(11) Uani 1 1 d . . . 
C16 C 0.6694(3) 0.8222(3) 0.9148(3) 0.0323(13) Uani 1 1 d . . . 
H16 H 0.6735 0.8011 0.9593 0.039 Uiso 1 1 calc R . . 
C17 C 0.6703(3) 0.8938(3) 0.8952(3) 0.0326(13) Uani 1 1 d . . . 
C18 C 0.6632(3) 0.9228(3) 0.8304(2) 0.0277(12) Uani 1 1 d . . . 
H18 H 0.6628 0.9719 0.8159 0.033 Uiso 1 1 calc R . . 
C19 C 0.6566(3) 0.8832(3) 0.7856(2) 0.0244(11) Uani 1 1 d . . . 
C20 C 0.6493(3) 0.9201(3) 0.7163(2) 0.0269(12) Uani 1 1 d . . . 
H20B H 0.7027 0.9200 0.6880 0.040 Uiso 1 1 calc R . . 
H20C H 0.6282 0.9682 0.7160 0.040 Uiso 1 1 calc R . . 
H20A H 0.6124 0.8963 0.6996 0.040 Uiso 1 1 calc R . . 
C21 C 0.6555(3) 0.7036(3) 0.9008(2) 0.0303(12) Uani 1 1 d . . . 
H21A H 0.6336 0.6826 0.8707 0.045 Uiso 1 1 calc R . . 
H21C H 0.6191 0.6972 0.9436 0.045 Uiso 1 1 calc R . . 
H21B H 0.7090 0.6814 0.9066 0.045 Uiso 1 1 calc R . . 
C22 C 0.6759(4) 0.9386(3) 0.9428(3) 0.0485(17) Uani 1 1 d . . . 
H22B H 0.7005 0.9818 0.9184 0.073 Uiso 1 1 calc R . . 
H22C H 0.7092 0.9137 0.9749 0.073 Uiso 1 1 calc R . . 
H22A H 0.6215 0.9496 0.9659 0.073 Uiso 1 1 calc R . . 
P2 P 0.67360(7) 0.73159(6) 0.59405(6) 0.0181(3) Uani 1 1 d . . . 
C23 C 0.7451(3) 0.7960(2) 0.5510(2) 0.0207(11) Uani 1 1 d . . . 
C24 C 0.7452(3) 0.8554(3) 0.5766(2) 0.0241(11) Uani 1 1 d . . . 
H24 H 0.7052 0.8624 0.6132 0.029 Uiso 1 1 calc R . . 
C25 C 0.8018(3) 0.9037(3) 0.5498(2) 0.0255(11) Uani 1 1 d . . . 
H25 H 0.8006 0.9437 0.5676 0.031 Uiso 1 1 calc R . . 
C26 C 0.8608(3) 0.8937(3) 0.4963(3) 0.0273(12) Uani 1 1 d . . . 
H26 H 0.9000 0.9270 0.4774 0.033 Uiso 1 1 calc R . . 
C27 C 0.8626(3) 0.8353(3) 0.4708(2) 0.0283(12) Uani 1 1 d . . . 
H27 H 0.9033 0.8282 0.4346 0.034 Uiso 1 1 calc R . . 
C28 C 0.8052(3) 0.7871(3) 0.4977(2) 0.0241(11) Uani 1 1 d . . . 
H28 H 0.8067 0.7472 0.4796 0.029 Uiso 1 1 calc R . . 
C29 C 0.6883(3) 0.6714(2) 0.5392(2) 0.0189(10) Uani 1 1 d . . . 
C30 C 0.7098(3) 0.6008(2) 0.5589(2) 0.0224(11) Uani 1 1 d . . . 
H30 H 0.7217 0.5829 0.6020 0.027 Uiso 1 1 calc R . . 
C31 C 0.7137(3) 0.5571(3) 0.5159(3) 0.0257(12) Uani 1 1 d . . . 
H31 H 0.7278 0.5089 0.5295 0.031 Uiso 1 1 calc R . . 
C32 C 0.6971(3) 0.5837(3) 0.4528(3) 0.0278(12) Uani 1 1 d . . . 
H32 H 0.6981 0.5533 0.4237 0.033 Uiso 1 1 calc R . . 
C33 C 0.6792(3) 0.6540(3) 0.4320(3) 0.0280(12) Uani 1 1 d . . . 
H33 H 0.6704 0.6723 0.3882 0.034 Uiso 1 1 calc R . . 
C34 C 0.6742(3) 0.6973(3) 0.4748(2) 0.0213(11) Uani 1 1 d . . . 
H34 H 0.6611 0.7455 0.4606 0.026 Uiso 1 1 calc R . . 
N2 N 0.5790(2) 0.76296(19) 0.60787(18) 0.0191(9) Uani 1 1 d . . . 
C35 C 0.5389(3) 0.7887(3) 0.5525(2) 0.0212(11) Uani 1 1 d . . . 
C36 C 0.4978(3) 0.7424(3) 0.5311(2) 0.0224(11) Uani 1 1 d . . . 
C37 C 0.4635(3) 0.7658(3) 0.4741(2) 0.0227(11) Uani 1 1 d . . . 
H37 H 0.4377 0.7336 0.4590 0.027 Uiso 1 1 calc R . . 
C38 C 0.4656(3) 0.8336(3) 0.4391(2) 0.0285(12) Uani 1 1 d . . . 
C39 C 0.5029(3) 0.8791(3) 0.4632(2) 0.0262(12) Uani 1 1 d . . . 
H39 H 0.5035 0.9264 0.4408 0.031 Uiso 1 1 calc R . . 
C40 C 0.5395(3) 0.8585(3) 0.5185(2) 0.0210(10) Uani 1 1 d . . . 
C41 C 0.4880(3) 0.6684(2) 0.5675(2) 0.0228(11) Uani 1 1 d . . . 
H41A H 0.4413 0.6511 0.5565 0.034 Uiso 1 1 calc R . . 
H41C H 0.4795 0.6660 0.6151 0.034 Uiso 1 1 calc R . . 
H41B H 0.5369 0.6398 0.5546 0.034 Uiso 1 1 calc R . . 
C42 C 0.5764(3) 0.9138(3) 0.5390(3) 0.0278(12) Uani 1 1 d . . . 
H42A H 0.6297 0.9224 0.5116 0.042 Uiso 1 1 calc R . . 
H42C H 0.5823 0.8985 0.5854 0.042 Uiso 1 1 calc R . . 
H42B H 0.5414 0.9567 0.5335 0.042 Uiso 1 1 calc R . . 
C43 C 0.4249(4) 0.8579(3) 0.3793(3) 0.0374(14) Uani 1 1 d . . . 
H43A H 0.4273 0.8197 0.3565 0.056 Uiso 1 1 calc R . . 
H43C H 0.4528 0.8969 0.3493 0.056 Uiso 1 1 calc R . . 
H43B H 0.3683 0.8728 0.3934 0.056 Uiso 1 1 calc R . . 
C44 C 0.3864(3) 0.7111(2) 0.7332(2) 0.0203(10) Uani 1 1 d . . . 
H44 H 0.3705 0.7107 0.6902 0.024 Uiso 1 1 calc R . . 
P3 P 0.36037(7) 0.78944(6) 0.75850(6) 0.0197(3) Uani 1 1 d . . . 
C45 C 0.2784(3) 0.7854(3) 0.8290(2) 0.0221(11) Uani 1 1 d . . . 
C46 C 0.2692(3) 0.8276(3) 0.8742(2) 0.0271(12) Uani 1 1 d . . . 
H46 H 0.3079 0.8607 0.8699 0.033 Uiso 1 1 calc R . . 
C47 C 0.2035(3) 0.8219(3) 0.9261(2) 0.0303(13) Uani 1 1 d . . . 
H47 H 0.1976 0.8509 0.9571 0.036 Uiso 1 1 calc R . . 
C48 C 0.1469(3) 0.7741(3) 0.9324(3) 0.0324(13) Uani 1 1 d . . . 
H48 H 0.1033 0.7689 0.9688 0.039 Uiso 1 1 calc R . . 
C49 C 0.1536(3) 0.7338(3) 0.8860(3) 0.0297(12) Uani 1 1 d . . . 
H49 H 0.1136 0.7023 0.8893 0.036 Uiso 1 1 calc R . . 
C50 C 0.2186(3) 0.7398(3) 0.8348(2) 0.0243(11) Uani 1 1 d . . . 
H50 H 0.2228 0.7123 0.8028 0.029 Uiso 1 1 calc R . . 
C51 C 0.3127(3) 0.8467(3) 0.6940(2) 0.0223(11) Uani 1 1 d . . . 
C52 C 0.3453(3) 0.8489(3) 0.6277(2) 0.0261(11) Uani 1 1 d . . . 
H52 H 0.3906 0.8186 0.6162 0.031 Uiso 1 1 calc R . . 
C53 C 0.3123(3) 0.8948(3) 0.5786(3) 0.0323(13) Uani 1 1 d . . . 
H53 H 0.3346 0.8955 0.5336 0.039 Uiso 1 1 calc R . . 
C54 C 0.2470(4) 0.9398(3) 0.5944(3) 0.0369(14) Uani 1 1 d . . . 
H54 H 0.2251 0.9719 0.5604 0.044 Uiso 1 1 calc R . . 
C55 C 0.2135(3) 0.9382(3) 0.6598(3) 0.0371(14) Uani 1 1 d . . . 
H55 H 0.1681 0.9686 0.6708 0.045 Uiso 1 1 calc R . . 
C56 C 0.2466(3) 0.8917(3) 0.7094(3) 0.0302(12) Uani 1 1 d . . . 
H56 H 0.2237 0.8909 0.7543 0.036 Uiso 1 1 calc R . . 
N3 N 0.4464(2) 0.8118(2) 0.76893(19) 0.0211(9) Uani 1 1 d . . . 
C57 C 0.4506(3) 0.8734(3) 0.7943(2) 0.0221(11) Uani 1 1 d . . . 
C58 C 0.4485(3) 0.9407(3) 0.7536(3) 0.0279(12) Uani 1 1 d . . . 
C59 C 0.4506(3) 0.9975(3) 0.7810(3) 0.0338(13) Uani 1 1 d . . . 
H59 H 0.4466 1.0426 0.7539 0.041 Uiso 1 1 calc R . . 
C60 C 0.4583(3) 0.9918(3) 0.8458(3) 0.0356(14) Uani 1 1 d . . . 
C61 C 0.4650(3) 0.9255(3) 0.8838(3) 0.0305(13) Uani 1 1 d . . . 
H61 H 0.4723 0.9200 0.9282 0.037 Uiso 1 1 calc R . . 
C62 C 0.4613(3) 0.8668(3) 0.8598(3) 0.0271(12) Uani 1 1 d . . . 
C63 C 0.4680(3) 0.7963(3) 0.9049(2) 0.0292(12) Uani 1 1 d . . . 
H63B H 0.4139 0.7795 0.9223 0.044 Uiso 1 1 calc R . . 
H63C H 0.4939 0.7998 0.9415 0.044 Uiso 1 1 calc R . . 
H63A H 0.5005 0.7637 0.8801 0.044 Uiso 1 1 calc R . . 
C64 C 0.4467(3) 0.9529(3) 0.6814(3) 0.0319(13) Uani 1 1 d . . . 
H64A H 0.4663 0.9103 0.6655 0.048 Uiso 1 1 calc R . . 
H64C H 0.4815 0.9904 0.6574 0.048 Uiso 1 1 calc R . . 
H64B H 0.3912 0.9659 0.6739 0.048 Uiso 1 1 calc R . . 
C65 C 0.4616(4) 1.0553(3) 0.8728(3) 0.0518(18) Uani 1 1 d . . . 
H65A H 0.4776 1.0944 0.8363 0.078 Uiso 1 1 calc R . . 
H65C H 0.5012 1.0460 0.9025 0.078 Uiso 1 1 calc R . . 
H65B H 0.4082 1.0667 0.8971 0.078 Uiso 1 1 calc R . . 
P4 P 0.40404(7) 0.62860(6) 0.78040(6) 0.0193(3) Uani 1 1 d . . . 
C66 C 0.3469(3) 0.6148(3) 0.8646(2) 0.0222(11) Uani 1 1 d . . . 
C67 C 0.3622(3) 0.6567(3) 0.9046(2) 0.0236(11) Uani 1 1 d . . . 
H67 H 0.4033 0.6887 0.8883 0.028 Uiso 1 1 calc R . . 
C68 C 0.3186(3) 0.6529(3) 0.9680(2) 0.0288(12) Uani 1 1 d . . . 
H68 H 0.3284 0.6832 0.9942 0.035 Uiso 1 1 calc R . . 
C69 C 0.2606(3) 0.6045(3) 0.9930(3) 0.0333(13) Uani 1 1 d . . . 
H69 H 0.2309 0.6011 1.0364 0.040 Uiso 1 1 calc R . . 
C70 C 0.2466(3) 0.5615(3) 0.9544(3) 0.0375(14) Uani 1 1 d . . . 
H70 H 0.2082 0.5273 0.9721 0.045 Uiso 1 1 calc R . . 
C71 C 0.2872(3) 0.5670(3) 0.8899(3) 0.0317(13) Uani 1 1 d . . . 
H71 H 0.2747 0.5385 0.8631 0.038 Uiso 1 1 calc R . . 
C72 C 0.3657(3) 0.5640(2) 0.7473(2) 0.0193(10) Uani 1 1 d . . . 
C73 C 0.3188(3) 0.5820(3) 0.6981(2) 0.0246(11) Uani 1 1 d . . . 
H73 H 0.3091 0.6295 0.6781 0.030 Uiso 1 1 calc R . . 
C74 C 0.2864(3) 0.5306(3) 0.6782(3) 0.0284(12) Uani 1 1 d . . . 
H74 H 0.2556 0.5429 0.6437 0.034 Uiso 1 1 calc R . . 
C75 C 0.2985(3) 0.4612(3) 0.7083(2) 0.0259(11) Uani 1 1 d . . . 
H75 H 0.2751 0.4262 0.6951 0.031 Uiso 1 1 calc R . . 
C76 C 0.3448(3) 0.4432(3) 0.7577(2) 0.0263(12) Uani 1 1 d . . . 
H76 H 0.3533 0.3958 0.7785 0.032 Uiso 1 1 calc R . . 
C77 C 0.3784(3) 0.4939(2) 0.7766(2) 0.0205(10) Uani 1 1 d . . . 
H77 H 0.4108 0.4812 0.8101 0.025 Uiso 1 1 calc R . . 
N4 N 0.5013(2) 0.6211(2) 0.77870(18) 0.0204(9) Uani 1 1 d . . . 
C78 C 0.5397(3) 0.5522(2) 0.8002(2) 0.0194(10) Uani 1 1 d . . . 
C79 C 0.5488(3) 0.5260(3) 0.8663(2) 0.0229(11) Uani 1 1 d . . . 
C80 C 0.5824(3) 0.4582(3) 0.8837(2) 0.0281(12) Uani 1 1 d . . . 
H80 H 0.5870 0.4400 0.9285 0.034 Uiso 1 1 calc R . . 
C81 C 0.6091(3) 0.4166(3) 0.8387(3) 0.0299(12) Uani 1 1 d . . . 
C82 C 0.6020(3) 0.4449(3) 0.7735(2) 0.0257(11) Uani 1 1 d . . . 
H82 H 0.6207 0.4175 0.7414 0.031 Uiso 1 1 calc R . . 
C83 C 0.5686(3) 0.5116(3) 0.7533(2) 0.0235(11) Uani 1 1 d . . . 
C84 C 0.5632(3) 0.5377(3) 0.6815(2) 0.0253(11) Uani 1 1 d . . . 
H84B H 0.5985 0.5077 0.6553 0.038 Uiso 1 1 calc R . . 
H84C H 0.5804 0.5853 0.6669 0.038 Uiso 1 1 calc R . . 
H84A H 0.5073 0.5370 0.6754 0.038 Uiso 1 1 calc R . . 
C85 C 0.5259(3) 0.5675(3) 0.9194(2) 0.0258(11) Uani 1 1 d . . . 
H85B H 0.5194 0.6169 0.8989 0.039 Uiso 1 1 calc R . . 
H85C H 0.5685 0.5603 0.9461 0.039 Uiso 1 1 calc R . . 
H85A H 0.4749 0.5524 0.9475 0.039 Uiso 1 1 calc R . . 
C86 C 0.6465(4) 0.3442(3) 0.8587(3) 0.0436(16) Uani 1 1 d . . . 
H86A H 0.6480 0.3188 0.8237 0.065 Uiso 1 1 calc R . . 
H86B H 0.6141 0.3200 0.8997 0.065 Uiso 1 1 calc R . . 
H86C H 0.7017 0.3467 0.8657 0.065 Uiso 1 1 calc R . . 
C87 C 1.2022(3) 0.7404(3) 0.3990(2) 0.0235(11) Uani 1 1 d . . . 
H87 H 1.2372 0.7723 0.4046 0.028 Uiso 1 1 calc R . . 
P5 P 1.22860(8) 0.65481(7) 0.42655(6) 0.0230(3) Uani 1 1 d . . . 
C88 C 1.1913(3) 0.6057(3) 0.3764(3) 0.0257(11) Uani 1 1 d . . . 
C89 C 1.2050(3) 0.6247(3) 0.3079(2) 0.0277(12) Uani 1 1 d . . . 
H89 H 1.2330 0.6651 0.2865 0.033 Uiso 1 1 calc R . . 
C90 C 1.1784(3) 0.5856(3) 0.2703(3) 0.0326(13) Uani 1 1 d . . . 
H90 H 1.1889 0.5990 0.2235 0.039 Uiso 1 1 calc R . . 
C91 C 1.1369(3) 0.5272(3) 0.3008(3) 0.0324(13) Uani 1 1 d . . . 
H91 H 1.1190 0.5002 0.2752 0.039 Uiso 1 1 calc R . . 
C92 C 1.1217(3) 0.5083(3) 0.3688(3) 0.0313(13) Uani 1 1 d . . . 
H92 H 1.0927 0.4682 0.3898 0.038 Uiso 1 1 calc R . . 
C93 C 1.1480(3) 0.5468(3) 0.4067(3) 0.0289(12) Uani 1 1 d . . . 
H93 H 1.1366 0.5333 0.4535 0.035 Uiso 1 1 calc R . . 
C94 C 1.3394(3) 0.6445(3) 0.4004(3) 0.0270(12) Uani 1 1 d . . . 
C95 C 1.3867(3) 0.5998(3) 0.4404(3) 0.0314(13) Uani 1 1 d . . . 
H95 H 1.3618 0.5741 0.4818 0.038 Uiso 1 1 calc R . . 
C96 C 1.4693(3) 0.5918(3) 0.4212(3) 0.0403(15) Uani 1 1 d . . . 
H96 H 1.5010 0.5607 0.4492 0.048 Uiso 1 1 calc R . . 
C97 C 1.5058(3) 0.6292(3) 0.3610(3) 0.0420(16) Uani 1 1 d . . . 
H97 H 1.5626 0.6231 0.3472 0.050 Uiso 1 1 calc R . . 
C98 C 1.4600(3) 0.6754(3) 0.3209(3) 0.0414(15) Uani 1 1 d . . . 
H98 H 1.4856 0.7013 0.2798 0.050 Uiso 1 1 calc R . . 
C99 C 1.3770(3) 0.6841(3) 0.3403(3) 0.0328(13) Uani 1 1 d . . . 
H99 H 1.3457 0.7167 0.3131 0.039 Uiso 1 1 calc R . . 
N5 N 1.2065(3) 0.6136(2) 0.5009(2) 0.0268(10) Uani 1 1 d . . . 
C100 C 1.1740(3) 0.6368(3) 0.5585(2) 0.0226(11) Uani 1 1 d . . . 
C101 C 1.2016(3) 0.6921(3) 0.5781(2) 0.0267(12) Uani 1 1 d . . . 
C102 C 1.1651(3) 0.7100(3) 0.6378(3) 0.0278(12) Uani 1 1 d . . . 
H10A H 1.1827 0.7490 0.6491 0.033 Uiso 1 1 calc R . . 
C103 C 1.1038(3) 0.6727(3) 0.6814(3) 0.0302(12) Uani 1 1 d . . . 
C104 C 1.0804(3) 0.6163(3) 0.6631(3) 0.0309(13) Uani 1 1 d . . . 
H10B H 1.0395 0.5895 0.6923 0.037 Uiso 1 1 calc R . . 
C105 C 1.1139(3) 0.5971(3) 0.6042(2) 0.0269(12) Uani 1 1 d . . . 
C106 C 1.0909(3) 0.5323(3) 0.5894(3) 0.0329(13) Uani 1 1 d . . . 
H10D H 1.0533 0.5084 0.6273 0.049 Uiso 1 1 calc R . . 
H10E H 1.1395 0.5017 0.5810 0.049 Uiso 1 1 calc R . . 
H10C H 1.0649 0.5442 0.5504 0.049 Uiso 1 1 calc R . . 
C107 C 1.2737(3) 0.7307(3) 0.5398(3) 0.0296(12) Uani 1 1 d . . . 
H10F H 1.3083 0.7016 0.5123 0.044 Uiso 1 1 calc R . . 
H10H H 1.3043 0.7420 0.5705 0.044 Uiso 1 1 calc R . . 
H10G H 1.2554 0.7737 0.5116 0.044 Uiso 1 1 calc R . . 
C108 C 1.0670(3) 0.6923(3) 0.7460(3) 0.0402(15) Uani 1 1 d . . . 
H10I H 1.0081 0.6987 0.7495 0.060 Uiso 1 1 calc R . . 
H10K H 1.0883 0.7357 0.7481 0.060 Uiso 1 1 calc R . . 
H10J H 1.0806 0.6553 0.7825 0.060 Uiso 1 1 calc R . . 
P6 P 1.12124(8) 0.77672(7) 0.36263(6) 0.0225(3) Uani 1 1 d . . . 
C109 C 1.0886(3) 0.8569(2) 0.3924(2) 0.0215(11) Uani 1 1 d . . . 
C110 C 1.1097(3) 0.8691(3) 0.4494(2) 0.0253(11) Uani 1 1 d . . . 
H11A H 1.1366 0.8331 0.4771 0.030 Uiso 1 1 calc R . . 
C111 C 1.0914(3) 0.9332(3) 0.4655(3) 0.0294(12) Uani 1 1 d . . . 
H11B H 1.1064 0.9414 0.5039 0.035 Uiso 1 1 calc R . . 
C112 C 1.0511(3) 0.9859(3) 0.4256(3) 0.0297(12) Uani 1 1 d . . . 
H11C H 1.0401 1.0306 0.4359 0.036 Uiso 1 1 calc R . . 
C113 C 1.0276(3) 0.9726(3) 0.3714(3) 0.0288(12) Uani 1 1 d . . . 
H11D H 0.9978 1.0077 0.3452 0.035 Uiso 1 1 calc R . . 
C114 C 1.0465(3) 0.9089(3) 0.3543(2) 0.0258(11) Uani 1 1 d . . . 
H11E H 1.0305 0.9009 0.3162 0.031 Uiso 1 1 calc R . . 
C115 C 1.0384(3) 0.7209(2) 0.3995(2) 0.0233(11) Uani 1 1 d . . . 
C116 C 0.9920(3) 0.6990(3) 0.3620(3) 0.0312(13) Uani 1 1 d . . . 
H11F H 1.0019 0.7145 0.3153 0.037 Uiso 1 1 calc R . . 
C117 C 0.9304(3) 0.6543(3) 0.3920(3) 0.0331(13) Uani 1 1 d . . . 
H11G H 0.8988 0.6393 0.3659 0.040 Uiso 1 1 calc R . . 
C118 C 0.9157(3) 0.6321(3) 0.4595(3) 0.0327(13) Uani 1 1 d . . . 
H11H H 0.8740 0.6015 0.4799 0.039 Uiso 1 1 calc R . . 
C119 C 0.9610(3) 0.6538(3) 0.4975(3) 0.0287(12) Uani 1 1 d . . . 
H11I H 0.9501 0.6388 0.5442 0.034 Uiso 1 1 calc R . . 
C120 C 1.0225(3) 0.6976(3) 0.4679(2) 0.0257(11) Uani 1 1 d . . . 
H12A H 1.0541 0.7120 0.4944 0.031 Uiso 1 1 calc R . . 
N6 N 1.1217(2) 0.7924(2) 0.2858(2) 0.0254(10) Uani 1 1 d . . . 
C121 C 1.1801(3) 0.8104(2) 0.2305(2) 0.0241(11) Uani 1 1 d . . . 
C122 C 1.1695(3) 0.7900(3) 0.1734(2) 0.0262(12) Uani 1 1 d . . . 
C123 C 1.2249(3) 0.8049(3) 0.1152(2) 0.0307(13) Uani 1 1 d . . . 
H12B H 1.2160 0.7902 0.0775 0.037 Uiso 1 1 calc R . . 
C124 C 1.2925(3) 0.8405(3) 0.1103(2) 0.0320(13) Uani 1 1 d . . . 
C125 C 1.3011(3) 0.8629(3) 0.1655(3) 0.0291(12) Uani 1 1 d . . . 
H12C H 1.3466 0.8885 0.1628 0.035 Uiso 1 1 calc R . . 
C126 C 1.2471(3) 0.8503(3) 0.2249(2) 0.0254(11) Uani 1 1 d . . . 
C127 C 1.2586(3) 0.8849(3) 0.2783(3) 0.0331(13) Uani 1 1 d . . . 
H12D H 1.2099 0.9143 0.2900 0.050 Uiso 1 1 calc R . . 
H12F H 1.3052 0.9136 0.2626 0.050 Uiso 1 1 calc R . . 
H12E H 1.2681 0.8494 0.3172 0.050 Uiso 1 1 calc R . . 
C128 C 1.0964(4) 0.7516(3) 0.1762(3) 0.0358(14) Uani 1 1 d . . . 
H12I H 1.0474 0.7815 0.1855 0.054 Uiso 1 1 calc R . . 
H12H H 1.0954 0.7095 0.2113 0.054 Uiso 1 1 calc R . . 
H12G H 1.0987 0.7388 0.1338 0.054 Uiso 1 1 calc R . . 
C129 C 1.3546(4) 0.8548(3) 0.0473(3) 0.0462(17) Uani 1 1 d . . . 
H12K H 1.4027 0.8232 0.0523 0.069 Uiso 1 1 calc R . . 
H12L H 1.3696 0.9030 0.0383 0.069 Uiso 1 1 calc R . . 
H12J H 1.3314 0.8476 0.0105 0.069 Uiso 1 1 calc R . . 
C130 C 0.1830(6) 0.2594(6) 0.9440(5) 0.114(4) Uani 1 1 d . . . 
H13A H 0.1552 0.2772 0.9063 0.170 Uiso 1 1 calc R . . 
H13C H 0.1526 0.2758 0.9826 0.170 Uiso 1 1 calc R . . 
H13B H 0.1865 0.2085 0.9536 0.170 Uiso 1 1 calc R . . 
C131 C 0.2663(5) 0.2848(5) 0.9278(3) 0.064(2) Uani 1 1 d . . . 
C132 C 0.2766(7) 0.3486(5) 0.9392(4) 0.079(3) Uani 1 1 d . . . 
H13D H 0.2315 0.3772 0.9545 0.095 Uiso 1 1 calc R . . 
C133 C 0.3540(9) 0.3699(6) 0.9279(5) 0.102(4) Uani 1 1 d . . . 
H13E H 0.3624 0.4135 0.9361 0.122 Uiso 1 1 calc R . . 
C134 C 0.4196(7) 0.3289(8) 0.9048(5) 0.098(4) Uani 1 1 d . . . 
H13F H 0.4725 0.3447 0.8969 0.117 Uiso 1 1 calc R . . 
C135 C 0.4086(7) 0.2644(6) 0.8930(4) 0.096(3) Uani 1 1 d . . . 
H13G H 0.4532 0.2357 0.8770 0.115 Uiso 1 1 calc R . . 
C136 C 0.3307(6) 0.2438(5) 0.9053(4) 0.076(3) Uani 1 1 d . . . 
H13H H 0.3217 0.1999 0.8980 0.091 Uiso 1 1 calc R . . 
C137 C 0.0005(7) 0.3959(7) 0.9895(6) 0.170(6) Uani 1 1 d D . . 
H13I H 0.0012 0.4365 1.0084 0.255 Uiso 1 1 calc R . . 
H13J H 0.0363 0.3581 1.0093 0.255 Uiso 1 1 calc R . . 
H13K H -0.0547 0.3807 0.9985 0.255 Uiso 1 1 calc R . . 
C138 C 0.0277(6) 0.4135(5) 0.9202(5) 0.092(3) Uani 1 1 d . . . 
C139 C 0.0816(5) 0.4679(6) 0.8951(5) 0.100(3) Uani 1 1 d D . . 
H13L H 0.1005 0.4915 0.9231 0.120 Uiso 1 1 calc R . . 
C140 C 0.1043(7) 0.4838(5) 0.8278(5) 0.097(3) Uani 1 1 d . . . 
H14A H 0.1399 0.5199 0.8088 0.117 Uiso 1 1 calc R . . 
C141 C 0.0775(6) 0.4490(6) 0.7848(5) 0.093(3) Uani 1 1 d . . . 
H14B H 0.0949 0.4585 0.7384 0.111 Uiso 1 1 calc R . . 
C142 C 0.0294(6) 0.4054(6) 0.8144(8) 0.147(6) Uani 1 1 d . . . 
H14C H 0.0094 0.3821 0.7867 0.176 Uiso 1 1 calc R . . 
C143 C -0.0009(5) 0.3842(5) 0.8805(6) 0.085(3) Uani 1 1 d D . . 
H14K H -0.0400 0.3504 0.8964 0.101 Uiso 1 1 calc R . . 
C144 C 0.9865(4) 0.8702(4) 0.0465(3) 0.064(2) Uani 1 1 d D . . 
H14F H 1.0232 0.8814 0.0727 0.095 Uiso 1 1 calc R . . 
H14E H 1.0115 0.8801 -0.0003 0.095 Uiso 1 1 calc R . . 
H14D H 0.9759 0.8208 0.0608 0.095 Uiso 1 1 calc R . . 
C145 C 0.9076(4) 0.9138(3) 0.0561(3) 0.0420(15) Uani 1 1 d . . . 
C146 C 0.8890(4) 0.9689(3) 0.0074(3) 0.0375(14) Uani 1 1 d D . . 
H14G H 0.9263 0.9794 -0.0328 0.045 Uiso 1 1 calc R . . 
C147 C 0.8183(4) 1.0089(3) 0.0155(3) 0.0403(14) Uani 1 1 d . . . 
H14H H 0.8074 1.0468 -0.0190 0.048 Uiso 1 1 calc R . . 
C148 C 0.7627(4) 0.9951(4) 0.0728(3) 0.0486(17) Uani 1 1 d . . . 
H14I H 0.7134 1.0227 0.0782 0.058 Uiso 1 1 calc R . . 
C149 C 0.7800(5) 0.9404(4) 0.1223(4) 0.061(2) Uani 1 1 d . . . 
H14J H 0.7423 0.9299 0.1624 0.073 Uiso 1 1 calc R . . 
C150 C 0.8520(5) 0.9004(4) 0.1140(3) 0.060(2) Uani 1 1 d D . . 
H15H H 0.8635 0.8630 0.1488 0.072 Uiso 1 1 calc R . . 
C151 C 0.7146(6) 0.8875(4) 0.3482(4) 0.086(3) Uani 1 1 d . . . 
H15B H 0.7184 0.9321 0.3165 0.129 Uiso 1 1 calc R . . 
H15C H 0.7546 0.8833 0.3770 0.129 Uiso 1 1 calc R . . 
H15A H 0.6602 0.8850 0.3749 0.129 Uiso 1 1 calc R . . 
C152 C 0.7303(5) 0.8309(4) 0.3127(4) 0.061(2) Uani 1 1 d . . . 
C153 C 0.8069(5) 0.8009(4) 0.2974(3) 0.0534(18) Uani 1 1 d . . . 
H15 H 0.8508 0.8161 0.3114 0.064 Uiso 1 1 calc R . . 
C154 C 0.8210(5) 0.7488(4) 0.2616(3) 0.066(2) Uani 1 1 d . . . 
H15D H 0.8745 0.7291 0.2513 0.079 Uiso 1 1 calc R . . 
C155 C 0.7599(5) 0.7255(4) 0.2410(3) 0.063(2) Uani 1 1 d . . . 
H15E H 0.7698 0.6901 0.2162 0.076 Uiso 1 1 calc R . . 
C156 C 0.6831(5) 0.7546(4) 0.2570(3) 0.060(2) Uani 1 1 d . . . 
H15F H 0.6399 0.7379 0.2434 0.072 Uiso 1 1 calc R . . 
C157 C 0.6658(5) 0.8065(4) 0.2917(4) 0.062(2) Uani 1 1 d . . . 
H15G H 0.6120 0.8256 0.3014 0.074 Uiso 1 1 calc R . . 
C158 C 0.9349(4) 0.8160(4) 0.8685(3) 0.0558(19) Uani 1 1 d . . . 
H15K H 0.9534 0.7954 0.9103 0.084 Uiso 1 1 calc R . . 
H15J H 0.9643 0.7923 0.8341 0.084 Uiso 1 1 calc R . . 
H15I H 0.8768 0.8107 0.8737 0.084 Uiso 1 1 calc R . . 
C159 C 0.9508(4) 0.8923(3) 0.8489(3) 0.0407(15) Uani 1 1 d . . . 
C160 C 0.8876(4) 0.9431(4) 0.8427(3) 0.0562(19) Uani 1 1 d . . . 
H16A H 0.8334 0.9303 0.8497 0.067 Uiso 1 1 calc R . . 
C161 C 0.9045(6) 1.0116(4) 0.8262(3) 0.065(2) Uani 1 1 d . . . 
H16B H 0.8614 1.0462 0.8211 0.078 Uiso 1 1 calc R . . 
C162 C 0.9817(6) 1.0319(4) 0.8168(3) 0.068(2) Uani 1 1 d . . . 
H16C H 0.9918 1.0798 0.8067 0.081 Uiso 1 1 calc R . . 
C163 C 1.0439(5) 0.9822(4) 0.8223(4) 0.065(2) Uani 1 1 d . . . 
H16D H 1.0979 0.9954 0.8154 0.078 Uiso 1 1 calc R . . 
C164 C 1.0286(4) 0.9135(4) 0.8378(3) 0.0475(16) Uani 1 1 d . . . 
H16E H 1.0724 0.8794 0.8410 0.057 Uiso 1 1 calc R . . 
 
loop_ 
 _atom_site_aniso_label 
 _atom_site_aniso_U_11 
 _atom_site_aniso_U_22 
 _atom_site_aniso_U_33 
 _atom_site_aniso_U_23 
 _atom_site_aniso_U_13 
 _atom_site_aniso_U_12 
Er1 0.01736(12) 0.01501(11) 0.01539(11) -0.00208(8) -0.00142(8) -0.00035(8) 
C1 0.018(2) 0.017(2) 0.018(2) 0.0024(19) -0.0037(19) 0.002(2) 
P1 0.0193(6) 0.0190(7) 0.0187(6) -0.0014(5) -0.0031(5) -0.0011(5) 
C2 0.023(3) 0.024(3) 0.018(2) 0.003(2) -0.006(2) -0.001(2) 
C3 0.020(3) 0.026(3) 0.022(3) -0.004(2) -0.003(2) 0.001(2) 
C4 0.031(3) 0.022(3) 0.029(3) -0.001(2) -0.006(2) -0.007(2) 
C5 0.022(3) 0.025(3) 0.031(3) 0.001(2) -0.004(2) -0.006(2) 
C6 0.021(3) 0.038(3) 0.022(3) -0.004(2) -0.001(2) 0.003(2) 
C7 0.027(3) 0.020(3) 0.022(3) 0.000(2) -0.006(2) 0.001(2) 
C8 0.017(2) 0.028(3) 0.019(2) -0.002(2) 0.0002(19) 0.003(2) 
C9 0.031(3) 0.028(3) 0.023(3) -0.003(2) -0.006(2) -0.003(2) 
C10 0.037(3) 0.020(3) 0.032(3) 0.003(2) -0.006(2) -0.004(2) 
C11 0.028(3) 0.038(3) 0.034(3) 0.006(3) -0.007(2) 0.003(3) 
C12 0.024(3) 0.052(4) 0.041(3) 0.016(3) -0.017(3) -0.009(3) 
C13 0.027(3) 0.037(3) 0.037(3) 0.006(3) -0.010(2) -0.013(3) 
N1 0.022(2) 0.021(2) 0.015(2) -0.0020(17) -0.0049(16) -0.0006(17) 
C14 0.013(2) 0.032(3) 0.021(3) -0.009(2) -0.0005(19) -0.005(2) 
C15 0.021(3) 0.029(3) 0.025(3) -0.005(2) -0.002(2) 0.000(2) 
C16 0.032(3) 0.040(3) 0.025(3) -0.007(2) -0.005(2) -0.003(3) 
C17 0.027(3) 0.043(4) 0.032(3) -0.019(3) -0.001(2) -0.011(3) 
C18 0.026(3) 0.029(3) 0.029(3) -0.012(2) 0.000(2) -0.006(2) 
C19 0.019(3) 0.028(3) 0.025(3) -0.008(2) 0.003(2) -0.002(2) 
C20 0.029(3) 0.023(3) 0.027(3) -0.007(2) -0.001(2) 0.002(2) 
C21 0.031(3) 0.038(3) 0.019(3) -0.002(2) -0.002(2) -0.001(2) 
C22 0.067(4) 0.052(4) 0.032(3) -0.021(3) 0.000(3) -0.019(3) 
P2 0.0207(6) 0.0156(6) 0.0165(6) -0.0018(5) -0.0014(5) -0.0007(5) 
C23 0.021(3) 0.021(3) 0.017(2) 0.005(2) -0.0059(19) -0.004(2) 
C24 0.024(3) 0.025(3) 0.021(3) -0.001(2) -0.003(2) 0.000(2) 
C25 0.030(3) 0.019(3) 0.029(3) -0.006(2) -0.008(2) -0.002(2) 
C26 0.023(3) 0.026(3) 0.031(3) 0.003(2) -0.006(2) -0.007(2) 
C27 0.021(3) 0.034(3) 0.024(3) 0.000(2) 0.002(2) 0.000(2) 
C28 0.025(3) 0.024(3) 0.021(3) -0.002(2) -0.004(2) 0.001(2) 
C29 0.017(2) 0.019(3) 0.020(2) -0.005(2) 0.0001(19) -0.003(2) 
C30 0.022(3) 0.021(3) 0.021(2) 0.001(2) -0.001(2) -0.003(2) 
C31 0.020(3) 0.020(3) 0.037(3) -0.008(2) -0.001(2) -0.002(2) 
C32 0.027(3) 0.031(3) 0.029(3) -0.015(2) -0.001(2) -0.005(2) 
C33 0.031(3) 0.026(3) 0.026(3) -0.002(2) -0.004(2) -0.004(2) 
C34 0.021(3) 0.019(3) 0.022(3) -0.004(2) 0.001(2) -0.001(2) 
N2 0.025(2) 0.0084(19) 0.020(2) -0.0006(16) 0.0025(17) 0.0017(16) 
C35 0.022(3) 0.024(3) 0.018(2) -0.007(2) 0.003(2) -0.005(2) 
C36 0.021(3) 0.021(3) 0.024(3) -0.006(2) 0.002(2) 0.000(2) 
C37 0.025(3) 0.023(3) 0.022(3) -0.007(2) -0.005(2) -0.004(2) 
C38 0.029(3) 0.033(3) 0.023(3) 0.000(2) -0.009(2) -0.003(2) 
C39 0.028(3) 0.019(3) 0.028(3) 0.002(2) -0.006(2) 0.003(2) 
C40 0.022(3) 0.020(3) 0.020(2) 0.000(2) -0.006(2) 0.001(2) 
C41 0.024(3) 0.021(3) 0.025(3) -0.003(2) -0.008(2) -0.002(2) 
C42 0.039(3) 0.017(3) 0.028(3) -0.001(2) -0.013(2) 0.001(2) 
C43 0.052(4) 0.028(3) 0.035(3) 0.004(2) -0.021(3) -0.009(3) 
C44 0.021(3) 0.018(3) 0.019(2) -0.003(2) -0.0014(19) 0.005(2) 
P3 0.0200(6) 0.0183(7) 0.0193(6) -0.0026(5) -0.0021(5) -0.0008(5) 
C45 0.021(3) 0.022(3) 0.018(2) -0.001(2) -0.001(2) 0.007(2) 
C46 0.017(3) 0.034(3) 0.026(3) 0.002(2) -0.004(2) -0.001(2) 
C47 0.030(3) 0.039(3) 0.023(3) -0.013(2) -0.005(2) 0.008(3) 
C48 0.021(3) 0.046(4) 0.027(3) -0.009(3) 0.003(2) 0.004(3) 
C49 0.021(3) 0.035(3) 0.032(3) -0.005(2) -0.002(2) -0.004(2) 
C50 0.020(3) 0.023(3) 0.028(3) -0.005(2) -0.005(2) 0.006(2) 
C51 0.019(3) 0.021(3) 0.028(3) -0.004(2) -0.008(2) 0.001(2) 
C52 0.030(3) 0.024(3) 0.023(3) -0.004(2) -0.003(2) -0.003(2) 
C53 0.039(3) 0.033(3) 0.024(3) -0.002(2) -0.006(2) -0.001(3) 
C54 0.045(4) 0.030(3) 0.035(3) 0.005(3) -0.022(3) 0.001(3) 
C55 0.037(3) 0.031(3) 0.041(3) -0.005(3) -0.013(3) 0.011(3) 
C56 0.035(3) 0.027(3) 0.027(3) -0.005(2) -0.007(2) 0.007(2) 
N3 0.020(2) 0.022(2) 0.021(2) -0.0046(17) -0.0012(17) -0.0029(17) 
C57 0.016(2) 0.028(3) 0.023(3) -0.011(2) 0.000(2) 0.001(2) 
C58 0.023(3) 0.025(3) 0.034(3) -0.007(2) 0.000(2) -0.003(2) 
C59 0.028(3) 0.023(3) 0.045(3) -0.005(3) 0.004(3) -0.004(2) 
C60 0.029(3) 0.031(3) 0.048(4) -0.025(3) 0.015(3) -0.011(2) 
C61 0.025(3) 0.044(4) 0.025(3) -0.015(3) 0.004(2) -0.011(3) 
C62 0.017(3) 0.034(3) 0.031(3) -0.013(2) 0.003(2) -0.005(2) 
C63 0.027(3) 0.040(3) 0.021(3) -0.007(2) -0.002(2) -0.006(2) 
C64 0.036(3) 0.024(3) 0.032(3) 0.001(2) -0.004(2) -0.006(2) 
C65 0.059(4) 0.042(4) 0.057(4) -0.026(3) 0.007(3) -0.017(3) 
P4 0.0209(6) 0.0171(6) 0.0179(6) -0.0010(5) -0.0025(5) -0.0007(5) 
C66 0.020(3) 0.025(3) 0.018(2) 0.002(2) -0.004(2) 0.001(2) 
C67 0.020(3) 0.024(3) 0.023(3) -0.001(2) -0.004(2) 0.004(2) 
C68 0.030(3) 0.028(3) 0.026(3) -0.006(2) -0.002(2) 0.005(2) 
C69 0.038(3) 0.034(3) 0.020(3) 0.000(2) 0.004(2) 0.001(3) 
C70 0.036(3) 0.039(3) 0.033(3) -0.003(3) 0.007(3) -0.015(3) 
C71 0.034(3) 0.036(3) 0.025(3) -0.006(2) -0.002(2) -0.009(3) 
C72 0.015(2) 0.022(3) 0.020(2) -0.005(2) 0.0002(19) -0.002(2) 
C73 0.026(3) 0.021(3) 0.026(3) -0.004(2) -0.004(2) 0.001(2) 
C74 0.025(3) 0.034(3) 0.025(3) -0.004(2) -0.007(2) -0.002(2) 
C75 0.029(3) 0.024(3) 0.027(3) -0.009(2) -0.005(2) -0.004(2) 
C76 0.028(3) 0.021(3) 0.025(3) 0.000(2) 0.002(2) -0.002(2) 
C77 0.021(3) 0.020(3) 0.018(2) 0.000(2) -0.0008(19) -0.004(2) 
N4 0.023(2) 0.022(2) 0.015(2) -0.0048(17) -0.0010(16) 0.0021(18) 
C78 0.017(2) 0.017(2) 0.022(2) 0.001(2) -0.0036(19) -0.001(2) 
C79 0.021(3) 0.022(3) 0.025(3) -0.004(2) -0.005(2) -0.002(2) 
C80 0.033(3) 0.026(3) 0.019(3) 0.004(2) -0.005(2) 0.001(2) 
C81 0.037(3) 0.023(3) 0.027(3) -0.002(2) -0.006(2) 0.004(2) 
C82 0.032(3) 0.018(3) 0.026(3) -0.005(2) -0.002(2) 0.001(2) 
C83 0.015(2) 0.029(3) 0.025(3) -0.003(2) -0.002(2) 0.000(2) 
C84 0.024(3) 0.028(3) 0.022(3) -0.005(2) -0.002(2) 0.000(2) 
C85 0.036(3) 0.023(3) 0.019(3) -0.003(2) -0.010(2) 0.000(2) 
C86 0.061(4) 0.028(3) 0.036(3) -0.003(3) -0.010(3) 0.015(3) 
C87 0.022(3) 0.021(3) 0.027(3) -0.004(2) -0.001(2) -0.005(2) 
P5 0.0217(7) 0.0203(7) 0.0250(7) -0.0042(5) -0.0003(5) -0.0010(5) 
C88 0.018(3) 0.025(3) 0.033(3) -0.006(2) -0.003(2) 0.003(2) 
C89 0.026(3) 0.024(3) 0.030(3) -0.003(2) -0.001(2) -0.001(2) 
C90 0.036(3) 0.032(3) 0.028(3) -0.006(2) -0.002(2) -0.002(3) 
C91 0.034(3) 0.032(3) 0.037(3) -0.018(3) -0.008(2) -0.002(3) 
C92 0.027(3) 0.024(3) 0.040(3) -0.002(2) -0.002(2) -0.004(2) 
C93 0.023(3) 0.031(3) 0.028(3) -0.002(2) -0.002(2) 0.000(2) 
C94 0.021(3) 0.027(3) 0.036(3) -0.016(2) -0.001(2) -0.005(2) 
C95 0.028(3) 0.026(3) 0.045(3) -0.014(3) -0.010(2) 0.000(2) 
C96 0.033(3) 0.039(4) 0.058(4) -0.029(3) -0.010(3) 0.003(3) 
C97 0.022(3) 0.057(4) 0.058(4) -0.040(3) -0.002(3) 0.004(3) 
C98 0.032(3) 0.059(4) 0.037(3) -0.026(3) 0.008(3) -0.012(3) 
C99 0.028(3) 0.038(3) 0.034(3) -0.016(3) 0.002(2) -0.008(3) 
N5 0.028(2) 0.022(2) 0.027(2) 0.0013(18) -0.0035(18) -0.0033(19) 
C100 0.022(3) 0.020(3) 0.023(3) -0.003(2) -0.004(2) 0.004(2) 
C101 0.023(3) 0.027(3) 0.027(3) 0.004(2) -0.008(2) 0.002(2) 
C102 0.023(3) 0.026(3) 0.033(3) -0.006(2) -0.009(2) 0.006(2) 
C103 0.023(3) 0.036(3) 0.028(3) -0.004(2) -0.007(2) 0.010(2) 
C104 0.024(3) 0.032(3) 0.030(3) 0.004(2) -0.003(2) 0.004(2) 
C105 0.021(3) 0.024(3) 0.029(3) 0.004(2) -0.006(2) 0.005(2) 
C106 0.026(3) 0.030(3) 0.036(3) 0.002(2) 0.000(2) -0.002(2) 
C107 0.030(3) 0.031(3) 0.027(3) -0.005(2) -0.008(2) -0.001(2) 
C108 0.035(3) 0.055(4) 0.031(3) -0.014(3) -0.005(3) 0.001(3) 
P6 0.0229(7) 0.0202(7) 0.0222(7) -0.0031(5) 0.0004(5) -0.0027(5) 
C109 0.021(3) 0.016(3) 0.023(3) -0.003(2) 0.005(2) -0.003(2) 
C110 0.023(3) 0.019(3) 0.030(3) -0.001(2) 0.000(2) 0.001(2) 
C111 0.026(3) 0.034(3) 0.029(3) -0.010(2) -0.002(2) -0.002(2) 
C112 0.028(3) 0.022(3) 0.039(3) -0.013(2) 0.004(2) -0.003(2) 
C113 0.026(3) 0.023(3) 0.033(3) 0.001(2) -0.001(2) -0.002(2) 
C114 0.027(3) 0.025(3) 0.022(3) 0.001(2) -0.001(2) -0.007(2) 
C115 0.023(3) 0.014(2) 0.030(3) -0.005(2) 0.002(2) 0.000(2) 
C116 0.028(3) 0.032(3) 0.034(3) -0.008(2) -0.002(2) -0.005(2) 
C117 0.029(3) 0.028(3) 0.043(3) -0.009(3) -0.004(2) -0.006(2) 
C118 0.026(3) 0.024(3) 0.045(3) -0.007(3) 0.005(2) -0.006(2) 
C119 0.024(3) 0.023(3) 0.033(3) -0.005(2) 0.006(2) 0.002(2) 
C120 0.021(3) 0.023(3) 0.029(3) -0.005(2) 0.002(2) 0.002(2) 
N6 0.027(2) 0.025(2) 0.024(2) -0.0052(18) -0.0031(18) -0.0059(19) 
C121 0.025(3) 0.017(3) 0.027(3) 0.001(2) -0.003(2) 0.001(2) 
C122 0.035(3) 0.019(3) 0.023(3) -0.002(2) -0.009(2) 0.004(2) 
C123 0.044(3) 0.022(3) 0.021(3) -0.002(2) -0.004(2) 0.010(3) 
C124 0.037(3) 0.028(3) 0.023(3) -0.001(2) 0.004(2) 0.009(3) 
C125 0.026(3) 0.025(3) 0.031(3) -0.001(2) -0.001(2) 0.003(2) 
C126 0.028(3) 0.022(3) 0.023(3) 0.001(2) -0.004(2) 0.000(2) 
C127 0.033(3) 0.037(3) 0.028(3) -0.002(2) -0.001(2) -0.017(3) 
C128 0.050(4) 0.031(3) 0.028(3) -0.003(2) -0.016(3) -0.004(3) 
C129 0.053(4) 0.045(4) 0.029(3) -0.006(3) 0.013(3) 0.004(3) 
C130 0.091(8) 0.161(11) 0.077(7) 0.007(7) -0.014(6) -0.028(7) 
C131 0.073(5) 0.082(6) 0.031(4) 0.006(4) -0.012(4) -0.021(5) 
C132 0.129(9) 0.064(6) 0.044(5) -0.002(4) -0.034(5) 0.010(6) 
C133 0.152(11) 0.103(9) 0.055(6) 0.033(5) -0.058(7) -0.061(9) 
C134 0.077(7) 0.142(11) 0.057(6) 0.045(6) -0.029(5) -0.041(7) 
C135 0.095(8) 0.119(10) 0.054(5) 0.030(6) -0.015(5) -0.024(7) 
C136 0.097(7) 0.077(6) 0.039(4) 0.009(4) -0.006(4) -0.003(5) 
C137 0.122(10) 0.208(16) 0.129(11) -0.015(11) 0.064(9) 0.011(10) 
C138 0.062(6) 0.084(7) 0.102(8) 0.017(6) -0.004(5) 0.015(5) 
C139 0.064(6) 0.147(10) 0.087(7) -0.002(7) -0.022(5) -0.033(6) 
C140 0.123(9) 0.081(7) 0.097(8) -0.006(6) -0.047(7) -0.021(6) 
C141 0.085(7) 0.108(8) 0.064(6) 0.009(6) -0.007(5) 0.016(6) 
C142 0.066(7) 0.102(9) 0.213(15) 0.048(10) 0.019(8) 0.007(6) 
C143 0.060(6) 0.057(6) 0.141(10) -0.021(6) -0.020(6) -0.017(4) 
C144 0.069(5) 0.060(5) 0.055(4) -0.006(4) -0.017(4) 0.021(4) 
C145 0.059(4) 0.034(3) 0.034(3) -0.007(3) -0.013(3) 0.004(3) 
C146 0.044(4) 0.037(3) 0.033(3) -0.013(3) -0.007(3) 0.001(3) 
C147 0.048(4) 0.034(3) 0.042(4) -0.010(3) -0.012(3) -0.005(3) 
C148 0.040(4) 0.046(4) 0.065(5) -0.026(4) -0.007(3) -0.002(3) 
C149 0.066(5) 0.066(5) 0.048(4) -0.022(4) 0.019(4) -0.025(4) 
C150 0.083(6) 0.053(5) 0.037(4) 0.003(3) -0.006(4) -0.008(4) 
C151 0.111(8) 0.051(5) 0.084(6) 0.004(5) -0.019(5) 0.009(5) 
C152 0.079(6) 0.040(4) 0.050(4) 0.013(3) -0.012(4) 0.003(4) 
C153 0.067(5) 0.049(4) 0.044(4) 0.000(3) -0.018(3) -0.009(4) 
C154 0.079(6) 0.069(5) 0.044(4) 0.008(4) -0.009(4) -0.028(5) 
C155 0.097(6) 0.045(4) 0.041(4) 0.008(3) -0.005(4) -0.022(4) 
C156 0.073(5) 0.050(5) 0.046(4) 0.013(4) -0.009(4) -0.015(4) 
C157 0.072(5) 0.050(5) 0.052(4) 0.020(4) -0.019(4) -0.002(4) 
C158 0.049(4) 0.070(5) 0.050(4) -0.016(4) -0.007(3) -0.003(4) 
C159 0.046(4) 0.050(4) 0.027(3) -0.011(3) -0.009(3) 0.005(3) 
C160 0.049(4) 0.082(6) 0.043(4) -0.026(4) -0.016(3) 0.015(4) 
C161 0.097(7) 0.063(5) 0.037(4) -0.017(4) -0.032(4) 0.040(5) 
C162 0.123(8) 0.043(4) 0.035(4) -0.005(3) -0.019(4) 0.006(5) 
C163 0.077(6) 0.060(5) 0.055(5) -0.003(4) -0.012(4) -0.010(4) 
C164 0.040(4) 0.047(4) 0.049(4) -0.003(3) -0.009(3) 0.008(3) 
 
_geom_special_details 
; 
 All esds (except the esd in the dihedral angle between two l.s. planes) 
 are estimated using the full covariance matrix.  The cell esds are taken 
 into account individually in the estimation of esds in distances, angles 
 and torsion angles; correlations between esds in cell parameters are only 
 used when they are defined by crystal symmetry.  An approximate (isotropic) 
 treatment of cell esds is used for estimating esds involving l.s. planes. 
; 
 
loop_ 
 _geom_bond_atom_site_label_1 
 _geom_bond_atom_site_label_2 
 _geom_bond_distance 
 _geom_bond_site_symmetry_2 
 _geom_bond_publ_flag 
Er1 N2 2.340(4) . ? 
Er1 N4 2.354(4) . ? 
Er1 N1 2.356(4) . ? 
Er1 N3 2.386(4) . ? 
Er1 C1 2.676(5) . ? 
Er1 C44 2.688(5) . ? 
C1 P1 1.734(5) . ? 
C1 P2 1.746(5) . ? 
C1 H1 1.0000 . ? 
P1 N1 1.632(4) . ? 
P1 C8 1.821(5) . ? 
P1 C2 1.822(5) . ? 
C2 C3 1.384(7) . ? 
C2 C7 1.404(7) . ? 
C3 C4 1.384(7) . ? 
C3 H3 0.9500 . ? 
C4 C5 1.386(7) . ? 
C4 H4 0.9500 . ? 
C5 C6 1.376(7) . ? 
C5 H5 0.9500 . ? 
C6 C7 1.385(7) . ? 
C6 H6 0.9500 . ? 
C7 H7 0.9500 . ? 
C8 C13 1.391(7) . ? 
C8 C9 1.404(7) . ? 
C9 C10 1.395(7) . ? 
C9 H9 0.9500 . ? 
C10 C11 1.378(8) . ? 
C10 H10 0.9500 . ? 
C11 C12 1.381(8) . ? 
C11 H11 0.9500 . ? 
C12 C13 1.380(8) . ? 
C12 H12 0.9500 . ? 
C13 H13 0.9500 . ? 
N1 C14 1.464(6) . ? 
C14 C19 1.401(7) . ? 
C14 C15 1.410(7) . ? 
C15 C16 1.391(7) . ? 
C15 C21 1.498(7) . ? 
C16 C17 1.387(8) . ? 
C16 H16 0.9500 . ? 
C17 C18 1.382(8) . ? 
C17 C22 1.508(7) . ? 
C18 C19 1.386(7) . ? 
C18 H18 0.9500 . ? 
C19 C20 1.504(7) . ? 
C20 H20B 0.9800 . ? 
C20 H20C 0.9800 . ? 
C20 H20A 0.9800 . ? 
C21 H21A 0.9800 . ? 
C21 H21C 0.9800 . ? 
C21 H21B 0.9800 . ? 
C22 H22B 0.9800 . ? 
C22 H22C 0.9800 . ? 
C22 H22A 0.9800 . ? 
P2 N2 1.648(4) . ? 
P2 C23 1.813(5) . ? 
P2 C29 1.814(5) . ? 
C23 C28 1.392(6) . ? 
C23 C24 1.402(7) . ? 
C24 C25 1.374(7) . ? 
C24 H24 0.9500 . ? 
C25 C26 1.389(7) . ? 
C25 H25 0.9500 . ? 
C26 C27 1.381(7) . ? 
C26 H26 0.9500 . ? 
C27 C28 1.382(7) . ? 
C27 H27 0.9500 . ? 
C28 H28 0.9500 . ? 
C29 C30 1.396(7) . ? 
C29 C34 1.397(7) . ? 
C30 C31 1.381(7) . ? 
C30 H30 0.9500 . ? 
C31 C32 1.391(7) . ? 
C31 H31 0.9500 . ? 
C32 C33 1.383(7) . ? 
C32 H32 0.9500 . ? 
C33 C34 1.369(7) . ? 
C33 H33 0.9500 . ? 
C34 H34 0.9500 . ? 
N2 C35 1.433(6) . ? 
C35 C40 1.405(7) . ? 
C35 C36 1.407(7) . ? 
C36 C37 1.403(7) . ? 
C36 C41 1.502(7) . ? 
C37 C38 1.380(7) . ? 
C37 H37 0.9500 . ? 
C38 C39 1.387(7) . ? 
C38 C43 1.513(7) . ? 
C39 C40 1.389(7) . ? 
C39 H39 0.9500 . ? 
C40 C42 1.499(7) . ? 
C41 H41A 0.9800 . ? 
C41 H41C 0.9800 . ? 
C41 H41B 0.9800 . ? 
C42 H42A 0.9800 . ? 
C42 H42C 0.9800 . ? 
C42 H42B 0.9800 . ? 
C43 H43A 0.9800 . ? 
C43 H43C 0.9800 . ? 
C43 H43B 0.9800 . ? 
C44 P4 1.740(5) . ? 
C44 P3 1.742(5) . ? 
C44 H44 1.0000 . ? 
P3 N3 1.632(4) . ? 
P3 C45 1.820(5) . ? 
P3 C51 1.824(5) . ? 
C45 C46 1.386(7) . ? 
C45 C50 1.396(7) . ? 
C46 C47 1.394(7) . ? 
C46 H46 0.9500 . ? 
C47 C48 1.385(8) . ? 
C47 H47 0.9500 . ? 
C48 C49 1.382(7) . ? 
C48 H48 0.9500 . ? 
C49 C50 1.377(7) . ? 
C49 H49 0.9500 . ? 
C50 H50 0.9500 . ? 
C51 C56 1.389(7) . ? 
C51 C52 1.396(7) . ? 
C52 C53 1.379(7) . ? 
C52 H52 0.9500 . ? 
C53 C54 1.382(8) . ? 
C53 H53 0.9500 . ? 
C54 C55 1.382(8) . ? 
C54 H54 0.9500 . ? 
C55 C56 1.392(7) . ? 
C55 H55 0.9500 . ? 
C56 H56 0.9500 . ? 
N3 C57 1.454(6) . ? 
C57 C62 1.408(7) . ? 
C57 C58 1.413(7) . ? 
C58 C59 1.387(7) . ? 
C58 C64 1.496(7) . ? 
C59 C60 1.379(8) . ? 
C59 H59 0.9500 . ? 
C60 C61 1.380(8) . ? 
C60 C65 1.506(8) . ? 
C61 C62 1.382(7) . ? 
C61 H61 0.9500 . ? 
C62 C63 1.509(7) . ? 
C63 H63B 0.9800 . ? 
C63 H63C 0.9800 . ? 
C63 H63A 0.9800 . ? 
C64 H64A 0.9800 . ? 
C64 H64C 0.9800 . ? 
C64 H64B 0.9800 . ? 
C65 H65A 0.9800 . ? 
C65 H65C 0.9800 . ? 
C65 H65B 0.9800 . ? 
P4 N4 1.628(4) . ? 
P4 C72 1.820(5) . ? 
P4 C66 1.828(5) . ? 
C66 C67 1.388(7) . ? 
C66 C71 1.401(7) . ? 
C67 C68 1.389(7) . ? 
C67 H67 0.9500 . ? 
C68 C69 1.387(8) . ? 
C68 H68 0.9500 . ? 
C69 C70 1.374(8) . ? 
C69 H69 0.9500 . ? 
C70 C71 1.387(7) . ? 
C70 H70 0.9500 . ? 
C71 H71 0.9500 . ? 
C72 C73 1.388(7) . ? 
C72 C77 1.399(7) . ? 
C73 C74 1.386(7) . ? 
C73 H73 0.9500 . ? 
C74 C75 1.390(7) . ? 
C74 H74 0.9500 . ? 
C75 C76 1.386(7) . ? 
C75 H75 0.9500 . ? 
C76 C77 1.373(7) . ? 
C76 H76 0.9500 . ? 
C77 H77 0.9500 . ? 
N4 C78 1.461(6) . ? 
C78 C83 1.401(7) . ? 
C78 C79 1.409(7) . ? 
C79 C80 1.397(7) . ? 
C79 C85 1.507(7) . ? 
C80 C81 1.379(7) . ? 
C80 H80 0.9500 . ? 
C81 C82 1.389(7) . ? 
C81 C86 1.507(7) . ? 
C82 C83 1.387(7) . ? 
C82 H82 0.9500 . ? 
C83 C84 1.506(7) . ? 
C84 H84B 0.9800 . ? 
C84 H84C 0.9800 . ? 
C84 H84A 0.9800 . ? 
C85 H85B 0.9800 . ? 
C85 H85C 0.9800 . ? 
C85 H85A 0.9800 . ? 
C86 H86A 0.9800 . ? 
C86 H86B 0.9800 . ? 
C86 H86C 0.9800 . ? 
C87 P5 1.705(5) . ? 
C87 P6 1.711(5) . ? 
C87 H87 0.9500 . ? 
P5 N5 1.589(4) . ? 
P5 C88 1.826(5) . ? 
P5 C94 1.849(5) . ? 
C88 C89 1.389(7) . ? 
C88 C93 1.402(7) . ? 
C89 C90 1.389(7) . ? 
C89 H89 0.9500 . ? 
C90 C91 1.379(8) . ? 
C90 H90 0.9500 . ? 
C91 C92 1.379(8) . ? 
C91 H91 0.9500 . ? 
C92 C93 1.384(8) . ? 
C92 H92 0.9500 . ? 
C93 H93 0.9500 . ? 
C94 C95 1.381(8) . ? 
C94 C99 1.403(7) . ? 
C95 C96 1.378(8) . ? 
C95 H95 0.9500 . ? 
C96 C97 1.382(9) . ? 
C96 H96 0.9500 . ? 
C97 C98 1.380(9) . ? 
C97 H97 0.9500 . ? 
C98 C99 1.387(8) . ? 
C98 H98 0.9500 . ? 
C99 H99 0.9500 . ? 
N5 C100 1.392(6) . ? 
C100 C101 1.408(7) . ? 
C100 C105 1.422(7) . ? 
C101 C102 1.399(7) . ? 
C101 C107 1.502(7) . ? 
C102 C103 1.396(7) . ? 
C102 H10A 0.9500 . ? 
C103 C104 1.380(8) . ? 
C103 C108 1.505(7) . ? 
C104 C105 1.384(7) . ? 
C104 H10B 0.9500 . ? 
C105 C106 1.496(8) . ? 
C106 H10D 0.9800 . ? 
C106 H10E 0.9800 . ? 
C106 H10C 0.9800 . ? 
C107 H10F 0.9800 . ? 
C107 H10H 0.9800 . ? 
C107 H10G 0.9800 . ? 
C108 H10I 0.9800 . ? 
C108 H10K 0.9800 . ? 
C108 H10J 0.9800 . ? 
P6 N6 1.582(4) . ? 
P6 C115 1.817(5) . ? 
P6 C109 1.834(5) . ? 
C109 C114 1.381(7) . ? 
C109 C110 1.398(7) . ? 
C110 C111 1.377(7) . ? 
C110 H11A 0.9500 . ? 
C111 C112 1.391(8) . ? 
C111 H11B 0.9500 . ? 
C112 C113 1.372(8) . ? 
C112 H11C 0.9500 . ? 
C113 C114 1.378(7) . ? 
C113 H11D 0.9500 . ? 
C114 H11E 0.9500 . ? 
C115 C116 1.381(7) . ? 
C115 C120 1.395(7) . ? 
C116 C117 1.397(7) . ? 
C116 H11F 0.9500 . ? 
C117 C118 1.373(8) . ? 
C117 H11G 0.9500 . ? 
C118 C119 1.374(8) . ? 
C118 H11H 0.9500 . ? 
C119 C120 1.384(7) . ? 
C119 H11I 0.9500 . ? 
C120 H12A 0.9500 . ? 
N6 C121 1.379(6) . ? 
C121 C122 1.406(7) . ? 
C121 C126 1.420(7) . ? 
C122 C123 1.387(7) . ? 
C122 C128 1.503(7) . ? 
C123 C124 1.382(8) . ? 
C123 H12B 0.9500 . ? 
C124 C125 1.378(8) . ? 
C124 C129 1.518(7) . ? 
C125 C126 1.389(7) . ? 
C125 H12C 0.9500 . ? 
C126 C127 1.501(7) . ? 
C127 H12D 0.9800 . ? 
C127 H12F 0.9800 . ? 
C127 H12E 0.9800 . ? 
C128 H12I 0.9800 . ? 
C128 H12H 0.9800 . ? 
C128 H12G 0.9800 . ? 
C129 H12K 0.9800 . ? 
C129 H12L 0.9800 . ? 
C129 H12J 0.9800 . ? 
C130 C131 1.496(12) . ? 
C130 H13A 0.9800 . ? 
C130 H13C 0.9800 . ? 
C130 H13B 0.9800 . ? 
C131 C136 1.364(11) . ? 
C131 C132 1.374(11) . ? 
C132 C133 1.376(14) . ? 
C132 H13D 0.9500 . ? 
C133 C134 1.380(15) . ? 
C133 H13E 0.9500 . ? 
C134 C135 1.395(15) . ? 
C134 H13F 0.9500 . ? 
C135 C136 1.377(13) . ? 
C135 H13G 0.9500 . ? 
C136 H13H 0.9500 . ? 
C137 C138 1.421(14) . ? 
C137 H13I 0.9800 . ? 
C137 H13J 0.9800 . ? 
C137 H13K 0.9800 . ? 
C138 C143 1.310(13) . ? 
C138 C139 1.425(13) . ? 
C139 C140 1.373(13) . ? 
C139 H13L 0.9500 . ? 
C140 C141 1.421(13) . ? 
C140 H14A 0.9500 . ? 
C141 C142 1.226(13) . ? 
C141 H14B 0.9500 . ? 
C142 C143 1.375(16) . ? 
C142 H14C 0.9500 . ? 
C143 H14K 0.9500 . ? 
C144 C145 1.515(9) . ? 
C144 H14F 0.9800 . ? 
C144 H14E 0.9800 . ? 
C144 H14D 0.9800 . ? 
C145 C146 1.375(8) . ? 
C145 C150 1.382(9) . ? 
C146 C147 1.366(8) . ? 
C146 H14G 0.9500 . ? 
C147 C148 1.373(8) . ? 
C147 H14H 0.9500 . ? 
C148 C149 1.375(10) . ? 
C148 H14I 0.9500 . ? 
C149 C150 1.384(10) . ? 
C149 H14J 0.9500 . ? 
C150 H15H 0.9500 . ? 
C151 C152 1.461(11) . ? 
C151 H15B 0.9800 . ? 
C151 H15C 0.9800 . ? 
C151 H15A 0.9800 . ? 
C152 C153 1.377(10) . ? 
C152 C157 1.421(11) . ? 
C153 C154 1.390(10) . ? 
C153 H15 0.9500 . ? 
C154 C155 1.355(10) . ? 
C154 H15D 0.9500 . ? 
C155 C156 1.374(11) . ? 
C155 H15E 0.9500 . ? 
C156 C157 1.370(10) . ? 
C156 H15F 0.9500 . ? 
C157 H15G 0.9500 . ? 
C158 C159 1.514(9) . ? 
C158 H15K 0.9800 . ? 
C158 H15J 0.9800 . ? 
C158 H15I 0.9800 . ? 
C159 C164 1.381(9) . ? 
C159 C160 1.391(9) . ? 
C160 C161 1.370(11) . ? 
C160 H16A 0.9500 . ? 
C161 C162 1.369(11) . ? 
C161 H16B 0.9500 . ? 
C162 C163 1.365(11) . ? 
C162 H16C 0.9500 . ? 
C163 C164 1.367(10) . ? 
C163 H16D 0.9500 . ? 
C164 H16E 0.9500 . ? 
 
loop_ 
 _geom_angle_atom_site_label_1 
 _geom_angle_atom_site_label_2 
 _geom_angle_atom_site_label_3 
 _geom_angle 
 _geom_angle_site_symmetry_1 
 _geom_angle_site_symmetry_3 
 _geom_angle_publ_flag 
N2 Er1 N4 122.77(13) . . ? 
N2 Er1 N1 103.17(14) . . ? 
N4 Er1 N1 114.63(14) . . ? 
N2 Er1 N3 113.57(13) . . ? 
N4 Er1 N3 105.15(13) . . ? 
N1 Er1 N3 94.02(14) . . ? 
N2 Er1 C1 64.29(14) . . ? 
N4 Er1 C1 96.43(14) . . ? 
N1 Er1 C1 62.75(14) . . ? 
N3 Er1 C1 153.62(14) . . ? 
N2 Er1 C44 99.47(14) . . ? 
N4 Er1 C44 63.31(14) . . ? 
N1 Er1 C44 152.59(14) . . ? 
N3 Er1 C44 62.52(14) . . ? 
C1 Er1 C44 143.02(14) . . ? 
P1 C1 P2 127.4(3) . . ? 
P1 C1 Er1 89.26(18) . . ? 
P2 C1 Er1 88.22(18) . . ? 
P1 C1 H1 114.3 . . ? 
P2 C1 H1 114.3 . . ? 
Er1 C1 H1 114.3 . . ? 
N1 P1 C1 102.9(2) . . ? 
N1 P1 C8 116.5(2) . . ? 
C1 P1 C8 106.8(2) . . ? 
N1 P1 C2 115.5(2) . . ? 
C1 P1 C2 116.1(2) . . ? 
C8 P1 C2 99.4(2) . . ? 
C3 C2 C7 119.4(5) . . ? 
C3 C2 P1 123.9(4) . . ? 
C7 C2 P1 116.1(4) . . ? 
C4 C3 C2 119.9(5) . . ? 
C4 C3 H3 120.1 . . ? 
C2 C3 H3 120.1 . . ? 
C3 C4 C5 120.4(5) . . ? 
C3 C4 H4 119.8 . . ? 
C5 C4 H4 119.8 . . ? 
C6 C5 C4 120.3(5) . . ? 
C6 C5 H5 119.8 . . ? 
C4 C5 H5 119.8 . . ? 
C5 C6 C7 119.8(5) . . ? 
C5 C6 H6 120.1 . . ? 
C7 C6 H6 120.1 . . ? 
C6 C7 C2 120.2(5) . . ? 
C6 C7 H7 119.9 . . ? 
C2 C7 H7 119.9 . . ? 
C13 C8 C9 118.3(5) . . ? 
C13 C8 P1 120.7(4) . . ? 
C9 C8 P1 121.0(4) . . ? 
C10 C9 C8 119.8(5) . . ? 
C10 C9 H9 120.1 . . ? 
C8 C9 H9 120.1 . . ? 
C11 C10 C9 120.8(5) . . ? 
C11 C10 H10 119.6 . . ? 
C9 C10 H10 119.6 . . ? 
C10 C11 C12 119.5(5) . . ? 
C10 C11 H11 120.2 . . ? 
C12 C11 H11 120.2 . . ? 
C13 C12 C11 120.3(5) . . ? 
C13 C12 H12 119.8 . . ? 
C11 C12 H12 119.8 . . ? 
C12 C13 C8 121.2(5) . . ? 
C12 C13 H13 119.4 . . ? 
C8 C13 H13 119.4 . . ? 
C14 N1 P1 121.5(3) . . ? 
C14 N1 Er1 134.4(3) . . ? 
P1 N1 Er1 103.76(19) . . ? 
C19 C14 C15 119.4(5) . . ? 
C19 C14 N1 120.5(4) . . ? 
C15 C14 N1 120.1(4) . . ? 
C16 C15 C14 118.6(5) . . ? 
C16 C15 C21 117.8(5) . . ? 
C14 C15 C21 123.5(5) . . ? 
C17 C16 C15 122.9(5) . . ? 
C17 C16 H16 118.6 . . ? 
C15 C16 H16 118.6 . . ? 
C18 C17 C16 117.1(5) . . ? 
C18 C17 C22 121.2(5) . . ? 
C16 C17 C22 121.7(5) . . ? 
C17 C18 C19 122.7(5) . . ? 
C17 C18 H18 118.7 . . ? 
C19 C18 H18 118.7 . . ? 
C18 C19 C14 119.3(5) . . ? 
C18 C19 C20 118.3(5) . . ? 
C14 C19 C20 122.4(4) . . ? 
C19 C20 H20B 109.5 . . ? 
C19 C20 H20C 109.5 . . ? 
H20B C20 H20C 109.5 . . ? 
C19 C20 H20A 109.5 . . ? 
H20B C20 H20A 109.5 . . ? 
H20C C20 H20A 109.5 . . ? 
C15 C21 H21A 109.5 . . ? 
C15 C21 H21C 109.5 . . ? 
H21A C21 H21C 109.5 . . ? 
C15 C21 H21B 109.5 . . ? 
H21A C21 H21B 109.5 . . ? 
H21C C21 H21B 109.5 . . ? 
C17 C22 H22B 109.5 . . ? 
C17 C22 H22C 109.5 . . ? 
H22B C22 H22C 109.5 . . ? 
C17 C22 H22A 109.5 . . ? 
H22B C22 H22A 109.5 . . ? 
H22C C22 H22A 109.5 . . ? 
N2 P2 C1 104.5(2) . . ? 
N2 P2 C23 114.3(2) . . ? 
C1 P2 C23 113.3(2) . . ? 
N2 P2 C29 112.2(2) . . ? 
C1 P2 C29 110.6(2) . . ? 
C23 P2 C29 102.2(2) . . ? 
C28 C23 C24 117.7(4) . . ? 
C28 C23 P2 123.8(4) . . ? 
C24 C23 P2 118.3(4) . . ? 
C25 C24 C23 121.5(4) . . ? 
C25 C24 H24 119.3 . . ? 
C23 C24 H24 119.3 . . ? 
C24 C25 C26 119.6(5) . . ? 
C24 C25 H25 120.2 . . ? 
C26 C25 H25 120.2 . . ? 
C27 C26 C25 120.0(5) . . ? 
C27 C26 H26 120.0 . . ? 
C25 C26 H26 120.0 . . ? 
C26 C27 C28 120.1(5) . . ? 
C26 C27 H27 120.0 . . ? 
C28 C27 H27 120.0 . . ? 
C27 C28 C23 121.1(5) . . ? 
C27 C28 H28 119.4 . . ? 
C23 C28 H28 119.4 . . ? 
C30 C29 C34 119.2(4) . . ? 
C30 C29 P2 123.2(4) . . ? 
C34 C29 P2 117.6(4) . . ? 
C31 C30 C29 119.9(5) . . ? 
C31 C30 H30 120.0 . . ? 
C29 C30 H30 120.0 . . ? 
C30 C31 C32 119.9(5) . . ? 
C30 C31 H31 120.0 . . ? 
C32 C31 H31 120.0 . . ? 
C33 C32 C31 120.4(5) . . ? 
C33 C32 H32 119.8 . . ? 
C31 C32 H32 119.8 . . ? 
C34 C33 C32 119.8(5) . . ? 
C34 C33 H33 120.1 . . ? 
C32 C33 H33 120.1 . . ? 
C33 C34 C29 120.7(5) . . ? 
C33 C34 H34 119.6 . . ? 
C29 C34 H34 119.6 . . ? 
C35 N2 P2 118.3(3) . . ? 
C35 N2 Er1 137.7(3) . . ? 
P2 N2 Er1 102.93(19) . . ? 
C40 C35 C36 118.7(5) . . ? 
C40 C35 N2 122.5(4) . . ? 
C36 C35 N2 118.8(4) . . ? 
C37 C36 C35 119.3(5) . . ? 
C37 C36 C41 118.1(4) . . ? 
C35 C36 C41 122.6(4) . . ? 
C38 C37 C36 122.5(5) . . ? 
C38 C37 H37 118.7 . . ? 
C36 C37 H37 118.7 . . ? 
C37 C38 C39 117.0(5) . . ? 
C37 C38 C43 121.2(5) . . ? 
C39 C38 C43 121.8(5) . . ? 
C38 C39 C40 123.0(5) . . ? 
C38 C39 H39 118.5 . . ? 
C40 C39 H39 118.5 . . ? 
C39 C40 C35 119.4(5) . . ? 
C39 C40 C42 116.8(4) . . ? 
C35 C40 C42 123.8(4) . . ? 
C36 C41 H41A 109.5 . . ? 
C36 C41 H41C 109.5 . . ? 
H41A C41 H41C 109.5 . . ? 
C36 C41 H41B 109.5 . . ? 
H41A C41 H41B 109.5 . . ? 
H41C C41 H41B 109.5 . . ? 
C40 C42 H42A 109.5 . . ? 
C40 C42 H42C 109.5 . . ? 
H42A C42 H42C 109.5 . . ? 
C40 C42 H42B 109.5 . . ? 
H42A C42 H42B 109.5 . . ? 
H42C C42 H42B 109.5 . . ? 
C38 C43 H43A 109.5 . . ? 
C38 C43 H43C 109.5 . . ? 
H43A C43 H43C 109.5 . . ? 
C38 C43 H43B 109.5 . . ? 
H43A C43 H43B 109.5 . . ? 
H43C C43 H43B 109.5 . . ? 
P4 C44 P3 129.1(3) . . ? 
P4 C44 Er1 88.39(19) . . ? 
P3 C44 Er1 89.6(2) . . ? 
P4 C44 H44 113.6 . . ? 
P3 C44 H44 113.6 . . ? 
Er1 C44 H44 113.6 . . ? 
N3 P3 C44 103.3(2) . . ? 
N3 P3 C45 115.6(2) . . ? 
C44 P3 C45 114.3(2) . . ? 
N3 P3 C51 116.6(2) . . ? 
C44 P3 C51 106.2(2) . . ? 
C45 P3 C51 100.9(2) . . ? 
C46 C45 C50 118.5(4) . . ? 
C46 C45 P3 124.2(4) . . ? 
C50 C45 P3 117.2(4) . . ? 
C45 C46 C47 120.3(5) . . ? 
C45 C46 H46 119.9 . . ? 
C47 C46 H46 119.9 . . ? 
C48 C47 C46 120.0(5) . . ? 
C48 C47 H47 120.0 . . ? 
C46 C47 H47 120.0 . . ? 
C49 C48 C47 120.1(5) . . ? 
C49 C48 H48 119.9 . . ? 
C47 C48 H48 119.9 . . ? 
C50 C49 C48 119.5(5) . . ? 
C50 C49 H49 120.2 . . ? 
C48 C49 H49 120.2 . . ? 
C49 C50 C45 121.4(5) . . ? 
C49 C50 H50 119.3 . . ? 
C45 C50 H50 119.3 . . ? 
C56 C51 C52 118.6(5) . . ? 
C56 C51 P3 121.1(4) . . ? 
C52 C51 P3 120.1(4) . . ? 
C53 C52 C51 120.6(5) . . ? 
C53 C52 H52 119.7 . . ? 
C51 C52 H52 119.7 . . ? 
C52 C53 C54 120.4(5) . . ? 
C52 C53 H53 119.8 . . ? 
C54 C53 H53 119.8 . . ? 
C55 C54 C53 120.0(5) . . ? 
C55 C54 H54 120.0 . . ? 
C53 C54 H54 120.0 . . ? 
C54 C55 C56 119.7(5) . . ? 
C54 C55 H55 120.1 . . ? 
C56 C55 H55 120.1 . . ? 
C51 C56 C55 120.8(5) . . ? 
C51 C56 H56 119.6 . . ? 
C55 C56 H56 119.6 . . ? 
C57 N3 P3 121.1(3) . . ? 
C57 N3 Er1 134.9(3) . . ? 
P3 N3 Er1 103.58(19) . . ? 
C62 C57 C58 118.2(5) . . ? 
C62 C57 N3 120.2(4) . . ? 
C58 C57 N3 121.6(4) . . ? 
C59 C58 C57 118.9(5) . . ? 
C59 C58 C64 118.6(5) . . ? 
C57 C58 C64 122.5(5) . . ? 
C60 C59 C58 123.3(5) . . ? 
C60 C59 H59 118.3 . . ? 
C58 C59 H59 118.3 . . ? 
C59 C60 C61 117.0(5) . . ? 
C59 C60 C65 121.1(6) . . ? 
C61 C60 C65 122.0(6) . . ? 
C60 C61 C62 122.5(5) . . ? 
C60 C61 H61 118.8 . . ? 
C62 C61 H61 118.8 . . ? 
C61 C62 C57 120.0(5) . . ? 
C61 C62 C63 119.2(5) . . ? 
C57 C62 C63 120.8(5) . . ? 
C62 C63 H63B 109.5 . . ? 
C62 C63 H63C 109.5 . . ? 
H63B C63 H63C 109.5 . . ? 
C62 C63 H63A 109.5 . . ? 
H63B C63 H63A 109.5 . . ? 
H63C C63 H63A 109.5 . . ? 
C58 C64 H64A 109.5 . . ? 
C58 C64 H64C 109.5 . . ? 
H64A C64 H64C 109.5 . . ? 
C58 C64 H64B 109.5 . . ? 
H64A C64 H64B 109.5 . . ? 
H64C C64 H64B 109.5 . . ? 
C60 C65 H65A 109.5 . . ? 
C60 C65 H65C 109.5 . . ? 
H65A C65 H65C 109.5 . . ? 
C60 C65 H65B 109.5 . . ? 
H65A C65 H65B 109.5 . . ? 
H65C C65 H65B 109.5 . . ? 
N4 P4 C44 104.4(2) . . ? 
N4 P4 C72 114.9(2) . . ? 
C44 P4 C72 109.9(2) . . ? 
N4 P4 C66 112.2(2) . . ? 
C44 P4 C66 113.8(2) . . ? 
C72 P4 C66 102.0(2) . . ? 
C67 C66 C71 118.7(4) . . ? 
C67 C66 P4 117.0(4) . . ? 
C71 C66 P4 124.3(4) . . ? 
C66 C67 C68 121.2(5) . . ? 
C66 C67 H67 119.4 . . ? 
C68 C67 H67 119.4 . . ? 
C69 C68 C67 119.6(5) . . ? 
C69 C68 H68 120.2 . . ? 
C67 C68 H68 120.2 . . ? 
C70 C69 C68 119.6(5) . . ? 
C70 C69 H69 120.2 . . ? 
C68 C69 H69 120.2 . . ? 
C69 C70 C71 121.3(5) . . ? 
C69 C70 H70 119.4 . . ? 
C71 C70 H70 119.4 . . ? 
C70 C71 C66 119.5(5) . . ? 
C70 C71 H71 120.2 . . ? 
C66 C71 H71 120.2 . . ? 
C73 C72 C77 119.1(5) . . ? 
C73 C72 P4 122.4(4) . . ? 
C77 C72 P4 118.2(4) . . ? 
C74 C73 C72 119.8(5) . . ? 
C74 C73 H73 120.1 . . ? 
C72 C73 H73 120.1 . . ? 
C73 C74 C75 120.5(5) . . ? 
C73 C74 H74 119.7 . . ? 
C75 C74 H74 119.7 . . ? 
C76 C75 C74 119.6(5) . . ? 
C76 C75 H75 120.2 . . ? 
C74 C75 H75 120.2 . . ? 
C77 C76 C75 120.0(5) . . ? 
C77 C76 H76 120.0 . . ? 
C75 C76 H76 120.0 . . ? 
C76 C77 C72 120.8(5) . . ? 
C76 C77 H77 119.6 . . ? 
C72 C77 H77 119.6 . . ? 
C78 N4 P4 118.7(3) . . ? 
C78 N4 Er1 136.9(3) . . ? 
P4 N4 Er1 103.58(19) . . ? 
C83 C78 C79 119.4(4) . . ? 
C83 C78 N4 118.7(4) . . ? 
C79 C78 N4 121.8(4) . . ? 
C80 C79 C78 118.4(4) . . ? 
C80 C79 C85 118.0(4) . . ? 
C78 C79 C85 123.6(4) . . ? 
C81 C80 C79 123.0(5) . . ? 
C81 C80 H80 118.5 . . ? 
C79 C80 H80 118.5 . . ? 
C80 C81 C82 117.1(5) . . ? 
C80 C81 C86 121.8(5) . . ? 
C82 C81 C86 121.1(5) . . ? 
C83 C82 C81 122.6(5) . . ? 
C83 C82 H82 118.7 . . ? 
C81 C82 H82 118.7 . . ? 
C82 C83 C78 119.3(5) . . ? 
C82 C83 C84 118.8(4) . . ? 
C78 C83 C84 121.9(4) . . ? 
C83 C84 H84B 109.5 . . ? 
C83 C84 H84C 109.5 . . ? 
H84B C84 H84C 109.5 . . ? 
C83 C84 H84A 109.5 . . ? 
H84B C84 H84A 109.5 . . ? 
H84C C84 H84A 109.5 . . ? 
C79 C85 H85B 109.5 . . ? 
C79 C85 H85C 109.5 . . ? 
H85B C85 H85C 109.5 . . ? 
C79 C85 H85A 109.5 . . ? 
H85B C85 H85A 109.5 . . ? 
H85C C85 H85A 109.5 . . ? 
C81 C86 H86A 109.5 . . ? 
C81 C86 H86B 109.5 . . ? 
H86A C86 H86B 109.5 . . ? 
C81 C86 H86C 109.5 . . ? 
H86A C86 H86C 109.5 . . ? 
H86B C86 H86C 109.5 . . ? 
P5 C87 P6 128.7(3) . . ? 
P5 C87 H87 115.6 . . ? 
P6 C87 H87 115.6 . . ? 
N5 P5 C87 124.6(2) . . ? 
N5 P5 C88 106.3(2) . . ? 
C87 P5 C88 107.6(2) . . ? 
N5 P5 C94 108.1(2) . . ? 
C87 P5 C94 105.9(2) . . ? 
C88 P5 C94 102.3(2) . . ? 
C89 C88 C93 118.2(5) . . ? 
C89 C88 P5 121.8(4) . . ? 
C93 C88 P5 120.1(4) . . ? 
C90 C89 C88 121.1(5) . . ? 
C90 C89 H89 119.4 . . ? 
C88 C89 H89 119.4 . . ? 
C91 C90 C89 120.0(5) . . ? 
C91 C90 H90 120.0 . . ? 
C89 C90 H90 120.0 . . ? 
C90 C91 C92 119.6(5) . . ? 
C90 C91 H91 120.2 . . ? 
C92 C91 H91 120.2 . . ? 
C91 C92 C93 120.8(5) . . ? 
C91 C92 H92 119.6 . . ? 
C93 C92 H92 119.6 . . ? 
C92 C93 C88 120.2(5) . . ? 
C92 C93 H93 119.9 . . ? 
C88 C93 H93 119.9 . . ? 
C95 C94 C99 119.0(5) . . ? 
C95 C94 P5 120.9(4) . . ? 
C99 C94 P5 120.1(4) . . ? 
C96 C95 C94 121.2(6) . . ? 
C96 C95 H95 119.4 . . ? 
C94 C95 H95 119.4 . . ? 
C95 C96 C97 119.6(6) . . ? 
C95 C96 H96 120.2 . . ? 
C97 C96 H96 120.2 . . ? 
C98 C97 C96 120.2(5) . . ? 
C98 C97 H97 119.9 . . ? 
C96 C97 H97 119.9 . . ? 
C97 C98 C99 120.3(6) . . ? 
C97 C98 H98 119.8 . . ? 
C99 C98 H98 119.8 . . ? 
C98 C99 C94 119.6(6) . . ? 
C98 C99 H99 120.2 . . ? 
C94 C99 H99 120.2 . . ? 
C100 N5 P5 131.1(4) . . ? 
N5 C100 C101 125.1(4) . . ? 
N5 C100 C105 117.3(5) . . ? 
C101 C100 C105 117.2(5) . . ? 
C102 C101 C100 120.1(5) . . ? 
C102 C101 C107 117.0(5) . . ? 
C100 C101 C107 122.7(5) . . ? 
C103 C102 C101 122.3(5) . . ? 
C103 C102 H10A 118.8 . . ? 
C101 C102 H10A 118.8 . . ? 
C104 C103 C102 116.8(5) . . ? 
C104 C103 C108 122.1(5) . . ? 
C102 C103 C108 121.1(5) . . ? 
C103 C104 C105 122.9(5) . . ? 
C103 C104 H10B 118.5 . . ? 
C105 C104 H10B 118.5 . . ? 
C104 C105 C100 120.3(5) . . ? 
C104 C105 C106 120.5(5) . . ? 
C100 C105 C106 119.1(5) . . ? 
C105 C106 H10D 109.5 . . ? 
C105 C106 H10E 109.5 . . ? 
H10D C106 H10E 109.5 . . ? 
C105 C106 H10C 109.5 . . ? 
H10D C106 H10C 109.5 . . ? 
H10E C106 H10C 109.5 . . ? 
C101 C107 H10F 109.5 . . ? 
C101 C107 H10H 109.5 . . ? 
H10F C107 H10H 109.5 . . ? 
C101 C107 H10G 109.5 . . ? 
H10F C107 H10G 109.5 . . ? 
H10H C107 H10G 109.5 . . ? 
C103 C108 H10I 109.5 . . ? 
C103 C108 H10K 109.5 . . ? 
H10I C108 H10K 109.5 . . ? 
C103 C108 H10J 109.5 . . ? 
H10I C108 H10J 109.5 . . ? 
H10K C108 H10J 109.5 . . ? 
N6 P6 C87 124.4(2) . . ? 
N6 P6 C115 105.3(2) . . ? 
C87 P6 C115 106.8(2) . . ? 
N6 P6 C109 108.5(2) . . ? 
C87 P6 C109 106.2(2) . . ? 
C115 P6 C109 103.9(2) . . ? 
C114 C109 C110 119.1(5) . . ? 
C114 C109 P6 118.2(4) . . ? 
C110 C109 P6 122.5(4) . . ? 
C111 C110 C109 120.1(5) . . ? 
C111 C110 H11A 120.0 . . ? 
C109 C110 H11A 120.0 . . ? 
C110 C111 C112 120.3(5) . . ? 
C110 C111 H11B 119.8 . . ? 
C112 C111 H11B 119.8 . . ? 
C113 C112 C111 119.2(5) . . ? 
C113 C112 H11C 120.4 . . ? 
C111 C112 H11C 120.4 . . ? 
C112 C113 C114 120.9(5) . . ? 
C112 C113 H11D 119.5 . . ? 
C114 C113 H11D 119.5 . . ? 
C113 C114 C109 120.3(5) . . ? 
C113 C114 H11E 119.8 . . ? 
C109 C114 H11E 119.8 . . ? 
C116 C115 C120 118.7(5) . . ? 
C116 C115 P6 122.2(4) . . ? 
C120 C115 P6 119.0(4) . . ? 
C115 C116 C117 120.5(5) . . ? 
C115 C116 H11F 119.8 . . ? 
C117 C116 H11F 119.8 . . ? 
C118 C117 C116 119.9(5) . . ? 
C118 C117 H11G 120.1 . . ? 
C116 C117 H11G 120.1 . . ? 
C117 C118 C119 120.4(5) . . ? 
C117 C118 H11H 119.8 . . ? 
C119 C118 H11H 119.8 . . ? 
C118 C119 C120 120.0(5) . . ? 
C118 C119 H11I 120.0 . . ? 
C120 C119 H11I 120.0 . . ? 
C119 C120 C115 120.6(5) . . ? 
C119 C120 H12A 119.7 . . ? 
C115 C120 H12A 119.7 . . ? 
C121 N6 P6 134.3(4) . . ? 
N6 C121 C122 116.3(5) . . ? 
N6 C121 C126 126.4(5) . . ? 
C122 C121 C126 117.2(4) . . ? 
C123 C122 C121 121.2(5) . . ? 
C123 C122 C128 120.0(5) . . ? 
C121 C122 C128 118.8(5) . . ? 
C124 C123 C122 121.8(5) . . ? 
C124 C123 H12B 119.1 . . ? 
C122 C123 H12B 119.1 . . ? 
C125 C124 C123 116.9(5) . . ? 
C125 C124 C129 121.2(5) . . ? 
C123 C124 C129 121.9(5) . . ? 
C124 C125 C126 123.8(5) . . ? 
C124 C125 H12C 118.1 . . ? 
C126 C125 H12C 118.1 . . ? 
C125 C126 C121 119.0(5) . . ? 
C125 C126 C127 118.0(5) . . ? 
C121 C126 C127 122.8(4) . . ? 
C126 C127 H12D 109.5 . . ? 
C126 C127 H12F 109.5 . . ? 
H12D C127 H12F 109.5 . . ? 
C126 C127 H12E 109.5 . . ? 
H12D C127 H12E 109.5 . . ? 
H12F C127 H12E 109.5 . . ? 
C122 C128 H12I 109.5 . . ? 
C122 C128 H12H 109.5 . . ? 
H12I C128 H12H 109.5 . . ? 
C122 C128 H12G 109.5 . . ? 
H12I C128 H12G 109.5 . . ? 
H12H C128 H12G 109.5 . . ? 
C124 C129 H12K 109.5 . . ? 
C124 C129 H12L 109.5 . . ? 
H12K C129 H12L 109.5 . . ? 
C124 C129 H12J 109.5 . . ? 
H12K C129 H12J 109.5 . . ? 
H12L C129 H12J 109.5 . . ? 
C131 C130 H13A 109.5 . . ? 
C131 C130 H13C 109.5 . . ? 
H13A C130 H13C 109.5 . . ? 
C131 C130 H13B 109.5 . . ? 
H13A C130 H13B 109.5 . . ? 
H13C C130 H13B 109.5 . . ? 
C136 C131 C132 121.2(9) . . ? 
C136 C131 C130 120.2(9) . . ? 
C132 C131 C130 118.6(10) . . ? 
C131 C132 C133 118.2(10) . . ? 
C131 C132 H13D 120.9 . . ? 
C133 C132 H13D 120.9 . . ? 
C132 C133 C134 121.1(11) . . ? 
C132 C133 H13E 119.4 . . ? 
C134 C133 H13E 119.4 . . ? 
C133 C134 C135 120.3(10) . . ? 
C133 C134 H13F 119.9 . . ? 
C135 C134 H13F 119.9 . . ? 
C136 C135 C134 117.7(11) . . ? 
C136 C135 H13G 121.2 . . ? 
C134 C135 H13G 121.2 . . ? 
C131 C136 C135 121.6(10) . . ? 
C131 C136 H13H 119.2 . . ? 
C135 C136 H13H 119.2 . . ? 
C138 C137 H13I 109.5 . . ? 
C138 C137 H13J 109.5 . . ? 
H13I C137 H13J 109.5 . . ? 
C138 C137 H13K 109.5 . . ? 
H13I C137 H13K 109.5 . . ? 
H13J C137 H13K 109.5 . . ? 
C143 C138 C137 120.7(10) . . ? 
C143 C138 C139 121.3(10) . . ? 
C137 C138 C139 117.9(11) . . ? 
C140 C139 C138 115.3(10) . . ? 
C140 C139 H13L 122.4 . . ? 
C138 C139 H13L 122.4 . . ? 
C139 C140 C141 123.5(10) . . ? 
C139 C140 H14A 118.2 . . ? 
C141 C140 H14A 118.2 . . ? 
C142 C141 C140 112.5(12) . . ? 
C142 C141 H14B 123.8 . . ? 
C140 C141 H14B 123.8 . . ? 
C141 C142 C143 131.5(16) . . ? 
C141 C142 H14C 114.2 . . ? 
C143 C142 H14C 114.2 . . ? 
C138 C143 C142 115.7(10) . . ? 
C138 C143 H14K 122.1 . . ? 
C142 C143 H14K 122.1 . . ? 
C145 C144 H14F 109.5 . . ? 
C145 C144 H14E 109.5 . . ? 
H14F C144 H14E 109.5 . . ? 
C145 C144 H14D 109.5 . . ? 
H14F C144 H14D 109.5 . . ? 
H14E C144 H14D 109.5 . . ? 
C146 C145 C150 117.4(6) . . ? 
C146 C145 C144 121.0(6) . . ? 
C150 C145 C144 121.6(6) . . ? 
C147 C146 C145 121.7(6) . . ? 
C147 C146 H14G 119.2 . . ? 
C145 C146 H14G 119.2 . . ? 
C146 C147 C148 120.9(6) . . ? 
C146 C147 H14H 119.6 . . ? 
C148 C147 H14H 119.6 . . ? 
C147 C148 C149 118.6(6) . . ? 
C147 C148 H14I 120.7 . . ? 
C149 C148 H14I 120.7 . . ? 
C148 C149 C150 120.2(6) . . ? 
C148 C149 H14J 119.9 . . ? 
C150 C149 H14J 119.9 . . ? 
C145 C150 C149 121.3(7) . . ? 
C145 C150 H15H 119.4 . . ? 
C149 C150 H15H 119.4 . . ? 
C152 C151 H15B 109.5 . . ? 
C152 C151 H15C 109.5 . . ? 
H15B C151 H15C 109.5 . . ? 
C152 C151 H15A 109.5 . . ? 
H15B C151 H15A 109.5 . . ? 
H15C C151 H15A 109.5 . . ? 
C153 C152 C157 118.1(8) . . ? 
C153 C152 C151 121.9(8) . . ? 
C157 C152 C151 120.0(8) . . ? 
C152 C153 C154 121.0(8) . . ? 
C152 C153 H15 119.5 . . ? 
C154 C153 H15 119.5 . . ? 
C155 C154 C153 121.2(8) . . ? 
C155 C154 H15D 119.4 . . ? 
C153 C154 H15D 119.4 . . ? 
C154 C155 C156 118.1(8) . . ? 
C154 C155 H15E 121.0 . . ? 
C156 C155 H15E 121.0 . . ? 
C157 C156 C155 123.2(8) . . ? 
C157 C156 H15F 118.4 . . ? 
C155 C156 H15F 118.4 . . ? 
C156 C157 C152 118.4(8) . . ? 
C156 C157 H15G 120.8 . . ? 
C152 C157 H15G 120.8 . . ? 
C159 C158 H15K 109.5 . . ? 
C159 C158 H15J 109.5 . . ? 
H15K C158 H15J 109.5 . . ? 
C159 C158 H15I 109.5 . . ? 
H15K C158 H15I 109.5 . . ? 
H15J C158 H15I 109.5 . . ? 
C164 C159 C160 118.3(7) . . ? 
C164 C159 C158 120.7(6) . . ? 
C160 C159 C158 121.0(6) . . ? 
C161 C160 C159 119.1(7) . . ? 
C161 C160 H16A 120.4 . . ? 
C159 C160 H16A 120.4 . . ? 
C162 C161 C160 122.0(7) . . ? 
C162 C161 H16B 119.0 . . ? 
C160 C161 H16B 119.0 . . ? 
C163 C162 C161 119.0(8) . . ? 
C163 C162 H16C 120.5 . . ? 
C161 C162 H16C 120.5 . . ? 
C162 C163 C164 120.0(8) . . ? 
C162 C163 H16D 120.0 . . ? 
C164 C163 H16D 120.0 . . ? 
C163 C164 C159 121.6(7) . . ? 
C163 C164 H16E 119.2 . . ? 
C159 C164 H16E 119.2 . . ? 
 
loop_ 
 _geom_torsion_atom_site_label_1 
 _geom_torsion_atom_site_label_2 
 _geom_torsion_atom_site_label_3 
 _geom_torsion_atom_site_label_4 
 _geom_torsion 
 _geom_torsion_site_symmetry_1 
 _geom_torsion_site_symmetry_2 
 _geom_torsion_site_symmetry_3 
 _geom_torsion_site_symmetry_4 
 _geom_torsion_publ_flag 
N2 Er1 C1 P1 129.2(2) . . . . ? 
N4 Er1 C1 P1 -107.39(18) . . . . ? 
N1 Er1 C1 P1 7.05(15) . . . . ? 
N3 Er1 C1 P1 37.6(4) . . . . ? 
C44 Er1 C1 P1 -160.40(18) . . . . ? 
N2 Er1 C1 P2 1.79(15) . . . . ? 
N4 Er1 C1 P2 125.17(18) . . . . ? 
N1 Er1 C1 P2 -120.4(2) . . . . ? 
N3 Er1 C1 P2 -89.8(3) . . . . ? 
C44 Er1 C1 P2 72.2(3) . . . . ? 
P2 C1 P1 N1 77.9(3) . . . . ? 
Er1 C1 P1 N1 -9.3(2) . . . . ? 
P2 C1 P1 C8 -158.9(3) . . . . ? 
Er1 C1 P1 C8 113.88(18) . . . . ? 
P2 C1 P1 C2 -49.2(4) . . . . ? 
Er1 C1 P1 C2 -136.42(19) . . . . ? 
N1 P1 C2 C3 31.3(5) . . . . ? 
C1 P1 C2 C3 151.9(4) . . . . ? 
C8 P1 C2 C3 -94.1(5) . . . . ? 
N1 P1 C2 C7 -157.0(4) . . . . ? 
C1 P1 C2 C7 -36.4(5) . . . . ? 
C8 P1 C2 C7 77.6(4) . . . . ? 
C7 C2 C3 C4 1.7(7) . . . . ? 
P1 C2 C3 C4 173.2(4) . . . . ? 
C2 C3 C4 C5 -1.5(8) . . . . ? 
C3 C4 C5 C6 1.0(8) . . . . ? 
C4 C5 C6 C7 -0.8(8) . . . . ? 
C5 C6 C7 C2 1.1(8) . . . . ? 
C3 C2 C7 C6 -1.5(7) . . . . ? 
P1 C2 C7 C6 -173.6(4) . . . . ? 
N1 P1 C8 C13 -98.6(4) . . . . ? 
C1 P1 C8 C13 147.1(4) . . . . ? 
C2 P1 C8 C13 26.1(5) . . . . ? 
N1 P1 C8 C9 80.4(4) . . . . ? 
C1 P1 C8 C9 -33.9(4) . . . . ? 
C2 P1 C8 C9 -155.0(4) . . . . ? 
C13 C8 C9 C10 0.3(7) . . . . ? 
P1 C8 C9 C10 -178.6(4) . . . . ? 
C8 C9 C10 C11 -0.9(8) . . . . ? 
C9 C10 C11 C12 1.3(8) . . . . ? 
C10 C11 C12 C13 -1.2(9) . . . . ? 
C11 C12 C13 C8 0.7(9) . . . . ? 
C9 C8 C13 C12 -0.2(8) . . . . ? 
P1 C8 C13 C12 178.7(5) . . . . ? 
C1 P1 N1 C14 -174.9(4) . . . . ? 
C8 P1 N1 C14 68.6(4) . . . . ? 
C2 P1 N1 C14 -47.4(4) . . . . ? 
C1 P1 N1 Er1 10.9(2) . . . . ? 
C8 P1 N1 Er1 -105.6(2) . . . . ? 
C2 P1 N1 Er1 138.4(2) . . . . ? 
N2 Er1 N1 C14 127.6(4) . . . . ? 
N4 Er1 N1 C14 -96.4(4) . . . . ? 
N3 Er1 N1 C14 12.3(4) . . . . ? 
C1 Er1 N1 C14 179.2(5) . . . . ? 
C44 Er1 N1 C14 -17.3(6) . . . . ? 
N2 Er1 N1 P1 -59.3(2) . . . . ? 
N4 Er1 N1 P1 76.7(2) . . . . ? 
N3 Er1 N1 P1 -174.62(18) . . . . ? 
C1 Er1 N1 P1 -7.72(16) . . . . ? 
C44 Er1 N1 P1 155.8(2) . . . . ? 
P1 N1 C14 C19 104.3(5) . . . . ? 
Er1 N1 C14 C19 -83.6(5) . . . . ? 
P1 N1 C14 C15 -77.8(5) . . . . ? 
Er1 N1 C14 C15 94.3(5) . . . . ? 
C19 C14 C15 C16 -2.7(7) . . . . ? 
N1 C14 C15 C16 179.4(4) . . . . ? 
C19 C14 C15 C21 173.0(5) . . . . ? 
N1 C14 C15 C21 -5.0(7) . . . . ? 
C14 C15 C16 C17 1.0(8) . . . . ? 
C21 C15 C16 C17 -174.9(5) . . . . ? 
C15 C16 C17 C18 0.8(8) . . . . ? 
C15 C16 C17 C22 178.8(5) . . . . ? 
C16 C17 C18 C19 -0.9(8) . . . . ? 
C22 C17 C18 C19 -178.9(5) . . . . ? 
C17 C18 C19 C14 -0.8(8) . . . . ? 
C17 C18 C19 C20 -179.9(5) . . . . ? 
C15 C14 C19 C18 2.6(7) . . . . ? 
N1 C14 C19 C18 -179.4(4) . . . . ? 
C15 C14 C19 C20 -178.3(4) . . . . ? 
N1 C14 C19 C20 -0.4(7) . . . . ? 
P1 C1 P2 N2 -90.1(3) . . . . ? 
Er1 C1 P2 N2 -2.4(2) . . . . ? 
P1 C1 P2 C23 35.0(4) . . . . ? 
Er1 C1 P2 C23 122.7(2) . . . . ? 
P1 C1 P2 C29 149.1(3) . . . . ? 
Er1 C1 P2 C29 -123.22(18) . . . . ? 
N2 P2 C23 C28 -133.7(4) . . . . ? 
C1 P2 C23 C28 106.7(4) . . . . ? 
C29 P2 C23 C28 -12.3(5) . . . . ? 
N2 P2 C23 C24 52.6(4) . . . . ? 
C1 P2 C23 C24 -67.0(4) . . . . ? 
C29 P2 C23 C24 174.1(4) . . . . ? 
C28 C23 C24 C25 0.7(7) . . . . ? 
P2 C23 C24 C25 174.7(4) . . . . ? 
C23 C24 C25 C26 -0.4(8) . . . . ? 
C24 C25 C26 C27 -0.4(8) . . . . ? 
C25 C26 C27 C28 0.7(8) . . . . ? 
C26 C27 C28 C23 -0.4(8) . . . . ? 
C24 C23 C28 C27 -0.3(7) . . . . ? 
P2 C23 C28 C27 -174.0(4) . . . . ? 
N2 P2 C29 C30 -114.4(4) . . . . ? 
C1 P2 C29 C30 1.8(5) . . . . ? 
C23 P2 C29 C30 122.7(4) . . . . ? 
N2 P2 C29 C34 63.2(4) . . . . ? 
C1 P2 C29 C34 179.4(4) . . . . ? 
C23 P2 C29 C34 -59.7(4) . . . . ? 
C34 C29 C30 C31 -2.6(7) . . . . ? 
P2 C29 C30 C31 174.9(4) . . . . ? 
C29 C30 C31 C32 0.7(7) . . . . ? 
C30 C31 C32 C33 2.1(7) . . . . ? 
C31 C32 C33 C34 -2.9(7) . . . . ? 
C32 C33 C34 C29 1.0(7) . . . . ? 
C30 C29 C34 C33 1.8(7) . . . . ? 
P2 C29 C34 C33 -175.9(4) . . . . ? 
C1 P2 N2 C35 -167.5(3) . . . . ? 
C23 P2 N2 C35 68.1(4) . . . . ? 
C29 P2 N2 C35 -47.7(4) . . . . ? 
C1 P2 N2 Er1 2.8(2) . . . . ? 
C23 P2 N2 Er1 -121.7(2) . . . . ? 
C29 P2 N2 Er1 122.6(2) . . . . ? 
N4 Er1 N2 C35 84.6(5) . . . . ? 
N1 Er1 N2 C35 -144.2(4) . . . . ? 
N3 Er1 N2 C35 -43.7(5) . . . . ? 
C1 Er1 N2 C35 165.2(5) . . . . ? 
C44 Er1 N2 C35 20.3(5) . . . . ? 
N4 Er1 N2 P2 -82.6(2) . . . . ? 
N1 Er1 N2 P2 48.7(2) . . . . ? 
N3 Er1 N2 P2 149.07(17) . . . . ? 
C1 Er1 N2 P2 -1.94(17) . . . . ? 
C44 Er1 N2 P2 -146.89(18) . . . . ? 
P2 N2 C35 C40 -90.8(5) . . . . ? 
Er1 N2 C35 C40 103.4(5) . . . . ? 
P2 N2 C35 C36 88.8(5) . . . . ? 
Er1 N2 C35 C36 -77.0(6) . . . . ? 
C40 C35 C36 C37 4.3(7) . . . . ? 
N2 C35 C36 C37 -175.3(4) . . . . ? 
C40 C35 C36 C41 -174.8(4) . . . . ? 
N2 C35 C36 C41 5.6(7) . . . . ? 
C35 C36 C37 C38 -2.5(7) . . . . ? 
C41 C36 C37 C38 176.7(5) . . . . ? 
C36 C37 C38 C39 -0.7(8) . . . . ? 
C36 C37 C38 C43 -177.4(5) . . . . ? 
C37 C38 C39 C40 2.1(8) . . . . ? 
C43 C38 C39 C40 178.9(5) . . . . ? 
C38 C39 C40 C35 -0.3(8) . . . . ? 
C38 C39 C40 C42 -179.2(5) . . . . ? 
C36 C35 C40 C39 -3.0(7) . . . . ? 
N2 C35 C40 C39 176.6(4) . . . . ? 
C36 C35 C40 C42 175.9(4) . . . . ? 
N2 C35 C40 C42 -4.5(7) . . . . ? 
N2 Er1 C44 P4 125.63(18) . . . . ? 
N4 Er1 C44 P4 3.60(15) . . . . ? 
N1 Er1 C44 P4 -88.9(3) . . . . ? 
N3 Er1 C44 P4 -122.6(2) . . . . ? 
C1 Er1 C44 P4 66.3(3) . . . . ? 
N2 Er1 C44 P3 -105.25(18) . . . . ? 
N4 Er1 C44 P3 132.7(2) . . . . ? 
N1 Er1 C44 P3 40.2(4) . . . . ? 
N3 Er1 C44 P3 6.48(15) . . . . ? 
C1 Er1 C44 P3 -164.61(17) . . . . ? 
P4 C44 P3 N3 78.9(4) . . . . ? 
Er1 C44 P3 N3 -8.6(2) . . . . ? 
P4 C44 P3 C45 -47.6(4) . . . . ? 
Er1 C44 P3 C45 -135.13(19) . . . . ? 
P4 C44 P3 C51 -157.9(3) . . . . ? 
Er1 C44 P3 C51 114.57(19) . . . . ? 
N3 P3 C45 C46 31.9(5) . . . . ? 
C44 P3 C45 C46 151.6(4) . . . . ? 
C51 P3 C45 C46 -94.9(5) . . . . ? 
N3 P3 C45 C50 -152.6(4) . . . . ? 
C44 P3 C45 C50 -32.8(5) . . . . ? 
C51 P3 C45 C50 80.7(4) . . . . ? 
C50 C45 C46 C47 3.1(7) . . . . ? 
P3 C45 C46 C47 178.6(4) . . . . ? 
C45 C46 C47 C48 -0.3(8) . . . . ? 
C46 C47 C48 C49 -2.6(8) . . . . ? 
C47 C48 C49 C50 2.5(8) . . . . ? 
C48 C49 C50 C45 0.5(8) . . . . ? 
C46 C45 C50 C49 -3.3(7) . . . . ? 
P3 C45 C50 C49 -179.1(4) . . . . ? 
N3 P3 C51 C56 -104.0(4) . . . . ? 
C44 P3 C51 C56 141.6(4) . . . . ? 
C45 P3 C51 C56 22.0(5) . . . . ? 
N3 P3 C51 C52 72.1(5) . . . . ? 
C44 P3 C51 C52 -42.3(5) . . . . ? 
C45 P3 C51 C52 -161.9(4) . . . . ? 
C56 C51 C52 C53 -0.2(8) . . . . ? 
P3 C51 C52 C53 -176.4(4) . . . . ? 
C51 C52 C53 C54 0.7(8) . . . . ? 
C52 C53 C54 C55 -1.1(9) . . . . ? 
C53 C54 C55 C56 1.0(9) . . . . ? 
C52 C51 C56 C55 0.0(8) . . . . ? 
P3 C51 C56 C55 176.2(4) . . . . ? 
C54 C55 C56 C51 -0.4(9) . . . . ? 
C44 P3 N3 C57 -176.2(4) . . . . ? 
C45 P3 N3 C57 -50.6(4) . . . . ? 
C51 P3 N3 C57 67.7(4) . . . . ? 
C44 P3 N3 Er1 10.0(2) . . . . ? 
C45 P3 N3 Er1 135.7(2) . . . . ? 
C51 P3 N3 Er1 -106.0(2) . . . . ? 
N2 Er1 N3 C57 -91.0(4) . . . . ? 
N4 Er1 N3 C57 132.2(4) . . . . ? 
N1 Er1 N3 C57 15.3(4) . . . . ? 
C1 Er1 N3 C57 -11.7(6) . . . . ? 
C44 Er1 N3 C57 -179.6(5) . . . . ? 
N2 Er1 N3 P3 81.5(2) . . . . ? 
N4 Er1 N3 P3 -55.4(2) . . . . ? 
N1 Er1 N3 P3 -172.27(19) . . . . ? 
C1 Er1 N3 P3 160.8(2) . . . . ? 
C44 Er1 N3 P3 -7.12(17) . . . . ? 
P3 N3 C57 C62 104.9(5) . . . . ? 
Er1 N3 C57 C62 -83.7(5) . . . . ? 
P3 N3 C57 C58 -78.5(5) . . . . ? 
Er1 N3 C57 C58 92.9(6) . . . . ? 
C62 C57 C58 C59 -5.0(7) . . . . ? 
N3 C57 C58 C59 178.3(4) . . . . ? 
C62 C57 C58 C64 173.0(5) . . . . ? 
N3 C57 C58 C64 -3.7(7) . . . . ? 
C57 C58 C59 C60 3.0(8) . . . . ? 
C64 C58 C59 C60 -175.1(5) . . . . ? 
C58 C59 C60 C61 0.7(8) . . . . ? 
C58 C59 C60 C65 179.1(5) . . . . ? 
C59 C60 C61 C62 -2.2(8) . . . . ? 
C65 C60 C61 C62 179.4(5) . . . . ? 
C60 C61 C62 C57 0.1(8) . . . . ? 
C60 C61 C62 C63 -179.2(5) . . . . ? 
C58 C57 C62 C61 3.5(7) . . . . ? 
N3 C57 C62 C61 -179.7(4) . . . . ? 
C58 C57 C62 C63 -177.2(4) . . . . ? 
N3 C57 C62 C63 -0.4(7) . . . . ? 
P3 C44 P4 N4 -92.9(4) . . . . ? 
Er1 C44 P4 N4 -4.8(2) . . . . ? 
P3 C44 P4 C72 143.4(3) . . . . ? 
Er1 C44 P4 C72 -128.49(18) . . . . ? 
P3 C44 P4 C66 29.7(4) . . . . ? 
Er1 C44 P4 C66 117.8(2) . . . . ? 
N4 P4 C66 C67 56.4(4) . . . . ? 
C44 P4 C66 C67 -61.9(4) . . . . ? 
C72 P4 C66 C67 179.8(4) . . . . ? 
N4 P4 C66 C71 -126.2(4) . . . . ? 
C44 P4 C66 C71 115.5(5) . . . . ? 
C72 P4 C66 C71 -2.8(5) . . . . ? 
C71 C66 C67 C68 -1.3(7) . . . . ? 
P4 C66 C67 C68 176.3(4) . . . . ? 
C66 C67 C68 C69 2.4(8) . . . . ? 
C67 C68 C69 C70 -0.6(8) . . . . ? 
C68 C69 C70 C71 -2.2(9) . . . . ? 
C69 C70 C71 C66 3.4(9) . . . . ? 
C67 C66 C71 C70 -1.6(8) . . . . ? 
P4 C66 C71 C70 -178.9(4) . . . . ? 
N4 P4 C72 C73 -126.4(4) . . . . ? 
C44 P4 C72 C73 -9.1(5) . . . . ? 
C66 P4 C72 C73 112.0(4) . . . . ? 
N4 P4 C72 C77 59.2(4) . . . . ? 
C44 P4 C72 C77 176.5(3) . . . . ? 
C66 P4 C72 C77 -62.4(4) . . . . ? 
C77 C72 C73 C74 -0.9(7) . . . . ? 
P4 C72 C73 C74 -175.2(4) . . . . ? 
C72 C73 C74 C75 1.8(7) . . . . ? 
C73 C74 C75 C76 -1.3(7) . . . . ? 
C74 C75 C76 C77 0.0(7) . . . . ? 
C75 C76 C77 C72 0.9(7) . . . . ? 
C73 C72 C77 C76 -0.5(7) . . . . ? 
P4 C72 C77 C76 174.2(4) . . . . ? 
C44 P4 N4 C78 -165.5(3) . . . . ? 
C72 P4 N4 C78 -45.2(4) . . . . ? 
C66 P4 N4 C78 70.7(4) . . . . ? 
C44 P4 N4 Er1 5.7(2) . . . . ? 
C72 P4 N4 Er1 126.0(2) . . . . ? 
C66 P4 N4 Er1 -118.1(2) . . . . ? 
N2 Er1 N4 C78 80.7(5) . . . . ? 
N1 Er1 N4 C78 -45.7(5) . . . . ? 
N3 Er1 N4 C78 -147.5(4) . . . . ? 
C1 Er1 N4 C78 17.2(4) . . . . ? 
C44 Er1 N4 C78 164.7(5) . . . . ? 
N2 Er1 N4 P4 -88.0(2) . . . . ? 
N1 Er1 N4 P4 145.65(17) . . . . ? 
N3 Er1 N4 P4 43.9(2) . . . . ? 
C1 Er1 N4 P4 -151.43(18) . . . . ? 
C44 Er1 N4 P4 -3.96(16) . . . . ? 
P4 N4 C78 C83 90.1(5) . . . . ? 
Er1 N4 C78 C83 -77.3(6) . . . . ? 
P4 N4 C78 C79 -90.3(5) . . . . ? 
Er1 N4 C78 C79 102.2(5) . . . . ? 
C83 C78 C79 C80 -3.7(7) . . . . ? 
N4 C78 C79 C80 176.8(4) . . . . ? 
C83 C78 C79 C85 174.9(5) . . . . ? 
N4 C78 C79 C85 -4.6(7) . . . . ? 
C78 C79 C80 C81 1.9(8) . . . . ? 
C85 C79 C80 C81 -176.8(5) . . . . ? 
C79 C80 C81 C82 0.3(8) . . . . ? 
C79 C80 C81 C86 178.9(5) . . . . ? 
C80 C81 C82 C83 -0.9(8) . . . . ? 
C86 C81 C82 C83 -179.4(5) . . . . ? 
C81 C82 C83 C78 -0.9(8) . . . . ? 
C81 C82 C83 C84 -179.9(5) . . . . ? 
C79 C78 C83 C82 3.2(7) . . . . ? 
N4 C78 C83 C82 -177.2(4) . . . . ? 
C79 C78 C83 C84 -177.8(4) . . . . ? 
N4 C78 C83 C84 1.7(7) . . . . ? 
P6 C87 P5 N5 -96.3(4) . . . . ? 
P6 C87 P5 C88 28.9(4) . . . . ? 
P6 C87 P5 C94 137.7(3) . . . . ? 
N5 P5 C88 C89 -175.8(4) . . . . ? 
C87 P5 C88 C89 48.7(5) . . . . ? 
C94 P5 C88 C89 -62.6(5) . . . . ? 
N5 P5 C88 C93 3.8(5) . . . . ? 
C87 P5 C88 C93 -131.7(4) . . . . ? 
C94 P5 C88 C93 117.0(4) . . . . ? 
C93 C88 C89 C90 -1.7(8) . . . . ? 
P5 C88 C89 C90 178.0(4) . . . . ? 
C88 C89 C90 C91 0.7(8) . . . . ? 
C89 C90 C91 C92 0.3(8) . . . . ? 
C90 C91 C92 C93 -0.5(8) . . . . ? 
C91 C92 C93 C88 -0.5(8) . . . . ? 
C89 C88 C93 C92 1.6(7) . . . . ? 
P5 C88 C93 C92 -178.1(4) . . . . ? 
N5 P5 C94 C95 7.5(5) . . . . ? 
C87 P5 C94 C95 143.0(4) . . . . ? 
C88 P5 C94 C95 -104.4(4) . . . . ? 
N5 P5 C94 C99 -170.3(4) . . . . ? 
C87 P5 C94 C99 -34.7(5) . . . . ? 
C88 P5 C94 C99 77.8(5) . . . . ? 
C99 C94 C95 C96 -2.3(8) . . . . ? 
P5 C94 C95 C96 179.9(4) . . . . ? 
C94 C95 C96 C97 0.2(8) . . . . ? 
C95 C96 C97 C98 1.3(8) . . . . ? 
C96 C97 C98 C99 -0.7(9) . . . . ? 
C97 C98 C99 C94 -1.4(8) . . . . ? 
C95 C94 C99 C98 2.9(8) . . . . ? 
P5 C94 C99 C98 -179.3(4) . . . . ? 
C87 P5 N5 C100 -10.1(6) . . . . ? 
C88 P5 N5 C100 -135.8(5) . . . . ? 
C94 P5 N5 C100 115.0(5) . . . . ? 
P5 N5 C100 C101 -48.5(7) . . . . ? 
P5 N5 C100 C105 138.5(4) . . . . ? 
N5 C100 C101 C102 -178.8(5) . . . . ? 
C105 C100 C101 C102 -5.7(7) . . . . ? 
N5 C100 C101 C107 -3.1(8) . . . . ? 
C105 C100 C101 C107 169.9(5) . . . . ? 
C100 C101 C102 C103 3.3(8) . . . . ? 
C107 C101 C102 C103 -172.5(5) . . . . ? 
C101 C102 C103 C104 0.3(8) . . . . ? 
C101 C102 C103 C108 178.6(5) . . . . ? 
C102 C103 C104 C105 -1.2(8) . . . . ? 
C108 C103 C104 C105 -179.5(5) . . . . ? 
C103 C104 C105 C100 -1.4(8) . . . . ? 
C103 C104 C105 C106 175.1(5) . . . . ? 
N5 C100 C105 C104 178.4(5) . . . . ? 
C101 C100 C105 C104 4.9(7) . . . . ? 
N5 C100 C105 C106 1.9(7) . . . . ? 
C101 C100 C105 C106 -171.7(5) . . . . ? 
P5 C87 P6 N6 -89.1(4) . . . . ? 
P5 C87 P6 C115 33.6(4) . . . . ? 
P5 C87 P6 C109 144.0(3) . . . . ? 
N6 P6 C109 C114 20.1(4) . . . . ? 
C87 P6 C109 C114 155.9(4) . . . . ? 
C115 P6 C109 C114 -91.6(4) . . . . ? 
N6 P6 C109 C110 -155.2(4) . . . . ? 
C87 P6 C109 C110 -19.4(5) . . . . ? 
C115 P6 C109 C110 93.1(4) . . . . ? 
C114 C109 C110 C111 -2.6(7) . . . . ? 
P6 C109 C110 C111 172.6(4) . . . . ? 
C109 C110 C111 C112 0.7(7) . . . . ? 
C110 C111 C112 C113 2.1(8) . . . . ? 
C111 C112 C113 C114 -3.0(8) . . . . ? 
C112 C113 C114 C109 1.0(7) . . . . ? 
C110 C109 C114 C113 1.8(7) . . . . ? 
P6 C109 C114 C113 -173.7(4) . . . . ? 
N6 P6 C115 C116 1.6(5) . . . . ? 
C87 P6 C115 C116 -132.3(4) . . . . ? 
C109 P6 C115 C116 115.7(4) . . . . ? 
N6 P6 C115 C120 179.8(4) . . . . ? 
C87 P6 C115 C120 45.9(4) . . . . ? 
C109 P6 C115 C120 -66.1(4) . . . . ? 
C120 C115 C116 C117 -0.2(8) . . . . ? 
P6 C115 C116 C117 178.0(4) . . . . ? 
C115 C116 C117 C118 0.3(8) . . . . ? 
C116 C117 C118 C119 0.2(8) . . . . ? 
C117 C118 C119 C120 -0.8(8) . . . . ? 
C118 C119 C120 C115 0.9(7) . . . . ? 
C116 C115 C120 C119 -0.4(7) . . . . ? 
P6 C115 C120 C119 -178.6(4) . . . . ? 
C87 P6 N6 C121 -31.5(6) . . . . ? 
C115 P6 N6 C121 -154.9(5) . . . . ? 
C109 P6 N6 C121 94.4(5) . . . . ? 
P6 N6 C121 C122 151.9(4) . . . . ? 
P6 N6 C121 C126 -31.3(8) . . . . ? 
N6 C121 C122 C123 -179.4(5) . . . . ? 
C126 C121 C122 C123 3.5(7) . . . . ? 
N6 C121 C122 C128 0.9(7) . . . . ? 
C126 C121 C122 C128 -176.2(5) . . . . ? 
C121 C122 C123 C124 -0.2(8) . . . . ? 
C128 C122 C123 C124 179.5(5) . . . . ? 
C122 C123 C124 C125 -2.3(8) . . . . ? 
C122 C123 C124 C129 178.0(5) . . . . ? 
C123 C124 C125 C126 1.5(8) . . . . ? 
C129 C124 C125 C126 -178.8(5) . . . . ? 
C124 C125 C126 C121 1.8(8) . . . . ? 
C124 C125 C126 C127 -172.9(5) . . . . ? 
N6 C121 C126 C125 179.0(5) . . . . ? 
C122 C121 C126 C125 -4.2(7) . . . . ? 
N6 C121 C126 C127 -6.5(8) . . . . ? 
C122 C121 C126 C127 170.2(5) . . . . ? 
C136 C131 C132 C133 -0.6(11) . . . . ? 
C130 C131 C132 C133 176.3(7) . . . . ? 
C131 C132 C133 C134 0.9(12) . . . . ? 
C132 C133 C134 C135 -0.6(13) . . . . ? 
C133 C134 C135 C136 -0.1(13) . . . . ? 
C132 C131 C136 C135 -0.1(12) . . . . ? 
C130 C131 C136 C135 -176.9(8) . . . . ? 
C134 C135 C136 C131 0.4(12) . . . . ? 
C143 C138 C139 C140 -3.6(15) . . . . ? 
C137 C138 C139 C140 -178.5(10) . . . . ? 
C138 C139 C140 C141 -0.5(16) . . . . ? 
C139 C140 C141 C142 2.8(16) . . . . ? 
C140 C141 C142 C143 -1.5(18) . . . . ? 
C137 C138 C143 C142 179.7(10) . . . . ? 
C139 C138 C143 C142 4.9(15) . . . . ? 
C141 C142 C143 C138 -2.4(18) . . . . ? 
C150 C145 C146 C147 -0.2(9) . . . . ? 
C144 C145 C146 C147 -179.7(6) . . . . ? 
C145 C146 C147 C148 -0.4(9) . . . . ? 
C146 C147 C148 C149 0.5(9) . . . . ? 
C147 C148 C149 C150 0.0(10) . . . . ? 
C146 C145 C150 C149 0.8(10) . . . . ? 
C144 C145 C150 C149 -179.8(7) . . . . ? 
C148 C149 C150 C145 -0.7(11) . . . . ? 
C157 C152 C153 C154 0.8(10) . . . . ? 
C151 C152 C153 C154 -177.8(7) . . . . ? 
C152 C153 C154 C155 -0.4(10) . . . . ? 
C153 C154 C155 C156 -0.5(10) . . . . ? 
C154 C155 C156 C157 1.1(10) . . . . ? 
C155 C156 C157 C152 -0.7(10) . . . . ? 
C153 C152 C157 C156 -0.3(9) . . . . ? 
C151 C152 C157 C156 178.3(7) . . . . ? 
C164 C159 C160 C161 -0.3(9) . . . . ? 
C158 C159 C160 C161 178.6(6) . . . . ? 
C159 C160 C161 C162 -1.2(10) . . . . ? 
C160 C161 C162 C163 1.8(11) . . . . ? 
C161 C162 C163 C164 -0.9(11) . . . . ? 
C162 C163 C164 C159 -0.7(11) . . . . ? 
C160 C159 C164 C163 1.2(10) . . . . ? 
C158 C159 C164 C163 -177.7(6) . . . . ? 
 
_diffrn_measured_fraction_theta_max    0.995 
_diffrn_reflns_theta_full              25.00 
_diffrn_measured_fraction_theta_full   0.995
 
_refine_diff_density_max    1.92 
_refine_diff_density_min   -1.48 
_refine_diff_density_rms    0.10
 
#=== END


data_6a 
 
_nottingham_internal_coll_name         GMSTLN
_nottingham_internal_coll_number       11243
_nottingham_internal_coll_client       GM/STL
_nottingham_internal_coll_type         custom
_nottingham_internal_coll_frame_time   '12 and 48'
_nottingham_internal_coll_frame_width  '1.00'
_nottingham_internal_coll_frame_method '\w scans'
_nottingham_internal_coll_user         WL
_nottingham_internal_coll_date         12/03/2012
_nottingham_internal_coll_location     NOTTS
_nottingham_internal_NCS_number        ?
_nottingham_internal_process_user      DPM/WL
_nottingham_internal_process_date      13/03/2012
_nottingham_internal_solution_user     DPM/WL
_nottingham_internal_solution_date     13/03/2012
_nottingham_internal_refinement_user   AW/DPM/WL
_nottingham_internal_refinement_date   24/09/2013
_nottingham_internal_validation_user   AJB
_nottingham_internal_validation_date   1/10/2013
_nottingham_internal_archive_date      ?

_refine_special_details 
; 
C64 (methyl carbon of lattice toluene) refined with approximate
 isotropy due to poor atomic displacement parameters.
;

# start Validation Reply Form
_vrf_PLAT973_gmstln
;
PROBLEM: Large Calcd. Positive Residual Density on La1 2.51 eA-3
RESPONSE: Electron density is close to lanthanum and of no
chemical significance, and is present despite applying the 
correct absorption correction
;
_vrf_PLAT971_gmstln
;
PROBLEM: Large Calcd. Non-Metal Positive Residual Density 2.51 eA-3
RESPONSE: Electron density is close to iodine and of no
chemical significance, and is present despite applying the 
correct absorption correction
;
# end Validation Reply Form


_audit_creation_date              2013-09-24
_audit_creation_method
;
  Olex2 1.2
  (compiled Apr 23 2013 17:54:37, GUI svn.r4466)
;
_publ_contact_author_address      ?
_publ_contact_author_email        ?
_publ_contact_author_name         ''
_publ_contact_author_phone        ?
_chemical_name_common             ?
_chemical_name_systematic
;
 ?
;
_chemical_formula_moiety          'C49 H59 I2 La N4 P2, 3(C7 H8)'
_chemical_formula_sum             'C70 H83 I2 La N4 P2'
_chemical_formula_weight           1435.05
_chemical_melting_point            ?
_chemical_oxdiff_formula          'C70 H83 N4 P2 La1 I2'
_chemical_oxdiff_usercomment
'GMSTLN #11243 IN FOMBLIN FILM ON MICROMOUNT FOR GM/STL'
loop_
  _atom_type_symbol
  _atom_type_description
  _atom_type_scat_dispersion_real
  _atom_type_scat_dispersion_imag
  _atom_type_scat_source
 'C' 'C' 0.0181 0.0091 'International Tables Vol C Tables 4.2.6.8 and 6.1.1.4'
 'H' 'H' 0.0000 0.0000 'International Tables Vol C Tables 4.2.6.8 and 6.1.1.4'
 'I' 'I' -0.3257 6.8362 'International Tables Vol C Tables 4.2.6.8 and 6.1.1.4'
 'La' 'La' -1.4094 9.0376
 'International Tables Vol C Tables 4.2.6.8 and 6.1.1.4'
 'N' 'N' 0.0311 0.0180 'International Tables Vol C Tables 4.2.6.8 and 6.1.1.4'
 'P' 'P' 0.2955 0.4335 'International Tables Vol C Tables 4.2.6.8 and 6.1.1.4'

_space_group_crystal_system       'triclinic'
_space_group_IT_number            2
_space_group_name_H-M_alt         'P -1'
_space_group_name_Hall            '-P 1'
loop_
  _space_group_symop_operation_xyz
 'x, y, z'
 '-x, -y, -z'

_cell_length_a                    13.0112(11)
_cell_length_b                    15.2310(11)
_cell_length_c                    17.0292(12)
_cell_angle_alpha                 82.761(6)
_cell_angle_beta                  74.997(7)
_cell_angle_gamma                 87.043(7)
_cell_volume                      3233.1(4)
_cell_formula_units_Z             2
_cell_measurement_reflns_used     8937
_cell_measurement_temperature     90(2)
_cell_measurement_theta_max       75.3947
_cell_measurement_theta_min       3.5146
_exptl_absorpt_coefficient_mu     13.393
_exptl_absorpt_correction_T_max   1.00000
_exptl_absorpt_correction_T_min   0.18860
_exptl_absorpt_correction_type    multi-scan
_exptl_absorpt_process_details
;
CrysAlisPro, Agilent Technologies,
Version 1.171.35.19 (release 27-10-2011 CrysAlis171 .NET)
(compiled Oct 27 2011,15:02:11)
Empirical absorption correction using spherical harmonics,
 implemented in SCALE3 ABSPACK scaling algorithm.
;
_exptl_crystal_colour             colourless
_exptl_crystal_colour_primary     colourless
_exptl_crystal_density_diffrn     1.474
_exptl_crystal_density_meas       ?
_exptl_crystal_density_method     'not measured'
_exptl_crystal_description        column
_exptl_crystal_F_000              1448
_exptl_crystal_size_max           0.3133
_exptl_crystal_size_mid           0.1578
_exptl_crystal_size_min           0.0865
_exptl_special_details
;
 ?
;
_exptl_transmission_factor_max    ?
_exptl_transmission_factor_min    ?
_diffrn_reflns_av_R_equivalents   0.058
_diffrn_reflns_av_unetI/netI      0.060
_diffrn_reflns_Laue_measured_fraction_full 0.999
_diffrn_reflns_Laue_measured_fraction_max 0.958
_diffrn_reflns_limit_h_max        16
_diffrn_reflns_limit_h_min       -16
_diffrn_reflns_limit_k_max        19
_diffrn_reflns_limit_k_min       -15
_diffrn_reflns_limit_l_max        19
_diffrn_reflns_limit_l_min       -21
_diffrn_reflns_number             25965
_diffrn_reflns_point_group_measured_fraction_full 0.999
_diffrn_reflns_point_group_measured_fraction_max 0.958
_diffrn_reflns_theta_full         67.500
_diffrn_reflns_theta_max          75.578
_diffrn_reflns_theta_min          3.518
_diffrn_ambient_temperature       90(2)
_diffrn_detector_area_resol_mean  10.3613
_diffrn_measured_fraction_theta_full 0.999
_diffrn_measured_fraction_theta_max 0.958
_diffrn_measurement_details
;
#__ type_ start__ end____ width___ exp.time_
  1 omega  -69.00   25.00   1.0000   12.0000
omega____ theta____ kappa____ phi______ frames
    -      -43.7877   57.0000  -90.0000 94

#__ type_ start__ end____ width___ exp.time_
  2 omega -112.00  -20.00   1.0000   12.0000
omega____ theta____ kappa____ phi______ frames
    -      -43.7877  -57.0000  120.0000 92

#__ type_ start__ end____ width___ exp.time_
  3 omega   38.00   73.00   1.0000   12.0000
omega____ theta____ kappa____ phi______ frames
    -       43.7877  -77.0000    0.0000 35

#__ type_ start__ end____ width___ exp.time_
  4 omega  -19.00   57.00   1.0000   12.0000
omega____ theta____ kappa____ phi______ frames
    -       43.7877  -57.0000  -30.0000 76

#__ type_ start__ end____ width___ exp.time_
  5 omega   23.00   63.00   1.0000   12.0000
omega____ theta____ kappa____ phi______ frames
    -       43.7877  -38.0000 -150.0000 40

#__ type_ start__ end____ width___ exp.time_
  6 omega   43.00   91.00   1.0000   48.0000
omega____ theta____ kappa____ phi______ frames
    -      105.8472  -95.0000  -30.0000 48

#__ type_ start__ end____ width___ exp.time_
  7 omega   33.00   63.00   1.0000   48.0000
omega____ theta____ kappa____ phi______ frames
    -      105.8472  -30.0000   60.0000 30

#__ type_ start__ end____ width___ exp.time_
  8 omega   33.00   69.00   1.0000   48.0000
omega____ theta____ kappa____ phi______ frames
    -      105.8472  -30.0000 -120.0000 36

#__ type_ start__ end____ width___ exp.time_
  9 omega   83.00  133.00   1.0000   48.0000
omega____ theta____ kappa____ phi______ frames
    -      105.8472   15.0000 -180.0000 50

#__ type_ start__ end____ width___ exp.time_
 10 omega   44.00   69.00   1.0000   48.0000
omega____ theta____ kappa____ phi______ frames
    -      105.8472  -45.0000  -60.0000 25

#__ type_ start__ end____ width___ exp.time_
 11 omega   43.00  110.00   1.0000   48.0000
omega____ theta____ kappa____ phi______ frames
    -      105.8472  -95.0000  120.0000 67

#__ type_ start__ end____ width___ exp.time_
 12 omega   33.00   69.00   1.0000   48.0000
omega____ theta____ kappa____ phi______ frames
    -      105.8472  -30.0000  150.0000 36

#__ type_ start__ end____ width___ exp.time_
 13 omega   34.00   66.00   1.0000   48.0000
omega____ theta____ kappa____ phi______ frames
    -      105.8472  -30.0000  -90.0000 32

#__ type_ start__ end____ width___ exp.time_
 14 omega   37.00   76.00   1.0000   48.0000
omega____ theta____ kappa____ phi______ frames
    -      105.8472  -45.0000   30.0000 39

#__ type_ start__ end____ width___ exp.time_
 15 omega   36.00   65.00   1.0000   48.0000
omega____ theta____ kappa____ phi______ frames
    -      105.8472  -45.0000 -120.0000 29

#__ type_ start__ end____ width___ exp.time_
 16 omega   39.00   71.00   1.0000   48.0000
omega____ theta____ kappa____ phi______ frames
    -      105.8472  -45.0000 -150.0000 32

#__ type_ start__ end____ width___ exp.time_
 17 omega   38.00   66.00   1.0000   48.0000
omega____ theta____ kappa____ phi______ frames
    -      105.8472  -30.0000  120.0000 28

#__ type_ start__ end____ width___ exp.time_
 18 omega   35.00   61.00   1.0000   48.0000
omega____ theta____ kappa____ phi______ frames
    -      105.8472  -30.0000 -180.0000 26

#__ type_ start__ end____ width___ exp.time_
 19 omega   47.00   74.00   1.0000   48.0000
omega____ theta____ kappa____ phi______ frames
    -      105.8472  -45.0000   90.0000 27

#__ type_ start__ end____ width___ exp.time_
 20 omega   55.00  118.00   1.0000   48.0000
omega____ theta____ kappa____ phi______ frames
    -      105.8472 -125.0000 -120.0000 63

#__ type_ start__ end____ width___ exp.time_
 21 omega   30.00  108.00   1.0000   48.0000
omega____ theta____ kappa____ phi______ frames
    -      105.8472  -95.0000   60.0000 78

#__ type_ start__ end____ width___ exp.time_
 22 omega   62.00  117.00   1.0000   48.0000
omega____ theta____ kappa____ phi______ frames
    -      105.8472 -125.0000   60.0000 55

#__ type_ start__ end____ width___ exp.time_
 23 omega   65.00  112.00   1.0000   48.0000
omega____ theta____ kappa____ phi______ frames
    -      105.8472 -125.0000  -30.0000 47

#__ type_ start__ end____ width___ exp.time_
 24 omega   77.00  104.00   1.0000   48.0000
omega____ theta____ kappa____ phi______ frames
    -      105.8472   77.0000  150.0000 27

#__ type_ start__ end____ width___ exp.time_
 25 omega   27.00  146.00   1.0000   48.0000
omega____ theta____ kappa____ phi______ frames
    -      105.8472  -15.0000  -60.0000 119

#__ type_ start__ end____ width___ exp.time_
 26 omega   86.00  113.00   1.0000   48.0000
omega____ theta____ kappa____ phi______ frames
    -      105.8472   45.0000   30.0000 27

#__ type_ start__ end____ width___ exp.time_
 27 omega   45.00   90.00   1.0000   48.0000
omega____ theta____ kappa____ phi______ frames
    -      105.8472  -95.0000 -120.0000 45
;
_diffrn_measurement_device_type   'SuperNova, Single source at offset), Atlas'
_diffrn_measurement_method        '\w scans'
_diffrn_orient_matrix_UB_11       0.0706931000
_diffrn_orient_matrix_UB_12       -0.0547140000
_diffrn_orient_matrix_UB_13       -0.0644338000
_diffrn_orient_matrix_UB_21       -0.1001704000
_diffrn_orient_matrix_UB_22       -0.0356403000
_diffrn_orient_matrix_UB_23       -0.0164998000
_diffrn_orient_matrix_UB_31       0.0006437000
_diffrn_orient_matrix_UB_32       0.0783322000
_diffrn_orient_matrix_UB_33       -0.0668527000
_diffrn_radiation_monochromator   mirror
_diffrn_radiation_type            'Cu K\a'
_diffrn_radiation_wavelength      1.5418
_diffrn_source                    'SuperNova (Cu) X-ray Source'
_diffrn_standards_number          0
_reflns_Friedel_coverage          0.000
_reflns_Friedel_fraction_full     .
_reflns_Friedel_fraction_max      .
_reflns_number_gt                 10928
_reflns_number_total              12864
_reflns_odcompleteness_completeness 99.87
_reflns_odcompleteness_iscentric  1
_reflns_odcompleteness_theta      67.13
_reflns_special_details
;
 Reflections were merged by SHELXL according to the crystal
 class for the calculation of statistics and refinement.
 
 _reflns_Friedel_fraction is defined as the number of unique
 Friedel pairs measured divided by the number that would be
 possible theoretically, ignoring centric projections and
 systematic absences.
;
_reflns_threshold_expression      'I > 2\s(I)'
_computing_cell_refinement
;
CrysAlisPro, Agilent Technologies,
Version 1.171.35.19 (release 27-10-2011 CrysAlis171 .NET)
(compiled Oct 27 2011,15:02:11)
;
_computing_data_collection
;
CrysAlisPro, Agilent Technologies,
Version 1.171.35.19 (release 27-10-2011 CrysAlis171 .NET)
(compiled Oct 27 2011,15:02:11)
;
_computing_data_reduction
;
CrysAlisPro, Agilent Technologies,
Version 1.171.35.19 (release 27-10-2011 CrysAlis171 .NET)
(compiled Oct 27 2011,15:02:11)
;
_computing_molecular_graphics
;
O. V. Dolomanov, L. J. Bourhis, R. J. Gildea, J. A. K. Howard and H. Puschmann,
OLEX2: a complete structure solution, refinement and analysis program.
J. Appl. Cryst. (2009). 42, 339-341.
;
_computing_publication_material
;
O. V. Dolomanov, L. J. Bourhis, R. J. Gildea, J. A. K. Howard and H. Puschmann,
OLEX2: a complete structure solution, refinement and analysis program.
J. Appl. Cryst. (2009). 42, 339-341.
;
_computing_structure_refinement
;
SHELXL, G.M. Sheldrick, Acta Cryst.
(2008). A64, 112-122
;
_computing_structure_solution     ?
_refine_diff_density_max          2.65
_refine_diff_density_min         -1.94
_refine_diff_density_rms          0.19
_refine_ls_extinction_coef        .
_refine_ls_extinction_method      none
_refine_ls_goodness_of_fit_ref    1.04
_refine_ls_hydrogen_treatment     constr
_refine_ls_matrix_type            full
_refine_ls_number_parameters      725
_refine_ls_number_reflns          12864
_refine_ls_number_restraints      6
_refine_ls_R_factor_all           0.067
_refine_ls_R_factor_gt            0.058
_refine_ls_restrained_S_all       1.04
_refine_ls_shift/su_max           0.001
_refine_ls_shift/su_mean          0.000
_refine_ls_structure_factor_coef  Fsqd
_refine_ls_weighting_details
'w=1/[\s^2^(Fo^2^)+(0.118P)^2^+0.092P] where P=(Fo^2^+2Fc^2^)/3'
_refine_ls_weighting_scheme       calc
_refine_ls_wR_factor_gt           0.153
_refine_ls_wR_factor_ref          0.164

_olex2_refinement_description
;
1. Fixed Uiso
 At 1.2 times of:
  All C(H) groups, All C(H,H) groups
 At 1.5 times of:
  All C(H,H,H) groups
2. Uiso/Uaniso restraints and constraints
Uanis(C64) \\sim Ueq: with sigma of 0.005 and sigma for terminal atoms of 0.01
3.a Ternary CH refined with riding coordinates:
 C1(H1)
3.b Secondary CH2 refined with riding coordinates:
 C46(H46A,H46B), C47(H47A,H47B)
3.c Aromatic/amide H refined with riding coordinates:
 C3(H3), C4(H4), C5(H5), C6(H6), C7(H7), C9(H9), C10(H10), C11(H11), C12(H12),
 C13(H13), C15(H15), C16(H16), C17(H17), C18(H18), C19(H19), C21(H21), C22(H22),
  C23(H23), C24(H24), C25(H25), C28(H28), C30(H30), C37(H37), C39(H39),
 C52(H52), C53(H53), C54(H54), C55(H55), C56(H56), C59(H59), C60(H60), C61(H61),
  C62(H62), C63(H63), C66(H66), C67(H67), C68(H68), C69(H69), C70(H70)
3.d Idealised Me refined as rotating group:
 C32(H32A,H32B,H32C), C33(H33A,H33B,H33C), C34(H34A,H34B,H34C), C41(H41A,H41B,
 H41C), C42(H42A,H42B,H42C), C43(H43A,H43B,H43C), C44(H44A,H44B,H44C), C45(H45A,
 H45B,H45C), C48(H48A,H48B,H48C), C49(H49A,H49B,H49C), C50(H50A,H50B,H50C),
 C57(H57A,H57B,H57C), C64(H64A,H64B,H64C)
;
_atom_sites_solution_hydrogens   'geom, Me from difmap'
_atom_sites_solution_primary      direct
_atom_sites_solution_secondary    difmap

loop_
  _atom_site_label
  _atom_site_type_symbol
  _atom_site_fract_x
  _atom_site_fract_y
  _atom_site_fract_z
  _atom_site_U_iso_or_equiv
  _atom_site_adp_type
  _atom_site_occupancy
  _atom_site_site_symmetry_order
  _atom_site_calc_flag
  _atom_site_refinement_flags_posn
  _atom_site_refinement_flags_adp
  _atom_site_refinement_flags_occupancy
  _atom_site_disorder_assembly
  _atom_site_disorder_group
 La1 La 0.66319(2) 0.23830(2) 0.79629(2) 0.02463(10) Uani 1 1 d . . . . .
 I1 I 0.48293(2) 0.37976(2) 0.76524(2) 0.03092(11) Uani 1 1 d . . . . .
 I2 I 0.76576(3) 0.05381(2) 0.86189(2) 0.03624(11) Uani 1 1 d . . . . .
 P1 P 0.81168(9) 0.31827(8) 0.61162(7) 0.0244(2) Uani 1 1 d . . . . .
 P2 P 0.86269(9) 0.36929(8) 0.77341(7) 0.0238(2) Uani 1 1 d . . . . .
 N1 N 0.7491(3) 0.2261(3) 0.6445(3) 0.0277(8) Uani 1 1 d . . . . .
 N2 N 0.7773(3) 0.3275(3) 0.8551(2) 0.0265(8) Uani 1 1 d . . . . .
 N3 N 0.5011(4) 0.1161(3) 0.8038(3) 0.0335(9) Uani 1 1 d . . . . .
 N4 N 0.5181(4) 0.2127(3) 0.9536(3) 0.0321(9) Uani 1 1 d . . . . .
 C1 C 0.7955(4) 0.3726(3) 0.6979(3) 0.0256(9) Uani 1 1 d . . . . .
 H1 H 0.7550 0.4298 0.6928 0.031 Uiso 1 1 calc R U . . .
 C2 C 0.7566(4) 0.3901(4) 0.5365(3) 0.0280(10) Uani 1 1 d . . . . .
 C3 C 0.6751(4) 0.4520(4) 0.5590(3) 0.0328(11) Uani 1 1 d . . . . .
 H3 H 0.6475 0.4598 0.6151 0.039 Uiso 1 1 calc R U . . .
 C4 C 0.6340(4) 0.5021(4) 0.5006(3) 0.0347(11) Uani 1 1 d . . . . .
 H4 H 0.5790 0.5446 0.5170 0.042 Uiso 1 1 calc R U . . .
 C5 C 0.6718(5) 0.4913(4) 0.4175(3) 0.0401(13) Uani 1 1 d . . . . .
 H5 H 0.6420 0.5252 0.3777 0.048 Uiso 1 1 calc R U . . .
 C6 C 0.7534(5) 0.4306(5) 0.3942(3) 0.0427(14) Uani 1 1 d . . . . .
 H6 H 0.7795 0.4224 0.3381 0.051 Uiso 1 1 calc R U . . .
 C7 C 0.7976(5) 0.3812(4) 0.4530(3) 0.0342(11) Uani 1 1 d . . . . .
 H7 H 0.8556 0.3415 0.4363 0.041 Uiso 1 1 calc R U . . .
 C8 C 0.9500(4) 0.3110(4) 0.5539(3) 0.0271(10) Uani 1 1 d . . . . .
 C9 C 1.0111(4) 0.3844(4) 0.5463(3) 0.0331(11) Uani 1 1 d . . . . .
 H9 H 0.9814 0.4336 0.5742 0.040 Uiso 1 1 calc R U . . .
 C10 C 1.1158(5) 0.3877(4) 0.4982(3) 0.0362(12) Uani 1 1 d . . . . .
 H10 H 1.1569 0.4387 0.4935 0.043 Uiso 1 1 calc R U . . .
 C11 C 1.1596(4) 0.3159(4) 0.4573(3) 0.0365(12) Uani 1 1 d . . . . .
 H11 H 1.2313 0.3173 0.4253 0.044 Uiso 1 1 calc R U . . .
 C12 C 1.0989(5) 0.2428(4) 0.4632(3) 0.0390(12) Uani 1 1 d . . . . .
 H12 H 1.1287 0.1939 0.4348 0.047 Uiso 1 1 calc R U . . .
 C13 C 0.9945(5) 0.2401(4) 0.5105(3) 0.0343(11) Uani 1 1 d . . . . .
 H13 H 0.9529 0.1898 0.5134 0.041 Uiso 1 1 calc R U . . .
 C14 C 0.9090(4) 0.4757(4) 0.7828(3) 0.0280(10) Uani 1 1 d . . . . .
 C15 C 0.9053(4) 0.5480(4) 0.7248(3) 0.0312(10) Uani 1 1 d . . . . .
 H15 H 0.8714 0.5432 0.6825 0.037 Uiso 1 1 calc R U . . .
 C16 C 0.9511(5) 0.6271(4) 0.7287(3) 0.0363(11) Uani 1 1 d . . . . .
 H16 H 0.9490 0.6762 0.6887 0.044 Uiso 1 1 calc R U . . .
 C17 C 1.0001(5) 0.6349(4) 0.7912(4) 0.0373(12) Uani 1 1 d . . . . .
 H17 H 1.0319 0.6889 0.7934 0.045 Uiso 1 1 calc R U . . .
 C18 C 1.0024(5) 0.5632(4) 0.8506(3) 0.0356(11) Uani 1 1 d . . . . .
 H18 H 1.0352 0.5688 0.8934 0.043 Uiso 1 1 calc R U . . .
 C19 C 0.9571(4) 0.4845(4) 0.8471(3) 0.0313(10) Uani 1 1 d . . . . .
 H19 H 0.9582 0.4360 0.8879 0.038 Uiso 1 1 calc R U . . .
 C20 C 0.9881(4) 0.3082(4) 0.7436(3) 0.0278(10) Uani 1 1 d . . . . .
 C21 C 1.0850(4) 0.3499(4) 0.7114(3) 0.0343(11) Uani 1 1 d . . . . .
 H21 H 1.0883 0.4124 0.7093 0.041 Uiso 1 1 calc R U . . .
 C22 C 1.1772(5) 0.3012(4) 0.6823(4) 0.0399(13) Uani 1 1 d . . . . .
 H22 H 1.2427 0.3306 0.6599 0.048 Uiso 1 1 calc R U . . .
 C23 C 1.1742(5) 0.2103(5) 0.6858(3) 0.0396(13) Uani 1 1 d . . . . .
 H23 H 1.2375 0.1774 0.6656 0.048 Uiso 1 1 calc R U . . .
 C24 C 1.0790(5) 0.1675(4) 0.7186(3) 0.0351(11) Uani 1 1 d . . . . .
 H24 H 1.0771 0.1049 0.7205 0.042 Uiso 1 1 calc R U . . .
 C25 C 0.9856(4) 0.2148(4) 0.7490(3) 0.0307(10) Uani 1 1 d . . . . .
 H25 H 0.9209 0.1847 0.7731 0.037 Uiso 1 1 calc R U . . .
 C26 C 0.7335(4) 0.1619(4) 0.5938(3) 0.0302(10) Uani 1 1 d . . . . .
 C27 C 0.6477(5) 0.1699(4) 0.5559(3) 0.0324(11) Uani 1 1 d . . . . .
 C28 C 0.6317(5) 0.1045(4) 0.5109(3) 0.0358(11) Uani 1 1 d . . . . .
 H28 H 0.5739 0.1111 0.4859 0.043 Uiso 1 1 calc R U . . .
 C29 C 0.6976(6) 0.0291(4) 0.5009(3) 0.0419(13) Uani 1 1 d . . . . .
 C30 C 0.7799(5) 0.0207(4) 0.5407(3) 0.0386(12) Uani 1 1 d . . . . .
 H30 H 0.8253 -0.0303 0.5354 0.046 Uiso 1 1 calc R U . . .
 C31 C 0.7977(5) 0.0842(4) 0.5877(3) 0.0337(11) Uani 1 1 d . . . . .
 C32 C 0.5716(4) 0.2484(4) 0.5614(3) 0.0344(11) Uani 1 1 d . . . . .
 H32A H 0.5969 0.2927 0.5141 0.052 Uiso 1 1 calc R U . . .
 H32B H 0.5677 0.2744 0.6119 0.052 Uiso 1 1 calc R U . . .
 H32C H 0.5008 0.2291 0.5617 0.052 Uiso 1 1 calc R U . . .
 C33 C 0.6838(7) -0.0374(5) 0.4463(4) 0.0526(17) Uani 1 1 d . . . . .
 H33A H 0.7370 -0.0276 0.3937 0.079 Uiso 1 1 calc R U . . .
 H33B H 0.6123 -0.0307 0.4373 0.079 Uiso 1 1 calc R U . . .
 H33C H 0.6932 -0.0974 0.4725 0.079 Uiso 1 1 calc R U . . .
 C34 C 0.8861(5) 0.0654(4) 0.6307(3) 0.0362(12) Uani 1 1 d . . . . .
 H34A H 0.8617 0.0231 0.6796 0.054 Uiso 1 1 calc R U . . .
 H34B H 0.9058 0.1205 0.6466 0.054 Uiso 1 1 calc R U . . .
 H34C H 0.9481 0.0403 0.5936 0.054 Uiso 1 1 calc R U . . .
 C35 C 0.7683(4) 0.3513(4) 0.9358(3) 0.0276(10) Uani 1 1 d . . . . .
 C36 C 0.8179(4) 0.3007(4) 0.9905(3) 0.0274(10) Uani 1 1 d . . . . .
 C37 C 0.8030(4) 0.3221(4) 1.0701(3) 0.0286(10) Uani 1 1 d . . . . .
 H37 H 0.8388 0.2879 1.1059 0.034 Uiso 1 1 calc R U . . .
 C38 C 0.7368(4) 0.3923(4) 1.0982(3) 0.0309(10) Uani 1 1 d . . . . .
 C39 C 0.6878(4) 0.4426(4) 1.0428(3) 0.0323(11) Uani 1 1 d . . . . .
 H39 H 0.6421 0.4907 1.0607 0.039 Uiso 1 1 calc R U . . .
 C40 C 0.7039(4) 0.4244(4) 0.9620(3) 0.0285(10) Uani 1 1 d . . . . .
 C41 C 0.8901(5) 0.2227(4) 0.9656(3) 0.0345(11) Uani 1 1 d . . . . .
 H41A H 0.9502 0.2428 0.9199 0.052 Uiso 1 1 calc R U . . .
 H41B H 0.8502 0.1789 0.9486 0.052 Uiso 1 1 calc R U . . .
 H41C H 0.9167 0.1957 1.0120 0.052 Uiso 1 1 calc R U . . .
 C42 C 0.7186(5) 0.4131(4) 1.1850(3) 0.0368(12) Uani 1 1 d . . . . .
 H42A H 0.7570 0.4666 1.1854 0.055 Uiso 1 1 calc R U . . .
 H42B H 0.7447 0.3634 1.2175 0.055 Uiso 1 1 calc R U . . .
 H42C H 0.6423 0.4226 1.2084 0.055 Uiso 1 1 calc R U . . .
 C43 C 0.6508(5) 0.4834(4) 0.9051(3) 0.0336(11) Uani 1 1 d . . . . .
 H43A H 0.6120 0.4469 0.8794 0.050 Uiso 1 1 calc R U . . .
 H43B H 0.7049 0.5170 0.8627 0.050 Uiso 1 1 calc R U . . .
 H43C H 0.6009 0.5245 0.9364 0.050 Uiso 1 1 calc R U . . .
 C44 C 0.5447(5) 0.0382(4) 0.7633(4) 0.0398(12) Uani 1 1 d . . . . .
 H44A H 0.6022 0.0115 0.7864 0.060 Uiso 1 1 calc R U . . .
 H44B H 0.5727 0.0559 0.7045 0.060 Uiso 1 1 calc R U . . .
 H44C H 0.4884 -0.0049 0.7717 0.060 Uiso 1 1 calc R U . . .
 C45 C 0.4106(5) 0.1508(4) 0.7696(4) 0.0392(12) Uani 1 1 d . . . . .
 H45A H 0.4370 0.1694 0.7108 0.059 Uiso 1 1 calc R U . . .
 H45B H 0.3770 0.2015 0.7973 0.059 Uiso 1 1 calc R U . . .
 H45C H 0.3582 0.1042 0.7782 0.059 Uiso 1 1 calc R U . . .
 C46 C 0.4589(5) 0.0879(4) 0.8928(3) 0.0384(12) Uani 1 1 d . . . . .
 H46A H 0.5138 0.0508 0.9127 0.046 Uiso 1 1 calc R U . . .
 H46B H 0.3962 0.0506 0.9005 0.046 Uiso 1 1 calc R U . . .
 C47 C 0.4267(4) 0.1639(4) 0.9451(3) 0.0376(12) Uani 1 1 d . . . . .
 H47A H 0.3799 0.2059 0.9205 0.045 Uiso 1 1 calc R U . . .
 H47B H 0.3851 0.1399 1.0003 0.045 Uiso 1 1 calc R U . . .
 C48 C 0.4760(5) 0.2961(4) 0.9871(3) 0.0406(13) Uani 1 1 d . . . . .
 H48A H 0.4425 0.3324 0.9485 0.061 Uiso 1 1 calc R U . . .
 H48B H 0.5345 0.3287 0.9957 0.061 Uiso 1 1 calc R U . . .
 H48C H 0.4232 0.2826 1.0395 0.061 Uiso 1 1 calc R U . . .
 C49 C 0.5669(5) 0.1616(4) 1.0168(3) 0.0393(12) Uani 1 1 d . . . . .
 H49A H 0.6308 0.1916 1.0191 0.059 Uiso 1 1 calc R U . . .
 H49B H 0.5862 0.1017 1.0021 0.059 Uiso 1 1 calc R U . . .
 H49C H 0.5155 0.1583 1.0705 0.059 Uiso 1 1 calc R U . . .
 C50 C 1.1285(6) 0.0854(5) 0.9369(5) 0.0567(17) Uani 1 1 d . . . . .
 H50A H 1.0520 0.0807 0.9427 0.085 Uiso 1 1 calc R U . . .
 H50B H 1.1516 0.0384 0.9738 0.085 Uiso 1 1 calc R U . . .
 H50C H 1.1674 0.0792 0.8803 0.085 Uiso 1 1 calc R U . . .
 C51 C 1.1501(5) 0.1717(4) 0.9577(4) 0.0413(13) Uani 1 1 d . . . . .
 C52 C 1.1525(6) 0.1833(5) 1.0387(4) 0.0492(16) Uani 1 1 d . . . . .
 H52 H 1.1427 0.1341 1.0799 0.059 Uiso 1 1 calc R U . . .
 C53 C 1.1689(6) 0.2649(6) 1.0575(5) 0.0571(19) Uani 1 1 d . . . . .
 H53 H 1.1692 0.2719 1.1121 0.069 Uiso 1 1 calc R U . . .
 C54 C 1.1851(7) 0.3375(6) 0.9987(5) 0.0606(19) Uani 1 1 d . . . . .
 H54 H 1.1958 0.3941 1.0128 0.073 Uiso 1 1 calc R U . . .
 C55 C 1.1857(6) 0.3269(5) 0.9190(5) 0.0543(18) Uani 1 1 d . . . . .
 H55 H 1.1985 0.3763 0.8779 0.065 Uiso 1 1 calc R U . . .
 C56 C 1.1678(5) 0.2455(5) 0.8987(4) 0.0454(15) Uani 1 1 d . . . . .
 H56 H 1.1676 0.2395 0.8439 0.055 Uiso 1 1 calc R U . . .
 C57 C 1.7335(6) 0.8397(5) 0.7490(4) 0.0512(16) Uani 1 1 d . . . . .
 H57A H 1.8032 0.8107 0.7460 0.077 Uiso 1 1 calc R U . . .
 H57B H 1.7002 0.8507 0.8055 0.077 Uiso 1 1 calc R U . . .
 H57C H 1.7426 0.8961 0.7134 0.077 Uiso 1 1 calc R U . . .
 C58 C 1.6637(5) 0.7808(4) 0.7212(4) 0.0410(13) Uani 1 1 d . . . . .
 C59 C 1.6493(6) 0.6935(4) 0.7566(4) 0.0442(14) Uani 1 1 d . . . . .
 H59 H 1.6828 0.6715 0.7987 0.053 Uiso 1 1 calc R U . . .
 C60 C 1.5869(6) 0.6388(5) 0.7310(4) 0.0487(15) Uani 1 1 d . . . . .
 H60 H 1.5775 0.5794 0.7562 0.058 Uiso 1 1 calc R U . . .
 C61 C 1.5376(6) 0.6681(6) 0.6696(5) 0.0563(18) Uani 1 1 d . . . . .
 H61 H 1.4962 0.6291 0.6515 0.068 Uiso 1 1 calc R U . . .
 C62 C 1.5495(6) 0.7547(6) 0.6350(4) 0.058(2) Uani 1 1 d . . . . .
 H62 H 1.5141 0.7768 0.5940 0.070 Uiso 1 1 calc R U . . .
 C63 C 1.6134(6) 0.8098(5) 0.6601(4) 0.0494(16) Uani 1 1 d . . . . .
 H63 H 1.6229 0.8691 0.6346 0.059 Uiso 1 1 calc R U . . .
 C64 C 1.2966(10) 0.8693(8) 0.8111(7) 0.087(3) Uani 1 1 d . U . . .
 H64A H 1.3214 0.9302 0.8038 0.131 Uiso 1 1 calc R U . . .
 H64B H 1.3564 0.8300 0.7894 0.131 Uiso 1 1 calc R U . . .
 H64C H 1.2668 0.8506 0.8694 0.131 Uiso 1 1 calc R U . . .
 C65 C 1.2136(8) 0.8652(6) 0.7665(5) 0.061(2) Uani 1 1 d . . . . .
 C66 C 1.2322(6) 0.8293(5) 0.6943(5) 0.0530(17) Uani 1 1 d . . . . .
 H66 H 1.3001 0.8032 0.6730 0.064 Uiso 1 1 calc R U . . .
 C67 C 1.1550(7) 0.8298(5) 0.6511(4) 0.0532(16) Uani 1 1 d . . . . .
 H67 H 1.1710 0.8055 0.6005 0.064 Uiso 1 1 calc R U . . .
 C68 C 1.0557(6) 0.8652(5) 0.6814(4) 0.0521(16) Uani 1 1 d . . . . .
 H68 H 1.0024 0.8649 0.6525 0.062 Uiso 1 1 calc R U . . .
 C69 C 1.0342(7) 0.9012(5) 0.7541(5) 0.0563(18) Uani 1 1 d . . . . .
 H69 H 0.9658 0.9265 0.7750 0.068 Uiso 1 1 calc R U . . .
 C70 C 1.1110(8) 0.9011(5) 0.7971(4) 0.061(2) Uani 1 1 d . . . . .
 H70 H 1.0945 0.9255 0.8477 0.073 Uiso 1 1 calc R U . . .

loop_
  _atom_site_aniso_label
  _atom_site_aniso_U_11
  _atom_site_aniso_U_22
  _atom_site_aniso_U_33
  _atom_site_aniso_U_23
  _atom_site_aniso_U_13
  _atom_site_aniso_U_12
 La1 0.02442(15) 0.02296(17) 0.02594(15) 0.00013(10) -0.00687(10) -0.00010(10)
 I1 0.02838(17) 0.02979(19) 0.03306(17) 0.00137(12) -0.00825(12) 0.00355(12)
 I2 0.03600(18) 0.0275(2) 0.04378(19) 0.00291(14) -0.01152(13) 0.00256(13)
 P1 0.0255(5) 0.0231(6) 0.0250(5) -0.0004(4) -0.0082(4) 0.0002(4)
 P2 0.0243(5) 0.0233(6) 0.0244(5) -0.0009(4) -0.0084(4) 0.0010(4)
 N1 0.029(2) 0.024(2) 0.0308(19) -0.0023(16) -0.0101(15) -0.0009(16)
 N2 0.031(2) 0.028(2) 0.0197(17) -0.0004(15) -0.0076(14) -0.0015(16)
 N3 0.032(2) 0.031(2) 0.037(2) 0.0023(18) -0.0109(17) -0.0025(18)
 N4 0.030(2) 0.036(3) 0.0299(19) 0.0012(17) -0.0105(16) 0.0037(18)
 C1 0.028(2) 0.024(3) 0.024(2) -0.0012(17) -0.0078(17) 0.0004(18)
 C2 0.031(2) 0.027(3) 0.027(2) 0.0033(18) -0.0118(18) -0.0041(19)
 C3 0.030(2) 0.034(3) 0.033(2) 0.001(2) -0.0076(19) -0.006(2)
 C4 0.029(2) 0.036(3) 0.040(3) 0.001(2) -0.013(2) -0.001(2)
 C5 0.042(3) 0.043(3) 0.037(3) 0.012(2) -0.022(2) -0.002(2)
 C6 0.047(3) 0.054(4) 0.029(2) -0.001(2) -0.014(2) -0.003(3)
 C7 0.039(3) 0.034(3) 0.030(2) -0.003(2) -0.011(2) 0.000(2)
 C8 0.031(2) 0.029(3) 0.0215(19) 0.0008(17) -0.0082(17) 0.0015(19)
 C9 0.034(3) 0.033(3) 0.032(2) -0.002(2) -0.0092(19) 0.004(2)
 C10 0.036(3) 0.037(3) 0.032(2) 0.001(2) -0.003(2) -0.010(2)
 C11 0.031(3) 0.039(3) 0.037(3) 0.002(2) -0.009(2) 0.005(2)
 C12 0.037(3) 0.039(3) 0.036(3) 0.000(2) -0.005(2) 0.006(2)
 C13 0.040(3) 0.027(3) 0.032(2) -0.003(2) -0.001(2) 0.000(2)
 C14 0.029(2) 0.027(3) 0.028(2) -0.0025(18) -0.0076(18) -0.0001(19)
 C15 0.032(2) 0.030(3) 0.031(2) -0.002(2) -0.0092(19) 0.003(2)
 C16 0.041(3) 0.029(3) 0.038(3) 0.001(2) -0.010(2) -0.001(2)
 C17 0.039(3) 0.029(3) 0.043(3) -0.003(2) -0.008(2) -0.009(2)
 C18 0.039(3) 0.040(3) 0.032(2) -0.007(2) -0.012(2) -0.008(2)
 C19 0.034(3) 0.035(3) 0.027(2) -0.0012(19) -0.0112(19) -0.005(2)
 C20 0.031(2) 0.031(3) 0.0227(19) -0.0027(18) -0.0096(17) 0.0035(19)
 C21 0.029(2) 0.036(3) 0.037(2) 0.002(2) -0.0098(19) 0.003(2)
 C22 0.031(3) 0.043(4) 0.040(3) 0.005(2) -0.005(2) 0.001(2)
 C23 0.032(3) 0.050(4) 0.036(3) -0.007(2) -0.009(2) 0.008(2)
 C24 0.037(3) 0.033(3) 0.039(3) -0.007(2) -0.017(2) 0.010(2)
 C25 0.026(2) 0.030(3) 0.036(2) -0.006(2) -0.0073(18) -0.0010(19)
 C26 0.036(3) 0.023(3) 0.029(2) -0.0033(18) -0.0050(19) -0.004(2)
 C27 0.040(3) 0.034(3) 0.023(2) 0.0034(19) -0.0106(19) -0.007(2)
 C28 0.045(3) 0.032(3) 0.034(2) 0.000(2) -0.016(2) -0.008(2)
 C29 0.059(4) 0.034(3) 0.033(2) -0.005(2) -0.009(2) -0.013(3)
 C30 0.050(3) 0.025(3) 0.039(3) -0.005(2) -0.007(2) -0.001(2)
 C31 0.040(3) 0.024(3) 0.034(2) 0.001(2) -0.006(2) -0.001(2)
 C32 0.032(3) 0.039(3) 0.036(2) -0.003(2) -0.016(2) -0.003(2)
 C33 0.077(5) 0.040(4) 0.046(3) -0.009(3) -0.023(3) -0.009(3)
 C34 0.041(3) 0.031(3) 0.038(3) -0.001(2) -0.016(2) 0.010(2)
 C35 0.028(2) 0.031(3) 0.023(2) -0.0033(18) -0.0059(17) -0.0038(19)
 C36 0.029(2) 0.027(3) 0.026(2) 0.0010(18) -0.0092(17) 0.0008(19)
 C37 0.031(2) 0.031(3) 0.025(2) -0.0016(18) -0.0105(17) -0.0005(19)
 C38 0.034(2) 0.032(3) 0.028(2) -0.0027(19) -0.0102(19) -0.002(2)
 C39 0.029(2) 0.033(3) 0.034(2) -0.004(2) -0.0060(19) 0.002(2)
 C40 0.024(2) 0.031(3) 0.030(2) 0.0001(19) -0.0082(17) -0.0001(19)
 C41 0.037(3) 0.035(3) 0.033(2) -0.003(2) -0.012(2) 0.009(2)
 C42 0.044(3) 0.040(3) 0.029(2) -0.010(2) -0.013(2) 0.008(2)
 C43 0.037(3) 0.032(3) 0.032(2) -0.001(2) -0.011(2) 0.006(2)
 C44 0.037(3) 0.034(3) 0.047(3) -0.002(2) -0.010(2) -0.008(2)
 C45 0.036(3) 0.036(3) 0.047(3) 0.006(2) -0.018(2) -0.010(2)
 C46 0.035(3) 0.036(3) 0.040(3) 0.004(2) -0.006(2) -0.009(2)
 C47 0.030(3) 0.043(3) 0.035(3) 0.004(2) -0.003(2) -0.004(2)
 C48 0.041(3) 0.041(3) 0.036(3) 0.002(2) -0.005(2) -0.005(2)
 C49 0.039(3) 0.044(3) 0.033(2) 0.004(2) -0.010(2) 0.001(2)
 C50 0.049(4) 0.052(4) 0.073(5) -0.007(3) -0.022(3) 0.001(3)
 C51 0.035(3) 0.042(3) 0.045(3) 0.000(2) -0.010(2) 0.007(2)
 C52 0.046(3) 0.060(5) 0.034(3) 0.004(3) -0.004(2) 0.011(3)
 C53 0.049(4) 0.075(6) 0.048(3) -0.015(3) -0.015(3) 0.016(4)
 C54 0.051(4) 0.057(5) 0.074(5) -0.010(4) -0.015(3) 0.001(3)
 C55 0.045(3) 0.051(4) 0.057(4) 0.013(3) -0.007(3) 0.002(3)
 C56 0.034(3) 0.058(4) 0.044(3) 0.000(3) -0.012(2) 0.001(3)
 C57 0.053(4) 0.045(4) 0.056(4) -0.013(3) -0.009(3) -0.009(3)
 C58 0.037(3) 0.040(3) 0.043(3) -0.008(2) -0.002(2) 0.001(2)
 C59 0.055(4) 0.038(3) 0.038(3) 0.004(2) -0.012(2) 0.002(3)
 C60 0.054(4) 0.039(4) 0.050(3) 0.005(3) -0.013(3) -0.005(3)
 C61 0.051(4) 0.065(5) 0.053(4) -0.012(3) -0.007(3) -0.011(3)
 C62 0.044(4) 0.085(6) 0.047(3) 0.001(3) -0.017(3) 0.007(3)
 C63 0.050(4) 0.043(4) 0.047(3) 0.010(3) -0.007(3) 0.010(3)
 C64 0.092(6) 0.087(6) 0.090(6) 0.030(5) -0.047(5) -0.041(5)
 C65 0.077(5) 0.048(4) 0.060(4) 0.023(3) -0.033(4) -0.022(4)
 C66 0.047(4) 0.041(4) 0.060(4) 0.012(3) -0.003(3) 0.002(3)
 C67 0.065(4) 0.042(4) 0.047(3) 0.000(3) -0.008(3) -0.001(3)
 C68 0.055(4) 0.047(4) 0.050(3) 0.010(3) -0.013(3) -0.005(3)
 C69 0.061(4) 0.047(4) 0.052(4) 0.007(3) -0.007(3) 0.012(3)
 C70 0.094(6) 0.039(4) 0.044(3) 0.000(3) -0.008(4) -0.007(4)

_geom_special_details
;
 All esds (except the esd in the dihedral angle between two l.s. planes)
 are estimated using the full covariance matrix.  The cell esds are taken
 into account individually in the estimation of esds in distances, angles
 and torsion angles; correlations between esds in cell parameters are only
 used when they are defined by crystal symmetry.  An approximate (isotropic)
 treatment of cell esds is used for estimating esds involving l.s. planes.
;
loop_
  _geom_bond_atom_site_label_1
  _geom_bond_atom_site_label_2
  _geom_bond_distance
  _geom_bond_site_symmetry_2
  _geom_bond_publ_flag
 La1 I1 3.2026(5) . ?
 La1 I2 3.2432(5) . ?
 La1 N1 2.564(4) . ?
 La1 N2 2.526(4) . ?
 La1 N3 2.852(5) . ?
 La1 N4 2.844(4) . ?
 La1 C1 2.822(5) . ?
 P1 N1 1.622(5) . ?
 P1 C1 1.736(5) . ?
 P1 C2 1.840(5) . ?
 P1 C8 1.819(5) . ?
 P2 N2 1.620(4) . ?
 P2 C1 1.727(5) . ?
 P2 C14 1.798(6) . ?
 P2 C20 1.822(5) . ?
 N1 C26 1.436(7) . ?
 N2 C35 1.439(6) . ?
 N3 C44 1.463(8) . ?
 N3 C45 1.490(7) . ?
 N3 C46 1.486(7) . ?
 N4 C47 1.481(8) . ?
 N4 C48 1.479(8) . ?
 N4 C49 1.504(7) . ?
 C1 H1 1.0000 . ?
 C2 C3 1.392(8) . ?
 C2 C7 1.405(7) . ?
 C3 H3 0.9500 . ?
 C3 C4 1.378(8) . ?
 C4 H4 0.9500 . ?
 C4 C5 1.401(9) . ?
 C5 H5 0.9500 . ?
 C5 C6 1.382(10) . ?
 C6 H6 0.9500 . ?
 C6 C7 1.401(8) . ?
 C7 H7 0.9500 . ?
 C8 C9 1.378(8) . ?
 C8 C13 1.401(8) . ?
 C9 H9 0.9500 . ?
 C9 C10 1.396(8) . ?
 C10 H10 0.9500 . ?
 C10 C11 1.388(9) . ?
 C11 H11 0.9500 . ?
 C11 C12 1.377(9) . ?
 C12 H12 0.9500 . ?
 C12 C13 1.388(8) . ?
 C13 H13 0.9500 . ?
 C14 C15 1.391(7) . ?
 C14 C19 1.417(7) . ?
 C15 H15 0.9500 . ?
 C15 C16 1.388(9) . ?
 C16 H16 0.9500 . ?
 C16 C17 1.395(9) . ?
 C17 H17 0.9500 . ?
 C17 C18 1.395(9) . ?
 C18 H18 0.9500 . ?
 C18 C19 1.378(8) . ?
 C19 H19 0.9500 . ?
 C20 C21 1.390(8) . ?
 C20 C25 1.414(8) . ?
 C21 H21 0.9500 . ?
 C21 C22 1.388(8) . ?
 C22 H22 0.9500 . ?
 C22 C23 1.380(10) . ?
 C23 H23 0.9500 . ?
 C23 C24 1.381(9) . ?
 C24 H24 0.9500 . ?
 C24 C25 1.394(8) . ?
 C25 H25 0.9500 . ?
 C26 C27 1.421(8) . ?
 C26 C31 1.411(8) . ?
 C27 C28 1.386(8) . ?
 C27 C32 1.509(8) . ?
 C28 H28 0.9500 . ?
 C28 C29 1.398(10) . ?
 C29 C30 1.401(10) . ?
 C29 C33 1.505(9) . ?
 C30 H30 0.9500 . ?
 C30 C31 1.395(9) . ?
 C31 C34 1.513(8) . ?
 C32 H32A 0.9800 . ?
 C32 H32B 0.9800 . ?
 C32 H32C 0.9800 . ?
 C33 H33A 0.9800 . ?
 C33 H33B 0.9800 . ?
 C33 H33C 0.9800 . ?
 C34 H34A 0.9800 . ?
 C34 H34B 0.9800 . ?
 C34 H34C 0.9800 . ?
 C35 C36 1.399(7) . ?
 C35 C40 1.405(8) . ?
 C36 C37 1.397(7) . ?
 C36 C41 1.510(7) . ?
 C37 H37 0.9500 . ?
 C37 C38 1.391(8) . ?
 C38 C39 1.400(7) . ?
 C38 C42 1.506(7) . ?
 C39 H39 0.9500 . ?
 C39 C40 1.399(7) . ?
 C40 C43 1.512(7) . ?
 C41 H41A 0.9800 . ?
 C41 H41B 0.9800 . ?
 C41 H41C 0.9800 . ?
 C42 H42A 0.9800 . ?
 C42 H42B 0.9800 . ?
 C42 H42C 0.9800 . ?
 C43 H43A 0.9800 . ?
 C43 H43B 0.9800 . ?
 C43 H43C 0.9800 . ?
 C44 H44A 0.9800 . ?
 C44 H44B 0.9800 . ?
 C44 H44C 0.9800 . ?
 C45 H45A 0.9800 . ?
 C45 H45B 0.9800 . ?
 C45 H45C 0.9800 . ?
 C46 H46A 0.9900 . ?
 C46 H46B 0.9900 . ?
 C46 C47 1.525(9) . ?
 C47 H47A 0.9900 . ?
 C47 H47B 0.9900 . ?
 C48 H48A 0.9800 . ?
 C48 H48B 0.9800 . ?
 C48 H48C 0.9800 . ?
 C49 H49A 0.9800 . ?
 C49 H49B 0.9800 . ?
 C49 H49C 0.9800 . ?
 C50 H50A 0.9800 . ?
 C50 H50B 0.9800 . ?
 C50 H50C 0.9800 . ?
 C50 C51 1.463(11) . ?
 C51 C52 1.421(9) . ?
 C51 C56 1.396(10) . ?
 C52 H52 0.9500 . ?
 C52 C53 1.361(12) . ?
 C53 H53 0.9500 . ?
 C53 C54 1.380(13) . ?
 C54 H54 0.9500 . ?
 C54 C55 1.386(12) . ?
 C55 H55 0.9500 . ?
 C55 C56 1.374(12) . ?
 C56 H56 0.9500 . ?
 C57 H57A 0.9800 . ?
 C57 H57B 0.9800 . ?
 C57 H57C 0.9800 . ?
 C57 C58 1.506(10) . ?
 C58 C59 1.391(10) . ?
 C58 C63 1.384(10) . ?
 C59 H59 0.9500 . ?
 C59 C60 1.373(11) . ?
 C60 H60 0.9500 . ?
 C60 C61 1.382(11) . ?
 C61 H61 0.9500 . ?
 C61 C62 1.375(13) . ?
 C62 H62 0.9500 . ?
 C62 C63 1.387(12) . ?
 C63 H63 0.9500 . ?
 C64 H64A 0.9800 . ?
 C64 H64B 0.9800 . ?
 C64 H64C 0.9800 . ?
 C64 C65 1.479(13) . ?
 C65 C66 1.368(13) . ?
 C65 C70 1.410(14) . ?
 C66 H66 0.9500 . ?
[truncated: 299,530 more chars]
